# Supplementary material for: The Candida albicans biofilm gene circuit modulated at the chromatin level by a recent molecular histone innovation
Source: PLoS Biol. 2019 Aug 9;17(8):e3000422. doi: 10.1371/journal.pbio.3000422 (PMC6703697; doi:10.1371/journal.pbio.3000422)
Supplement: S1 Data — S1A Table contains a list of all transcriptionally altered genes in the null mutants of hht1 as compared to the wild type during planktonic growth. S1B and S1C Table contain lists of up- and down-regulated genes in hht1 null cells during planktonic growth, respectively. S1D Table contains p values of pathways altered in hht1 null mutants when grown in the planktonic condition. S1E Table contains a list of all transcriptionally altered genes in the null mutants of hht1 as compared to the wild type during biofilm growth. S1F and S1G Table contain lists of up- and down-regulated genes in hht1 null cells in biofilm, respectively. S1H Table contains p values of pathways altered in hht1 null mutants grown in the biofilm condition. S1I Table contains normalized percent immunoprecipitated values. (XLSX) [file pbio.3000422.s012.xlsx]

## Sheet: Table S1A
Planktonic state microarray data H3VCTG mutant vs wild type
ProbeName	Fold_SC 5314_1	Flag_SC 5314_1	Fold_SC 5314_2	Flag_SC 5314_2	GeomeanFold_SC 5314	Fold_SC 5314 Delta Delta 2,7	Flag_SC 5314 Delta Delta 2,7	Fold_SC 5314 Delta Delta 4,7	Flag_SC 5314 Delta Delta 4,7	GeomeanFold_SC 5314 Delta Delta	p-value	gProcessedSignal_SC 5314_1	gProcessedSignal_SC 5314_2	gProcessedSignal_SC 5314 Delta Delta 2,7	gProcessedSignal_SC 5314 Delta Delta 4,7	GeneName	SystematicName	Description	Sequence	Primary CGDID	ORF ID	Standard gene name (locus name)	Aliases	Chromosome	Description 1	MASTER_ID	GO_Avadis_	molecular_function	cellular_component	biological_process	GO
CAF0007359	0.0290651	Compromised	-0.0290651	Compromised	0	5.23761	Detected	4.88365	Detected	5.06063	0.00125367	3.07447	2.90576	137	85.8	CAF0007359	CAF0007359	CAF0007359 (alignment of 60bp with 100.00% identity) , Description: Subunit II of cytochrome c oxidase, which is the terminal member of the mitochondrial inner membrane electron transport chain; one of three mitochondrially-encoded subunits, Location: 32	AGTCTTAATAGCTCAATGGTAGAGCAGTGCACTGTTAATGCATTGATCCTAGTTCAATTC	CAF0007359	CaalfMp01	COX2		Ca19-mtDNA	Subunit II of cytochrome c oxidase, which is the terminal member of the mitochondrial inner membrane electron transport chain; one of three mitochondrially-encoded subunits	CAF0007359	GO:0006123|GO:0005507|GO:0004129|GO:0009055|GO:0016021|GO:0005751|GO:0020037	GO:0005507=copper ion binding|GO:0004129=cytochrome-c oxidase activity|GO:0009055=electron carrier activity|GO:0020037=heme binding	GO:0016021=integral to membrane|GO:0005751=mitochondrial respiratory chain complex IV	GO:0006123=mitochondrial electron transport, cytochrome c to oxygen	GO:0004129|GO:0005507|GO:0020037|GO:0009055|GO:0004129|GO:0005507|GO:0020037|GO:0009055|GO:0006123|GO:0006123|GO:0005751|GO:0016021|GO:0005751|GO:0016021
CAF0007361	-0.00321102	Detected	0.00321102	Detected	0	1.0335	Detected	-0.00856352	Detected	0.51247	0.429035	24.6779	24.391	61.0115	23.7158	CAF0007361	CAF0007361	CAF0007361 (alignment of 60bp with 100.00% identity) , Description: Subunit 6 of NADH:ubiquinone oxidoreductase (NADH:ubiquinone dehydrogenase), a multisubunit enzyme complex (complex I) of the mitochondrial inner membrane that catalyzes the first step i	GTCATTATAGGTATTATCCTTATTGTATCTGTTATAGGGGCTATCGCTATGACTCGTTAA	CAF0007361	CaalfMp02	NAD6		Ca19-mtDNA	Subunit 6 of NADH:ubiquinone oxidoreductase (NADH:ubiquinone dehydrogenase), a multisubunit enzyme complex (complex I) of the mitochondrial inner membrane that catalyzes the first step in mitochondrial respiration	CAF0007361	GO:0005747|GO:0006120|GO:0008137	GO:0008137=NADH dehydrogenase (ubiquinone) activity	GO:0005747=mitochondrial respiratory chain complex I	GO:0006120=mitochondrial electron transport, NADH to ubiquinone	GO:0008137|GO:0008137|GO:0006120|GO:0006120|GO:0005747|GO:0005747
CAF0007362	-0.0988483	Compromised	0.0988483	Compromised	0	0.161297	Compromised	0.546312	Compromised	0.353805	0.243686	2.7278	3.07831	3.93681	4.11496	CAF0007362	CAF0007362	CAF0007362 (alignment of 60bp with 100.00% identity) , Description: Subunit 6 of NADH:ubiquinone oxidoreductase (NADH:ubiquinone dehydrogenase), a multisubunit enzyme complex (complex I) of the mitochondrial inner membrane that catalyzes the first step i	CCTGCGTATTTATATGCCTTAGATGCGATAATTATTCTTTATAGGCCCGGAGGCCTATAG	CAF0007362	CaalfMp03	NAD1		Ca19-mtDNA	Subunit 6 of NADH:ubiquinone oxidoreductase (NADH:ubiquinone dehydrogenase), a multisubunit enzyme complex (complex I) of the mitochondrial inner membrane that catalyzes the first step in mitochondrial respiration	CAF0007362	GO:0005747|GO:0006120|GO:0008137	GO:0008137=NADH dehydrogenase (ubiquinone) activity	GO:0005747=mitochondrial respiratory chain complex I	GO:0006120=mitochondrial electron transport, NADH to ubiquinone	GO:0008137|GO:0008137|GO:0006120|GO:0006120|GO:0005747|GO:0005747
CAF0007363	0.00198174	Compromised	-0.00198174	Compromised	0	0.0712709	Compromised	0.449409	Compromised	0.26034	0.302414	3.09832	3.04033	3.91746	4.07527	CAF0007363	CAF0007363	CAF0007363 (alignment of 60bp with 100.00% identity) , Description: Subunit III of cytochrome c oxidase, which is the terminal member of the mitochondrial inner membrane electron transport chain; identical to Cox3Bp; one of three mitochondrially-encoded	GTACTTGACGTGTATATAATTATGATTTCACTAATACAAGTCATGTAGGTGCGGAGACAA	CAF0007363	CaalfMp04	COX3A		Ca19-mtDNA	Subunit III of cytochrome c oxidase, which is the terminal member of the mitochondrial inner membrane electron transport chain; identical to Cox3Bp; one of three mitochondrially-encoded subunits	CAF0007363	GO:0006123|GO:0004129|GO:0005751	GO:0004129=cytochrome-c oxidase activity	GO:0005751=mitochondrial respiratory chain complex IV	GO:0006123=mitochondrial electron transport, cytochrome c to oxygen	GO:0004129|GO:0004129|GO:0006123|GO:0006123|GO:0005751|GO:0005751
CAF0007370	-0.332765	Detected	0.332765	Detected	-2.38419e-07	0.00233269	Detected	-0.172182	Detected	-0.0849245	0.828042	203.683	317.898	309.636	219.602	CAF0007370	CAF0007370	CAF0007370 (alignment of 60bp with 100.00% identity) , Description: Subunit 9 of the F0 sector of mitochondrial F1F0 ATP synthase, which is a large, evolutionarily conserved enzyme complex required for ATP synthesis, Location: Complement (12699..12469) i	CTATCTTAGGTTTCGCTTTAAGTGAGGCTTGTGGATTATTCTGTTTAATGATCTCATTCT	CAF0007370	CaalfMp05	ATP9		Ca19-mtDNA	Subunit 9 of the F0 sector of mitochondrial F1F0 ATP synthase, which is a large, evolutionarily conserved enzyme complex required for ATP synthesis	CAF0007370	GO:0015986|GO:0046933|GO:0015991|GO:0000276	GO:0046933=hydrogen ion transporting ATP synthase activity, rotational mechanism	GO:0000276=mitochondrial proton-transporting ATP synthase complex, coupling factor F(o)	GO:0015986=ATP synthesis coupled proton transport|GO:0015991=ATP hydrolysis coupled proton transport	GO:0046933|GO:0046933|GO:0015986|GO:0015991|GO:0015986|GO:0015991|GO:0000276|GO:0000276
CAF0007372	0.268631	Compromised	-0.268632	Compromised	-4.76837e-07	0.171125	Compromised	-0.0297537	Compromised	0.0706859	0.828307	5.47547	3.71259	6.16723	4.29476	CAF0007372	CAF0007372	CAF0007372 (alignment of 60bp with 100.00% identity) , Description: Subunit 6 of the F0 sector of mitochondrial F1F0 ATP synthase, which is a large, evolutionarily conserved enzyme complex required for ATP synthesis, Location: Complement (13635..12895) i	TCGGAGGTATTGTACCAATAGTGGCTGTTATTGCTATTACTATCTTAGAAGTAGGTATTG	CAF0007372	CaalfMp06	ATP6		Ca19-mtDNA	Subunit 6 of the F0 sector of mitochondrial F1F0 ATP synthase, which is a large, evolutionarily conserved enzyme complex required for ATP synthesis	CAF0007372	GO:0015986|GO:0046933|GO:0000276	GO:0046933=hydrogen ion transporting ATP synthase activity, rotational mechanism	GO:0000276=mitochondrial proton-transporting ATP synthase complex, coupling factor F(o)	GO:0015986=ATP synthesis coupled proton transport	GO:0046933|GO:0046933|GO:0015986|GO:0015986|GO:0000276|GO:0000276
CAF0007373	-0.0984373	Compromised	0.0984364	Compromised	-4.76837e-07	0.179968	Compromised	0.576344	Compromised	0.378156	0.229597	2.62938	2.96555	3.84311	4.04877	CAF0007373	CAF0007373	CAF0007373 (alignment of 60bp with 100.00% identity) , Description: Subunit 8 of the F0 sector of mitochondrial F1F0 ATP synthase, which is a large, evolutionarily conserved enzyme complex required for ATP synthesis, Location: Complement (13906..13760) i	ATAATATTACCAAATGTATTACGTTTATTAGTAGCTAGAGCTATAATAGTACGTGTATAG	CAF0007373	CaalfMp07	ATP8		Ca19-mtDNA	Subunit 8 of the F0 sector of mitochondrial F1F0 ATP synthase, which is a large, evolutionarily conserved enzyme complex required for ATP synthesis	CAF0007373	GO:0015986|GO:0046933|GO:0000276	GO:0046933=hydrogen ion transporting ATP synthase activity, rotational mechanism	GO:0000276=mitochondrial proton-transporting ATP synthase complex, coupling factor F(o)	GO:0015986=ATP synthesis coupled proton transport	GO:0046933|GO:0046933|GO:0015986|GO:0015986|GO:0000276|GO:0000276
CAF0007377	0.142449	Detected	-0.142449	Detected	0	-0.121206	Detected	0.050055	Detected	-0.0355754	0.850352	313.633	253.307	314.829	283.759	CAF0007377	CAF0007377	CAF0007377 (alignment of 60bp with 100.00% identity) , Description: Subunit I of cytochrome c oxidase, which is the terminal member of the mitochondrial (mt) inner membrane electron transport chain; one of three mt-encoded subunits; alternatively spliced	GTGTATTAGTTCAATTAACAAATGGTGAGAATGAGCGTGAAGAAATACAAGTAACACCTG	CAF0007377	CaalfMp08	COX1		Ca19-mtDNA	Subunit I of cytochrome c oxidase, which is the terminal member of the mitochondrial (mt) inner membrane electron transport chain; one of three mt-encoded subunits; alternatively spliced transcripts encode 4 putative splicing endonucleases	CAF0007377	GO:0006123|GO:0004129|GO:0009055|GO:0016021|GO:0005751|GO:0020037	GO:0004129=cytochrome-c oxidase activity|GO:0009055=electron carrier activity|GO:0020037=heme binding	GO:0016021=integral to membrane|GO:0005751=mitochondrial respiratory chain complex IV	GO:0006123=mitochondrial electron transport, cytochrome c to oxygen	GO:0004129|GO:0020037|GO:0009055|GO:0004129|GO:0020037|GO:0009055|GO:0006123|GO:0006123|GO:0005751|GO:0016021|GO:0005751|GO:0016021
CAL0122211	0.0948029	Compromised	-0.0948029	Compromised	0	0.163231	Compromised	0.51265	Compromised	0.33794	0.23121	9.07025	7.82581	11.4614	11.6881	CAL0122211	CAL0122211	CAL0122211 (alignment of 60bp with 100.00% identity) , Description: Putative endonuclease encoded by the first exon and part of the first intron of the mitochondrial COX1 orf; C-terminus contains a LAGLIDADG domain found in intron-encoded endonucleases;	CTTATCTTGAAAATTCATAACGCTAAACCCCACTTATGTGGGGTTGACCCTTATGTATAA	CAL0122211	CaalfMp08.1			Ca19-mtDNA	Putative endonuclease encoded by the first exon and part of the first intron of the mitochondrial COX1 gene; C-terminus contains a LAGLIDADG domain found in intron-encoded endonucleases; conserved in fungal mitochondria	CAL0122211	GO:0009060|GO:0004519|GO:0004129|GO:0009055|GO:0016021|GO:0003677|GO:0006314|GO:0020037	GO:0004519=endonuclease activity|GO:0004129=cytochrome-c oxidase activity|GO:0009055=electron carrier activity|GO:0003677=DNA binding|GO:0020037=heme binding	GO:0016021=integral to membrane	GO:0009060=aerobic respiration|GO:0006314=intron homing	GO:0003677|GO:0004519|GO:0020037|GO:0009055|GO:0004129|GO:0006314|GO:0009060|GO:0016021
CAL0122212	-0.19989	Detected	0.19989	Detected	0	0.220581	Detected	0.0820389	Detected	0.15131	0.548688	35.2603	45.7741	56.8698	41.352	CAL0122212	CAL0122212	CAL0122212 (alignment of 60bp with 100.00% identity) , Description: Putative endonuclease encoded by the first two exons and part of the second intron of the mitochondrial COX1 orf; C-terminus contains a LAGLIDADG domain found in intron-encoded endonucle	ATATTGGGTTTATTTAGTAAAGAGATGTTACACCGGCCCCAGGATAGCAAAGCTATCATG	CAL0122212	CaalfMp08.2			Ca19-mtDNA	Putative endonuclease encoded by the first two exons and part of the second intron of the mitochondrial COX1 gene; C-terminus contains a LAGLIDADG domain found in intron-encoded endonucleases; conserved in fungal mitochondria	CAL0122212	GO:0009060|GO:0004519|GO:0004129|GO:0009055|GO:0016021|GO:0003677|GO:0006314|GO:0020037	GO:0004519=endonuclease activity|GO:0004129=cytochrome-c oxidase activity|GO:0009055=electron carrier activity|GO:0003677=DNA binding|GO:0020037=heme binding	GO:0016021=integral to membrane	GO:0009060=aerobic respiration|GO:0006314=intron homing	GO:0004129|GO:0003677|GO:0004519|GO:0020037|GO:0009055|GO:0006314|GO:0009060|GO:0016021
CAL0122217	-0.0289893	Detected	0.0289893	Detected	0	0.16963	Detected	0.297147	Detected	0.233389	0.0794715	102.378	104.869	141.585	123.801	CAL0122217	CAL0122217	CAL0122217 (alignment of 60bp with 100.00% identity) , Description: Putative endonuclease encoded by the first three exons and part of the third intron of the mitochondrial COX1 orf; C-terminus contains a LAGLIDADG domain found in intron-encoded endonucl	ATACGGTTTGTTCCGGGGAATAACGGATCTTATAGGTGAGACATATCACGTTATATAGAT	CAL0122217	CaalfMp08.3			Ca19-mtDNA	Putative endonuclease encoded by the first three exons and part of the third intron of the mitochondrial COX1 gene; C-terminus contains a LAGLIDADG domain found in intron-encoded endonucleases; conserved in fungal mitochondria	CAL0122217	GO:0009060|GO:0004129|GO:0009055|GO:0016021|GO:0003677|GO:0020037	GO:0004129=cytochrome-c oxidase activity|GO:0009055=electron carrier activity|GO:0003677=DNA binding|GO:0020037=heme binding	GO:0016021=integral to membrane	GO:0009060=aerobic respiration	GO:0009055|GO:0003677|GO:0020037|GO:0004129|GO:0009060|GO:0016021
CAL0122223	-0.0109916	Detected	0.0109916	Detected	0	-0.141684	Detected	-0.131962	Detected	-0.136823	0.0076277	55.8308	55.7801	61.4543	49.5221	CAL0122223	CAL0122223	CAL0122223 (alignment of 60bp with 100.00% identity) , Description: Putative endonuclease encoded by the first four exons and part of the fourth intron of the mitochondrial COX1 orf; C-terminus contains a LAGLIDADG domain found in intron-encoded endonucl	AACCACATCTCAACATATGGCCTCCTCGGTCATAATAGTATTCACTTTATTAATTTCGTT	CAL0122223	CaalfMp08.4			Ca19-mtDNA	Putative endonuclease encoded by the first four exons and part of the fourth intron of the mitochondrial COX1 gene; C-terminus contains a LAGLIDADG domain found in intron-encoded endonucleases; conserved in fungal mitochondria	CAL0122223	GO:0009060|GO:0004519|GO:0004129|GO:0009055|GO:0016021|GO:0003677|GO:0006314|GO:0020037	GO:0004519=endonuclease activity|GO:0004129=cytochrome-c oxidase activity|GO:0009055=electron carrier activity|GO:0003677=DNA binding|GO:0020037=heme binding	GO:0016021=integral to membrane	GO:0009060=aerobic respiration|GO:0006314=intron homing	GO:0003677|GO:0004519|GO:0020037|GO:0009055|GO:0004129|GO:0006314|GO:0009060|GO:0016021
CAF0007383	-0.309638	Compromised	0.309638	Detected	0	0.382693	Detected	-0.0349464	Compromised	0.173873	0.687308	11.2463	16.9988	21.9	13.1233	CAF0007383	CAF0007383	CAF0007383 (alignment of 60bp with 100.00% identity) , Description: Subunit 2 of NADH:ubiquinone oxidoreductase (NADH:ubiquinone dehydrogenase), a multisubunit enzyme complex (complex I) of the mitochondrial inner membrane that catalyzes the first step i	GTGGTATAGCCTCAGTACTTATATTATTATCATCAGCTGAAGTATATGAAGCTACAGGTT	CAF0007383	CaalfMp09	NAD2		Ca19-mtDNA	Subunit 2 of NADH:ubiquinone oxidoreductase (NADH:ubiquinone dehydrogenase), a multisubunit enzyme complex (complex I) of the mitochondrial inner membrane that catalyzes the first step in mitochondrial respiration	CAF0007383	GO:0005747|GO:0006120|GO:0008137	GO:0008137=NADH dehydrogenase (ubiquinone) activity	GO:0005747=mitochondrial respiratory chain complex I	GO:0006120=mitochondrial electron transport, NADH to ubiquinone	GO:0008137|GO:0008137|GO:0006120|GO:0006120|GO:0005747|GO:0005747
CAF0007384	-0.812627	Compromised	0.812627	Compromised	0	-0.129769	Compromised	-0.157615	Compromised	-0.143692	0.87595	2.73472	8.30138	5.29047	4.15367	CAF0007384	CAF0007384	CAF0007384 (alignment of 60bp with 100.00% identity) , Description: Subunit 3 of NADH:ubiquinone oxidoreductase (NADH:ubiquinone dehydrogenase), a multisubunit enzyme complex (complex I) of the mitochondrial inner membrane that catalyzes the first step i	GGATTTACTTCATATCAACAATCACGTGCTGCATTTAGTGTAGCTTTCATATTAGTAGCT	CAF0007384	CaalfMp10	NAD3		Ca19-mtDNA	Subunit 3 of NADH:ubiquinone oxidoreductase (NADH:ubiquinone dehydrogenase), a multisubunit enzyme complex (complex I) of the mitochondrial inner membrane that catalyzes the first step in mitochondrial respiration	CAF0007384	GO:0005747|GO:0006120|GO:0008137	GO:0008137=NADH dehydrogenase (ubiquinone) activity	GO:0005747=mitochondrial respiratory chain complex I	GO:0006120=mitochondrial electron transport, NADH to ubiquinone	GO:0008137|GO:0008137|GO:0006120|GO:0006120|GO:0005747|GO:0005747
CAF0007385	-0.263208	Detected	0.263208	Detected	0	-0.0161247	Detected	0.283491	Detected	0.133683	0.702052	114.421	162.165	163.645	161.219	CAF0007385	CAF0007385	CAF0007385 (alignment of 60bp with 100.00% identity) , Description: Cytochrome b, mitochondrially encoded subunit of the ubiquinol-cytochrome c reductase complex (complex III) that catalyzes a step in the respiratory chain of the mitochondrial inner memb	GGTGGTGTTATCGCTATGTTCGGTGCTATACTTATATTATTAAGTCTACCTTATACTGAT	CAF0007385	CaalfMp11	COB		Ca19-mtDNA	Cytochrome b, mitochondrially encoded subunit of the ubiquinol-cytochrome c reductase complex (complex III) that catalyzes a step in the respiratory chain of the mitochondrial inner membrane	CAF0007385	GO:0005720|GO:0008121|GO:0006122|GO:0005750	GO:0008121=ubiquinol-cytochrome-c reductase activity	GO:0005720=nuclear heterochromatin|GO:0005750=mitochondrial respiratory chain complex III	GO:0006122=mitochondrial electron transport, ubiquinol to cytochrome c	GO:0008121|GO:0008121|GO:0008121|GO:0008121|GO:0006122|GO:0006122|GO:0006122|GO:0006122|GO:0005750|GO:0005720|GO:0005750|GO:0005720
CAL0122003	-0.033906	Detected	0.033906	Detected	0	-0.138887	Detected	0.0984545	Detected	-0.0202165	0.884943	248.924	256.724	278.923	263.179	CAL0122003	CAL0122003	CAL0122003 (alignment of 60bp with 100.00% identity) , Description: Putative endonuclease encoded by the first exon and part of the first intron of the mitochondrial COB orf; C-terminus contains a GIY-YIG domain found in intron-encoded endonucleases; con	CAAGCGGATAGTCCTAAAGGATATAAGCATTCAGAGGAAAGTATAGCTAAAATGAAGCTA	CAL0122003	CaalfMp11.1			Ca19-mtDNA	Putative endonuclease encoded by the first exon and part of the first intron of the mitochondrial COB gene; C-terminus contains a GIY-YIG domain found in intron-encoded endonucleases; conserved in fungal mitochondria	CAL0122003	GO:0005622|GO:0022904|GO:0006281|GO:0004519|GO:0016020|GO:0016491|GO:0009055	GO:0004519=endonuclease activity|GO:0016491=oxidoreductase activity|GO:0009055=electron carrier activity	GO:0005622=intracellular|GO:0016020=membrane	GO:0022904=respiratory electron transport chain|GO:0006281=DNA repair	GO:0004519|GO:0016491|GO:0009055|GO:0022904|GO:0006281|GO:0005622|GO:0016020
CAF0007388	-2.05008	Compromised	2.05008	Detected	-4.76837e-07	-1.86836	Compromised	-1.41622	Compromised	-1.64229	0.509381	4.88873	82.5	6.6822	7.31724	CAF0007388	CAF0007388	CAF0007388 (alignment of 60bp with 100.00% identity) , Description: Subunit 4L of NADH:ubiquinone oxidoreductase (NADH:ubiquinone dehydrogenase), a multisubunit enzyme complex (complex I) of the mitochondrial inner membrane that catalyzes the first step	GCTATCGGTCTAAGTATATTAGTTGCTTATTATCGTTTAAGAGGTACTATCGGACATAGT	CAF0007388	CaalfMp12	NAD4L		Ca19-mtDNA	Subunit 4L of NADH:ubiquinone oxidoreductase (NADH:ubiquinone dehydrogenase), a multisubunit enzyme complex (complex I) of the mitochondrial inner membrane that catalyzes the first step in mitochondrial respiration	CAF0007388	GO:0005747|GO:0006120|GO:0008137	GO:0008137=NADH dehydrogenase (ubiquinone) activity	GO:0005747=mitochondrial respiratory chain complex I	GO:0006120=mitochondrial electron transport, NADH to ubiquinone	GO:0008137|GO:0008137|GO:0006120|GO:0006120|GO:0005747|GO:0005747
CAF0007389	-0.10292	Compromised	0.10292	Compromised	0	0.156105	Compromised	0.53798	Compromised	0.347043	0.250743	2.81987	3.20023	4.06653	4.24131	CAF0007389	CAF0007389	CAF0007389 (alignment of 60bp with 100.00% identity) , Description: Subunit 5 of NADH:ubiquinone oxidoreductase (NADH:ubiquinone dehydrogenase), a multisubunit enzyme complex (complex I) of the mitochondrial inner membrane that catalyzes the first step i	GAATGCATATATAGATCAAGGTTTACTTAAGGTATTAGGTTCTACTGGTGTAAGTAGAGC	CAF0007389	CaalfMp13	NAD5		Ca19-mtDNA	Subunit 5 of NADH:ubiquinone oxidoreductase (NADH:ubiquinone dehydrogenase), a multisubunit enzyme complex (complex I) of the mitochondrial inner membrane that catalyzes the first step in mitochondrial respiration	CAF0007389	GO:0005747|GO:0006120|GO:0008137	GO:0008137=NADH dehydrogenase (ubiquinone) activity	GO:0005747=mitochondrial respiratory chain complex I	GO:0006120=mitochondrial electron transport, NADH to ubiquinone	GO:0008137|GO:0008137|GO:0006120|GO:0006120|GO:0005747|GO:0005747
CAF0007395	-0.722927	Compromised	0.722927	Detected	0	-0.944567	Compromised	1.74922	Detected	0.402326	0.817037	7.38639	19.8	7.63366	39.5333	CAF0007395	CAF0007395	CAF0007395 (alignment of 60bp with 100.00% identity) , Description: Subunit 4 of NADH:ubiquinone oxidoreductase (NADH:ubiquinone dehydrogenase), a multisubunit enzyme complex (complex I) of the mitochondrial inner membrane that catalyzes the first step i	CTGGTGGTATACGTACACCTTATACTGCATTAACTAGTGATTGTACATATCGTGAGAGTT	CAF0007395	CaalfMp14	NAD4		Ca19-mtDNA	Subunit 4 of NADH:ubiquinone oxidoreductase (NADH:ubiquinone dehydrogenase), a multisubunit enzyme complex (complex I) of the mitochondrial inner membrane that catalyzes the first step in mitochondrial respiration	CAF0007395	GO:0005747|GO:0006120|GO:0008137	GO:0008137=NADH dehydrogenase (ubiquinone) activity	GO:0005747=mitochondrial respiratory chain complex I	GO:0006120=mitochondrial electron transport, NADH to ubiquinone	GO:0008137|GO:0008137|GO:0006120|GO:0006120|GO:0005747|GO:0005747
CAL0000502	-0.381484	Detected	0.381484	Detected	0	2.35439	Detected	2.0325	Detected	2.19344	0.0338341	1129.96	1886.8	9071.13	5808.76	CAL0000502	CAL0000502	CAL0000502 (alignment of 60bp with 100.00% identity) , Description: Alkane-inducible cytochrome P450; catalyzes hydroxylation of lauric acid to hydroxylauric acid; overproduction causes fluconazole resistance in a wild-type background and causes multidru	CTCCAGCTAAGTTGACTCATTTAACAATGTGTATGTTTGATGGTGTTCCTATTAAAGTTG	CAL0000502	orf19.10	ALK8	orf19.7683|IPF27231.1|IPF11568.1|orf6.1706|Contig4-2506_0001|CA0651|CaO19.7683|CaO19.10|CAWG_02011	Ca21chrR_C_albicans_SC5314	Alkane-inducible cytochrome P450; catalyzes hydroxylation of lauric acid to hydroxylauric acid; overproduction causes fluconazole resistance in a wild-type background and causes multidrug resistance in a cdr1 cdr2 double mutant background	CAL0000502	GO:0010430|GO:0019825|GO:0018685|GO:0009055|GO:0016712|GO:0030176|GO:0048252|GO:0020037	GO:0019825=oxygen binding|GO:0018685=alkane 1-monooxygenase activity|GO:0009055=electron carrier activity|GO:0016712=oxidoreductase activity, acting on paired donors, with incorporation or reduction of molecular oxygen, reduced flavin or flavoprotein as one donor, and incorporation of one atom of oxygen|GO:0020037=heme binding	GO:0030176=integral to endoplasmic reticulum membrane	GO:0010430=fatty acid omega-oxidation|GO:0048252=lauric acid metabolic process	GO:0018685|GO:0020037|GO:0019825|GO:0016712|GO:0009055|GO:0018685|GO:0020037|GO:0019825|GO:0016712|GO:0009055|GO:0010430|GO:0048252|GO:0010430|GO:0048252|GO:0030176|GO:0030176
CAL0002961	-0.0567598	Detected	0.0567598	Detected	0	0.621809	Detected	0.527432	Detected	0.57462	0.0161035	603.993	642.972	1164.99	873.437	CAL0002961	CAL0002961	CAL0002961 (alignment of 60bp with 100.00% identity) , Description: Predicted ORF in Assemblies 19, 20 and 21, Location: Complement (195350..194298) in Candida albicans Ca21chr6, Gene: orf19.100 , :: Next best Hit, CAL0001073 (alignment of 16bp with 10	TGATGGATCCAATAATCAATGCATTGCCAAAGATTTCCCTTTTTTGATGTTTGAAAGACG	CAL0002961	orf19.100		orf19.7747|IPF10462.3|IPF29954.1|orf6.2503|orf6.490|Contig4-2197_0007|CA0093|IPF29954|IPF19980.repeat2|IPF10462.2|CaO19.100|CAWG_05261	Ca21chr6_C_albicans_SC5314	Hap43p-repressed gene; late-stage biofilm-induced	CAL0002961	GO:0006629|GO:0004806|GO:0005575	GO:0004806=triglyceride lipase activity	GO:0005575=cellular_component	GO:0006629=lipid metabolic process	GO:0004806|GO:0006629|GO:0005575
CAL0001015	-0.00816917	Detected	0.00816917	Detected	0	0.0441422	Detected	-0.960907	Detected	-0.458383	0.458023	220.942	219.879	276.087	110.107	CAL0001015	CAL0001015	CAL0001015 (alignment of 60bp with 100.00% identity) , Description: Predicted ORF in Assemblies 19, 20 and 21; possibly spurious ORF (Annotation Working Group prediction), Location: Complement (2339580..2337688) in Candida albicans Ca21chr1, Gene: orf19	GAGTCAGCTTCTATAGATGTTGTTATTCTGCAAGAAGATACATGTATTACTCAAAAACCC	CAL0001015	orf19.1002		orf19.8618|IPF26289.1|IPF15371.2|CA3517|orf6.5795|CaO19.8618|LPF8|CaO19.1002|IFA22|CAWG_00377	Ca21chr1_C_albicans_SC5314	Hap43p-repressed gene	CAL0001015	GO:0008150|GO:0003674|GO:0005575	GO:0003674=molecular_function	GO:0005575=cellular_component	GO:0008150=biological_process	GO:0003674|GO:0003674|GO:0008150|GO:0008150|GO:0005575|GO:0005575
CAL0001021	-0.100013	Compromised	0.100013	Compromised	0	0.202408	Compromised	0.560879	Compromised	0.381643	0.204059	2.63593	2.97945	3.91736	4.01997	CAL0001021	CAL0001021	CAL0001021 (alignment of 60bp with 100.00% identity) , Description: Predicted ORF in Assemblies 19, 20 and 21; transcription is upregulated in both intermediate and mature biofilms, Location: Complement (2342386..2340578) in Candida albicans Ca21chr1, G	CCTTAGTTGATGCAAAGAAAAAATTACTTAATTTGGAACACAATGGTAACGACCACCAGT	CAL0001021	orf19.1005		orf19.8619|IPF19532.1|IPF18326.1|IPF15368.2|Contig4-1962_0003|CA6182|orf6.5794|orf6.581|orf19.1003|CaO19.1005|LPF10|CAWG_00376	Ca21chr1_C_albicans_SC5314	Predicted ORF in Assemblies 19, 20 and 21; transcription is upregulated in both intermediate and mature biofilms	CAL0001021	GO:0008150|GO:0003674|GO:0005575	GO:0003674=molecular_function	GO:0005575=cellular_component	GO:0008150=biological_process	GO:0003674|GO:0003674|GO:0008150|GO:0008150|GO:0005575|GO:0005575
CAL0001024	0.0211768	Detected	-0.0211768	Detected	0	-0.297576	Detected	-0.182919	Detected	-0.240248	0.0590382	5624.94	5374.72	5434.81	4709.99	CAL0001024	CAL0001024	CAL0001024 (alignment of 60bp with 100.00% identity) , Description: Putative transcription factor with bZIP DNA-binding motif, Location: Complement (1136506..1135448) in Candida albicans Ca21chrR, Gene: orf19.1007 , :: Next best Hit, CAL0002387 (alignme	CCTTTTGATATCGAATATCCGGAATATACCCCAGAAGAAGACGAAGGACTTTCAGAGTAA	CAL0001024	orf19.1007	KCS1	orf19.8622|IPF26283.1|IPF3746.1|Contig4-3028_0026|CA0133|orf6.613|KCS1|CaO19.1007|CaO19.8622|IPF3746|CAWG_01855	Ca21chrR_C_albicans_SC5314	Putative transcription factor with bZIP DNA-binding motif	CAL0001024	GO:0006355|GO:0000827|GO:0008440|GO:0003700|GO:0032958|GO:0000829|GO:0000828|GO:0005829	GO:0000827=inositol-1,3,4,5,6-pentakisphosphate kinase activity|GO:0008440=inositol-1,4,5-trisphosphate 3-kinase activity|GO:0003700=sequence-specific DNA binding transcription factor activity|GO:0000829=inositol heptakisphosphate kinase activity|GO:0000828=inositol hexakisphosphate kinase activity	GO:0005829=cytosol	GO:0006355=regulation of transcription, DNA-dependent|GO:0032958=inositol phosphate biosynthetic process	GO:0003700|GO:0008440|GO:0000828|GO:0000827|GO:0000829|GO:0003700|GO:0008440|GO:0000828|GO:0000827|GO:0000829|GO:0006355|GO:0032958|GO:0006355|GO:0032958|GO:0005829|GO:0005829
CAL0001025	-0.10116	Compromised	0.10116	Compromised	0	0.168	Compromised	0.597123	Compromised	0.382562	0.248133	2.77244	3.13873	4.02632	4.33918	CAL0001025	CAL0001025	CAL0001025 (alignment of 60bp with 100.00% identity) , Description: Predicted ORF in Assemblies 19, 20 and 21, Location: 1136826..1137140 in Candida albicans Ca21chrR, Gene: orf19.1008 , :: Next best Hit, CAL0006080 (alignment of 14bp with 100.00% iden	TAATCATTCAAAATTCGGATACCGTGTCTATAGTATAAAGAGGATGTGTGATTATTTTTT	CAL0001025	orf19.1008		IPF29604.1|Contig4-3028_0025|orf6.612|CaO19.1008|CAWG_01856	Ca21chrR_C_albicans_SC5314	Ortholog of Candida albicans WO-1 : CAWG_01856
CAL0001026	-0.318614	Compromised	0.318613	Compromised	-4.76837e-07	-0.20009	Compromised	0.30031	Compromised	0.0501099	0.912867	3.60641	5.51935	4.71819	5.34234	CAL0001026	CAL0001026	CAL0001026 (alignment of 60bp with 100.00% identity) , Description: Predicted ORF in Assemblies 19, 20 and 21, Location: 1137127..1137447 in Candida albicans Ca21chrR, Gene: orf19.1009 , :: Next best Hit, CAL0005310 (alignment of 15bp with 100.00% iden	CTTTCACGTACCACATTCCCTTTTGGAATCCTTGCCAAAAAGTCAAACTTTAAAACTTAG	CAL0001026	orf19.1009		IPF26287.1|Contig4-3028_0022|Contig4-3028_0024|orf6.611|CaO19.1009|CAWG_01857	Ca21chrR_C_albicans_SC5314	Ortholog of Candida albicans WO-1 : CAWG_01857
CAL0002962	0.000500202	Detected	-0.000500202	Detected	0	0.613304	Detected	0.600831	Detected	0.607067	0.000106202	775.948	762.99	1429.96	1134.72	CAL0002962	CAL0002962	CAL0002962 (alignment of 60bp with 100.00% identity) , Description: Protein required for alkaline pH response via the RIM101 signaling pathway; ortholog of S. cerevisiae RIM9 and A. nidulans palI, Location: 195973..197013 in Candida albicans Ca21chr6, G	TCTAGACGTGGAAGCAGTCCACATGAGTTCATAGAATTACAAAATTTACGACCAGTATAA	CAL0002962	orf19.101	RIM9	orf19.7748|IPF20039.1|IPF10461.2|orf6.2504|orf6.491|Contig4-1178_0001|CA1150|CaO19.101|CAWG_05260	Ca21chr6_C_albicans_SC5314	Protein required for alkaline pH response via the RIM101 signaling pathway; ortholog of S. cerevisiae RIM9 and A. nidulans palI	CAL0002962	GO:0030437|GO:0071285|GO:0003674|GO:0036244|GO:0030447|GO:0036170|GO:0005575|GO:0071469|GO:0036177|GO:0036178|GO:0071467|GO:0009267	GO:0003674=molecular_function	GO:0005575=cellular_component	GO:0030437=ascospore formation|GO:0071285=cellular response to lithium ion|GO:0036244=cellular response to neutral pH|GO:0030447=filamentous growth|GO:0036170=filamentous growth of a population of unicellular organisms in response to starvation|GO:0071469=cellular response to alkalinity|GO:0036177=filamentous growth of a population of unicellular organisms in response to pH|GO:0036178=filamentous…	GO:0003674|GO:0071285|GO:0071469|GO:0071469|GO:0036177|GO:0036170|GO:0030447|GO:0009267|GO:0071467|GO:0036244|GO:0030447|GO:0030437|GO:0036178|GO:0005575
CAL0001040	-0.0686521	Detected	0.0686521	Detected	0	-0.0713968	Detected	-0.172623	Detected	-0.12201	0.288859	3899.08	4219.71	4689.83	3499.49	CAL0001040	CAL0001040	CAL0001040 (alignment of 60bp with 100.00% identity) , Description: Predicted ORF in Assemblies 19, 20 and 21, Location: Complement (1141357..1139375) in Candida albicans Ca21chrR, Gene: orf19.1011 , :: Next best Hit, CAL0006163 (alignment of 16bp with	GGACCAGGTATGATAAAAAGAATTGGGTATGATTTTGAATGGTTTCAATGGGAAGGAATG	CAL0001040	orf19.1011	MNN2	orf19.8625|IPF26282.1|IPF3740.1|Contig4-3028_0018|CA0951|orf6.2169|MNN21|CaO19.8625|CaO19.1011|MNN6|CAWG_01859	Ca21chrR_C_albicans_SC5314	Ortholog(s) have alpha-1,2-mannosyltransferase activity, role in protein glycosylation and Golgi apparatus localization	CAL0001040	GO:0005794|GO:0000026|GO:0006486	GO:0000026=alpha-1,2-mannosyltransferase activity	GO:0005794=Golgi apparatus	GO:0006486=protein glycosylation	GO:0000026|GO:0000026|GO:0006486|GO:0006486|GO:0005794|GO:0005794
CAL0001042	0.162677	Detected	-0.162677	Detected	0	-0.184825	Detected	-0.170691	Detected	-0.177758	0.388947	1134.99	891.328	1074.99	868.917	CAL0001042	CAL0001042	CAL0001042 (alignment of 60bp with 100.00% identity) , Description: Predicted ORF in Assemblies 19, 20 and 21, Location: 1142648..1143109 in Candida albicans Ca21chrR, Gene: orf19.1012 , :: Next best Hit, CAL0000446 (alignment of 20bp with 95.00% ident	GGATGAATTGTTGATTGATGGATATTTACAAGAAAGTTCGAAACGAGAAGTGTTGAAACG	CAL0001042	orf19.1012	APS1	orf19.8626|IPF26284.1|IPF3737.2|Contig4-3028_0013|CA0950|orf6.2168|APS1|CaO19.1012|CaO19.8626|IPF3737|CAWG_01860	Ca21chrR_C_albicans_SC5314	Ortholog(s) have clathrin binding activity, role in Golgi to vacuole transport, endosomal transport and AP-1 adaptor complex, cytosol, endosome, nucleus localization	CAL0001042	GO:0030121|GO:0030276|GO:0016197|GO:0008565|GO:0005634|GO:0006896|GO:0015031|GO:0005829|GO:0005768	GO:0030276=clathrin binding|GO:0008565=protein transporter activity	GO:0030121=AP-1 adaptor complex|GO:0005634=nucleus|GO:0005829=cytosol|GO:0005768=endosome	GO:0016197=endosomal transport|GO:0006896=Golgi to vacuole transport|GO:0015031=protein transport	GO:0008565|GO:0030276|GO:0008565|GO:0030276|GO:0015031|GO:0006896|GO:0016197|GO:0015031|GO:0006896|GO:0016197|GO:0005768|GO:0005634|GO:0005829|GO:0030121|GO:0005768|GO:0005634|GO:0005829|GO:0030121
CAL0002963	0.152603	Detected	-0.152603	Detected	0	-0.591449	Detected	-0.525342	Detected	-0.558395	0.0700716	524.572	417.75	377.437	316.275	CAL0002963	CAL0002963	CAL0002963 (alignment of 60bp with 100.00% identity) , Description: Predicted ORF in Assemblies 19, 20 and 21; possibly spurious ORF (Annotation Working Group prediction), Location: Complement (198335..197085) in Candida albicans Ca21chr6, Gene: orf19.1	CATCTTGTTTGCAACTTTGAGAAGAGTGTCTACTAATTTGCCATTGCAAAAAGCACAATT	CAL0002963	orf19.102	AEP1	orf19.7749|IPF17548.2|IPF10459.1|orf6.2505|orf6.492|Contig4-1178_0003|CA1151|CaO19.102|IPF10459|CAWG_05259	Ca21chr6_C_albicans_SC5314	Ortholog(s) have mitochondrion localization	CAL0002963	GO:0005739|GO:0008150|GO:0003674	GO:0003674=molecular_function	GO:0005739=mitochondrion	GO:0008150=biological_process	GO:0003674|GO:0008150|GO:0005739
CAL0001085	0.109944	Detected	-0.109944	Detected	0	-0.280476	Detected	-0.0255485	Detected	-0.153012	0.459297	7104.02	6002.04	6531.25	6238.17	CAL0001085	CAL0001085	CAL0001085 (alignment of 60bp with 100.00% identity) , Description: Predicted ORF in Assemblies 19, 20 and 21, Location: Complement (804068..803076) in Candida albicans Ca21chr1, Gene: orf19.1026 , :: Next best Hit, CAL0000438 (alignment of 16bp with 1	GTTGTTTTCGCTAAAAGTGAAAATGGTGCTGGTGATTTAATGTATCCTATTGATTGGCAA	CAL0001085	orf19.1026	CSL4	orf19.8628|IPF15779.2|IPF17757.1|Contig4-2078_0005|CA0142|orf6.512|orf6.647|CSL4|CaO19.1026|CAWG_01008	Ca21chr1_C_albicans_SC5314	Ortholog(s) have role in exonucleolytic trimming to generate mature 3'-end of 5.8S rRNA from tricistronic rRNA transcript (SSU-rRNA, 5.8S rRNA and LSU-rRNA), more	CAL0001085	GO:0003674|GO:0070481|GO:0034427|GO:0000177|GO:0000176|GO:0071038|GO:0071035|GO:0000467	GO:0003674=molecular_function	GO:0000177=cytoplasmic exosome (RNase complex)|GO:0000176=nuclear exosome (RNase complex)	GO:0070481=nuclear-transcribed mRNA catabolic process, non-stop decay|GO:0034427=nuclear-transcribed mRNA catabolic process, exonucleolytic, 3'-5'|GO:0071038=nuclear polyadenylation-dependent tRNA catabolic process|GO:0071035=nuclear polyadenylation-dependent rRNA catabolic process|GO:0000467=exonucleolytic trimming to generate mature 3'-end of 5.8S rRNA from tricistronic rRNA transcript (SSU-rRN…	GO:0003674|GO:0003674|GO:0071035|GO:0070481|GO:0034427|GO:0000467|GO:0071038|GO:0071035|GO:0070481|GO:0034427|GO:0000467|GO:0071038|GO:0000176|GO:0000177|GO:0000176|GO:0000177
CAL0120491	0.331475	Detected	-0.331475	Detected	0	-0.367919	Detected	-0.243988	Detected	-0.305953	0.460021	63.2376	39.3002	46.9307	40.934	CAL0120491	CAL0120491	CAL0120491 (alignment of 60bp with 100.00% identity) , Description: ORF added to Assembly 21 based on comparative genome analysis, Location: 804272..804541 in Candida albicans Ca21chr1, Gene: orf19.1026.1 , :: Next best Hit, CAL0003692 (alignment of 15	CACCAACAATAACATTAAAAGAATATGATAACGCATCGTGGGCTTCAACTACTTGTTTAG	CAL0120491	orf19.1026.1			Ca21chr1_C_albicans_SC5314	Ortholog of C. parapsilosis CDC317 : CPAR2_105090, Candida tenuis NRRL Y-1498 : CANTEDRAFT_106351, Debaryomyces hansenii CBS767 : DEHA2A09548g and Candida dubliniensis CD36 : CD36_03580	CAL0120491	GO:0008150|GO:0003674|GO:0005575	GO:0003674=molecular_function	GO:0005575=cellular_component	GO:0008150=biological_process	GO:0003674|GO:0008150|GO:0005575
CAL0001087	-0.0162983	Detected	0.0162983	Detected	0	0.309149	Detected	0.571904	Detected	0.440526	0.0796665	2659.39	2676.59	4015.8	3856.46	CAL0001087	CAL0001087	CAL0001087 (alignment of 60bp with 100.00% identity) , Description: Predicted ORF in Assemblies 19, 20 and 21, Location: Complement (799429..798251) in Candida albicans Ca21chr1, Gene: orf19.1028 , :: Next best Hit, CAL0005074 (alignment of 18bp with 1	CTGATTCGAAACAAAATTGTGAGACCAATAATACTACTACTACTGCTAGACAACCATCGA	CAL0001087	orf19.1028	ELA1	orf19.8630|IPF19583.2|IPF19582.1|Contig4-2010_0003|Contig4-2010_0005|CA1631|orf6.3223|orf6.411|ELA1|CaO19.1028|IPF19582|CAWG_01010	Ca21chr1_C_albicans_SC5314	Ortholog(s) have ubiquitin-protein ligase activity, role in protein ubiquitination involved in ubiquitin-dependent protein catabolic process and Cul3-RING ubiquitin ligase complex, elongin complex localization	CAL0001087	GO:0070449|GO:0006355|GO:0004842|GO:0042787|GO:0031463|GO:0016021	GO:0004842=ubiquitin-protein ligase activity	GO:0070449=elongin complex|GO:0031463=Cul3-RING ubiquitin ligase complex|GO:0016021=integral to membrane	GO:0006355=regulation of transcription, DNA-dependent|GO:0042787=protein ubiquitination involved in ubiquitin-dependent protein catabolic process	GO:0004842|GO:0004842|GO:0042787|GO:0006355|GO:0042787|GO:0006355|GO:0031463|GO:0070449|GO:0016021|GO:0031463|GO:0070449|GO:0016021
CAL0001088	-0.075336	Detected	0.075336	Detected	0	-0.497422	Detected	-0.397686	Detected	-0.447554	0.0384168	722.473	789.161	649.803	557.347	CAL0001088	CAL0001088	CAL0001088 (alignment of 60bp with 100.00% identity) , Description: Predicted ORF in Assemblies 19, 20 and 21, Location: 797227..798159 in Candida albicans Ca21chr1, Gene: orf19.1029 , :: Next best Hit, CAL0006374 (alignment of 29bp with 89.66% identit	GGTGGGTTTAAGAAGAAATTAGATGATACTTCATCTGGCCGATTATTGAAAAAGAGGAAA	CAL0001088	orf19.1029	RPP1	orf19.8631|IPF26259.1|IPF14315.2|Contig4-2010_0007|CA1630|orf6.3222|RPP1|CaO19.1029|CAWG_01011	Ca21chr1_C_albicans_SC5314	Ortholog(s) have ribonuclease MRP activity, ribonuclease P activity, role in intronic box C/D snoRNA processing, mRNA cleavage, rRNA processing, tRNA processing and nucleolar ribonuclease P complex, ribonuclease MRP complex localization	CAL0001088	GO:0006379|GO:0000171|GO:0000172|GO:0034965|GO:0004526|GO:0006364|GO:0005655|GO:0008033	GO:0000171=ribonuclease MRP activity|GO:0004526=ribonuclease P activity	GO:0000172=ribonuclease MRP complex|GO:0005655=nucleolar ribonuclease P complex	GO:0006379=mRNA cleavage|GO:0034965=intronic box C/D snoRNA processing|GO:0006364=rRNA processing|GO:0008033=tRNA processing	GO:0000171|GO:0004526|GO:0000171|GO:0004526|GO:0034965|GO:0006379|GO:0006364|GO:0008033|GO:0034965|GO:0006379|GO:0006364|GO:0008033|GO:0000172|GO:0005655|GO:0000172|GO:0005655
CAL0002964	-0.151113	Detected	0.151113	Detected	0	0.88599	Detected	0.770748	Detected	0.828369	0.0360667	40.7463	49.4372	100.765	74.4623	CAL0002964	CAL0002964	CAL0002964 (alignment of 60bp with 100.00% identity) , Description: Protein of unknown function; induced by alpha factor, Location: 198735..199112 in Candida albicans Ca21chr6, Gene: orf19.103 , :: Next best Hit, CAL0006072 (alignment of 16bp with 100.	ACTGGACAACTTTCAGTGGCTACTACAGAGAAATAAGAAATATATGCCATCAAGTAAGTT	CAL0002964	orf19.103	KAR5	orf19.7750|IPF10457.3|orf6.2506|Contig4-2013_0002|CA1152|CaO19.103|IPF10457|CA1195|orf6.2573|IPF17213.2|IPF10457.2	Ca21chr6_C_albicans_SC5314	Protein similar to S. cerevisiae Kar5p, involved in nuclear membrane fusion during karyogamy; induced by alpha factor	CAL0002964	GO:0005739|GO:0003674|GO:0000742|GO:0005789	GO:0003674=molecular_function	GO:0005739=mitochondrion|GO:0005789=endoplasmic reticulum membrane	GO:0000742=karyogamy involved in conjugation with cellular fusion	GO:0003674|GO:0000742|GO:0005789|GO:0005739
CAL0001110	0.0126557	Detected	-0.0126557	Detected	0	-1.87402	Detected	-0.222564	Detected	-1.04829	0.332025	66244.6	64049.8	21588.7	54285.3	CAL0001110	CAL0001110	CAL0001110 (alignment of 60bp with 100.00% identity) , Description: Predicted ORF in Assemblies 19, 20 and 21, Location: Complement (796893..795613) in Candida albicans Ca21chr1, Gene: orf19.1030 , :: Next best Hit, CAL0002397 (alignment of 18bp with 1	GGATCTCAAGCTTTGCCAGGTATTCCAGCTAATTCAGAATTGACTTTTGATATTAAATTG	CAL0001110	orf19.1030	FPR3	orf19.8632|IPF26252.1|IPF14314.2|Contig4-2064_0001|CA1629|orf6.3221|FPR3|CaO19.1030|NPI46|FKBP2|FKBP3|CAWG_01012	Ca21chr1_C_albicans_SC5314	Putative peptidyl-prolyl cis-trans isomerase	CAL0001110	GO:0006457|GO:0051598|GO:0005730|GO:0003755|GO:0005527	GO:0003755=peptidyl-prolyl cis-trans isomerase activity|GO:0005527=macrolide binding	GO:0005730=nucleolus	GO:0006457=protein folding|GO:0051598=meiotic recombination checkpoint	GO:0003755|GO:0005527|GO:0003755|GO:0005527|GO:0006457|GO:0051598|GO:0006457|GO:0051598|GO:0005730|GO:0005730
CAL0001116	-0.21479	Detected	0.21479	Detected	0	0.433719	Detected	0.508942	Detected	0.47133	0.163196	15692	20796.1	29642.9	24996.8	CAL0001116	CAL0001116	CAL0001116 (alignment of 60bp with 100.00% identity) , Description: Putative transcription factor involved in cell wall damage response, similar to S. cerevisiae Sko1p; mutation causes caspofungin sensitivity; induced by osmotic stress via Hog1p; transcr	CGGTTCCAACAAACGTTACATCAATTCCATCAACTATACCAACTACTTTAAATCCTACAT	CAL0001116	orf19.1032	SKO1	orf19.8634|IPF26249.1|IPF6153.2|Contig4-2301_0003|Contig4-2301_0004|CA1627|orf6.3219|CaO19.8634|CaO19.1032|SKO1.3f|SKO1.3|CAWG_01014	Ca21chr1_C_albicans_SC5314	bZIP domain transcription factor involved in cell wall damage response; represses the yeast-to-hypha transition; mutants are caspofungin sensitive; induced by osmotic stress via Hog1p; induced by Mnl1p under weak acid stress	CAL0001116	GO:0001103|GO:0001191|GO:0071280|GO:0030447|GO:0001133|GO:0061393|GO:0005634|GO:0033554|GO:0000122|GO:0043618|GO:0000978|GO:0051403|GO:0005829|GO:0001078|GO:0001077|GO:0044182|GO:0046983|GO:1900429|GO:0051019	GO:0001103=RNA polymerase II repressing transcription factor binding|GO:0001191=RNA polymerase II transcription factor binding transcription factor activity involved in negative regulation of transcription|GO:0001133=sequence-specific transcription regulatory region DNA binding RNA polymerase II transcription factor recruiting transcription factor activity|GO:0000978=RNA polymerase II core promot…	GO:0005634=nucleus|GO:0005829=cytosol	GO:0071280=cellular response to copper ion|GO:0030447=filamentous growth|GO:0061393=positive regulation of transcription from RNA polymerase II promoter in response to osmotic stress|GO:0033554=cellular response to stress|GO:0000122=negative regulation of transcription from RNA polymerase II promoter|GO:0043618=regulation of transcription from RNA polymerase II promoter in response to stress|GO:0…	GO:0046983|GO:0000978|GO:0051019|GO:0001133|GO:0001103|GO:0001077|GO:0001191|GO:0001078|GO:0046983|GO:0000978|GO:0051019|GO:0001133|GO:0001103|GO:0001077|GO:0001191|GO:0001078|GO:0051403|GO:0051403|GO:0033554|GO:0071280|GO:0000122|GO:0043618|GO:0061393|GO:0030447|GO:0044182|GO:1900429|GO:0051403|GO:0051403|GO:0033554|GO:0071280|GO:0000122|GO:0043618|GO:0061393|GO:0030447|GO:0044182|GO:1900429|GO:…
CAL0001120	-0.193728	Detected	0.193728	Detected	0	1.16735	Detected	0.0860281	Detected	0.626687	0.38912	4024.92	5180.62	12459.5	4713.17	CAL0001120	CAL0001120	CAL0001120 (alignment of 60bp with 100.00% identity) , Description: Predicted ORF in Assemblies 19, 20 and 21; caspofungin repressed, Location: 784529..785080 in Candida albicans Ca21chr1, Gene: orf19.1034 , :: Next best Hit, CAL0003450 (alignment of 1	TGGTACGGTACAACATGAACCAATTACCAGTGATCCACCTGCTCCCTGTGAACATATGAA	CAL0001120	orf19.1034		orf19.8636|IPF18786.2|IPF6156.1|Contig4-2952_0020|CA1625|orf6.3217|orf6.2323|CaO19.1034|IPF6156|CAWG_01016	Ca21chr1_C_albicans_SC5314	Hap43p-repressed gene; caspofungin repressed; biofilm- and planktonic growth-induced gene	CAL0001120	GO:0008150|GO:0005575|GO:0020037	GO:0020037=heme binding	GO:0005575=cellular_component	GO:0008150=biological_process	GO:0020037|GO:0020037|GO:0008150|GO:0008150|GO:0005575|GO:0005575
CAL0001122	-0.164996	Detected	0.164996	Detected	0	0.439742	Detected	0.637672	Detected	0.538707	0.107397	632.961	782.892	1159.96	1064.99	CAL0001122	CAL0001122	CAL0001122 (alignment of 60bp with 100.00% identity) , Description: Predicted zinc cluster protein involved in resistance to weak organic acids; has similarity to S. cerevisiae War1p, which is a transcription factor involved in the regulation of weak aci	GATGAGTTTTGGTCAAATTTGTTAAGTACGGACTCTACTGATCGTATCAATTTCACAAGT	CAL0001122	orf19.1035	WAR1	orf19.8637|IPF6159.2|IPF17784.3|Contig4-2952_0016|CA1038|orf6.2322|orf6.265|orf6.3216|CaO19.1035|IPF6159|CAWG_01017	Ca21chr1_C_albicans_SC5314	Zinc cluster transcription factor; plays a role in resistance to weak organic acids; required for yeast cell adherence to silicone substrate	CAL0001122	GO:0005739|GO:0006355|GO:0003700|GO:0006357|GO:1900189|GO:0044011|GO:0010811|GO:0071229|GO:0005634|GO:0008270	GO:0003700=sequence-specific DNA binding transcription factor activity|GO:0008270=zinc ion binding	GO:0005739=mitochondrion|GO:0005634=nucleus	GO:0006355=regulation of transcription, DNA-dependent|GO:0006357=regulation of transcription from RNA polymerase II promoter|GO:1900189=positive regulation of cell adhesion involved in single-species biofilm formation|GO:0044011=single-species biofilm formation on inanimate substrate|GO:0010811=positive regulation of cell-substrate adhesion|GO:0071229=cellular response to acid	GO:0003700|GO:0008270|GO:0003700|GO:0003700|GO:0008270|GO:0003700|GO:0044011|GO:0006357|GO:0006355|GO:0010811|GO:0071229|GO:1900189|GO:0044011|GO:0006357|GO:0006355|GO:0010811|GO:0071229|GO:1900189|GO:0005634|GO:0005739|GO:0005634|GO:0005739
CAL0001125	-0.0386529	Detected	0.0386529	Detected	0	0.751882	Detected	-0.450987	Detected	0.150447	0.826171	3670	3810	7650	2660	CAL0001125	CAL0001125	NOTE: Has potential for cross hybridization with other orfs; CAL0001125 (alignment 60 bp with 100 % identity) , Description: Predicted ORF in Assemblies 19, 20 and 21, Location: Complement (775845..774073) in Candida albicans Ca21chr1, Gene: orf19.1037 ,	GAAAGGTGAAGGTGATGAATTCGAAGGTGCATTTACAAGAAGTTTTTCATTATGTGAACA	CAL0001125	orf19.1037		orf19.8639|orf19.8640|IPF26266.1|IPF19718.1|IPF26258.1|IPF13751.2|Contig4-2664_0012|CA1036|CA1035|orf6.2320|orf6.2319|CaO19.1037|orf19.1038|CaO19.8639|IFI2.5f|CAWG_01019	Ca21chr1_C_albicans_SC5314	Ortholog of Candida tenuis NRRL Y-1498 : CANTEDRAFT_114303, Candida dubliniensis CD36 : CD36_03460, Pichia stipitis Pignal : PICST_63037 and Spathaspora passalidarum NRRL Y-27907 : SPAPADRAFT_136773	CAL0001125	GO:0008150|GO:0003674|GO:0005575	GO:0003674=molecular_function	GO:0005575=cellular_component	GO:0008150=biological_process	GO:0003674|GO:0008150|GO:0005575
CAL0001127	0.177616	Detected	-0.177616	Detected	0	-0.333924	Detected	0.0239916	Detected	-0.154966	0.601419	4210.82	3239.06	3559.58	3651.42	CAL0001127	CAL0001127	CAL0001127 (alignment of 60bp with 100.00% identity) , Description: Predicted ORF in Assemblies 19, 20 and 21, Location: Complement (857122..855932) in Candida albicans Ca21chr1, Gene: orf19.1039 , :: Next best Hit, CAL0002953 (alignment of 15bp with 1	GCTTCGGAAAAATAAATATTTAGATCAACTTGCCGGTAATGCCCCAATTTTTCACCATTA	CAL0001127	orf19.1039	BET4	orf19.8641|IPF17890.1|IPF29595.1|Contig4-2664_0010|CA1034|orf6.2318|BET4.3f|BET4.exon2|CAWG_00986	Ca21chr1_C_albicans_SC5314	Ortholog(s) have Rab geranylgeranyltransferase activity and role in ER to Golgi vesicle-mediated transport, protein geranylgeranylation, protein targeting to membrane	CAL0001127	GO:0006888|GO:0005968|GO:0018344|GO:0006612|GO:0005816|GO:0004663|GO:0005634|GO:0032153|GO:0005829	GO:0004663=Rab geranylgeranyltransferase activity	GO:0005968=Rab-protein geranylgeranyltransferase complex|GO:0005816=spindle pole body|GO:0005634=nucleus|GO:0032153=cell division site|GO:0005829=cytosol	GO:0006888=ER to Golgi vesicle-mediated transport|GO:0018344=protein geranylgeranylation|GO:0006612=protein targeting to membrane	GO:0004663|GO:0004663|GO:0006612|GO:0018344|GO:0006888|GO:0006612|GO:0018344|GO:0006888|GO:0005634|GO:0005829|GO:0005816|GO:0005968|GO:0032153|GO:0005634|GO:0005829|GO:0005816|GO:0005968|GO:0032153
CAL0002965	-0.164633	Detected	0.164633	Detected	0	1.04469	Detected	0.93993	Detected	0.992308	0.0289998	373.191	461.358	1039.9	774.067	CAL0002965	CAL0002965	CAL0002965 (alignment of 60bp with 100.00% identity) , Description: Predicted ORF in Assemblies 19, 20 and 21; possibly spurious ORF (Annotation Working Group prediction); transcription is induced in response to alpha pheromone in SpiderM medium, Locatio	ACGGGAATTGCATTAGCTATATTCATCTTAAGGCTCTTGAGTATGCCTATGAAAGTTGTT	CAL0002965	orf19.104		IPF17213.3|IPF10455.3|orf6.2507|Contig4-2013_0005|CA1153|IPF10455|IPF10455.2|CaO19.104|CAWG_05258	Ca21chr6_C_albicans_SC5314	Predicted ORF in Assemblies 19, 20 and 21; transcription is induced in response to alpha pheromone in SpiderM medium	CAL0002965	GO:0008150|GO:0003674|GO:0005575	GO:0003674=molecular_function	GO:0005575=cellular_component	GO:0008150=biological_process	GO:0003674|GO:0008150|GO:0005575
CAL0001147	0.0358353	Detected	-0.0358353	Detected	0	-0.349789	Detected	-0.442343	Detected	-0.396066	0.021148	554.222	518.915	511.235	383.777	CAL0001147	CAL0001147	CAL0001147 (alignment of 60bp with 100.00% identity) , Description: Protein required for the spindle assembly checkpoint of the cell cycle; necessary for survival in host cell macrophages and for virulence in a mouse model of systemic candidiasis, Locati	CTCAAGGTGATGGGAAGGTACTAGATGGTGATAATGTTGATAATGTGAAATTTACTTCAT	CAL0001147	orf19.1040	MAD2	orf19.8642|IPF17891.2|IPF17882.3|Contig4-2664_0009|CA1033|orf6.2122|orf6.2317|CaO19.1040|CAWG_00985	Ca21chr1_C_albicans_SC5314	Protein required for the spindle assembly checkpoint of the cell cycle; necessary for survival in host cell macrophages and for virulence in a mouse model of systemic candidiasis	CAL0001147	GO:0007094|GO:0044119|GO:0010997|GO:0060565|GO:0035690|GO:0000070|GO:0033597|GO:0005643|GO:0009405|GO:0070683|GO:0000776|GO:0034599|GO:0000778|GO:0051312	GO:0010997=anaphase-promoting complex binding	GO:0033597=mitotic checkpoint complex|GO:0005643=nuclear pore|GO:0000776=kinetochore|GO:0000778=condensed nuclear chromosome kinetochore	GO:0007094=mitotic cell cycle spindle assembly checkpoint|GO:0044119=growth of symbiont in host cell|GO:0060565=inhibition of mitotic anaphase-promoting complex activity|GO:0035690=cellular response to drug|GO:0000070=mitotic sister chromatid segregation|GO:0009405=pathogenesis|GO:0070683=mitotic cell cycle G2/M transition decatenation checkpoint|GO:0034599=cellular response to oxidative stress|G…	GO:0010997|GO:0010997|GO:0007094|GO:0000070|GO:0007094|GO:0009405|GO:0034599|GO:0035690|GO:0060565|GO:0051312|GO:0070683|GO:0044119|GO:0007094|GO:0000070|GO:0007094|GO:0009405|GO:0034599|GO:0035690|GO:0060565|GO:0051312|GO:0070683|GO:0044119|GO:0000776|GO:0033597|GO:0000778|GO:0005643|GO:0000776|GO:0033597|GO:0000778|GO:0005643
CAL0001150	0.12937	Detected	-0.12937	Detected	0	-0.127106	Detected	-0.0636158	Detected	-0.0953608	0.548364	719.685	591.89	726.033	607.279	CAL0001150	CAL0001150	CAL0001150 (alignment of 60bp with 100.00% identity) , Description: Predicted ORF in Assemblies 19, 20 and 21, Location: Complement (859468..857981) in Candida albicans Ca21chr1, Gene: orf19.1041 , :: Next best Hit, CAL0003000 (alignment of 18bp with 9	GATATAATGTCTACTCCATTAAGTTTGGTTGTACCTCCTCATTGTATTGCTTTGGCTATT	CAL0001150	orf19.1041	CTK2	orf19.8643|IPF26251.1|IPF17881.2|Contig4-2664_0008|CA0918|orf6.2123|CaO19.1041|IPF17881|CaO19.8643|CAWG_00984	Ca21chr1_C_albicans_SC5314	Ortholog(s) have cyclin-dependent protein kinase activity	CAL0001150	GO:0070816|GO:0031565|GO:0019901|GO:0031031|GO:0005730|GO:0000079|GO:0005829|GO:0045903|GO:0032786|GO:0032806|GO:0045943|GO:0005654|GO:0004693	GO:0019901=protein kinase binding|GO:0004693=cyclin-dependent protein kinase activity	GO:0005730=nucleolus|GO:0005829=cytosol|GO:0032806=carboxy-terminal domain protein kinase complex|GO:0005654=nucleoplasm	GO:0070816=phosphorylation of RNA polymerase II C-terminal domain|GO:0031565=cytokinesis checkpoint|GO:0031031=positive regulation of septation initiation signaling cascade|GO:0000079=regulation of cyclin-dependent protein kinase activity|GO:0045903=positive regulation of translational fidelity|GO:0032786=positive regulation of transcription elongation, DNA-dependent|GO:0045943=positive regulatio…	GO:0019901|GO:0004693|GO:0019901|GO:0004693|GO:0032786|GO:0070816|GO:0045943|GO:0031565|GO:0031031|GO:0045903|GO:0000079|GO:0032786|GO:0070816|GO:0045943|GO:0031565|GO:0031031|GO:0045903|GO:0000079|GO:0005654|GO:0005730|GO:0005829|GO:0032806|GO:0005654|GO:0005730|GO:0005829|GO:0032806
CAL0001151	0.0857286	Detected	-0.0857286	Detected	0	-0.132483	Detected	-0.0921354	Detected	-0.112309	0.33033	63347.6	55348.2	65623.9	54016.7	CAL0001151	CAL0001151	CAL0001151 (alignment of 60bp with 100.00% identity) , Description: Mitochondrial outer membrane porin; in detergent-resistant membrane fraction (possible lipid raft component); antigenic in human, mouse; flucytosine-, macrophage-, farnesol- induced; flu	GCCTTGAAATTGGCTGAACCAGTTCATAAATTAGGTTTCTCTTTGTCTTTTGCTGCTTAA	CAL0001151	orf19.1042	POR1	orf19.8644|IPF26262.1|IPF12994.2|Contig4-2664_0006|CA0919|orf6.2124|VDAC1|CaO19.1042|CAWG_00983	Ca21chr1_C_albicans_SC5314	Mitochondrial outer membrane porin; in detergent-resistant membrane fraction (possible lipid raft component); antigenic in human, mouse; Hap43p-induced; flucytosine-, macrophage-, farnesol- induced; fluconazole, caspofungin repressed	CAL0001151	GO:0006820|GO:0044070|GO:0016020|GO:0005886|GO:0051027|GO:0006915|GO:0045454|GO:0031307|GO:0007005|GO:0055085|GO:0008308|GO:0006811	GO:0008308=voltage-gated anion channel activity	GO:0016020=membrane|GO:0005886=plasma membrane|GO:0031307=integral to mitochondrial outer membrane	GO:0006820=anion transport|GO:0044070=regulation of anion transport|GO:0051027=DNA transport|GO:0006915=apoptotic process|GO:0045454=cell redox homeostasis|GO:0007005=mitochondrion organization|GO:0055085=transmembrane transport|GO:0006811=ion transport	GO:0008308|GO:0008308|GO:0051027|GO:0006811|GO:0007005|GO:0006915|GO:0045454|GO:0055085|GO:0006820|GO:0044070|GO:0051027|GO:0006811|GO:0007005|GO:0006915|GO:0045454|GO:0055085|GO:0006820|GO:0044070|GO:0005886|GO:0016020|GO:0031307|GO:0005886|GO:0016020|GO:0031307
CAL0001153	0.0939875	Detected	-0.0939875	Detected	0	0.752232	Detected	-0.00956392	Detected	0.371334	0.443798	275.457	237.934	523.873	247.299	CAL0001153	CAL0001153	CAL0001153 (alignment of 60bp with 100.00% identity) , Description: Predicted ORF in Assemblies 19, 20 and 21, Location: 862110..863027 in Candida albicans Ca21chr1, Gene: orf19.1043 , :: Next best Hit, CAL0006091 (alignment of 16bp with 100.00% identi	GAGATAAGGGAACGGGTATTTCTCCATTTATGCCTCAAAAATTACCAACATTTCAAAAGA	CAL0001153	orf19.1043	LOA1	orf19.8645|IPF26261.1|IPF12992.2|CA0921|orf6.2125|CaO19.1043|IPF12992|CaO19.8645|CAWG_00982	Ca21chr1_C_albicans_SC5314	Ortholog(s) have lysophosphatidic acid acyltransferase activity, role in cellular triglyceride homeostasis, lipid particle organization, protein targeting to vacuole and Golgi apparatus, endoplasmic reticulum, lipid particle localization	CAL0001153	GO:0005811|GO:0005794|GO:0042171|GO:0005783|GO:0006623|GO:0035356|GO:0034389	GO:0042171=lysophosphatidic acid acyltransferase activity	GO:0005811=lipid particle|GO:0005794=Golgi apparatus|GO:0005783=endoplasmic reticulum	GO:0006623=protein targeting to vacuole|GO:0035356=cellular triglyceride homeostasis|GO:0034389=lipid particle organization	GO:0042171|GO:0042171|GO:0035356|GO:0006623|GO:0034389|GO:0035356|GO:0006623|GO:0034389|GO:0005783|GO:0005794|GO:0005811|GO:0005783|GO:0005794|GO:0005811
CAL0001156	-0.0727682	Detected	0.0727682	Detected	0	-0.658141	Detected	-0.370325	Detected	-0.514233	0.085864	3504.82	3814.74	2814.96	2750.64	CAL0001156	CAL0001156	CAL0001156 (alignment of 60bp with 100.00% identity) , Description: Predicted ORF in Assemblies 19, 20 and 21; mutation confers hypersensitivity to 5-fluorocytosine (5-FC), 5-fluorouracil (5-FU), and tubercidin (7-deazaadenosine), Location: Complement (8	TCATCGCATAGATCGTCCCATCATAAATCAAAAGATCGTGAAAAAAGTCCTACTAGATAA	CAL0001156	orf19.1045	IST3	orf19.8647|IPF26260.1|IPF12991.1|Contig4-2647_0003|CA0922|orf6.2127|CaO19.8647|IST3|CaO19.1045|IPF12991|CAWG_00981	Ca21chr1_C_albicans_SC5314	Putative U2 snRNP protein; Hap43p-induced gene; mutation confers hypersensitivity to 5-fluorocytosine (5-FC), 5-fluorouracil (5-FU), and tubercidin (7-deazaadenosine)	CAL0001156	GO:0000245|GO:0000384|GO:0000349|GO:0006406|GO:0000166|GO:0003676|GO:0035690|GO:0070274|GO:0005686	GO:0000384=first spliceosomal transesterification activity|GO:0000166=nucleotide binding|GO:0003676=nucleic acid binding	GO:0070274=RES complex|GO:0005686=U2 snRNP	GO:0000245=spliceosomal complex assembly|GO:0000349=generation of catalytic spliceosome for first transesterification step|GO:0006406=mRNA export from nucleus|GO:0035690=cellular response to drug	GO:0003676|GO:0000166|GO:0000384|GO:0003676|GO:0000166|GO:0000384|GO:0035690|GO:0006406|GO:0000349|GO:0000245|GO:0035690|GO:0006406|GO:0000349|GO:0000245|GO:0005686|GO:0070274|GO:0005686|GO:0070274
CAL0001157	0.108443	Detected	-0.108443	Detected	0	-1.71423	Detected	-0.309012	Detected	-1.01162	0.290717	18899.7	16001.2	6438.69	13649.9	CAL0001157	CAL0001157	CAL0001157 (alignment of 60bp with 100.00% identity) , Description: Predicted ORF in Assemblies 19, 20 and 21; mutation confers hypersensitivity to 5-fluorocytosine (5-FC), 5-fluorouracil (5-FU), and tubercidin (7-deazaadenosine); hyphal repressed; macro	CCTAAAGAACCTTGGTTATTTAGTGCTGGTGCTGATGGAACTGCTCGTCTTTGGACTACA	CAL0001157	orf19.1047	ERB1	orf19.8649|IPF26243.1|IPF12987.2|Contig4-2647_0005|Contig4-2647_0006|CA0923|orf6.2129|CaO19.1047|IPF12987|CAWG_00980	Ca21chr1_C_albicans_SC5314	Protein with a predicted role in ribosomal large subunit biogenesis; mutation confers hypersensitivity to 5-fluorocytosine (5-FC), 5-fluorouracil (5-FU), and tubercidin (7-deazaadenosine); hyphal repressed; macrophage repressed	CAL0001157	GO:0070545|GO:0003674|GO:0006364|GO:0042273|GO:0030687|GO:0035690	GO:0003674=molecular_function	GO:0070545=PeBoW complex|GO:0030687=preribosome, large subunit precursor	GO:0006364=rRNA processing|GO:0042273=ribosomal large subunit biogenesis|GO:0035690=cellular response to drug	GO:0003674|GO:0003674|GO:0035690|GO:0006364|GO:0042273|GO:0035690|GO:0006364|GO:0042273|GO:0070545|GO:0030687|GO:0070545|GO:0030687
CAL0001159	0.109695	Detected	-0.109696	Detected	-2.38419e-07	-0.172019	Detected	-0.0731812	Detected	-0.1226	0.415405	158.474	133.938	157.1	134.663	CAL0001159	CAL0001159	CAL0001159 (alignment of 60bp with 100.00% identity) , Description: Predicted ORF in Assemblies 19, 20 and 21; expression upregulated during planktonic growth, Location: Complement (869162..868578) in Candida albicans Ca21chr1, Gene: orf19.1049 , :: Nex	GTGATAATGTTACCAGTCATCAACAACCAAGTATTGGAGGATTATATTTATTTACAGCCG	CAL0001159	orf19.1049		orf19.8651|IPF18855.2|IPF17050.1|Contig4-2647_0011|CA0925|orf6.2131|CaO19.1049|IPF17050|CaO19.8651|CAWG_00978	Ca21chr1_C_albicans_SC5314	Hap43p-induced gene; expression upregulated during planktonic growth	CAL0001159	GO:0008150|GO:0016787|GO:0005575	GO:0016787=hydrolase activity	GO:0005575=cellular_component	GO:0008150=biological_process	GO:0016787|GO:0016787|GO:0008150|GO:0008150|GO:0005575|GO:0005575
CAL0002967	0.0599828	Detected	-0.0599828	Detected	0	1.02653	Detected	0.792591	Detected	0.909562	0.020255	1169.83	1059.24	2754.89	1874.99	CAL0002967	CAL0002967	CAL0002967 (alignment of 60bp with 100.00% identity) , Description: Putative phosphoadenosine-5'-phosphate (PAP) or 3'-phosphoadenosine 5'-phosphosulfate (PAPS) phosphatase; possible role in sulfur recycling; induced upon biofilm formation, Location: 200	GCCGCCAACAAGGAGATATTTGATAAGGTTATAGATGCAGTTACTGAAGTGAGAAAGTGA	CAL0002967	orf19.105	HAL22	orf19.7752|IPF10454.1|Contig4-2013_0008|orf6.2508|orf6.2571|orf6.390|MET222|CA1154|MET22|CaO19.105|MET221|CA1194|IPF17216.2|CAWG_05257	Ca21chr6_C_albicans_SC5314	Putative phosphoadenosine-5'-phosphate (PAP) or 3'-phosphoadenosine 5'-phosphosulfate (PAPS) phosphatase; possible role in sulfur recycling; induced upon biofilm formation; Hap43p-repressed gene	CAL0002967	GO:0008150|GO:0003674|GO:0005575	GO:0003674=molecular_function	GO:0005575=cellular_component	GO:0008150=biological_process	GO:0003674|GO:0008150|GO:0005575
CAL0001180	-0.005867	Detected	0.005867	Detected	0	-0.321285	Detected	-0.0744782	Detected	-0.197881	0.250377	44.3692	44.0151	42.9687	40.8102	CAL0001180	CAL0001180	CAL0001180 (alignment of 60bp with 100.00% identity) , Description: Predicted ORF in Assemblies 19, 20 and 21; possibly spurious ORF (Annotation Working Group prediction), Location: Complement (870400..869498) in Candida albicans Ca21chr1, Gene: orf19.1	GCTTATCAGAATTGGAATTTAATAGAAATCATTGAGATTCCAACCATGGTTGTCCCAGAA	CAL0001180	orf19.1050	YMR087W	orf19.8652|IPF15638.2|IPF17051.3|Contig4-2647_0015|CA0841|orf6.2006|orf6.2132|CaO19.1050|IPF15638|CAWG_00977	Ca21chr1_C_albicans_SC5314	Ortholog of S. cerevisiae : YMR087W, C. glabrata CBS138 : CAGL0J01397g, C. parapsilosis CDC317 : CPAR2_107150, Candida dubliniensis CD36 : CD36_03920 and Pichia stipitis Pignal : PICST_61741	CAL0001180	GO:0008150|GO:0003674|GO:0005575	GO:0003674=molecular_function	GO:0005575=cellular_component	GO:0008150=biological_process	GO:0003674|GO:0003674|GO:0008150|GO:0008150|GO:0005575|GO:0005575
CAL0001183	0.0461216	Detected	-0.0461216	Detected	0	-0.840081	Detected	-0.115028	Detected	-0.477555	0.321345	32284.5	29799.8	21049.5	27849.9	CAL0001183	CAL0001183	CAL0001183 (alignment of 60bp with 100.00% identity) , Description: Protein described as histone H2A; farnesol regulated; transcription is downregulated in both intermediate and mature biofilms, Location: Complement (871141..870746) in Candida albicans	ATTCATCAATCATTATTACCAGCTAAGAAAGCTAAAGCAGGTGCCGCTTCTCAAGAATTG	CAL0001183	orf19.1051	HTA2	orf19.8653|IPF26275.1|IPF15637.2|Contig4-2647_0017|orf6.2007|CaO19.1051|CaO19.8653|CAWG_00976	Ca21chr1_C_albicans_SC5314	Putative histone H2A; farnesol regulated; transcription is downregulated in both intermediate and mature biofilms; Hap43p-induced	CAL0001183	GO:0006281|GO:0006334|GO:0031298|GO:0000122|GO:0000786|GO:0003677	GO:0003677=DNA binding	GO:0031298=replication fork protection complex|GO:0000786=nucleosome	GO:0006281=DNA repair|GO:0006334=nucleosome assembly|GO:0000122=negative regulation of transcription from RNA polymerase II promoter	GO:0003677|GO:0003677|GO:0006334|GO:0000122|GO:0006281|GO:0006334|GO:0000122|GO:0006281|GO:0000786|GO:0031298|GO:0000786|GO:0031298
CAL0001185	0.136059	Detected	-0.136059	Detected	0	-0.924694	Detected	-0.154146	Detected	-0.53942	0.317611	40492.1	32994.6	23392.3	31941.2	CAL0001185	CAL0001185	CAL0001185 (alignment of 60bp with 100.00% identity) , Description: Predicted histone H2B, Location: 872008..872400 in Candida albicans Ca21chr1, Gene: orf19.1052 , :: Next best Hit, CAL0005033 (alignment of 14bp with 100.00% identity) ,Description: Fu	AAACATGCTGTTTCTGAAGGTACTAGAGCTGTTACCAAATACTCTTCTGCTTCTAATTAA	CAL0001185	orf19.1052		orf19.8654|IPF26276.1|IPF15634.2|Contig4-2647_0021|orf6.2008|HTB2|CaO19.1052|CaO19.8654|CAWG_00975	Ca21chr1_C_albicans_SC5314	Predicted histone H2B; Hap43p-induced gene	CAL0001185	GO:0006334|GO:0005634|GO:0000786|GO:0003677	GO:0003677=DNA binding	GO:0005634=nucleus|GO:0000786=nucleosome	GO:0006334=nucleosome assembly	GO:0003677|GO:0003677|GO:0006334|GO:0006334|GO:0000786|GO:0005634|GO:0000786|GO:0005634
CAL0001187	0.0512862	Detected	-0.0512862	Detected	0	-0.0166068	Detected	-0.169119	Detected	-0.0928631	0.41863	1069.81	980.433	1229.96	885.727	CAL0001187	CAL0001187	CAL0001187 (alignment of 60bp with 100.00% identity) , Description: Predicted ORF in Assemblies 19, 20 and 21, Location: Complement (873841..872669) in Candida albicans Ca21chr1, Gene: orf19.1053 , :: Next best Hit, CAL0003698 (alignment of 16bp with 1	GCAATAATTCAATTACGTAAAGTATATACCAAATTTAACAACCCTCCACCCACACACTAG	CAL0001187	orf19.1053	BST1	orf19.8655|IPF26257.1|IPF15633.2|Contig4-2647_0022|CA0842|orf6.2009|CaO19.8655|BST1|CaO19.1053|IPF15633|CAWG_00974	Ca21chr1_C_albicans_SC5314	Ortholog(s) have phosphatidylinositol deacylase activity and role in ER to Golgi vesicle-mediated transport, ER-associated protein catabolic process, GPI anchor metabolic process, protein retention in ER lumen, vesicle organization	CAL0001187	GO:0006888|GO:0016050|GO:0005783|GO:0031227|GO:0050185|GO:0006621|GO:0030433|GO:0006886|GO:0006505	GO:0050185=phosphatidylinositol deacylase activity	GO:0005783=endoplasmic reticulum|GO:0031227=intrinsic to endoplasmic reticulum membrane	GO:0006888=ER to Golgi vesicle-mediated transport|GO:0016050=vesicle organization|GO:0006621=protein retention in ER lumen|GO:0030433=ER-associated protein catabolic process|GO:0006886=intracellular protein transport|GO:0006505=GPI anchor metabolic process	GO:0050185|GO:0050185|GO:0016050|GO:0030433|GO:0006888|GO:0006621|GO:0006505|GO:0006886|GO:0016050|GO:0030433|GO:0006888|GO:0006621|GO:0006505|GO:0006886|GO:0005783|GO:0031227|GO:0005783|GO:0031227
CAL0001188	0.223671	Detected	-0.223671	Detected	0	-0.167529	Detected	0.125534	Detected	-0.0209975	0.944559	1364.92	984.987	1254.19	1230	CAL0001188	CAL0001188	CAL0001188 (alignment of 60bp with 100.00% identity) , Description: Predicted ORF in Assemblies 19, 20 and 21; possibly spurious ORF (Annotation Working Group prediction), Location: Complement (875468..874659) in Candida albicans Ca21chr1, Gene: orf19.1	ACCATTGATCTGTTTAAATTGGTTCATGATCGAACCAAAGATGAAGATAAGGCCAAATGA	CAL0001188	orf19.1054	POM33	orf19.8656|IPF18853.1|IPF16097.3|Contig4-2647_0024|CA0843|orf6.2010|orf6.4935|CaO19.1054|IPF18853|CAWG_00973	Ca21chr1_C_albicans_SC5314	Ortholog(s) have structural constituent of nuclear pore activity	CAL0001188	GO:0032541|GO:0071790|GO:0005794|GO:0005643|GO:0010687|GO:0071786|GO:0005840|GO:0017056|GO:0034613|GO:0032153|GO:0051292	GO:0017056=structural constituent of nuclear pore	GO:0032541=cortical endoplasmic reticulum|GO:0005794=Golgi apparatus|GO:0005643=nuclear pore|GO:0005840=ribosome|GO:0032153=cell division site	GO:0071790=establishment of spindle pole body localization in nuclear envelope|GO:0010687=site selection involved in cell cycle cytokinesis|GO:0071786=endoplasmic reticulum tubular network organization|GO:0034613=cellular protein localization|GO:0051292=nuclear pore complex assembly	GO:0017056|GO:0017056|GO:0071790|GO:0034613|GO:0010687|GO:0051292|GO:0071786|GO:0071790|GO:0034613|GO:0010687|GO:0051292|GO:0071786|GO:0005840|GO:0005643|GO:0032541|GO:0005794|GO:0032153|GO:0005840|GO:0005643|GO:0032541|GO:0005794|GO:0032153
CAL0001192	0.169616	Detected	-0.169616	Detected	0	0.0183873	Detected	-0.0579391	Detected	-0.0197759	0.919827	1584.05	1232.07	1718.95	1304.99	CAL0001192	CAL0001192	CAL0001192 (alignment of 60bp with 100.00% identity) , Description: Predicted ORF in Assemblies 19, 20 and 21, Location: Complement (879384..878815) in Candida albicans Ca21chr1, Gene: orf19.1057 , :: Next best Hit, CAL0002321 (alignment of 22bp with 1	GCGAATTTGCAAAATTAGGTTTACAATTCTTGCTAGAGCAATTGCAACAACAACAACAAC	CAL0001192	orf19.1057		orf19.8659|IPF26268.1|IPF17234.2|Contig4-2089_0004|Contig4-2089_0005|CA2864|orf6.4932|CaO19.1057|CaO19.8659|IPF17234.3f|IPF17234.3|CAWG_00971	Ca21chr1_C_albicans_SC5314	Ortholog of C. parapsilosis CDC317 : CPAR2_107050, Candida tenuis NRRL Y-1498 : CANTEDRAFT_113999, Debaryomyces hansenii CBS767 : DEHA2D12518g and Candida dubliniensis CD36 : CD36_03980	CAL0001192	GO:0008150|GO:0003674|GO:0005575	GO:0003674=molecular_function	GO:0005575=cellular_component	GO:0008150=biological_process	GO:0003674|GO:0003674|GO:0008150|GO:0008150|GO:0005575|GO:0005575
CAL0001193	0.0397201	Detected	-0.0397201	Detected	0	0.0262113	Detected	-0.0176663	Detected	0.00427246	0.933568	7799.48	7263.39	9311.51	7229.89	CAL0001193	CAL0001193	CAL0001193 (alignment of 60bp with 100.00% identity) , Description: Predicted ORF in Assemblies 19, 20 and 21, Location: 879709..880689 in Candida albicans Ca21chr1, Gene: orf19.1058 , :: Next best Hit, CAL0005131 (alignment of 16bp with 100.00% identi	AGGAGCAGGGTATTTGATGTCACAAAGTTTGAAATACGATTATAAAGGAGAAGGTGTTGA	CAL0001193	orf19.1058	RPN13	orf19.8660|IPF26270.1|IPF20117.1|Contig4-2089_0002|CA2863|orf6.4931|IPF20117|CAWG_00970	Ca21chr1_C_albicans_SC5314	Ortholog(s) have ubiquitin binding activity, role in ubiquitin-dependent protein catabolic process and proteasome regulatory particle, lid subcomplex, proteasome storage granule localization	CAL0001193	GO:0006511|GO:0043130|GO:0008541|GO:0005634|GO:0034515	GO:0043130=ubiquitin binding	GO:0008541=proteasome regulatory particle, lid subcomplex|GO:0005634=nucleus|GO:0034515=proteasome storage granule	GO:0006511=ubiquitin-dependent protein catabolic process	GO:0043130|GO:0043130|GO:0006511|GO:0006511|GO:0008541|GO:0034515|GO:0005634|GO:0008541|GO:0034515|GO:0005634
CAL0001202	-0.100185	Compromised	0.100184	Compromised	-4.76837e-07	0.157669	Compromised	0.531162	Compromised	0.344416	0.245624	2.78268	3.14606	4.00964	4.15775	CAL0001202	CAL0001202	CAL0001202 (alignment of 60bp with 100.00% identity) , Description: Predicted ORF in Assemblies 19, 20 and 21; possibly spurious ORF (Annotation Working Group prediction), Location: Complement (881950..881441) in Candida albicans Ca21chr1, Gene: orf19.1	CACGACTCTCTTTTTTAAACTATTACTTGTTTTTAAAGTGGGAAAACCTCAAAACCTCGC	CAL0001202	orf19.1060		orf19.8662|IPF26269.1|IPF19964.1|Contig4-1791_0003|orf6.4929|CaO19.1060|CaO19.8662|CAWG_00968	Ca21chr1_C_albicans_SC5314	Ortholog of Candida dubliniensis CD36 : CD36_04005 and Candida albicans WO-1 : CAWG_00968
CAL0001203	0.0880799	Detected	-0.0880799	Detected	0	-1.08153	Detected	-0.323302	Detected	-0.702415	0.212882	36400	31700	19500	26400	CAL0001203	CAL0001203	NOTE: Has potential for cross hybridization with other orfs; CAL0001203 (alignment 60 bp with 100 % identity) , Description: Putative histone H3; amphotericin B repressed; regulated by Efg1p; farnesol regulated, Location: 882239..882649 in Candida albica	AAGCCAGGTACCGTTGCCTTGAGAGAAATTAGAAGATTTCAAAAATCTACTGAATTATTG	CAL0001203	orf19.1061	HHT21	orf19.8663|IPF26271.1|IPF7053.2|HHT2|Contig4-1791_0001|CA2861|orf6.4928|orf6.5620|CaO19.8663|HHT1|CaO19.1061|CAWG_00967	Ca21chr1_C_albicans_SC5314	Putative histone H3; amphotericin B repressed; regulated by Efg1p; farnesol regulated; Hap43p-induced	CAL0001203	GO:0030702|GO:0006334|GO:0005634|GO:0000786|GO:0003677|GO:0006974	GO:0003677=DNA binding	GO:0005634=nucleus|GO:0000786=nucleosome	GO:0030702=chromatin silencing at centromere|GO:0006334=nucleosome assembly|GO:0006974=response to DNA damage stimulus	GO:0003677|GO:0006334|GO:0006974|GO:0030702|GO:0005634|GO:0000786
CAL0001205	-0.0408087	Detected	0.0408087	Detected	0	0.296645	Detected	-0.0703869	Compromised	0.113129	0.608466	18.015	18.7582	27.4308	17.0244	CAL0001205	CAL0001205	CAL0001205 (alignment of 60bp with 100.00% identity) , Description: Predicted ORF in Assemblies 19, 20 and 21, Location: Complement (884228..882993) in Candida albicans Ca21chr1, Gene: orf19.1062 , :: Next best Hit, CAL0001228 (alignment of 17bp with 1	TTGGAACAAGAAGCAAATGGATTGGATCCTACTAAGGAACCACAGGTATATCCATTTTAA	CAL0001205	orf19.1062		orf19.8664|IPF26254.1|IPF7054.1|Contig4-1791_0008|CA2860|orf6.4927|HRQ1|CaO19.8664|CaO19.1062|IPF7054|CAWG_00966	Ca21chr1_C_albicans_SC5314	Ortholog of C. parapsilosis CDC317 : CPAR2_107000, Candida tenuis NRRL Y-1498 : CANTEDRAFT_113990, Candida dubliniensis CD36 : CD36_04020 and Pichia stipitis Pignal : PICST_32780	CAL0001205	GO:0008150|GO:0003674|GO:0005575	GO:0003674=molecular_function	GO:0005575=cellular_component	GO:0008150=biological_process	GO:0003674|GO:0003674|GO:0008150|GO:0008150|GO:0005575|GO:0005575
CAL0001206	0.164693	Detected	-0.164693	Detected	0	-0.184508	Detected	-0.349787	Detected	-0.267148	0.284159	834.475	653.5	789.43	563.482	CAL0001206	CAL0001206	CAL0001206 (alignment of 60bp with 100.00% identity) , Description: Predicted ORF in Assemblies 19, 20 and 21, Location: Complement (885808..884624) in Candida albicans Ca21chr1, Gene: orf19.1063 , :: Next best Hit, CAL0003125 (alignment of 15bp with 1	TGCATAGTATGGAATTTTGTTCAAACTGGATTATTTGCAGCATTTTTACCTCCAGCATGA	CAL0001206	orf19.1063	GPI18	orf19.8665|IPF26256.1|IPF7056.2|Contig4-1738_0001|CA2859|orf6.4926|FMP44|CaO19.1063|CaO19.8665|IPF7056|CAWG_00965	Ca21chr1_C_albicans_SC5314	Ortholog(s) have dolichyl-phosphate-mannose-glycolipid alpha-mannosyltransferase activity, role in GPI anchor biosynthetic process and integral to endoplasmic reticulum membrane, mannosyltransferase complex, mitochondrion localization	CAL0001206	GO:0005739|GO:0004584|GO:0031501|GO:0030176|GO:0006506	GO:0004584=dolichyl-phosphate-mannose-glycolipid alpha-mannosyltransferase activity	GO:0005739=mitochondrion|GO:0031501=mannosyltransferase complex|GO:0030176=integral to endoplasmic reticulum membrane	GO:0006506=GPI anchor biosynthetic process	GO:0004584|GO:0004584|GO:0006506|GO:0006506|GO:0031501|GO:0030176|GO:0005739|GO:0031501|GO:0030176|GO:0005739
CAL0001207	0.0576348	Detected	-0.0576348	Detected	0	-0.17295	Detected	-0.201958	Detected	-0.187454	0.0875235	62495.8	56772.5	64188.7	50355.4	CAL0001207	CAL0001207	CAL0001207 (alignment of 60bp with 100.00% identity) , Description: Probable acetyl-CoA synthetase, similar to known fungal acetyl-CoA synthetases; antigenic during murine systemic infection; antigenic in human; upregulated by Efg1p; macrophage-induced p	AACCCACAATCAGTTGAAGGTATAATTTCTGCCTTTGGTGCCCAATTCGGTAAGAAATAA	CAL0001207	orf19.1064	ACS2	orf19.8666|IPF26246.1|IPF7057.2|Contig4-2199_0001|CA2858|orf6.4925|CaO19.8666|CaO19.1064|CAWG_00964	Ca21chr1_C_albicans_SC5314	Acetyl-CoA synthetase; antigenic during human and murine infection; upregulated by Efg1p; macrophage-induced protein; soluble protein in hyphae; gene contains an intron	CAL0001207	GO:0016573|GO:0016208|GO:0016880|GO:0005730|GO:0001302|GO:0006083|GO:0003987|GO:0006085|GO:0005829	GO:0016208=AMP binding|GO:0016880=acid-ammonia (or amide) ligase activity|GO:0003987=acetate-CoA ligase activity	GO:0005730=nucleolus|GO:0005829=cytosol	GO:0016573=histone acetylation|GO:0001302=replicative cell aging|GO:0006083=acetate metabolic process|GO:0006085=acetyl-CoA biosynthetic process	GO:0003987|GO:0003987|GO:0003987|GO:0016208|GO:0016880|GO:0003987|GO:0003987|GO:0003987|GO:0016208|GO:0016880|GO:0006083|GO:0006085|GO:0006085|GO:0001302|GO:0016573|GO:0006083|GO:0006085|GO:0006085|GO:0001302|GO:0016573|GO:0005829|GO:0005829|GO:0005730|GO:0005829|GO:0005829|GO:0005730
CAL0001208	-0.0128188	Detected	0.0128188	Detected	0	-0.263378	Detected	0.0473123	Detected	-0.108033	0.559925	61699.7	61799.9	62499.7	62047.6	CAL0001208	CAL0001208	CAL0001208 (alignment of 60bp with 100.00% identity) , Description: HSP70 family chaperone; antigenic; role in sensitivity to, import of beta-defensin peptides; ATPase domain binds histatin 5; at surface of hyphae, but not yeast-form cells; farnesol-down	AATCTAAAGCTAACCCAATCATGACCAAAGCTTACCAAGCTGGTGCTACTCCTTCTGGTG	CAL0001208	orf19.1065	SSA2	orf19.8667|IPF26247.1|IPF7060.2|HS72|SSA1|Contig4-2688_0006|Contig4-2688_0009|CA2857|orf6.4924|CaO19.1065|CaO19.8667|CAWG_00963	Ca21chr1_C_albicans_SC5314	HSP70 family chaperone; found in cell wall fractions; antigenic; role in import of beta-defensin peptides; ATPase domain binds histatin 5; at surface of hyphae, not yeast-form cells; farnesol-downregulated in biofilm; caspofungin repressed	CAL0001208	GO:0042277|GO:0009986|GO:0005886|GO:0051701|GO:0006616|GO:0005832|GO:0006950|GO:0009636|GO:0000329|GO:0030446|GO:0005524|GO:0005829|GO:0005739|GO:0015833|GO:0016020|GO:0006457|GO:0009277|GO:0000304|GO:0051082|GO:0005844	GO:0042277=peptide binding|GO:0005524=ATP binding|GO:0051082=unfolded protein binding	GO:0009986=cell surface|GO:0005886=plasma membrane|GO:0005832=chaperonin-containing T-complex|GO:0000329=fungal-type vacuole membrane|GO:0030446=hyphal cell wall|GO:0005829=cytosol|GO:0005739=mitochondrion|GO:0016020=membrane|GO:0009277=fungal-type cell wall|GO:0005844=polysome	GO:0051701=interaction with host|GO:0006616=SRP-dependent cotranslational protein targeting to membrane, translocation|GO:0006950=response to stress|GO:0009636=response to toxin|GO:0015833=peptide transport|GO:0006457=protein folding|GO:0000304=response to singlet oxygen	GO:0042277|GO:0042277|GO:0005524|GO:0051082|GO:0042277|GO:0042277|GO:0005524|GO:0051082|GO:0015833|GO:0009636|GO:0009636|GO:0009636|GO:0051701|GO:0006457|GO:0006616|GO:0006950|GO:0015833|GO:0009636|GO:0009636|GO:0009636|GO:0051701|GO:0006457|GO:0006616|GO:0006950|GO:0000329|GO:0005832|GO:0005829|GO:0005739|GO:0005844|GO:0030446|GO:0030446|GO:0009277|GO:0009277|GO:0005886|GO:0016020|GO:0009277|GO:…
CAL0001209	0.200993	Detected	-0.200993	Detected	0	-0.351586	Detected	-0.104039	Detected	-0.227812	0.436313	486.325	362.163	399.581	379.702	CAL0001209	CAL0001209	CAL0001209 (alignment of 60bp with 100.00% identity) , Description: Predicted ORF in Assemblies 19, 20 and 21, Location: Complement (893750..892986) in Candida albicans Ca21chr1, Gene: orf19.1066 , :: Next best Hit, CAL0006222 (alignment of 26bp with 9	CCCCGTTGATAAAAATAGTGAAGTTGGTGATATCTCGGTCATGACGAAGAAATTAATAAA	CAL0001209	orf19.1066	GIG1	orf19.8668|IPF26264.1|IPF7062.2|Contig4-2688_0004|CA2856|orf6.4923|CaO19.1066|CaO19.8668|IPF7062|CAWG_00962	Ca21chr1_C_albicans_SC5314	Protein induced by N-acetylglucosamine (GlcNAc); localized in cytoplasm; mutation causes increased resistance to nikkomycin Z	CAL0001209	GO:0003674|GO:0005737|GO:0006044	GO:0003674=molecular_function	GO:0005737=cytoplasm	GO:0006044=N-acetylglucosamine metabolic process	GO:0003674|GO:0003674|GO:0006044|GO:0006044|GO:0005737|GO:0005737
CAL0001210	0.097856	Detected	-0.097856	Detected	0	0.316496	Detected	-0.26242	Detected	0.0270381	0.937551	5429.67	4664.93	7613.97	4080	CAL0001210	CAL0001210	CAL0001210 (alignment of 60bp with 100.00% identity) , Description: Protein described as phosphoglycerate mutase; decreased expression in hyphae compared to yeast-form cells; macrophage/pseudohyphal-repressed; induced by high levels of peroxide stress, f	TTATTATTTGGATCAAGAAAAGGCAGAAAAGGGGATCGCCAAAGTGAAAATGGAAGGTCT	CAL0001210	orf19.1067	GPM2	orf19.8669|IPF26265.1|IPF7065.1|Contig4-2688_0002|GPM1-2|CA2855|orf6.4922|CaO19.1067|CaO19.8669|CAWG_00961	Ca21chr1_C_albicans_SC5314	Putative phosphoglycerate mutase; decreased expression in hyphae compared to yeast-form cells; macrophage/pseudohyphal-repressed; induced by high levels of peroxide stress, farnesol-induced; biofilm- and planktonic growth-induced gene	CAL0001210	GO:0009277|GO:0016868|GO:0006096	GO:0016868=intramolecular transferase activity, phosphotransferases	GO:0009277=fungal-type cell wall	GO:0006096=glycolysis	GO:0016868|GO:0016868|GO:0006096|GO:0006096|GO:0009277|GO:0009277
CAL0001212	-0.0663977	Detected	0.0663977	Detected	0	-0.21776	Detected	0.0106916	Detected	-0.103534	0.515325	31854	34365.9	34563.7	32412.4	CAL0001212	CAL0001212	CAL0001212 (alignment of 60bp with 100.00% identity) , Description: DNA binding protein with Cys2-His2 zinc-finger; putative regulator of proteasome orfs; DNA recognition sequence (GAAGGCAAAA) enriched in regions upstream of proteasome orfs; induced in c	GCATGGTTTAGTTGGACAAGACGCATTAGATTTAATCAATGAAGCTAAAGAGAATGTTGA	CAL0001212	orf19.1069	RPN4	orf19.8671|IPF26253.1|IPF7070.2|Contig4-2688_0001|Contig4-2992_0023|CA2854|orf6.4920|CaO19.1069|CAWG_00960	Ca21chr1_C_albicans_SC5314	DNA binding protein with Cys2-His2 zinc-finger; putative regulator of proteasome genes; DNA recognition sequence (GAAGGCAAAA) enriched in regions upstream of proteasome genes; induced in core stress response; Hap43p-induced gene	CAL0001212	GO:0043565|GO:0001077|GO:0003700|GO:0006282|GO:0006357|GO:0032436|GO:0005634|GO:0043161|GO:0008270|GO:0061395|GO:0097201|GO:0000978	GO:0043565=sequence-specific DNA binding|GO:0001077=RNA polymerase II core promoter proximal region sequence-specific DNA binding transcription factor activity involved in positive regulation of transcription|GO:0003700=sequence-specific DNA binding transcription factor activity|GO:0008270=zinc ion binding|GO:0000978=RNA polymerase II core promoter proximal region sequence-specific DNA binding	GO:0005634=nucleus	GO:0006282=regulation of DNA repair|GO:0006357=regulation of transcription from RNA polymerase II promoter|GO:0032436=positive regulation of proteasomal ubiquitin-dependent protein catabolic process|GO:0043161=proteasomal ubiquitin-dependent protein catabolic process|GO:0061395=positive regulation of transcription from RNA polymerase II promoter in response to arsenic-containing substance|GO:0097…	GO:0043565|GO:0003700|GO:0008270|GO:0000978|GO:0001077|GO:0043565|GO:0003700|GO:0008270|GO:0000978|GO:0001077|GO:0043161|GO:0006357|GO:0097201|GO:0061395|GO:0032436|GO:0006282|GO:0043161|GO:0006357|GO:0097201|GO:0061395|GO:0032436|GO:0006282|GO:0005634|GO:0005634
CAL0002969	-0.0193853	Detected	0.0193853	Detected	0	-0.17725	Detected	-0.109916	Detected	-0.143583	0.0660389	2359.89	2385.34	2549.12	2137.86	CAL0002969	CAL0002969	CAL0002969 (alignment of 60bp with 100.00% identity) , Description: Predicted ORF in Assemblies 19, 20 and 21, Location: Complement (204200..201705) in Candida albicans Ca21chr6, Gene: orf19.107 , :: Next best Hit, CAL0003288 (alignment of 16bp with 10	CATGGTTACAAGAAATTGCCCCTCATGTCATTGGTGGTGTTAAAGTTAATATTAATGACT	CAL0002969	orf19.107	DHR2	orf19.7754|IPF27157.1|IPF10452.3|Contig4-2013_0010|orf6.2510|orf6.2569|Contig4-2501_0010|CA1155|JA2|IPF10452.2|DHR2|CaO19.107|CAWG_05256	Ca21chr6_C_albicans_SC5314	Ortholog(s) have RNA helicase activity, role in maturation of SSU-rRNA from tricistronic rRNA transcript (SSU-rRNA, 5.8S rRNA, LSU-rRNA) and nucleolus localization	CAL0002969	GO:0000462|GO:0008026|GO:0003724|GO:0005730|GO:0003676|GO:0005524	GO:0008026=ATP-dependent helicase activity|GO:0003724=RNA helicase activity|GO:0003676=nucleic acid binding|GO:0005524=ATP binding	GO:0005730=nucleolus	GO:0000462=maturation of SSU-rRNA from tricistronic rRNA transcript (SSU-rRNA, 5.8S rRNA, LSU-rRNA)	GO:0003676|GO:0008026|GO:0005524|GO:0003724|GO:0000462|GO:0005730
CAL0001220	0.0444374	Detected	-0.0444374	Detected	0	0.416562	Detected	0.308805	Detected	0.362684	0.0351378	849.467	785.923	1324.91	984.17	CAL0001220	CAL0001220	CAL0001220 (alignment of 60bp with 100.00% identity) , Description: Predicted ORF in Assemblies 19, 20 and 21, Location: Complement (901012..900062) in Candida albicans Ca21chr1, Gene: orf19.1070 , :: Next best Hit, CAL0002016 (alignment of 15bp with 1	AAAGATATCTCCAACAATCAAACTTCATCATGGTCAAGATCAAGATCATCTACTCTTGCA	CAL0001220	orf19.1070	YMR010W	orf19.8672|IPF26255.1|IPF17057.2|Contig4-2882_0025|CA2853|orf6.4919|CaO19.1070|IPF17057|CaO19.8672|CAWG_00959	Ca21chr1_C_albicans_SC5314	Ortholog(s) have cytoplasm localization	CAL0001220	GO:0008150|GO:0003674|GO:0005737	GO:0003674=molecular_function	GO:0005737=cytoplasm	GO:0008150=biological_process	GO:0003674|GO:0003674|GO:0008150|GO:0008150|GO:0005737|GO:0005737
CAL0001227	0.407526	Detected	-0.407526	Detected	0	-1.39758	Detected	-0.897445	Detected	-1.14751	0.138451	3673.5	2054.53	1266.81	1434.12	CAL0001227	CAL0001227	CAL0001227 (alignment of 60bp with 100.00% identity) , Description: Predicted ORF in Assemblies 19, 20 and 21; possibly spurious ORF (Annotation Working Group prediction), Location: Complement (924998..923865) in Candida albicans Ca21chr6, Gene: orf19.1	GCTGTTGATAGATTGGCTTGTTCGATTTTGTCTCTGGTTGGTAAAAACACTAATAATCAA	CAL0001227	orf19.1075		IPF18831.2|IPF19160.1|Contig4-1626_0009|CA0167|orf6.735|CaO19.1075|IPF19160|CAWG_04959	Ca21chr6_C_albicans_SC5314	Ortholog of Candida dubliniensis CD36 : CD36_64940, Pichia stipitis Pignal : PICST_30730, Candida tropicalis MYA-3404 : CTRG_02768 and Candida albicans WO-1 : CAWG_04959	CAL0001227	GO:0008150|GO:0003674|GO:0005575	GO:0003674=molecular_function	GO:0005575=cellular_component	GO:0008150=biological_process	GO:0003674|GO:0003674|GO:0008150|GO:0008150|GO:0005575|GO:0005575
CAL0120493	-0.0637617	Detected	0.0637617	Detected	0	0.0497928	Detected	-0.0547819	Detected	-0.00249457	0.978613	207.414	222.953	270.422	201.318	CAL0120493	CAL0120493	CAL0120493 (alignment of 60bp with 100.00% identity) , Description: Pseudoorf; added to Assembly 21 based on comparative genome analysis, Location: Complement (927336..927184) in Candida albicans Ca21chr6, Gene: orf19.1075.1 , :: Next best Hit, CAL00025	TGTCAATCAAGTACCGGGGCAGAATTGAATGGATTCCCACCAAAATTGGGTGATGCTGTT	CAL0120493	orf19.1075.1			Ca21chr6_C_albicans_SC5314	Pseudogene; added to Assembly 21 based on comparative genome analysis
CAL0001228	-0.015759	Detected	0.015759	Detected	0	0.852311	Detected	0.274326	Detected	0.563318	0.191003	284.373	285.998	625.495	335.392	CAL0001228	CAL0001228	CAL0001228 (alignment of 60bp with 100.00% identity) , Description: Member of MDR subfamily of ABC family; similar to S. cerevisiae ABC transporter, Atm1p; transcriptionally regulated by iron; expression greater in low iron; induced by nitric oxide in yh	GATGCTGATAAGATAATTGTTTTGAACAAAGGACAAGTAGTTGAAGAAGGAACTCATTGG	CAL0001228	orf19.1077	ATM1	orf19.8678|IPF14199.2|IPF19157.2|orf19.8676|orf6.2145|orf6.736|Contig4-2068_0003|CA0933|orf6.2147|CaO19.1077|CAWG_04958	Ca21chr6_C_albicans_SC5314	Member of MDR subfamily of ABC family; similar to S. cerevisiae ABC transporter, Atm1p; transcriptionally regulated by iron; expression greater in low iron; induced by nitric oxide independent of Yhb1p	CAL0001228	GO:0006879|GO:0005743|GO:0006810|GO:0042626|GO:0016021|GO:0034599|GO:0055085|GO:0005524	GO:0042626=ATPase activity, coupled to transmembrane movement of substances|GO:0005524=ATP binding	GO:0005743=mitochondrial inner membrane|GO:0016021=integral to membrane	GO:0006879=cellular iron ion homeostasis|GO:0006810=transport|GO:0034599=cellular response to oxidative stress|GO:0055085=transmembrane transport	GO:0042626|GO:0005524|GO:0042626|GO:0042626|GO:0005524|GO:0042626|GO:0006810|GO:0006879|GO:0034599|GO:0055085|GO:0006810|GO:0006879|GO:0034599|GO:0055085|GO:0016021|GO:0005743|GO:0016021|GO:0005743
CAL0001229	0.123431	Detected	-0.123431	Detected	0	0.480982	Detected	-0.35247	Detected	0.0642557	0.896026	8091.58	6709.77	12493.6	5611.95	CAL0001229	CAL0001229	CAL0001229 (alignment of 60bp with 100.00% identity) , Description: Uncharacterized protein, regulated by Gcn4p and hemoglobin; protein detected by mass spec in stationary phase cultures, Location: Complement (932489..931212) in Candida albicans Ca21chr	GAGTTGGTCATATGGGTTATTCAGTTTATGCTGGTCATGTTGATAAATTAACTAAAGCTC	CAL0001229	orf19.1078	HBR2	orf19.8679|orf19.8680|IPF26229.1|IPF26228.1|IPF14203.2|IPF14202.2|Contig4-2068_0002|CA0934|CA0935|orf6.2148|orf6.2149|orf19.1079|IPF14203.3f|CAWG_04957	Ca21chr6_C_albicans_SC5314	Putative alanine glyoxylate aminotransferase; regulated by Gcn4p and hemoglobin; stationary phase enriched protein	CAL0001229	GO:0005739|GO:0030170|GO:0019265|GO:0008453	GO:0030170=pyridoxal phosphate binding|GO:0008453=alanine-glyoxylate transaminase activity	GO:0005739=mitochondrion	GO:0019265=glycine biosynthetic process, by transamination of glyoxylate	GO:0030170|GO:0008453|GO:0030170|GO:0008453|GO:0019265|GO:0019265|GO:0005739|GO:0005739
CAL0001247	0.225233	Compromised	-0.225232	Compromised	4.76837e-07	0.0987272	Compromised	-0.254231	Compromised	-0.0777516	0.811309	7.63729	5.4995	8.43098	5.28381	CAL0001247	CAL0001247	CAL0001247 (alignment of 60bp with 100.00% identity) , Description: Predicted ORF in Assemblies 19, 20 and 21; possibly spurious ORF (Annotation Working Group prediction), Location: 934133..935740 in Candida albicans Ca21chr6, Gene: orf19.1080 , :: Next	TTTGACAACACGTAATTCTCGTGCACCCAATAATGATCGATTAAAAGAATTTCAAACCCA	CAL0001247	orf19.1080		orf19.8681|IPF26225.1|IPF16291.2|Contig4-1486_0005|CA0936|orf6.2150|IPF16291	Ca21chr6_C_albicans_SC5314	Ortholog of C. parapsilosis CDC317 : CPAR2_600390, Candida dubliniensis CD36 : CD36_64900, Pichia stipitis Pignal : PICST_30726 and Candida guilliermondii ATCC 6260 : PGUG_04023	CAL0001247	GO:0008150|GO:0003674|GO:0005575	GO:0003674=molecular_function	GO:0005575=cellular_component	GO:0008150=biological_process	GO:0003674|GO:0003674|GO:0008150|GO:0008150|GO:0005575|GO:0005575
CAL0001250	0.14592	Detected	-0.14592	Detected	0	-0.980228	Detected	-0.570624	Detected	-0.775426	0.0910356	406.508	326.742	224.433	238.621	CAL0001250	CAL0001250	CAL0001250 (alignment of 60bp with 100.00% identity) , Description: Predicted ORF in Assemblies 19, 20 and 21, Location: 936223..936738 in Candida albicans Ca21chr6, Gene: orf19.1082 , :: Next best Hit, CAL0000500 (alignment of 19bp with 100.00% identi	CCCAAAATCTATACATTGCCTGTGTTGTACATTGTGATAGGTAAACATTCAATTGTGTCA	CAL0001250	orf19.1082		orf19.8683|CA0937|orf6.1531|orf6.2152|CaO19.1082|IPF19892|IPF19892.1|CAWG_04955	Ca21chr6_C_albicans_SC5314	Has domain(s) with predicted nucleic acid binding activity	CAL0001250	GO:0008150|GO:0005575|GO:0003676	GO:0003676=nucleic acid binding	GO:0005575=cellular_component	GO:0008150=biological_process	GO:0003676|GO:0003676|GO:0008150|GO:0008150|GO:0005575|GO:0005575
CAF0006920	0.205336	Detected	-0.205336	Detected	0	-0.158978	Detected	-0.228792	Detected	-0.193885	0.450188	7378.33	5461.61	6907.32	5267.6	CAF0006920	CAF0006920	CAF0006920(alignment 60bp with 100.00% identity) , Description: ORF Predicted by Annotation Working Group, Location: 937165..937416 in Candida albicans Ca21chr6, Gene: orf19.1082.1 , :: Next best hit , location within target gene 188-247 , CAL0001864(al	ATTGGGTCGAAAAATGGGATGATCAAAGAGCTGCTGGTAAATTCCCAGTCAACATGGACG	CAF0006920	orf19.1082.1	COX12	IPF16288.3|IPF16287.1|Contig4-2123_0001|CA0938|COX12|IPF16288.2|CAWG_04954	Ca21chr6_C_albicans_SC5314	Ortholog(s) have cytochrome-c oxidase activity, role in mitochondrial respiratory chain complex IV assembly and cytosol, mitochondrial respiratory chain complex IV, nucleus localization	CAF0006920	GO:0033617|GO:0004129|GO:0005634|GO:0005751|GO:0005829	GO:0004129=cytochrome-c oxidase activity	GO:0005634=nucleus|GO:0005751=mitochondrial respiratory chain complex IV|GO:0005829=cytosol	GO:0033617=mitochondrial respiratory chain complex IV assembly	GO:0004129|GO:0004129|GO:0033617|GO:0033617|GO:0005634|GO:0005829|GO:0005751|GO:0005634|GO:0005829|GO:0005751
CAL0001251	0.162319	Detected	-0.162319	Detected	0	-0.479562	Detected	-0.200711	Detected	-0.340137	0.252883	2239.98	1759.97	1729.97	1679.97	CAL0001251	CAL0001251	CAL0001251 (alignment of 60bp with 100.00% identity) , Description: Predicted ORF in Assemblies 19, 20 and 21; macrophage-induced orf; possibly spurious ORF (Annotation Working Group prediction), Location: Complement (938440..937757) in Candida albicans	GATTTGTTTGCTAGTGAATCAACTAGCAAGCCTACCAATTGGTCCGAAGATAGTTTCTGG	CAL0001251	orf19.1083	JLP2	orf19.8684|IPF26227.1|IPF14574.2|Contig4-2123_0002|CA0541|orf6.1532|CaO19.8684|CaO19.1083|IPF14574|CAWG_04953	Ca21chr6_C_albicans_SC5314	Putative protein of unknown function; macrophage-induced gene	CAL0001251	GO:0008150|GO:0003674|GO:0005737	GO:0003674=molecular_function	GO:0005737=cytoplasm	GO:0008150=biological_process	GO:0003674|GO:0003674|GO:0008150|GO:0008150|GO:0005737|GO:0005737
CAL0001252	-0.121334	Detected	0.121334	Detected	0	0.110595	Detected	-0.148765	Detected	-0.0190849	0.924229	1849.89	2153.69	2618.09	1750.77	CAL0001252	CAL0001252	CAL0001252 (alignment of 60bp with 100.00% identity) , Description: Protein similar to S. cerevisiae Cdc39p, which is part of the CCR4-NOT transcription regulatory complex; transposon mutation affects filamentous growth, Location: 940096..946146 in Cand	CCACATCCTTGGGGATTAACTATATTATTTACTGAATTGGTTAAGAATGGGGATTATGGA	CAL0001252	orf19.1084	CDC39	orf19.8685|IPF19634.2|IPF19633.2|Contig4-2123_0005|CA0542|orf6.1517|orf6.1533|CA0530|IPF19633.3eoc|IPF19634.1|CaO19.1084|CAWG_04952	Ca21chr6_C_albicans_SC5314	Protein similar to S. cerevisiae Cdc39p, which is part of the CCR4-NOT transcription regulatory complex; transposon mutation affects filamentous growth	CAL0001252	GO:0006368|GO:0030447|GO:0005634|GO:0036180|GO:0030015|GO:0005829|GO:0003674|GO:0007124|GO:0032968|GO:0036170|GO:0051726|GO:0071216|GO:0000749|GO:0000289|GO:0009267	GO:0003674=molecular_function	GO:0005634=nucleus|GO:0030015=CCR4-NOT core complex|GO:0005829=cytosol	GO:0006368=transcription elongation from RNA polymerase II promoter|GO:0030447=filamentous growth|GO:0036180=filamentous growth of a population of unicellular organisms in response to biotic stimulus|GO:0007124=pseudohyphal growth|GO:0032968=positive regulation of transcription elongation from RNA polymerase II promoter|GO:0036170=filamentous growth of a population of unicellular organisms in res…	GO:0003674|GO:0003674|GO:0030447|GO:0006368|GO:0007124|GO:0032968|GO:0000289|GO:0051726|GO:0000749|GO:0009267|GO:0036170|GO:0036180|GO:0071216|GO:0009267|GO:0030447|GO:0071216|GO:0036180|GO:0036170|GO:0030447|GO:0006368|GO:0007124|GO:0032968|GO:0000289|GO:0051726|GO:0000749|GO:0009267|GO:0036170|GO:0036180|GO:0071216|GO:0009267|GO:0030447|GO:0071216|GO:0036180|GO:0036170|GO:0005634|GO:0005829|GO:…
CAL0001253	0.152814	Detected	-0.152814	Detected	0	0.131466	Detected	-0.0135961	Detected	0.0589352	0.760788	3064.8	2439.98	3639.12	2634.2	CAL0001253	CAL0001253	CAL0001253 (alignment of 60bp with 100.00% identity) , Description: Predicted ORF in Assemblies 19, 20 and 21, Location: 946663..947361 in Candida albicans Ca21chr6, Gene: orf19.1085 , :: Next best Hit, CAL0001934 (alignment of 15bp with 100.00% identi	GGTCAATATGAAAGTATGGGATTTCCTAGAGATAAGACCATTCAAGTGTTAAGAAGAATG	CAL0001253	orf19.1085	UBC1	orf19.8686|IPF10066.2|IPF17337.1|Contig4-2194_0002|Contig4-2887_0017|CA0531|orf6.1226|orf6.1518|UBC1|CaO19.1085|CAWG_04951	Ca21chr6_C_albicans_SC5314	Ortholog(s) have ubiquitin-protein ligase activity and role in ER-associated protein catabolic process, protein ubiquitination involved in ubiquitin-dependent protein catabolic process, vesicle organization	CAL0001253	GO:0016050|GO:0000502|GO:0004842|GO:0042787|GO:0005634|GO:0030433|GO:0005829|GO:0043687	GO:0004842=ubiquitin-protein ligase activity	GO:0000502=proteasome complex|GO:0005634=nucleus|GO:0005829=cytosol	GO:0016050=vesicle organization|GO:0042787=protein ubiquitination involved in ubiquitin-dependent protein catabolic process|GO:0030433=ER-associated protein catabolic process|GO:0043687=post-translational protein modification	GO:0004842|GO:0004842|GO:0016050|GO:0030433|GO:0042787|GO:0043687|GO:0016050|GO:0030433|GO:0042787|GO:0043687|GO:0005634|GO:0000502|GO:0005829|GO:0005634|GO:0000502|GO:0005829
CAL0001254	-0.0177331	Detected	0.0177331	Detected	0	-0.052175	Detected	-0.176401	Detected	-0.114288	0.218866	7633.3	7697.96	8981.83	6596.13	CAL0001254	CAL0001254	CAL0001254 (alignment of 60bp with 100.00% identity) , Description: Predicted ORF in Assemblies 19, 20 and 21, Location: 948405..950273 in Candida albicans Ca21chr6, Gene: orf19.1086 , :: Next best Hit, CAL0005498 (alignment of 22bp with 95.45% identit	CCAATCTAAAGAAGGTAGTGGCAGTGGTGGTAGTGCCAAAAATAAAGACAAATTTGATAA	CAL0001254	orf19.1086	BRE5	orf19.8687|IPF19327.2|IPF10062.2|Contig4-2194_0004|CA0372|orf6.1225|orf6.349|BRE5|CaO19.1086|IPF10062|CAWG_04950	Ca21chr6_C_albicans_SC5314	Ortholog(s) have role in protein deubiquitination, regulation of ER to Golgi vesicle-mediated transport, regulation of retrograde vesicle-mediated transport, Golgi to ER, ribophagy and cytoplasm localization	CAL0001254	GO:0005737|GO:0016579|GO:0034517|GO:0060628|GO:2000156|GO:0006810|GO:0003676	GO:0003676=nucleic acid binding	GO:0005737=cytoplasm	GO:0016579=protein deubiquitination|GO:0034517=ribophagy|GO:0060628=regulation of ER to Golgi vesicle-mediated transport|GO:2000156=regulation of retrograde vesicle-mediated transport, Golgi to ER|GO:0006810=transport	GO:0003676|GO:0003676|GO:0034517|GO:0016579|GO:2000156|GO:0060628|GO:0006810|GO:0034517|GO:0016579|GO:2000156|GO:0060628|GO:0006810|GO:0005737|GO:0005737
CAL0001255	-0.132526	Detected	0.132526	Detected	0	0.84466	Detected	0.264843	Detected	0.554751	0.22393	616.724	729.234	1463.1	783.523	CAL0001255	CAL0001255	CAL0001255 (alignment of 60bp with 100.00% identity) , Description: Predicted ORF in Assemblies 19, 20 and 21, Location: 950736..953156 in Candida albicans Ca21chr6, Gene: orf19.1087 , :: Next best Hit, CAL0000158 (alignment of 17bp with 100.00% identi	AAAGGGCATTATTCCCGAAATCAAACATTGATTTTACCGTGAAACTGATTTCAAGTGGAA	CAL0001255	orf19.1087		orf19.8688|IPF19579.1|IPF19578.1|CA0371|orf6.1224|orf6.350|CaO19.1087|IPF19578|CAWG_04949	Ca21chr6_C_albicans_SC5314	Ortholog of C. parapsilosis CDC317 : CPAR2_601130, Lodderomyces elongisporus NRLL YB-4239 : LELG_04885, Candida dubliniensis CD36 : CD36_64620 and Candida orthopsilosis Co 90-125 : CORT0F02130	CAL0001255	GO:0005739|GO:0008150|GO:0003674	GO:0003674=molecular_function	GO:0005739=mitochondrion	GO:0008150=biological_process	GO:0003674|GO:0003674|GO:0008150|GO:0008150|GO:0005739|GO:0005739
CAL0001256	0.0926509	Detected	-0.0926509	Detected	0	1.16139	Detected	1.23827	Detected	1.19983	0.00691687	2304.99	1994.69	5826.57	4918.98	CAL0001256	CAL0001256	CAL0001256 (alignment of 60bp with 100.00% identity) , Description: Putative protein involved in fatty acid oxidation; expression is Tac1p-dependent, Location: 953697..954434 in Candida albicans Ca21chr6, Gene: orf19.1089 , :: Next best Hit, CAL0000422	GGTTTAGCTGGGGTTATAACTTCATTATTAGGTTTACAAGATTTATGGAAAGCCACTTGA	CAL0001256	orf19.1089	PEX11	orf19.8690|IPF19049.2|IPF29582.1|CA0310|orf6.1103|orf6.1222|CaO19.1089|IPF19049.1|CAWG_04948	Ca21chr6_C_albicans_SC5314	Putative peroxisomal membrane protein involved in fatty acid oxidation; expression is Tac1p; Hms1p-dependent upregulation by geldamycin	CAL0001256	GO:0005739|GO:0003674|GO:0019395|GO:0005783|GO:0006631|GO:0005778|GO:0016559	GO:0003674=molecular_function	GO:0005739=mitochondrion|GO:0005783=endoplasmic reticulum|GO:0005778=peroxisomal membrane	GO:0019395=fatty acid oxidation|GO:0006631=fatty acid metabolic process|GO:0016559=peroxisome fission	GO:0003674|GO:0003674|GO:0006631|GO:0019395|GO:0019395|GO:0016559|GO:0006631|GO:0019395|GO:0019395|GO:0016559|GO:0005778|GO:0005783|GO:0005783|GO:0005739|GO:0005778|GO:0005778|GO:0005783|GO:0005783|GO:0005739|GO:0005778
CAL0002971	0.0248451	Detected	-0.0248451	Detected	0	0.278183	Detected	-0.036273	Detected	0.120955	0.526688	3168.72	3012.41	4551.64	2929.73	CAL0002971	CAL0002971	CAL0002971 (alignment of 60bp with 100.00% identity) , Description: Predicted ORF in Assemblies 19, 20 and 21, Location: 204422..205927 in Candida albicans Ca21chr6, Gene: orf19.109 , :: Next best Hit, CAL0003240 (alignment of 18bp with 100.00% identit	GTGGTGTATACATGGGATTGGACAGAAATCAAATTGAGGATCCAGATGATGTTATATTAT	CAL0002971	orf19.109	MSY1	orf19.7756|IPF11923.1|IPF10449.3|orf6.2567|Contig4-2501_0009|CA1193|CaO19.7756|MSY1|CaO19.109|CAWG_05255	Ca21chr6_C_albicans_SC5314	Probable mitochondrial tyrosyl-tRNA synthetase, based on conservation in other fungi	CAL0002971	GO:0005739|GO:0004831|GO:0003723|GO:0070184|GO:0005524	GO:0004831=tyrosine-tRNA ligase activity|GO:0003723=RNA binding|GO:0005524=ATP binding	GO:0005739=mitochondrion	GO:0070184=mitochondrial tyrosyl-tRNA aminoacylation	GO:0004831|GO:0003723|GO:0005524|GO:0004831|GO:0070184|GO:0070184|GO:0005739|GO:0005739
CAL0001275	0.0249681	Detected	-0.0249681	Detected	0	-0.984589	Compromised	-0.802196	Compromised	-0.893392	0.0110164	23.3719	22.2151	13.9897	12.7067	CAL0001275	CAL0001275	CAL0001275 (alignment of 60bp with 100.00% identity) , Description: Predicted ORF in Assemblies 19, 20 and 21; possibly spurious ORF (Annotation Working Group prediction), Location: Complement (954968..954621) in Candida albicans Ca21chr6, Gene: orf19.1	ATTATCTACTGAATTAACAAATGTTCTACTAAAATATTATTGGGTAGGATTTGATACTGG	CAL0001275	orf19.1090		orf19.8691|IPF26232.1|IPF16934.2|orf6.1102|CaO19.1090|CaO19.8691|CAWG_04947	Ca21chr6_C_albicans_SC5314	Ortholog of C. parapsilosis CDC317 : CPAR2_601110, Candida tenuis NRRL Y-1498 : CANTEDRAFT_119969, Lodderomyces elongisporus NRLL YB-4239 : LELG_04881 and Debaryomyces hansenii CBS767 : DEHA2A05896g	CAL0001275	GO:0008150|GO:0003674|GO:0005575	GO:0003674=molecular_function	GO:0005575=cellular_component	GO:0008150=biological_process	GO:0003674|GO:0003674|GO:0008150|GO:0008150|GO:0005575|GO:0005575
CAL0001277	0.0919709	Detected	-0.0919709	Detected	0	-0.984244	Detected	-0.176632	Detected	-0.580438	0.296086	1754.65	1519.87	1002.86	1404.99	CAL0001277	CAL0001277	CAL0001277 (alignment of 60bp with 100.00% identity) , Description: Putative ortholog of S. cerevisiae Nop8p, which is a nucleolar protein required for 60S ribosomal subunit bioorfsis, Location: 955195..957267 in Candida albicans Ca21chr6, Gene: orf19.1	GAGGTGATATTTCACGTGAATGTAAACGTCGTAAACGTGATTTATTAAGAACCATACGTA	CAL0001277	orf19.1091	NOP8	orf19.8692|IPF26223.1|IPF16935.2|CA0309|orf6.1101|CaO19.8692|NOP8|CaO19.1091|IPF16935|CAWG_04946	Ca21chr6_C_albicans_SC5314	Ortholog(s) have role in ribosomal large subunit biogenesis and nucleolus localization	CAL0001277	GO:0000166|GO:0005730|GO:0042273|GO:0003676	GO:0000166=nucleotide binding|GO:0003676=nucleic acid binding	GO:0005730=nucleolus	GO:0042273=ribosomal large subunit biogenesis	GO:0003676|GO:0000166|GO:0003676|GO:0000166|GO:0042273|GO:0042273|GO:0005730|GO:0005730
CAL0001279	0.124433	Detected	-0.124433	Detected	0	0.529985	Detected	0.319644	Detected	0.424815	0.12097	569.989	471.995	909.851	629.465	CAL0001279	CAL0001279	CAL0001279 (alignment of 60bp with 100.00% identity) , Description: Predicted ORF in Assemblies 19, 20 and 21, Location: 957611..959170 in Candida albicans Ca21chr6, Gene: orf19.1092 , :: Next best Hit, CAL0002246 (alignment of 20bp with 95.00% identit	ACTTGGTGGAATTTTGATCATTGTGTTCCCACCATCAGTCAATTTATCATCTACTTCTAA	CAL0001279	orf19.1092	ALG3	orf19.8693|IPF17442.2|IPF29580.1|CA0308|orf6.1100|RHK1|CaO19.1092|CAWG_04945	Ca21chr6_C_albicans_SC5314	Ortholog(s) have alpha-1,3-mannosyltransferase activity, role in oligosaccharide-lipid intermediate biosynthetic process and endoplasmic reticulum localization	CAL0001279	GO:0006490|GO:0000033|GO:0005783|GO:0016021	GO:0000033=alpha-1,3-mannosyltransferase activity	GO:0005783=endoplasmic reticulum|GO:0016021=integral to membrane	GO:0006490=oligosaccharide-lipid intermediate biosynthetic process	GO:0000033|GO:0000033|GO:0006490|GO:0006490|GO:0005783|GO:0016021|GO:0005783|GO:0016021
CAL0001280	-0.0617871	Detected	0.0617871	Detected	0	0.0824017	Detected	0.230701	Detected	0.156551	0.246268	1742.41	1867.83	2320.47	2058.45	CAL0001280	CAL0001280	CAL0001280 (alignment of 60bp with 100.00% identity) , Description: Transcription factor; required for wild-type hyphal formation; regulates hyphal orf expression; required for virulence in mouse systemic infection; binds Efg1p; binds Mss11p via LisH mot	GATGATGATAATTTCATGGGAATGAATTGGGCTGCAGATCCAATTGAAAATGGCGATTAG	CAL0001280	orf19.1093	FLO8	orf19.8695|IPF26221.1|IPF10214.2|CA1476|orf6.3004|CaO19.1093|IPF10214|CAWG_04944	Ca21chr6_C_albicans_SC5314	Transcription factor; required for hyphal formation and CO2 induced white-opaque switching; regulates hyphal gene expression; required for virulence in mouse systemic infection; binds Efg1p; binds Mss11p via LisH motif; has LUFS domain	CAL0001280	GO:0042710|GO:1900524|GO:0030447|GO:0036187|GO:0035957|GO:1900445|GO:0036095|GO:1900241|GO:0048869|GO:0005634|GO:0036180|GO:0070887|GO:0000978|GO:1900461|GO:0005737|GO:0001077|GO:0036171|GO:0045944|GO:0044182|GO:0009405|GO:0071216|GO:1900439	GO:0000978=RNA polymerase II core promoter proximal region sequence-specific DNA binding|GO:0001077=RNA polymerase II core promoter proximal region sequence-specific DNA binding transcription factor activity involved in positive regulation of transcription	GO:0005634=nucleus|GO:0005737=cytoplasm	GO:0042710=biofilm formation|GO:1900524=positive regulation of flocculation via cell wall protein-carbohydrate interaction by positive regulation of transcription from RNA polymerase II promoter|GO:0030447=filamentous growth|GO:0036187=cell growth mode switching, budding to filamentous|GO:0035957=positive regulation of starch catabolic process by positive regulation of transcription from RNA poly…	GO:0000978|GO:0001077|GO:0000978|GO:0001077|GO:0009405|GO:0045944|GO:0045944|GO:0009405|GO:0009405|GO:0036171|GO:0036180|GO:0044182|GO:0036171|GO:1900439|GO:0048869|GO:1900241|GO:0044182|GO:0030447|GO:0071216|GO:0071216|GO:0071216|GO:0070887|GO:0036180|GO:1900445|GO:0035957|GO:1900524|GO:0036095|GO:0042710|GO:1900461|GO:0036180|GO:0036187|GO:0009405|GO:0045944|GO:0045944|GO:0009405|GO:0009405|GO:…
CAL0001281	0.107101	Detected	-0.107101	Detected	0	-0.0911808	Detected	-0.154059	Detected	-0.12262	0.386547	5535	4694.87	5813.66	4454.93	CAL0001281	CAL0001281	CAL0001281 (alignment of 60bp with 100.00% identity) , Description: Predicted ORF in Assemblies 19, 20 and 21, Location: Complement (965793..964642) in Candida albicans Ca21chr6, Gene: orf19.1095 , :: Next best Hit, CAL0002881 (alignment of 15bp with 1	CCTATGCGATTAGTTATGATTGGTCATTGGGATATATGGGTAATAGACAAGATTATCCAA	CAL0001281	orf19.1095	GLE2	orf19.8697|IPF26226.1|IPF10209.2|Contig4-2338_0010|CA1475|orf6.3002|CaO19.8697|CaO19.1095|GLE2|CAWG_04943	Ca21chr6_C_albicans_SC5314	Putative nuclear pore complex; possibly an essential gene, disruptants not obtained by UAU1 method	CAL0001281	GO:0003674|GO:0005737|GO:0016973|GO:0010389|GO:0031081|GO:0000973|GO:2000728	GO:0003674=molecular_function	GO:0005737=cytoplasm	GO:0016973=poly(A)+ mRNA export from nucleus|GO:0010389=regulation of G2/M transition of mitotic cell cycle|GO:0031081=nuclear pore distribution|GO:0000973=posttranscriptional tethering of RNA polymerase II gene DNA at nuclear periphery|GO:2000728=regulation of mRNA export from nucleus in response to heat stress	GO:0003674|GO:0003674|GO:0016973|GO:0031081|GO:0010389|GO:2000728|GO:0000973|GO:0016973|GO:0031081|GO:0010389|GO:2000728|GO:0000973|GO:0005737|GO:0005737
CAL0001282	0.0890341	Detected	-0.0890341	Detected	0	0.592662	Detected	0.10148	Detected	0.347071	0.3153	295.09	256.648	504.176	287.106	CAL0001282	CAL0001282	CAL0001282 (alignment of 60bp with 100.00% identity) , Description: Predicted ORF in Assemblies 19, 20 and 21, Location: 966081..968720 in Candida albicans Ca21chr6, Gene: orf19.1096 , :: Next best Hit, CAL0005667 (alignment of 16bp with 100.00% identi	GTTTGATTATTGTTAGTAATCAAGACGAGACTTCAATGACGGGATTCATCGATCGATTTA	CAL0001282	orf19.1096		orf19.8698|IPF26218.1|IPF10208.2|Contig4-2338_0007|CA1474|orf6.3001|CaO19.8698|GEF13|CaO19.1096|IPF10208|CAWG_04942	Ca21chr6_C_albicans_SC5314	Has domain(s) with predicted voltage-gated chloride channel activity, role in chloride transport, transmembrane transport and membrane localization	CAL0001282	GO:0006821|GO:0016020|GO:0005247|GO:0055085	GO:0005247=voltage-gated chloride channel activity	GO:0016020=membrane	GO:0006821=chloride transport|GO:0055085=transmembrane transport	GO:0005247|GO:0005247|GO:0006821|GO:0055085|GO:0006821|GO:0055085|GO:0016020|GO:0016020
CAL0001283	0.0174499	Detected	-0.0174499	Detected	0	0.121645	Detected	-0.421336	Detected	-0.149845	0.637081	430	413	557	306	CAL0001283	CAL0001283	NOTE: Has potential for cross hybridization with other orfs; CAL0001283 (alignment 60 bp with 100 % identity) , Description: ALS family protein; role in adhesion, biofilm formation, germ tube induction; expressed at infection of human buccal epithelial ce	GTACTGGTGTTCCACCACCTTTAGCGCCATCGACAGAAACACAAACTACCAATAATGTAC	CAL0001283	orf19.1097	ALS2	orf19.8699|orf19.8700|orf6.1311|ALS4|orf19.9669|orf19.9670|IPF25194.1|IPF25217.1|IPF18994.1|IPF16055.3|IPF26222.1|IPF26230.1|IPF15450.3|IPF10205.2|CA1473|CA1471|orf6.3000|orf6.2999|CA0412|CA0413|ALS12|orf19.1098|orf19.2121|orf19.2122|ALS2.5f|CAWG_04941	Ca21chr6_C_albicans_SC5314	ALS family protein; role in adhesion, biofilm formation, germ tube induction; expressed at infection of human buccal epithelial cells; putative GPI-anchor; induced by ketoconazole, low iron and at cell wall regeneration; regulated by Sfu1p	CAL0001283	GO:0003674|GO:0030448|GO:0044406|GO:0016337|GO:0009986|GO:0009277|GO:0044011|GO:0009405	GO:0003674=molecular_function	GO:0009986=cell surface|GO:0009277=fungal-type cell wall	GO:0030448=hyphal growth|GO:0044406=adhesion to host|GO:0016337=cell-cell adhesion|GO:0044011=single-species biofilm formation on inanimate substrate|GO:0009405=pathogenesis	GO:0003674|GO:0016337|GO:0044406|GO:0030448|GO:0009405|GO:0044011|GO:0009986|GO:0009986|GO:0009277|GO:0009277
CAL0000503	-0.295907	Detected	0.295907	Detected	2.38419e-07	2.03797	Detected	1.64474	Detected	1.84135	0.0352687	195	289.185	1184.74	722.05	CAL0000503	CAL0000503	CAL0000503 (alignment of 60bp with 100.00% identity) , Description: Gene transcription regulated by Mig1p and Tup1p; possibly spurious ORF (Annotation Working Group prediction), Location: Complement (1558272..1557553) in Candida albicans Ca21chrR, Gene:	GAGAAGAAGGTTGACTCGTATGACAACAATAAGGTTCCACAAGTACCCACACAGGACTAA	CAL0000503	orf19.11		orf19.7684|orf6.1705|IPF27233.1|IPF11566.1|Contig4-2506_0003|CA0650|CaO19.7684|CaO19.11|IPF11566|CAWG_02012	Ca21chrR_C_albicans_SC5314	Gene transcription regulated by Mig1p and Tup1p	CAL0000503	GO:0008150|GO:0003674|GO:0005575	GO:0003674=molecular_function	GO:0005575=cellular_component	GO:0008150=biological_process	GO:0003674|GO:0003674|GO:0008150|GO:0008150|GO:0005575|GO:0005575
CAL0001854	-0.352411	Detected	0.352411	Detected	-2.38419e-07	-0.122224	Detected	-0.449297	Detected	-0.285761	0.538576	23.6159	37.876	33.3825	21.3	CAL0001854	CAL0001854	CAL0001854 (alignment of 60bp with 100.00% identity) , Description: Predicted ORF in Assemblies 19, 20 and 21; possibly spurious ORF (Annotation Working Group prediction), Location: Complement (858178..857705) in Candida albicans Ca21chr5, Gene: orf19.1	CGAACACACACAAGATGTTTAACCAACACAATTCTACAGCAACTTATTCTTCTTCTTCTT	CAL0001854	orf19.1105		orf19.8701|IPF26202.1|IPF15959.2|Contig4-2815_0001|CA0170|orf6.753|IPF15959|CaO19.8701|CaO19.1105|CAWG_04763	Ca21chr5_C_albicans_SC5314	Ortholog of C. parapsilosis CDC317 : CPAR2_302980, Candida dubliniensis CD36 : CD36_53630, Pichia stipitis Pignal : PICST_32155 and Candida orthopsilosis Co 90-125 : CORT0E05120	CAL0001854	GO:0008150|GO:0003674|GO:0005575	GO:0003674=molecular_function	GO:0005575=cellular_component	GO:0008150=biological_process	GO:0003674|GO:0003674|GO:0008150|GO:0008150|GO:0005575|GO:0005575
CAL0006784	0.160512	Detected	-0.160512	Detected	0	-0.938079	Detected	-0.0424314	Detected	-0.490255	0.411069	14120.3	11122.3	7946.14	11833	CAL0006784	CAL0006784	CAL0006784 (alignment of 60bp with 100.00% identity) , Description: Regulator of sorbose utilization; putative GPI-anchor; predicted helix-loop helix domain; hyphal induced; induced during cell wall reorfration; shows colony morphology-related orf regula	TTATCGCTTCATTAGCCTTAGTTGCTTCCATCAACGCTAAATTCCACAACACCACTGGTG	CAL0006784	orf19.1105.2	PGA56	IPF17002.3|IPF15957.2|Contig4-2815_0003|CSU51|CA0171|IPF15957|CAWG_04762	Ca21chr5_C_albicans_SC5314	Regulator of sorbose utilization; putative GPI-anchor; predicted helix-loop helix domain; hyphal induced; induced during cell wall regeneration; colony morphology-related gene regulation by Ssn6p; transcription activated by Tbf1p, Hap43p	CAL0006784	GO:0003674|GO:0042850|GO:0009986|GO:0005634	GO:0003674=molecular_function	GO:0009986=cell surface|GO:0005634=nucleus	GO:0042850=L-sorbose catabolic process	GO:0003674|GO:0042850|GO:0005634|GO:0009986|GO:0009986
CAF0006917	-0.326978	Detected	0.326977	Detected	-4.76837e-07	-0.771894	Compromised	-1.11515	Compromised	-0.943523	0.125083	14.5969	22.6	12.9226	8.15338	CAF0006917	CAF0006917	CAF0006917 (alignment of 60bp with 100.00% identity) , Description: ORF Predicted by Annotation Working Group, Location: Complement (855730..855473) in Candida albicans Ca21chr5, Gene: orf19.1105.3 , :: Next best Hit, CAL0002917 (alignment of 14bp with	ATTATTGAACCCACCCTTAAATCTAGACTATATCAACCCTCATCAGATAGCTACTATTCC	CAF0006917	orf19.1105.3		IPF26207.1|IPF20047.1|Contig4-2815_0006|orf6.2981|CAWG_04761	Ca21chr5_C_albicans_SC5314	Ortholog of Candida albicans WO-1 : CAWG_04761	CAF0006917	GO:0008150|GO:0003674|GO:0005575	GO:0003674=molecular_function	GO:0005575=cellular_component	GO:0008150=biological_process	GO:0003674|GO:0003674|GO:0008150|GO:0008150|GO:0005575|GO:0005575
CAL0001856	0.0712624	Detected	-0.0712619	Detected	2.38419e-07	1.04545	Detected	1.09873	Detected	1.07209	0.00499797	31.9697	28.4985	75.6866	62.8604	CAL0001856	CAL0001856	CAL0001856 (alignment of 60bp with 100.00% identity) , Description: Predicted ORF in Assemblies 19, 20 and 21; shows Mob2p-dependent hyphal regulation; fluconazole-induced, Location: Complement (850948..848594) in Candida albicans Ca21chr5, Gene: orf19.	GCTACTATCTGAACTCAAACCACCCAACACTACATTAAATCGTACATCAAATCTAAGATT	CAL0001856	orf19.1106		orf19.8703|IPF26190.1|IPF6342.1|Contig4-2815_0016|Contig4-2815_0017|CA1458|orf6.2982|CaO19.8703|CaO19.1106|IPF6342|CAWG_04760	Ca21chr5_C_albicans_SC5314	Protein with Mob2p-dependent hyphal regulation; fluconazole-induced	CAL0001856	GO:0008150|GO:0003674|GO:0005575	GO:0003674=molecular_function	GO:0005575=cellular_component	GO:0008150=biological_process	GO:0003674|GO:0003674|GO:0008150|GO:0008150|GO:0005575|GO:0005575
CAL0001857	0.0102105	Detected	-0.0102105	Detected	0	0.430039	Detected	0.572762	Detected	0.501401	0.0200513	4583.56	4446.75	7389.32	6529.63	CAL0001857	CAL0001857	CAL0001857 (alignment of 60bp with 100.00% identity) , Description: Predicted ORF in Assemblies 19, 20 and 21, Location: Complement (847685..847077) in Candida albicans Ca21chr5, Gene: orf19.1107 , :: Next best Hit, CAL0002736 (alignment of 15bp with 1	TGGTGCTATAGTGCCTGAATTATATACTGTGACTTCTCAACCAGAGAAAAAGGTTAAAAA	CAL0001857	orf19.1107	PAR32	orf19.8704|IPF26199.1|IPF6340.2|Contig4-2815_0018|CA1459|orf6.2983|CaO19.8704|CaO19.1107|IPF6340|CAWG_04759	Ca21chr5_C_albicans_SC5314	Ortholog(s) have cytoplasm localization	CAL0001857	GO:0008150|GO:0003674|GO:0005737	GO:0003674=molecular_function	GO:0005737=cytoplasm	GO:0008150=biological_process	GO:0003674|GO:0003674|GO:0008150|GO:0008150|GO:0005737|GO:0005737
CAL0001858	0.191604	Detected	-0.191604	Detected	0	-0.655887	Detected	-0.635093	Detected	-0.64549	0.0781515	6352.3	4792.49	4254.34	3454.71	CAL0001858	CAL0001858	CAL0001858 (alignment of 60bp with 100.00% identity) , Description: Predicted ORF in Assemblies 19, 20 and 21; caspofungin repressed; regulated by Gcn2p and Gcn4p, Location: 846299..846907 in Candida albicans Ca21chr5, Gene: orf19.1108 , :: Next best Hi	TTTGGATGGGATTCGATTTTCCAACCTAATGGATTTGAACAAACTTATGCTGAAATGGAT	CAL0001858	orf19.1108	HAM1	orf19.8705|IPF26200.1|IPF6339.1|Contig4-2815_0019|CA1460|orf6.2984|CaO19.8705|CaO19.1108|CAWG_04758	Ca21chr5_C_albicans_SC5314	Putative deoxyribonucleoside triphosphate pyrophosphohydrolase; caspofungin repressed; regulated by Gcn2p and Gcn4p	CAL0001858	GO:0036220|GO:0009217|GO:0036221|GO:0036222|GO:0009213|GO:0005634|GO:0035870|GO:0005829|GO:0008828|GO:0000088|GO:0036217|GO:0004170|GO:0047840|GO:0036219|GO:0036218	GO:0036220=ITP diphosphatase activity|GO:0036221=UTP diphosphatase activity|GO:0036222=XTP diphosphatase activity|GO:0035870=dITP diphosphatase activity|GO:0008828=dATP pyrophosphohydrolase activity|GO:0036217=dGTP diphosphatase activity|GO:0004170=dUTP diphosphatase activity|GO:0047840=dCTP diphosphatase activity|GO:0036219=GTP diphosphatase activity|GO:0036218=dTTP diphosphatase activity	GO:0005634=nucleus|GO:0005829=cytosol	GO:0009217=purine deoxyribonucleoside triphosphate catabolic process|GO:0009213=pyrimidine deoxyribonucleoside triphosphate catabolic process|GO:0000088=mitotic prophase	GO:0035870|GO:0036218|GO:0036217|GO:0047840|GO:0036220|GO:0036219|GO:0036222|GO:0036221|GO:0004170|GO:0008828|GO:0035870|GO:0036218|GO:0036217|GO:0047840|GO:0036220|GO:0036219|GO:0036222|GO:0036221|GO:0004170|GO:00088|GO:0009213|GO:0009217|GO:0009213|GO:0009217|GO:0005634|GO:0005829|GO:0005634|GO:0005829
CAL0001859	0.239377	Detected	-0.239377	Detected	0	-0.432272	Detected	-0.546061	Detected	-0.489167	0.18513	439.486	310.322	332.491	245.949	CAL0001859	CAL0001859	CAL0001859 (alignment of 60bp with 100.00% identity) , Description: Predicted ORF in Assemblies 19, 20 and 21, Location: 845545..845937 in Candida albicans Ca21chr5, Gene: orf19.1109 , :: Next best Hit, CAL0001569 (alignment of 15bp with 100.00% identi	CATACAATAGACCAACTTCAACTCCAGTTGAATTCCAACCATTATCTATAGAACCAAAAG	CAL0001859	orf19.1109		orf19.8706|IPF26205.1|IPF6338.1|Contig4-2815_0021|CA1461|orf6.2985|CaO19.8706|CaO19.1109|IPF6338|CAWG_04757	Ca21chr5_C_albicans_SC5314	Ortholog of C. parapsilosis CDC317 : CPAR2_303030, Debaryomyces hansenii CBS767 : DEHA2G07766g, Candida dubliniensis CD36 : CD36_53580 and Candida tropicalis MYA-3404 : CTRG_03189	CAL0001859	GO:0008150|GO:0003674|GO:0005575	GO:0003674=molecular_function	GO:0005575=cellular_component	GO:0008150=biological_process	GO:0003674|GO:0003674|GO:0008150|GO:0008150|GO:0005575|GO:0005575
CAL0001872	0.0499125	Detected	-0.0499125	Detected	0	0.146452	Detected	-0.0461845	Detected	0.0501337	0.689384	1584.61	1454.99	2041.76	1430	CAL0001872	CAL0001872	CAL0001872 (alignment of 60bp with 100.00% identity) , Description: Thiamine pyrophosphokinase, phosphorylates thiamine to produce the coenzyme thiamine pyrophosphate (thiamine diphosphate); active as a homodimer, Location: 844153..845136 in Candida alb	TGGAAAACGGAAATGTTGGGACAAGTCAGTTCTAGTAATCGAATAAGCGGTGAAACTGGA	CAL0001872	orf19.1110	THI80	orf19.8707|IPF6335.2|IPF6334.3|Contig4-2815_0022|Contig4-2815_0023|CA1462|orf6.2986|CaO19.1110|THI80|CAWG_04756	Ca21chr5_C_albicans_SC5314	Thiamine pyrophosphokinase, phosphorylates thiamine to produce the coenzyme thiamine pyrophosphate (thiamine diphosphate); active as a homodimer	CAL0001872	GO:0004788|GO:0005737|GO:0009229|GO:0005524	GO:0004788=thiamine diphosphokinase activity|GO:0005524=ATP binding	GO:0005737=cytoplasm	GO:0009229=thiamine diphosphate biosynthetic process	GO:0004788|GO:0005524|GO:0004788|GO:0005524|GO:0009229|GO:0009229|GO:0005737|GO:0005737
CAL0001873	0.114748	Detected	-0.114748	Detected	0	0.0613341	Detected	0.0698943	Detected	0.0656142	0.625372	1802.29	1512.61	2092.99	1685.25	CAL0001873	CAL0001873	CAL0001873 (alignment of 60bp with 100.00% identity) , Description: Predicted ORF in Assemblies 19, 20 and 21, Location: Complement (843951..843253) in Candida albicans Ca21chr5, Gene: orf19.1111 , :: Next best Hit, CAL0003663 (alignment of 19bp with 1	CACCAGTTATTCCAAGATGGGGATTGAATTTACCACCAGAAAAATATTGTTTAACTGCTA	CAL0001873	orf19.1111	TAF9	orf19.8708|IPF18669.1|IPF6333.3|Contig4-2766_0002|CA1804|orf6.2987|orf6.3463|CaO19.1111|TAF9|TAF17|IPF6333.2|CAWG_04755	Ca21chr5_C_albicans_SC5314	Ortholog(s) have chromatin binding, protein complex scaffold activity and role in RNA polymerase II transcriptional preinitiation complex assembly, histone acetylation	CAL0001873	GO:0046695|GO:0032947|GO:0005669|GO:0016573|GO:0000124|GO:0003682|GO:0051123|GO:0003677|GO:0005829	GO:0032947=protein complex scaffold|GO:0003682=chromatin binding|GO:0003677=DNA binding	GO:0046695=SLIK (SAGA-like) complex|GO:0005669=transcription factor TFIID complex|GO:0000124=SAGA complex|GO:0005829=cytosol	GO:0016573=histone acetylation|GO:0051123=RNA polymerase II transcriptional preinitiation complex assembly	GO:0003677|GO:0032947|GO:0003682|GO:0003677|GO:0032947|GO:0003682|GO:0016573|GO:0051123|GO:0016573|GO:0051123|GO:0000124|GO:0005829|GO:0046695|GO:0005669|GO:0000124|GO:0005829|GO:0046695|GO:0005669
CAL0001875	0.00545073	Detected	-0.00545073	Detected	0	-0.20463	Detected	-0.0533156	Detected	-0.128973	0.231179	2605.65	2544.62	2714.54	2413.05	CAL0001875	CAL0001875	CAL0001875 (alignment of 60bp with 100.00% identity) , Description: Predicted ORF in Assemblies 19, 20 and 21; fungal-specific (no human or murine homolog), Location: Complement (842903..840609) in Candida albicans Ca21chr5, Gene: orf19.1112 , :: Next b	ATTGTTGACATTAAGTGATTTGGTTGCTTGGGAAGGATCAGTGAAAATTAATTCTTCGGT	CAL0001875	orf19.1112	BUD7	orf19.8709|IPF26191.1|IPF6332.2|Contig4-2766_0004|Contig4-2766_0006|CA1805|orf6.3464|CaO19.1112|CaO19.8709|IPF6332|CAWG_04754	Ca21chr5_C_albicans_SC5314	Ortholog(s) have role in Golgi to plasma membrane transport, fungal-type cell wall chitin biosynthetic process and cell division site, clathrin-coated vesicle, cytosol, exomer complex, nucleus, ribosome localization	CAL0001875	GO:0034221|GO:0034044|GO:0003674|GO:0030136|GO:0005840|GO:0005634|GO:0006893|GO:0032153|GO:0005829	GO:0003674=molecular_function	GO:0034044=exomer complex|GO:0030136=clathrin-coated vesicle|GO:0005840=ribosome|GO:0005634=nucleus|GO:0032153=cell division site|GO:0005829=cytosol	GO:0034221=fungal-type cell wall chitin biosynthetic process|GO:0006893=Golgi to plasma membrane transport	GO:0003674|GO:0003674|GO:0006893|GO:0034221|GO:0006893|GO:0034221|GO:0005840|GO:0005634|GO:0005829|GO:0030136|GO:0032153|GO:0034044|GO:0005840|GO:0005634|GO:0005829|GO:0030136|GO:0032153|GO:0034044
CAL0001877	0.0724473	Detected	-0.0724473	Detected	0	0.778714	Detected	0.651755	Detected	0.715234	0.0176581	100.161	89.139	196.937	144.354	CAL0001877	CAL0001877	CAL0001877 (alignment of 60bp with 100.00% identity) , Description: Predicted ORF in Assemblies 19, 20 and 21; possibly spurious ORF (Annotation Working Group prediction), Location: Complement (840136..839369) in Candida albicans Ca21chr5, Gene: orf19.1	CCTGAACCCGATGCAGTGGAAACTAAATTAGTTTTAAATGATGTGCTAAAGGAATTCAAC	CAL0001877	orf19.1113		orf19.8710|IPF26197.1|IPF6329.2|Contig4-2766_0009|CA1806|orf6.3465|CaO19.8710|CaO19.1113|IPF6329|CAWG_04753	Ca21chr5_C_albicans_SC5314	Ortholog of Debaryomyces hansenii CBS767 : DEHA2G07854g, Candida dubliniensis CD36 : CD36_53540, Pichia stipitis Pignal : PICST_32162 and Spathaspora passalidarum NRRL Y-27907 : SPAPADRAFT_50795	CAL0001877	GO:0008150|GO:0003674|GO:0005575	GO:0003674=molecular_function	GO:0005575=cellular_component	GO:0008150=biological_process	GO:0003674|GO:0003674|GO:0008150|GO:0008150|GO:0005575|GO:0005575
CAL0001879	0.0240541	Detected	-0.0240541	Detected	0	0.0073266	Detected	0.0881963	Detected	0.0477614	0.416862	2379.92	2264.99	2834.96	2400	CAL0001879	CAL0001879	CAL0001879 (alignment of 60bp with 100.00% identity) , Description: Predicted ORF in Assemblies 19, 20 and 21, Location: 838594..839178 in Candida albicans Ca21chr5, Gene: orf19.1114 , :: Next best Hit, CAL0002037 (alignment of 16bp with 100.00% identi	TTGGAGGTGGGTTTTATTATGGTACGGAAACGTCACAACATAAACAAACTAGAGAAGATA	CAL0001879	orf19.1114	RCF1	orf19.8711|IPF26204.1|IPF6328.2|Contig4-2766_0010|Contig4-2766_0011|CA1807|orf6.3466|IPF6328|CAWG_04752	Ca21chr5_C_albicans_SC5314	Membrane-localized protein	CAL0001879	GO:0033617|GO:0097249|GO:0003674|GO:0005886|GO:0031305|GO:0097250|GO:0005751	GO:0003674=molecular_function	GO:0097249=mitochondrial respiratory chain supercomplex|GO:0005886=plasma membrane|GO:0031305=integral to mitochondrial inner membrane|GO:0005751=mitochondrial respiratory chain complex IV	GO:0033617=mitochondrial respiratory chain complex IV assembly|GO:0097250=mitochondrial respiratory chain supercomplex assembly	GO:0003674|GO:0003674|GO:0033617|GO:0097250|GO:0033617|GO:0097250|GO:0005886|GO:0097249|GO:0005751|GO:0031305|GO:0005886|GO:0097249|GO:0005751|GO:0031305
CAL0001880	0.0779882	Detected	-0.0779882	Detected	0	-1.46224	Detected	-0.542083	Detected	-1.00216	0.164818	3209.86	2834.78	1330	2014.5	CAL0001880	CAL0001880	CAL0001880 (alignment of 60bp with 100.00% identity) , Description: Putative guanylate kinase; identified in extracts from biofilm and planktonic cells; protein level decreased in stationary phase cultures, Location: 837684..838256 in Candida albicans C	CAAACTGGTGCTCATGATAAAATAATCGTTAATGACGATTTGGACAAAGCTTATGCTGAA	CAL0001880	orf19.1115	GUK1	orf19.8712|IPF26196.1|IPF6326.2|Contig4-2766_0012|CA1808|orf6.3467|CaO19.8712|CaO19.1115|CAWG_04751	Ca21chr5_C_albicans_SC5314	Putative guanylate kinase; identified in extracts from biofilm and planktonic cells; protein level decrease in stationary phase cultures; Hap43p-induced gene	CAL0001880	GO:0005737|GO:0004385|GO:0005634|GO:0006163	GO:0004385=guanylate kinase activity	GO:0005737=cytoplasm|GO:0005634=nucleus	GO:0006163=purine nucleotide metabolic process	GO:0004385|GO:0004385|GO:0006163|GO:0006163|GO:0005634|GO:0005737|GO:0005634|GO:0005737
CAL0001882	0.174035	Detected	-0.174035	Detected	0	0.224344	Detected	-0.459471	Detected	-0.117563	0.788234	1873.5	1448.31	2337.86	1164.9	CAL0001882	CAL0001882	CAL0001882 (alignment of 60bp with 100.00% identity) , Description: Predicted ORF in Assemblies 19, 20 and 21; possibly spurious ORF (Annotation Working Group prediction), Location: Complement (836896..836270) in Candida albicans Ca21chr5, Gene: orf19.1	TGAAAATACAGCTATTAAGTTACCACCCATTAGTACGCTACCTATGCCGTTTCCAGAACA	CAL0001882	orf19.1116		orf19.8713|IPF26198.1|IPF6325.2|Contig4-2766_0014|CA1809|orf6.3468|CaO19.1116|CaO19.8713|IPF6325|CAWG_04750	Ca21chr5_C_albicans_SC5314	Planktonic growth-induced gene	CAL0001882	GO:0008150|GO:0003674|GO:0005575	GO:0003674=molecular_function	GO:0005575=cellular_component	GO:0008150=biological_process	GO:0003674|GO:0003674|GO:0008150|GO:0008150|GO:0005575|GO:0005575
CAL0001883	0.456797	Detected	-0.456797	Detected	0	-1.46484	Detected	-1.27383	Detected	-1.36933	0.0991704	984	514	313	286	CAL0001883	CAL0001883	NOTE: Has potential for cross hybridization with other orfs; CAL0001883 (alignment 60 bp with 100 % identity) , Description: Predicted ORF in Assemblies 19, 20 and 21; similar to Candida boidinii formate dehydrogenase; virulence-group-correlated expressio	GATATCGCTGCCGTTGCCAAAGATGAATTTGATATGGAAGATAAAGTTTTTGCCACTATT	CAL0001883	orf19.1117		orf19.8714|IPF19255.2|IPF6323.2|Contig4-2766_0017|CA1810|orf6.3469|orf6.485|FDH2|FDH98|CaO19.1117|CAWG_04749	Ca21chr5_C_albicans_SC5314	Protein similar to Candida boidinii formate dehydrogenase; virulence-group-correlated expression; Hap43p-repressed gene	CAL0001883	GO:0051287|GO:0005575|GO:0055114|GO:0016616	GO:0051287=NAD binding|GO:0016616=oxidoreductase activity, acting on the CH-OH group of donors, NAD or NADP as acceptor	GO:0005575=cellular_component	GO:0055114=oxidation-reduction process	GO:0016616|GO:0051287|GO:0055114|GO:0005575
CAL0001911	0.0318899	Detected	-0.0318899	Detected	0	0.173556	Detected	0.753912	Detected	0.463734	0.2531	5379.99	5064.88	7152.34	8559.98	CAL0001911	CAL0001911	CAL0001911 (alignment of 60bp with 100.00% identity) , Description: Induced by mating factor in MTLa/MTLa opaque cells; greater mRNA abundance observed in a cyr1 homozygous null mutant than in wild type; filament induced; regulated by Nrg1p, Rfg1p, Tup1p	TCTGGCTCATCAAATGCTTCAGCTAGTGTTAATGCTAATTCAGGAAACTCTATAGATTTG	CAL0001911	orf19.1120	FAV2	orf19.8718|IPF26203.1|IPF13879.2|Contig4-1995_0001|CA1812|orf6.3472|CaO19.1120|IPF13879|CAWG_04747	Ca21chr5_C_albicans_SC5314	Adhesin-like protein; induced by mating factor in MTLa/MTLa opaque cells; induced in cyr1 mutant; filament induced; regulated by Nrg1p, Rfg1p, Tup1p; induced in oralpharyngeal candidasis	CAL0001911	GO:0008150|GO:0003674|GO:0005575	GO:0003674=molecular_function	GO:0005575=cellular_component	GO:0008150=biological_process	GO:0003674|GO:0003674|GO:0008150|GO:0008150|GO:0005575|GO:0005575
CAL0001913	-0.10187	Detected	0.10187	Detected	0	0.222197	Detected	0.237299	Detected	0.229748	0.153443	3489.99	3954.97	5265	4258.58	CAL0001913	CAL0001913	CAL0001913 (alignment of 60bp with 100.00% identity) , Description: Predicted ORF in Assemblies 19, 20 and 21, Location: 825621..826442 in Candida albicans Ca21chr5, Gene: orf19.1121 , :: Next best Hit, CAL0001573 (alignment of 15bp with 100.00% identi	ATGGTTCATGGGGATTTGATAACTAAAGAAGCCAAAAGAACGCTTTCTGATGTACATTTG	CAL0001913	orf19.1121		orf19.8719|IPF2329.1|IPF13871.1|Contig4-1915_0003|Contig4-1995_0007|Contig4-1995_0008|CA1813|orf6.1196|orf6.3473|CaO19.1121|HWH2|IPF2329|CAWG_04746	Ca21chr5_C_albicans_SC5314	Ortholog of Candida dubliniensis CD36 : CD36_53470, Spathaspora passalidarum NRRL Y-27907 : SPAPADRAFT_55715, Candida tropicalis MYA-3404 : CTRG_05538 and Candida albicans WO-1 : CAWG_04746	CAL0001913	GO:0008150|GO:0003674|GO:0005575	GO:0003674=molecular_function	GO:0005575=cellular_component	GO:0008150=biological_process	GO:0003674|GO:0003674|GO:0008150|GO:0008150|GO:0005575|GO:0005575
CAL0001916	-1.23831	Compromised	1.23831	Detected	0	0.701591	Detected	0.66968	Detected	0.685635	0.635457	7.34249	40.2132	33.9495	26.5795	CAL0001916	CAL0001916	CAL0001916 (alignment of 60bp with 100.00% identity) , Description: Predicted ORF in Assemblies 19, 20 and 21; transcription is induced in response to alpha pheromone in SpiderM medium, Location: 824264..825106 in Candida albicans Ca21chr5, Gene: orf19.	GTAATTGAAAAGGATGGGAAAGATGCCTGGAAAAAGTTATTTGCTAGCTCCCTTGTTTAG	CAL0001916	orf19.1122		orf19.8720|IPF2328.2|IPF13870.2|Contig4-1915_0004|CA0360|orf6.1197|orf6.3474|HWH1|CaO19.1122|IPF2328|CAWG_04745	Ca21chr5_C_albicans_SC5314	Predicted ORF in Assemblies 19, 20 and 21; transcription is induced in response to alpha pheromone in SpiderM medium	CAL0001916	GO:0008150|GO:0003674|GO:0005575	GO:0003674=molecular_function	GO:0005575=cellular_component	GO:0008150=biological_process	GO:0003674|GO:0003674|GO:0008150|GO:0008150|GO:0005575|GO:0005575
CAL0001918	0.0415325	Compromised	-0.0415325	Compromised	0	0.0191126	Compromised	0.897662	Compromised	0.458387	0.407975	4.78493	4.44486	5.67738	8.35482	CAL0001918	CAL0001918	CAL0001918 (alignment of 60bp with 100.00% identity) , Description: Predicted ORF in Assemblies 19, 20 and 21, Location: Complement (823867..823514) in Candida albicans Ca21chr5, Gene: orf19.1123 , :: Next best Hit, CAL0004102 (alignment of 15bp with 1	AGAAGGGAATGAGAAGACTATTTCATGCACGATGGACAAATTGATGTTGCACCGTTTTTT	CAL0001918	orf19.1123		orf19.8721|IPF26211.1|IPF29575.1|orf6.1198|CaO19.1123|CaO19.8721|CAWG_04744	Ca21chr5_C_albicans_SC5314	Ortholog of Candida albicans WO-1 : CAWG_04744
CAL0001920	-0.0723515	Detected	0.0723515	Detected	0	0.649356	Detected	0.980798	Detected	0.815077	0.0458591	467.644	508.701	929.376	936.021	CAL0001920	CAL0001920	CAL0001920 (alignment of 60bp with 100.00% identity) , Description: Predicted ORF in Assemblies 19, 20 and 21, Location: Complement (823432..822548) in Candida albicans Ca21chr5, Gene: orf19.1124 , :: Next best Hit, CAL0003154 (alignment of 16bp with 1	CTTTTGAACTTGGCTAAGGAATTTGAAGGAGTTGAATTGGGTTATGCTTTAGATGGTTAA	CAL0001920	orf19.1124		orf19.8722|IPF26195.1|IPF2326.2|CA0361|orf6.1199|CaO19.8722|CaO19.1124|IPF2326|CAWG_04743	Ca21chr5_C_albicans_SC5314	Late-stage biofilm-induced gene	CAL0001920	GO:0008150|GO:0003674|GO:0005575	GO:0003674=molecular_function	GO:0005575=cellular_component	GO:0008150=biological_process	GO:0003674|GO:0003674|GO:0008150|GO:0008150|GO:0005575|GO:0005575
CAF0006918	0.198856	Detected	-0.198856	Detected	0	-1.4913	Detected	-0.66482	Detected	-1.07806	0.14311	11300	8440	4220	5990	CAF0006918	CAF0006918	NOTE: Has potential for cross hybridization with other orfs; CAF0006918 (alignment 60 bp with 100 % identity) , Description: Predicted ORF in Assemblies 19, 20 and 21, Location: Complement (822235..821336) in Candida albicans Ca21chr5, Gene: orf19.1124.2	AACAATTGTTAGAGATTGAGTCGATCAGACAGGAACAGGCATACACACCCAACACACCGT	CAF0006918	orf19.1124.2	DPH5	IPF26215.1|IPF2323.3|IPF2322.2|orf19.6682|CA4284|CAWG_04742	Ca21chr5_C_albicans_SC5314	Ortholog(s) have diphthine synthase activity, role in peptidyl-diphthamide biosynthetic process from peptidyl-histidine and cytosol, nucleus localization	CAF0006918	GO:0004164|GO:0005634|GO:0017183|GO:0005829	GO:0004164=diphthine synthase activity	GO:0005634=nucleus|GO:0005829=cytosol	GO:0017183=peptidyl-diphthamide biosynthetic process from peptidyl-histidine	GO:0004164|GO:0017183|GO:0005634|GO:0005829
CAL0001961	-0.0857253	Detected	0.0857253	Detected	0	0.0153155	Detected	0.0227628	Detected	0.0190392	0.844999	1745.17	1933.91	2255.66	1814.83	CAL0001961	CAL0001961	CAL0001961 (alignment of 60bp with 100.00% identity) , Description: Predicted ORF in Assemblies 19, 20 and 21; expression in S. cerevisiae flo8 and flo11 mutants suggests a role in regulation of adhesion factors, Location: Complement (771005..767142) in	CAAACCACCAATAAAGCCAATTTACGTGCTGCTTTTGTTGAAGGCAGTTTTGGTATTTAA	CAL0001961	orf19.1133	MSB1	orf19.8726|IPF6172.3|IPF29571.1|Contig4-2952_0004|CA0525|orf6.1506|MSB1.5eoc|IPF6172.2|CAWG_01020	Ca21chr1_C_albicans_SC5314	Putative regulator of transcription; expression in S. cerevisiae flo8 and flo11 mutants suggests a role in regulation of adhesion factors	CAL0001961	GO:0005739|GO:0003674|GO:0006355|GO:0044406|GO:0030010|GO:0007155	GO:0003674=molecular_function	GO:0005739=mitochondrion	GO:0006355=regulation of transcription, DNA-dependent|GO:0044406=adhesion to host|GO:0030010=establishment of cell polarity|GO:0007155=cell adhesion	GO:0003674|GO:0044406|GO:0007155|GO:0006355|GO:0030010|GO:0005739
CAL0001964	-0.104881	Detected	0.104881	Detected	0	-0.0787401	Detected	-0.277245	Detected	-0.177992	0.342944	1868.03	2125.77	2292.31	1598.96	CAL0001964	CAL0001964	CAL0001964 (alignment of 60bp with 100.00% identity) , Description: Putative transcription factor with beta-barrel DNA-binding motif; mutation causes marginal increase in caspofungin sensitivity, Location: 2585659..2588094 in Candida albicans Ca21chr1,	GGTTTTCAGTGGATCAATTGAAGGCATTTAGAAGAAAATATCCTGATGTCAAATCAGCTA	CAL0001964	orf19.1135	CAS1	orf19.8728|IPF19699.2|IPF20050.1|IPF20065.1|Contig4-2562_0005|CA0779|orf6.1571|orf6.1909|orf6.781|YKU701|orf19.3491|CaO19.1135|CAWG_00257	Ca21chr1_C_albicans_SC5314	Putative transcription factor with beta-barrel DNA-binding motif; involved in telomerase regulation and telomere protection; mutation causes marginal increase in caspofungin sensitivity	CAL0001964	GO:0006355|GO:0003700|GO:0006348|GO:0003723|GO:0030466|GO:0005635|GO:0006303|GO:0003677|GO:0006333|GO:0043564|GO:0004003|GO:0000723|GO:0000727	GO:0003700=sequence-specific DNA binding transcription factor activity|GO:0003723=RNA binding|GO:0003677=DNA binding|GO:0004003=ATP-dependent DNA helicase activity	GO:0005635=nuclear envelope|GO:0043564=Ku70:Ku80 complex	GO:0006355=regulation of transcription, DNA-dependent|GO:0006348=chromatin silencing at telomere|GO:0030466=chromatin silencing at silent mating-type cassette|GO:0006303=double-strand break repair via nonhomologous end joining|GO:0006333=chromatin assembly or disassembly|GO:0000723=telomere maintenance|GO:0000727=double-strand break repair via break-induced replication	GO:0003700|GO:0003677|GO:0004003|GO:0003723|GO:0006355|GO:0000723|GO:0030466|GO:0006333|GO:0000727|GO:0006348|GO:0006303|GO:0043564|GO:0005635
CAL0001966	0.0605993	Compromised	-0.0605993	Compromised	0	4.64309	Detected	3.19572	Detected	3.9194	0.0326591	5.33376	4.82543	154	45.2	CAL0001966	CAL0001966	CAL0001966 (alignment of 60bp with 100.00% identity) , Description: Predicted ORF in Assemblies 19, 20 and 21, Location: Complement (2585384..2584947) in Candida albicans Ca21chr1, Gene: orf19.1136 , :: Next best Hit, CAL0002741 (alignment of 13bp with	CAAGAACTACTGAAAAAGAAAATTCTAAATCGATTAAGTTATTTAGATGGATTAGATTAA	CAL0001966	orf19.1136	APS2	orf19.8729|IPF16570.2|IPF4688.1|Contig4-2562_0006|CA0568|orf6.1572|orf6.782|APS2|CaO19.1136|CAWG_00258	Ca21chr1_C_albicans_SC5314	Ortholog(s) have cytosol, nucleus localization	CAL0001966	GO:0008565|GO:0005634|GO:0016192|GO:0006886|GO:0030117|GO:0005829	GO:0008565=protein transporter activity	GO:0005634=nucleus|GO:0030117=membrane coat|GO:0005829=cytosol	GO:0016192=vesicle-mediated transport|GO:0006886=intracellular protein transport	GO:0008565|GO:0006886|GO:0016192|GO:0030117|GO:0005634|GO:0005829
CAL0001967	0.210932	Detected	-0.210932	Detected	0	-0.763055	Detected	-0.524287	Detected	-0.643671	0.117349	333.248	244.771	204.45	193.101	CAL0001967	CAL0001967	CAL0001967 (alignment of 60bp with 100.00% identity) , Description: Predicted ORF in Assemblies 19, 20 and 21, Location: 2584210..2584884 in Candida albicans Ca21chr1, Gene: orf19.1137 , :: Next best Hit, CAL0000155 (alignment of 15bp with 100.00% iden	TTCTTACGTTAGATTTAGAAGAGATAAGTAAACGAAAAGGATGGGGTGATGAACGTTATG	CAL0001967	orf19.1137	CDC8	orf19.8730|IPF16571.2|IPF4687.1|Contig4-2562_0007|CA0569|orf6.1573|orf6.783|CDC8|CaO19.1137|CAWG_00259	Ca21chr1_C_albicans_SC5314	Ortholog(s) have thymidylate kinase activity, uridylate kinase activity, role in dTDP biosynthetic process, dTTP biosynthetic process, dUDP biosynthetic process, nucleotide phosphorylation and cytosol, nucleus localization	CAL0001967	GO:0009041|GO:0046939|GO:0005634|GO:0006233|GO:0006227|GO:0006235|GO:0005524|GO:0004798|GO:0005829	GO:0009041=uridylate kinase activity|GO:0005524=ATP binding|GO:0004798=thymidylate kinase activity	GO:0005634=nucleus|GO:0005829=cytosol	GO:0046939=nucleotide phosphorylation|GO:0006233=dTDP biosynthetic process|GO:0006227=dUDP biosynthetic process|GO:0006235=dTTP biosynthetic process	GO:0005524|GO:0004798|GO:0009041|GO:0006233|GO:0046939|GO:0006235|GO:0006227|GO:0005634|GO:0005829
CAL0001968	-0.160867	Detected	0.160867	Detected	0	0.339601	Detected	0.211204	Detected	0.275402	0.252787	2910.43	3579.29	4961.74	3633.31	CAL0001968	CAL0001968	CAL0001968 (alignment of 60bp with 100.00% identity) , Description: Predicted ORF in Assemblies 19, 20 and 21, Location: Complement (2581086..2578162) in Candida albicans Ca21chr1, Gene: orf19.1139 , :: Next best Hit, CAL0000621 (alignment of 18bp with	CTTCAGGTGGTAACAACAGCAATAATCACGTCAATGAAAAGAAGAAAAAGGGAATTTTTG	CAL0001968	orf19.1139	SVL3	orf19.8732|IPF17015.2|IPF29554.1|Contig4-2171_0008|CA0570|orf6.1575|orf6.2177|SVL3|CaO19.1139|CAWG_00260	Ca21chr1_C_albicans_SC5314	Ortholog(s) have role in endocytosis and cellular bud neck, cytoplasm localization	CAL0001968	GO:0050661|GO:0005737|GO:0005935|GO:0006897|GO:0055114|GO:0016616	GO:0050661=NADP binding|GO:0016616=oxidoreductase activity, acting on the CH-OH group of donors, NAD or NADP as acceptor	GO:0005737=cytoplasm|GO:0005935=cellular bud neck	GO:0006897=endocytosis|GO:0055114=oxidation-reduction process	GO:0050661|GO:0016616|GO:0055114|GO:0006897|GO:0005935|GO:0005737
CAL0002994	0.0382524	Detected	-0.0382524	Detected	0	0.361474	Detected	0.326505	Detected	0.34399	0.0146223	77.8118	72.611	117.318	91.6556	CAL0002994	CAL0002994	CAL0002994 (alignment of 60bp with 100.00% identity) , Description: Predicted ORF in Assemblies 19, 20 and 21, Location: Complement (212847..211849) in Candida albicans Ca21chr6, Gene: orf19.114 , :: Next best Hit, CAL0000022 (alignment of 23bp with 95	TTGGGTTATATACTGTTGAAGATAATTCAAACGAAGATGAAGATGACGAGGATGAGGAAC	CAL0002994	orf19.114		orf19.7762|IPF19622.2|IPF19689.1|orf6.1182|Contig4-2149_0004|CA6312|CaO19.114|IPF19622.3f|CAWG_05252	Ca21chr6_C_albicans_SC5314	Ortholog of C. parapsilosis CDC317 : CPAR2_603230, Debaryomyces hansenii CBS767 : DEHA2E21142g, Candida dubliniensis CD36 : CD36_61190 and Pichia stipitis Pignal : psti_CGOB_00078	CAL0002994	GO:0008150|GO:0003674|GO:0005575	GO:0003674=molecular_function	GO:0005575=cellular_component	GO:0008150=biological_process	GO:0003674|GO:0008150|GO:0005575
CAL0001998	0.146841	Detected	-0.146841	Detected	0	-0.100306	Detected	-0.351819	Detected	-0.226062	0.362782	5966.15	4789.33	6057.82	4073.08	CAL0001998	CAL0001998	CAL0001998 (alignment of 60bp with 100.00% identity) , Description: Predicted ORF in Assemblies 19, 20 and 21; possibly spurious ORF (Annotation Working Group prediction), Location: Complement (2577590..2576964) in Candida albicans Ca21chr1, Gene: orf19	GGTTAGAACAAGCTCAAGTGGGTGTTTATCAAGCAGTTCATGATTTTAGAAAATTGGTAA	CAL0001998	orf19.1140		orf19.8733|IPF17749.2|IPF13160.2|Contig4-2171_0003|CA0955|orf6.2176|CaO19.1140|IPF13160|CAWG_00261	Ca21chr1_C_albicans_SC5314	Ortholog of C. parapsilosis CDC317 : CPAR2_804530, Candida tenuis NRRL Y-1498 : CANTEDRAFT_99945, Debaryomyces hansenii CBS767 : DEHA2F10296g and Candida dubliniensis CD36 : CD36_11050	CAL0001998	GO:0008150|GO:0003674|GO:0005575	GO:0003674=molecular_function	GO:0005575=cellular_component	GO:0008150=biological_process	GO:0003674|GO:0008150|GO:0005575
CAL0002003	-0.0860562	Detected	0.0860562	Detected	0	0.226864	Detected	0.388601	Detected	0.307733	0.121087	2394.75	2654.96	3584.91	3209.86	CAL0002003	CAL0002003	CAL0002003 (alignment of 60bp with 100.00% identity) , Description: Predicted ORF in Assemblies 19, 20 and 21; transcription is induced in response to alpha pheromone in SpiderM medium, Location: 2574824..2576743 in Candida albicans Ca21chr1, Gene: orf1	GTGTTACTTGTCATTGGAGCGATCTCATTTGTTTACACAACCTATGAAATATTGTTCACT	CAL0002003	orf19.1142	AVT4	orf19.8735|IPF26160.1|IPF13162.2|Contig4-2171_0004|Contig4-2171_0005|CA0954|orf6.2174|AVT41|CaO19.1142|CaO19.8735|IPF13162|CAWG_00262	Ca21chr1_C_albicans_SC5314	Putative vacuolar transporter of large neutral amino acids; transcription is induced in response to alpha pheromone in SpiderM medium	CAL0002003	GO:0006995|GO:0005302|GO:0005783|GO:0032974|GO:0015188|GO:0000329|GO:0015186	GO:0005302=L-tyrosine transmembrane transporter activity|GO:0015188=L-isoleucine transmembrane transporter activity|GO:0015186=L-glutamine transmembrane transporter activity	GO:0005783=endoplasmic reticulum|GO:0000329=fungal-type vacuole membrane	GO:0006995=cellular response to nitrogen starvation|GO:0032974=amino acid export from vacuole	GO:0015188|GO:0015186|GO:0005302|GO:0032974|GO:0006995|GO:0000329|GO:0005783
CAL0002005	-0.0231442	Detected	0.0231442	Detected	0	-0.351728	Detected	-0.293047	Detected	-0.322388	0.0131716	1244.99	1264.99	1194.74	995.995	CAL0002005	CAL0002005	CAL0002005 (alignment of 60bp with 100.00% identity) , Description: Predicted ORF in Assemblies 19, 20 and 21, Location: 2572640..2573824 in Candida albicans Ca21chr1, Gene: orf19.1143 , :: Next best Hit, CAL0001526 (alignment of 20bp with 95.00% ident	CAACGAATGCAATTAAGACAGTTGAATTATGAACCAACACCAGAACCAGACAAAGCTTAG	CAL0002005	orf19.1143		orf19.8736|IPF26165.1|IPF20069.1|CA6246|orf6.2173|CaO19.8736|CaO19.1143|IPF20069|CAWG_00263	Ca21chr1_C_albicans_SC5314	Ortholog of Pichia stipitis Pignal : PICST_30878, Spathaspora passalidarum NRRL Y-27907 : SPAPADRAFT_60017, Candida guilliermondii ATCC 6260 : PGUG_05223 and Candida tropicalis MYA-3404 : CTRG_01052	CAL0002005	GO:0008150|GO:0003674|GO:0005575	GO:0003674=molecular_function	GO:0005575=cellular_component	GO:0008150=biological_process	GO:0003674|GO:0008150|GO:0005575
CAL0002006	0.0491743	Detected	-0.0491743	Detected	0	-0.520607	Detected	-0.601173	Detected	-0.56089	0.0126022	3883.01	3569.03	3152.6	2386.36	CAL0002006	CAL0002006	CAL0002006 (alignment of 60bp with 100.00% identity) , Description: Predicted ORF in Assemblies 19, 20 and 21, Location: 2568844..2572209 in Candida albicans Ca21chr1, Gene: orf19.1144 , :: Next best Hit, CAL0002783 (alignment of 14bp with 100.00% iden	TGGTATGAGAAAGCATATAAAATGGGAAACCGAGAGGCTGGTAGGAAATTAGGATACTCA	CAL0002006	orf19.1144		orf19.8737|IPF26180.1|IPF13166.3|Contig4-2773_0012|CA0953|orf6.2172|orf6.2787|CaO19.1144|IPF13166|IPF13166.3eoc|IPF13166.2|CAWG_00264	Ca21chr1_C_albicans_SC5314	Early-stage biofilm-induced gene	CAL0002006	GO:0008150|GO:0003674|GO:0005575	GO:0003674=molecular_function	GO:0005575=cellular_component	GO:0008150=biological_process	GO:0003674|GO:0008150|GO:0005575
CAL0002008	0.0241327	Compromised	-0.0241318	Compromised	4.76837e-07	-0.796335	Compromised	-0.78882	Compromised	-0.792578	0.000948193	10.1146	9.62518	6.90217	5.55351	CAL0002008	CAL0002008	CAL0002008 (alignment of 60bp with 100.00% identity) , Description: Predicted ORF in Assemblies 19, 20 and 21, Location: 2568243..2568611 in Candida albicans Ca21chr1, Gene: orf19.1146 , :: Next best Hit, CAL0001239 (alignment of 14bp with 100.00% iden	TCGATCTCGTTCTGAGGATTTTAATGAATTGCCAATCCTTTCAATAGGTGATGAAACTTT	CAL0002008	orf19.1146		IPF29564.1|CaO19.1146|CAWG_00265	Ca21chr1_C_albicans_SC5314	Ortholog of Candida albicans WO-1 : CAWG_00265	CAL0002008	GO:0008150|GO:0003674|GO:0005575	GO:0003674=molecular_function	GO:0005575=cellular_component	GO:0008150=biological_process	GO:0003674|GO:0008150|GO:0005575
CAL0002009	-0.162655	Detected	0.162654	Detected	-2.38419e-07	-0.893088	Detected	-0.105028	Detected	-0.499058	0.362323	39.8826	49.1699	28.9682	40.038	CAL0002009	CAL0002009	CAL0002009 (alignment of 60bp with 100.00% identity) , Description: Predicted ORF in Assemblies 19, 20 and 21, Location: Complement (2565578..2564787) in Candida albicans Ca21chr1, Gene: orf19.1148 , :: Next best Hit, CAL0004566 (alignment of 20bp with	AGGGTAAAACCAAGTTCTGGAATTCTGCTATTGACGATAAAGGTGCTTTCAAGATTTATG	CAL0002009	orf19.1148		orf19.8740|IPF19912.1|IPF29559.1|Contig4-2773_0009|CA1334|orf6.2784|CaO19.1148|CIS312|IPF19912|CAWG_00266	Ca21chr1_C_albicans_SC5314	Ortholog of Candida dubliniensis CD36 : CD36_11020 and Candida albicans WO-1 : CAWG_00266	CAL0002009	GO:0008150|GO:0003674|GO:0005575	GO:0003674=molecular_function	GO:0005575=cellular_component	GO:0008150=biological_process	GO:0003674|GO:0008150|GO:0005575
CAL0002996	0.0577331	Detected	-0.0577331	Detected	0	0.253788	Detected	0.108711	Detected	0.18125	0.189762	30.8143	27.9886	42.5394	30.792	CAL0002996	CAL0002996	CAL0002996 (alignment of 60bp with 100.00% identity) , Description: Predicted ORF in Assemblies 19, 20 and 21; possibly spurious ORF (Annotation Working Group prediction), Location: Complement (213969..213048) in Candida albicans Ca21chr6, Gene: orf19.1	GGTCATGATAATGAGGATGGGTATAATAGTGTTAAGGATTGGCTTTTGGATATAGATTAC	CAL0002996	orf19.115		IPF19623.1|orf6.1183|Contig4-2149_0006|Contig4-2149_0007|CA0484|CaO19.115|IPF19622.5f|IPF19622|orf6.1446|IPF19622.1	Ca21chr6_C_albicans_SC5314	Has domain(s) with predicted intracellular localization	CAL0002996	GO:0005622|GO:0008150|GO:0003674	GO:0003674=molecular_function	GO:0005622=intracellular	GO:0008150=biological_process	GO:0003674|GO:0008150|GO:0005622
CAL0002036	0.0308518	Detected	-0.0308518	Detected	0	0.100017	Detected	0.348602	Detected	0.224309	0.221952	3218.45	3034.3	4069	3869.36	CAL0002036	CAL0002036	CAL0002036 (alignment of 60bp with 100.00% identity) , Description: Predicted ORF in Assemblies 19, 20 and 21; regulated by Gcn2p and Gcn4p, Location: 2561059..2562477 in Candida albicans Ca21chr1, Gene: orf19.1150 , :: Next best Hit, CAL0000531 (alignm	AATGATAATTCAACAACAAACAACTCCTGGAATTGGTTAGACTTTAGTCCCGCTGCATAA	CAL0002036	orf19.1150		orf19.8743|IPF26163.1|IPF11716.1|Contig4-2773_0006|CA1332|orf6.2781|CaO19.8743|CaO19.1150|IPF11716|CAWG_00268	Ca21chr1_C_albicans_SC5314	Oral infection upregulated gene; mutant has reduced capacity to damage oral epithelial cells; regulated by Gcn2p and Gcn4p	CAL0002036	GO:0043565|GO:0006355|GO:0003700|GO:0008270|GO:0005575	GO:0043565=sequence-specific DNA binding|GO:0003700=sequence-specific DNA binding transcription factor activity|GO:0008270=zinc ion binding	GO:0005575=cellular_component	GO:0006355=regulation of transcription, DNA-dependent	GO:0003700|GO:0043565|GO:0008270|GO:0006355|GO:0005575
CAF0006919	0.113752	Detected	-0.113752	Detected	0	-0.38868	Detected	-0.17004	Detected	-0.27936	0.218624	508.997	427.777	433.001	403.298	CAF0006919	CAF0006919	CAF0006919(alignment 60bp with 100.00% identity) , Description: ORF Predicted by Annotation Working Group, Location: Complement (2559483..2559262) in Candida albicans Ca21chr1, Gene: orf19.1150.1 , :: Next best hit , location within target gene 120-179	CGGTGCATTGGCTCATCACCATCATCTACTTTTATACAATTCACTAATAACAAATGAACA	CAF0006919	orf19.1150.1		IPF26154.1|IPF11714.1|CA1331|IPF11714|CAWG_00269	Ca21chr1_C_albicans_SC5314	Ortholog of C. parapsilosis CDC317 : CPAR2_804585, Debaryomyces hansenii CBS767 : DEHA2F10406g, Candida dubliniensis CD36 : CD36_10990 and Pichia stipitis Pignal : psti_CGOB_00017	CAF0006919	GO:0008150|GO:0003674|GO:0005575	GO:0003674=molecular_function	GO:0005575=cellular_component	GO:0008150=biological_process	GO:0003674|GO:0003674|GO:0008150|GO:0008150|GO:0005575|GO:0005575
CAL0002042	-0.0339408	Detected	0.0339408	Detected	0	-0.113466	Detected	0.208742	Detected	0.0476379	0.799554	55328.3	57065	63099.9	63145.6	CAL0002042	CAL0002042	CAL0002042 (alignment of 60bp with 100.00% identity) , Description: Predicted ORF in Assemblies 19, 20 and 21; regulated by Gcn2p and Gcn4p; induced in core stress response, Location: 2558395..2559192 in Candida albicans Ca21chr1, Gene: orf19.1152 , ::	GAGGTTTCTGATGAAAGAGCACCATTATTGGTTGAAGTCCAAGAAACTGTCACCGAATAA	CAL0002042	orf19.1152		orf19.8744|IPF11713.1|IPF29561.1|IPF19733.2|Contig4-2773_0002|CA1330|CA6184|orf6.2780|orf6.3127|orf19.1151|CaO19.1152|IPF11713.5f|CAWG_00270	Ca21chr1_C_albicans_SC5314	Late-stage biofilm-induced gene; regulated by Gcn2p and Gcn4p; induced in core stress response	CAL0002042	GO:0008150|GO:0003674|GO:0005575	GO:0003674=molecular_function	GO:0005575=cellular_component	GO:0008150=biological_process	GO:0003674|GO:0008150|GO:0005575
CAL0002044	-0.000144005	Detected	0.000144005	Detected	0	0.0578232	Detected	-0.0282965	Detected	0.0147634	0.76439	22199.8	21848.6	27849.6	20999.8	CAL0002044	CAL0002044	CAL0002044 (alignment of 60bp with 100.00% identity) , Description: Protein described as glutamate decarboxylase; macrophage-downregulated orf; alkaline downregulated; amphotericin B induced; transcriptionally activated by Mnl1p under weak acid stress, L	CACAAAAAGGATAATCACCAAGGCAGCAAAAATAAAAAGTCCTATCGTGGTACTTGTTAG	CAL0002044	orf19.1153	GAD1	orf19.8745|IPF11712.3|IPF7609.1|Contig4-2834_0001|CA1564|orf6.2779|orf6.3128|CaO19.1153|CAWG_00271	Ca21chr1_C_albicans_SC5314	Putative glutamate decarboxylase; alkaline, macrophage-downregulated gene; amphotericin B induced; transcriptionally activated by Mnl1p under weak acid stress; stationary phase enriched protein	CAL0002044	GO:0005516|GO:0005737|GO:0004351|GO:0006538|GO:0030170|GO:0034599	GO:0005516=calmodulin binding|GO:0004351=glutamate decarboxylase activity|GO:0030170=pyridoxal phosphate binding	GO:0005737=cytoplasm	GO:0006538=glutamate catabolic process|GO:0034599=cellular response to oxidative stress	GO:0004351|GO:0030170|GO:0005516|GO:0034599|GO:0006538|GO:0005737
CAL0002046	0.187453	Detected	-0.187453	Detected	0	-0.535984	Detected	-0.543792	Detected	-0.539888	0.102411	55301.7	41963.2	40363	32133.1	CAL0002046	CAL0002046	CAL0002046 (alignment of 60bp with 100.00% identity) , Description: Predicted ORF in Assemblies 19, 20 and 21; soluble protein in hyphae; biofilm induced; macrophage/pseudohyphal-induced; protein detected by mass spec in exponential and stationary phase	GCTGATGCCGGTGGTGAAGATATTCCAGACTTGGTTGACCAAAAATTTGACGATGTAGAA	CAL0002046	orf19.1154	EGD1	orf19.8746|IPF26175.1|IPF7610.1|Contig4-2834_0004|CA1565|orf6.3129|CaO19.8746|CaO19.1154|CAWG_00272	Ca21chr1_C_albicans_SC5314	Putative GAL4 DNA-binding enhancer protein; soluble protein in hyphae; biofilm induced; macrophage/pseudohyphal-induced; the same level of protein present in exponential and stationary growth phase yeast cultures	CAL0002046	GO:0042788|GO:0051083|GO:0051082|GO:0005854|GO:0005829	GO:0051082=unfolded protein binding	GO:0042788=polysomal ribosome|GO:0005854=nascent polypeptide-associated complex|GO:0005829=cytosol	GO:0051083='de novo' cotranslational protein folding	GO:0051082|GO:0051083|GO:0042788|GO:0005854|GO:0005829
CAL0002048	0.0135365	Detected	-0.0135365	Detected	0	0.200868	Detected	0.20275	Detected	0.201809	0.00449046	3470.45	3351.38	4762.11	3816.68	CAL0002048	CAL0002048	CAL0002048 (alignment of 60bp with 100.00% identity) , Description: Predicted ORF in Assemblies 19, 20 and 21; similar to S. cerevisiae pyrophosphate phosphatase Lpp1p; possible role in farnesol biosynthesis, Location: Complement (2553583..2552729) in C	GAGGAGTCACACAAACCTATAGATTCCGAAACCTTAACTGAACTGTTGTTACCACATTAG	CAL0002048	orf19.1155	DPP2	orf19.8747|IPF26170.1|IPF7611.1|Contig4-2834_0007|CA1566|orf6.3130|CaO19.8747|DPP1|CaO19.1155|CAWG_00273	Ca21chr1_C_albicans_SC5314	Protein similar to S. cerevisiae pyrophosphate phosphatase Lpp1p; possible role in farnesol biosynthesis	CAL0002048	GO:0016020|GO:0008195|GO:0006644	GO:0008195=phosphatidate phosphatase activity	GO:0016020=membrane	GO:0006644=phospholipid metabolic process	GO:0008195|GO:0006644|GO:0016020
CAL0002051	-0.0997195	Detected	0.0997195	Detected	0	0.847795	Detected	0.73542	Detected	0.791607	0.0202731	634.809	717.246	1475.35	1092.41	CAL0002051	CAL0002051	CAL0002051 (alignment of 60bp with 100.00% identity) , Description: Predicted ORF in Assemblies 19, 20 and 21, Location: 2550177..2551070 in Candida albicans Ca21chr1, Gene: orf19.1158 , :: Next best Hit, CAL0006403 (alignment of 14bp with 100.00% iden	CAATCACTTCAGTATTTTTCCATACAATACCTGAGAAATTTGTGGGTTTACTATGTGGTC	CAL0002051	orf19.1158	YFT2	orf19.8750|IPF26169.1|IPF7615.1|Contig4-2834_0010|CA1568|orf6.3133|IPF7615|CaO19.8750|CaO19.1158|CAWG_00275	Ca21chr1_C_albicans_SC5314	Hap43p-repressed gene	CAL0002051	GO:0008150|GO:0003674|GO:0005575	GO:0003674=molecular_function	GO:0005575=cellular_component	GO:0008150=biological_process	GO:0003674|GO:0008150|GO:0005575
CAL0002052	-0.235835	Detected	0.235835	Detected	0	1.08765	Detected	0.744114	Detected	0.915884	0.08825	2183.35	2979.18	6584.95	4153.91	CAL0002052	CAL0002052	CAL0002052 (alignment of 60bp with 100.00% identity) , Description: Predicted ORF in Assemblies 19, 20 and 21; similar to A. nidulans CYSA serine O-trans-acetylase, suggesting that C. albicans uses an O-acetyl-serine (OAS) pathway of sulfur assimilation;	GTTACGGACACGATACTTTCTTGTTAAGCTTGAATGATATCGGTAAACCAGTTAAGAAAT	CAL0002052	orf19.1159		orf19.8751|IPF26162.1|IPF7616.2|Contig4-2834_0012|CA1569|orf6.3134|CYS1|CaO19.8751|CaO19.1159|IPF7616|CAWG_00276	Ca21chr1_C_albicans_SC5314	Protein similar to A. nidulans CYSA serine O-trans-acetylase, suggesting that C. albicans uses an O-acetyl-serine (OAS) pathway of sulfur assimilation; induced upon biofilm formation	CAL0002052	GO:0005739|GO:0016413|GO:0019344	GO:0016413=O-acetyltransferase activity	GO:0005739=mitochondrion	GO:0019344=cysteine biosynthetic process	GO:0016413|GO:0019344|GO:0005739
CAL0002067	-0.0428519	Detected	0.0428519	Detected	0	0.406509	Detected	0.143219	Detected	0.274864	0.185506	1512.02	1578.86	2487.99	1659.25	CAL0002067	CAL0002067	CAL0002067 (alignment of 60bp with 100.00% identity) , Description: Predicted ORF in Assemblies 19, 20 and 21, Location: 2547774..2548421 in Candida albicans Ca21chr1, Gene: orf19.1160 , :: Next best Hit, CAL0001595 (alignment of 16bp with 100.00% iden	TACGCAATTAGTAGAAAGTTTGGCTACGAATTAGATCCCCATCATGGATCAATTGTGTAT	CAL0002067	orf19.1160	SVP26	orf19.8752|IPF26172.1|IPF7617.2|Contig4-2834_0013|CA1570|orf6.3135|CaO19.1160|CaO19.8752|IPF7617|CAWG_00277	Ca21chr1_C_albicans_SC5314	Ortholog(s) have COPII adaptor activity and role in ER to Golgi vesicle-mediated transport, fungal-type cell wall organization, protein glycosylation, protein retention in Golgi apparatus	CAL0002067	GO:0006888|GO:0030134|GO:0030173|GO:0031965|GO:0097020|GO:0031505|GO:0045053|GO:0030176|GO:0006486	GO:0097020=COPII adaptor activity	GO:0030134=ER to Golgi transport vesicle|GO:0030173=integral to Golgi membrane|GO:0031965=nuclear membrane|GO:0030176=integral to endoplasmic reticulum membrane	GO:0006888=ER to Golgi vesicle-mediated transport|GO:0031505=fungal-type cell wall organization|GO:0045053=protein retention in Golgi apparatus|GO:0006486=protein glycosylation	GO:0097020|GO:0006486|GO:0045053|GO:0031505|GO:0006888|GO:0030134|GO:0031965|GO:0030173|GO:0030176
CAF0006922	-0.0695019	Detected	0.0695014	Detected	-2.38419e-07	0.890432	Detected	0.63848	Detected	0.764456	0.0336448	58.6585	63.5569	137.506	92.4263	CAF0006922	CAF0006922	CAF0006922(alignment 60bp with 100.00% identity) , Description: ORF Predicted by Annotation Working Group, Location: 2540598..2541211 in Candida albicans Ca21chr1, Gene: orf19.1162.1 , :: Next best hit , location within target gene 390-449 , CAL0002629(	AAACACACATATCATTGAAGCATCAGAAGATGACGGCGAGGAAAGCACAGACCAGAACTC	CAF0006922	orf19.1162.1	YJR112W-A	IPF26174.1|IPF13080.1|Contig4-2109_0002|CA0589|IPF13080|CAWG_00280	Ca21chr1_C_albicans_SC5314	Ortholog(s) have Golgi apparatus localization	CAF0006922	GO:0008150|GO:0003674|GO:0005794	GO:0003674=molecular_function	GO:0005794=Golgi apparatus	GO:0008150=biological_process	GO:0003674|GO:0003674|GO:0008150|GO:0008150|GO:0005794|GO:0005794
CAL0002071	0.058054	Detected	-0.058054	Detected	0	0.509596	Detected	0.253571	Detected	0.381583	0.113126	541.506	491.63	892.383	598.136	CAL0002071	CAL0002071	CAL0002071 (alignment of 60bp with 100.00% identity) , Description: Predicted ORF in Assemblies 19, 20 and 21, Location: Complement (2540436..2539345) in Candida albicans Ca21chr1, Gene: orf19.1163 , :: Next best Hit, CAL0003564 (alignment of 14bp with	AAGCCTGCAGGAATGAATGAAATCCAAAGCAATATCCTTGATAGTTGCAATTTGCTTTGA	CAL0002071	orf19.1163	YDR336W	orf19.8756|IPF13079.1|IPF7620.2|Contig4-2109_0003|CA0590|orf6.1612|orf6.3446|CaO19.8756|IPF13079|CaO19.1163|CAWG_00281	Ca21chr1_C_albicans_SC5314	Has domain(s) with predicted GTP binding activity and intracellular localization	CAL0002071	GO:0005622|GO:0008150|GO:0005525	GO:0005525=GTP binding	GO:0005622=intracellular	GO:0008150=biological_process	GO:0005525|GO:0008150|GO:0005622
CAL0002072	0.21142	Detected	-0.21142	Detected	0	-1.3818	Detected	-0.650673	Detected	-1.01623	0.137855	22297.6	16366.6	8905.8	11832.7	CAL0002072	CAL0002072	CAL0002072 (alignment of 60bp with 100.00% identity) , Description: Predicted ORF in Assemblies 19, 20 and 21; mutation confers hypersensitivity to tubercidin (7-deazaadenosine); macrophage/pseudohyphal-induced, Location: 2538599..2539159 in Candida alb	AGATTTTTGCCAAAACCACCAAGCGTGGGTCCAAAACCTAAGAGAAAAACCGGTGGAAAG	CAL0002072	orf19.1164	GAR1	orf19.8757|IPF13076.1|IPF7621.1|Contig4-2109_0005|Contig4-2394_0002|CA1789|orf6.1613|orf6.3445|CaO19.1164|CAWG_00282	Ca21chr1_C_albicans_SC5314	Putative H/ACA snoRNP pseudouridylase complex protein; mutation confers hypersensitivity to tubercidin (7-deazaadenosine); macrophage/pseudohyphal-induced	CAL0002072	GO:0009982|GO:0031429|GO:0031120|GO:0031118|GO:0035690|GO:0034513	GO:0009982=pseudouridine synthase activity|GO:0034513=box H/ACA snoRNA binding	GO:0031429=box H/ACA snoRNP complex	GO:0031120=snRNA pseudouridine synthesis|GO:0031118=rRNA pseudouridine synthesis|GO:0035690=cellular response to drug	GO:0009982|GO:0034513|GO:0035690|GO:0031120|GO:0031118|GO:0031429
CAL0002073	-0.06601	Detected	0.06601	Detected	0	0.139262	Detected	0.0479484	Detected	0.093605	0.36377	14465.2	15597.5	20097.3	15099.8	CAL0002073	CAL0002073	CAL0002073 (alignment of 60bp with 100.00% identity) , Description: Protein similar to S. cerevisiae Ede1p, which is involved in endocytosis; activates transcription in 1-hybrid assay in S. cerevisiae, Location: Complement (2538201..2534209) in Candida	TTGAAGAAAGAAGACTGGAACTTGGAAGCTGCTACAAACTATTTATTGGACACTGCTTAA	CAL0002073	orf19.1166	CTA3	orf19.8759|IPF26181.1|IPF7623.2|Contig4-2394_0005|Contig4-2394_0006|CA1788|orf6.3443|EDE1|USO1.3|CAWG_00283	Ca21chr1_C_albicans_SC5314	Protein similar to S. cerevisiae Ede1p, which is involved in endocytosis; activates transcription in 1-hybrid assay in S. cerevisiae	CAL0002073	GO:0043332|GO:0043130|GO:0005509|GO:0030479|GO:0005934|GO:0045893|GO:0005935|GO:0030968|GO:0006897	GO:0043130=ubiquitin binding|GO:0005509=calcium ion binding	GO:0043332=mating projection tip|GO:0030479=actin cortical patch|GO:0005934=cellular bud tip|GO:0005935=cellular bud neck	GO:0045893=positive regulation of transcription, DNA-dependent|GO:0030968=endoplasmic reticulum unfolded protein response|GO:0006897=endocytosis	GO:0005509|GO:0043130|GO:0045893|GO:0006897|GO:0030968|GO:0030479|GO:0043332|GO:0005934|GO:0005935
CAL0002074	-0.0553737	Detected	0.0553741	Detected	2.38419e-07	0.61034	Detected	0.536938	Detected	0.573639	0.0131477	239.531	254.5	457.912	348.342	CAL0002074	CAL0002074	CAL0002074 (alignment of 60bp with 100.00% identity) , Description: Predicted ORF in Assemblies 19, 20 and 21, Location: Complement (2533618..2532458) in Candida albicans Ca21chr1, Gene: orf19.1167 , :: Next best Hit, CAL0003384 (alignment of 16bp with	AAAGAAGATTACACTCCTGGAGATTTAGCTGATGCCTTGAGTGCAATCAAACCTATTTAG	CAL0002074	orf19.1167	JLP1	orf19.8760|IPF26164.1|IPF19929.1|Contig4-2394_0007|Contig4-2602_0012|CA1787|orf6.3442|TCD1|CaO19.8760|CaO19.1167|IFH3|CAWG_00284	Ca21chr1_C_albicans_SC5314	Ortholog(s) have sulfonate dioxygenase activity and role in sulfur compound catabolic process	CAL0002074	GO:0044273|GO:0000907|GO:0005575|GO:0055114	GO:0000907=sulfonate dioxygenase activity	GO:0005575=cellular_component	GO:0044273=sulfur compound catabolic process|GO:0055114=oxidation-reduction process	GO:0000907|GO:0055114|GO:0044273|GO:0005575
CAL0002075	-0.0568995	Detected	0.0568995	Detected	0	-0.247548	Detected	-0.0408473	Detected	-0.144197	0.346112	9118.77	9709.13	9628.66	8894.24	CAL0002075	CAL0002075	CAL0002075 (alignment of 60bp with 100.00% identity) , Description: Predicted zinc-finger protein of unknown function, Location: Complement (2531948..2531361) in Candida albicans Ca21chr1, Gene: orf19.1168 , :: Next best Hit, CAL0001532 (alignment of 1	CCAATCTATAGTCCAAACTACAAACTTCAAACTAAAGACAGTAATGTGAGGTCAGTATAG	CAL0002075	orf19.1168	ZCF3	orf19.8761|IPF7629.2|Contig4-2602_0009|CA1786|orf6.3441|CaO19.1168|CaO19.8761|IPF7629|CAWG_00285	Ca21chr1_C_albicans_SC5314	Predicted zinc-finger protein; required for wild-type filamentous growth and resistance to rapamycin and flucytosine; possibly an essential gene, disruptants not obtained by UAU1 method; Hap43p-repressed gene; biofilm-induced	CAL0002075	GO:0006355|GO:0070784|GO:0030447|GO:0003700|GO:0005634|GO:0008270|GO:0070783|GO:0035690	GO:0003700=sequence-specific DNA binding transcription factor activity|GO:0008270=zinc ion binding	GO:0005634=nucleus	GO:0006355=regulation of transcription, DNA-dependent|GO:0070784=regulation of growth of unicellular organism as a thread of attached cells|GO:0030447=filamentous growth|GO:0070783=growth of unicellular organism as a thread of attached cells|GO:0035690=cellular response to drug	GO:0008270|GO:0003700|GO:0030447|GO:0035690|GO:0006355|GO:0070783|GO:0070784|GO:0005634
CAL0002076	-0.119637	Detected	0.119637	Detected	0	0.865928	Detected	0.61856	Detected	0.742244	0.0497691	3318.78	3854.74	7919.24	5339.96	CAL0002076	CAL0002076	CAL0002076 (alignment of 60bp with 100.00% identity) , Description: Predicted ORF in Assemblies 19, 20 and 21, Location: Complement (2530577..2529627) in Candida albicans Ca21chr1, Gene: orf19.1169 , :: Next best Hit, CAL0006047 (alignment of 14bp with	TTTGCCAGGAAAAGAGTCGATATATGGGATAGAGAAGAGGGCAATAACGAGAAGCATTGA	CAL0002076	orf19.1169	JID1	orf19.8762|IPF26167.1|IPF7631.2|Contig4-2602_0008|CA1785|orf6.3440|JID1|CaO19.1169|CaO19.8762|IPF7631|CAWG_00286	Ca21chr1_C_albicans_SC5314	Ortholog(s) have mitochondrion localization	CAL0002076	GO:0005739|GO:0008150|GO:0031072	GO:0031072=heat shock protein binding	GO:0005739=mitochondrion	GO:0008150=biological_process	GO:0031072|GO:0008150|GO:0005739
CAL0002999	0.00269699	Detected	-0.00269699	Detected	0	0.349027	Detected	0.35585	Detected	0.352438	0.000152236	346.153	339.338	530.328	426.5	CAL0002999	CAL0002999	CAL0002999 (alignment of 60bp with 100.00% identity) , Description: Predicted ORF in Assemblies 19, 20 and 21, Location: 214611..216203 in Candida albicans Ca21chr6, Gene: orf19.117 , :: Next best Hit, CAL0005155 (alignment of 20bp with 100.00% identit	CGTGAAAATAATCGTCAAGAAATGTTTGCTAGTGAACAACGTATAAAACAAGGAATCACC	CAL0002999	orf19.117	SEC9	orf19.7764|IPF19868.1|IPF14761.2|orf6.1185|orf6.1444|Contig4-3075_0021|CA0483|CaO19.117|SEC9|CAWG_05251	Ca21chr6_C_albicans_SC5314	Ortholog(s) have SNAP receptor activity, role in vesicle fusion and SNARE complex, extrinsic to plasma membrane localization	CAL0002999	GO:0005484|GO:0031201|GO:0006906|GO:0019897	GO:0005484=SNAP receptor activity	GO:0031201=SNARE complex|GO:0019897=extrinsic to plasma membrane	GO:0006906=vesicle fusion	GO:0005484|GO:0006906|GO:0031201|GO:0019897
CAL0002091	0.0254607	Detected	-0.0254607	Detected	0	0.0792613	Detected	0.106209	Detected	0.0927353	0.084447	1494.92	1419.96	1869.97	1524.99	CAL0002091	CAL0002091	CAL0002091 (alignment of 60bp with 100.00% identity) , Description: Putative chorismate mutase; fungal-specific (no human or murine homolog); alkaline upregulated, Location: Complement (2529344..2528538) in Candida albicans Ca21chr1, Gene: orf19.1170 ,	GGGTAGATCCATCCTTAAAATTTGGACAAAACGTACAAAGCAAAGTTAAGCCAGAAGTAA	CAL0002091	orf19.1170	ARO7	orf19.8763|IPF26168.1|IPF7632.1|Contig4-2602_0006|CA1784|orf6.3439|CaO19.1170|CaO19.8763|CAWG_00287	Ca21chr1_C_albicans_SC5314	Putative chorismate mutase; fungal-specific (no human or murine homolog); alkaline upregulated	CAL0002091	GO:0009073|GO:0005634|GO:0004106|GO:0005829	GO:0004106=chorismate mutase activity	GO:0005634=nucleus|GO:0005829=cytosol	GO:0009073=aromatic amino acid family biosynthetic process	GO:0004106|GO:0009073|GO:0005634|GO:0005829
CAL0002093	-0.135785	Detected	0.135785	Detected	0	0.211758	Detected	0.682264	Detected	0.447011	0.241571	49.8498	59.2108	76.4372	84.7737	CAL0002093	CAL0002093	CAL0002093 (alignment of 60bp with 100.00% identity) , Description: Predicted ORF in Assemblies 19, 20 and 21, Location: Complement (2527061..2524803) in Candida albicans Ca21chr1, Gene: orf19.1171 , :: Next best Hit, CAL0000345 (alignment of 14bp with	CTGGTTCAAGTATAGACAGAGTTAATATGTATGCCAATTGTACAGTTTTAACTCTCGTAG	CAL0002093	orf19.1171		orf19.8764|IPF26156.1|IPF7635.2|Contig4-2602_0002|CA1783|orf6.3438|CaO19.8764|CaO19.1171|IPF7635|CAWG_00288	Ca21chr1_C_albicans_SC5314	Ortholog of C. parapsilosis CDC317 : CPAR2_208080, Candida tenuis NRRL Y-1498 : CANTEDRAFT_120956, Debaryomyces hansenii CBS767 : DEHA2F24508g and Candida dubliniensis CD36 : CD36_10780	CAL0002093	GO:0008150|GO:0003674|GO:0005575	GO:0003674=molecular_function	GO:0005575=cellular_component	GO:0008150=biological_process	GO:0003674|GO:0008150|GO:0005575
CAL0002099	0.117042	Detected	-0.117042	Detected	0	-0.0342259	Detected	-0.25164	Detected	-0.142933	0.465319	6464.44	5408.19	7014.8	4829.34	CAL0002099	CAL0002099	CAL0002099 (alignment of 60bp with 100.00% identity) , Description: Predicted ORF in Assemblies 19, 20 and 21, Location: 21616..22896 in Candida albicans Ca21chr6, Gene: orf19.1177 , :: Next best Hit, CAL0004815 (alignment of 14bp with 100.00% identity	TATAATAGTGATTTGAACGAGCCGCTAGCTGCACACGAAGAGGATGGGGTGTTTGAAAGA	CAL0002099	orf19.1177	RTT106	orf19.8769|IPF26139.1|IPF15134.2|Contig4-2980_0004|CA0192|orf6.1744|orf6.817|RTT106|CaO19.1177|IPF15134|CAWG_05338	Ca21chr6_C_albicans_SC5314	Ortholog of S. cerevisiae RTT106; Hap43p-repressed gene	CAL0002099	GO:0042393|GO:0006368|GO:0003690|GO:0070869|GO:0006335|GO:0005634|GO:0006336|GO:0000122	GO:0042393=histone binding|GO:0003690=double-stranded DNA binding	GO:0005634=nucleus	GO:0006368=transcription elongation from RNA polymerase II promoter|GO:0070869=heterochromatin assembly involved in chromatin silencing|GO:0006335=DNA replication-dependent nucleosome assembly|GO:0006336=DNA replication-independent nucleosome assembly|GO:0000122=negative regulation of transcription from RNA polymerase II promoter	GO:0042393|GO:0003690|GO:0006335|GO:0000122|GO:0006368|GO:0006336|GO:0070869|GO:0005634
CAL0002100	-0.0355721	Detected	0.0355725	Detected	2.38419e-07	0.673143	Detected	0.00260878	Detected	0.337876	0.421821	239.327	247.398	471.365	237.043	CAL0002100	CAL0002100	CAL0002100 (alignment of 60bp with 100.00% identity) , Description: Putative transcription factor with bZIP DNA-binding motif, Location: Complement (21525..20920) in Candida albicans Ca21chr6, Gene: orf19.1178 , :: Next best Hit, CAL0005150 (alignment o	TTCCCGTGTGTAGTCACATACTAGCTGTATTAATAATAAAATACAACTCACACATGTTCG	CAL0002100	orf19.1178		orf19.8768|IPF18909.2|IPF15133.2|Contig4-2980_0001|CA6185|orf6.1743|orf6.818|CaO19.1178|IPF15133|CAWG_05339	Ca21chr6_C_albicans_SC5314	Putative transcription factor with bZIP DNA-binding motif; Hap43p-repressed gene	CAL0002100	GO:0006355|GO:0003700|GO:0005575	GO:0003700=sequence-specific DNA binding transcription factor activity	GO:0005575=cellular_component	GO:0006355=regulation of transcription, DNA-dependent	GO:0003700|GO:0006355|GO:0005575
CAL0002101	-0.0153012	Detected	0.0153012	Detected	0	-0.220639	Detected	-0.453519	Detected	-0.337079	0.102978	18399.8	18493.2	19231.9	13099	CAL0002101	CAL0002101	CAL0002101 (alignment of 60bp with 100.00% identity) , Description: Transcriptionally regulated by iron; expression greater in high iron; possibly subject to Kex2p processing, Location: Complement (23241..22909) in Candida albicans Ca21chr6, Gene: orf19	CAACATCCATATAAAAGAGGTGCATTCACCCAGCTTCTTGATAAATTTGGTGCTAAATAT	CAL0002101	orf19.1179		orf6.819|IPF19608.1|IPF19609.1|CA0674|orf6.1745|CaO19.1179|IPF19608|CAWG_05337	Ca21chr6_C_albicans_SC5314	Transcriptionally regulated by iron; expression greater in high iron; possibly subject to Kex2p processing; Hap43p-repressed gene	CAL0002101	GO:0008150|GO:0003674|GO:0005575	GO:0003674=molecular_function	GO:0005575=cellular_component	GO:0008150=biological_process	GO:0003674|GO:0008150|GO:0005575
CAL0003001	0.21214	Detected	-0.21214	Detected	0	0.0109563	Detected	-0.363594	Detected	-0.176319	0.596809	6224.66	4564.38	6524.91	4028.5	CAL0003001	CAL0003001	CAL0003001 (alignment of 60bp with 100.00% identity) , Description: Delta-12 fatty acid desaturase, involved in production of linoleic acid, which is a major component of membranes, Location: 218253..219563 in Candida albicans Ca21chr6, Gene: orf19.118	TGGGGTTTTGATGTATAGAAATACTAATGGATTTGGAGTCGATCCTAAAAAGCAAACCCA	CAL0003001	orf19.118	FAD2	orf19.7765|IPF14763.2|IPF29951.1|orf6.1443|Contig4-2244_0003|CA0482|IPF14763|CaO19.118|CaO19.7765|ODE1|CAWG_05250	Ca21chr6_C_albicans_SC5314	Delta-12 fatty acid desaturase, involved in production of linoleic acid, which is a major component of membranes	CAL0003001	GO:0006636|GO:0016720|GO:0009405|GO:0005575|GO:0055114	GO:0016720=delta12-fatty acid dehydrogenase activity	GO:0005575=cellular_component	GO:0006636=unsaturated fatty acid biosynthetic process|GO:0009405=pathogenesis|GO:0055114=oxidation-reduction process	GO:0016720|GO:0009405|GO:0006636|GO:0055114|GO:0005575
CAL0002124	-0.0909157	Detected	0.0909157	Detected	0	0.826301	Detected	0.0292492	Detected	0.427775	0.405161	2851.75	3182.99	6489.96	2989.69	CAL0002124	CAL0002124	CAL0002124 (alignment of 60bp with 100.00% identity) , Description: Predicted ORF in Assemblies 19, 20 and 21, Location: 23430..24677 in Candida albicans Ca21chr6, Gene: orf19.1180 , :: Next best Hit, CAL0004969 (alignment of 16bp with 100.00% identity	TATTTGACAACCGAAGAAATCCAACAAGGAATCAAGATTTGGGGAGAACTTTTAGAATAG	CAL0002124	orf19.1180	YER152C	orf19.8771|IPF13098.2|IPF19848.2|Contig4-2980_0007|CA0675|orf6.1746|orf6.820|CaO19.1180|IPF13098|CAWG_05336	Ca21chr6_C_albicans_SC5314	Ortholog(s) have 2-aminoadipate transaminase activity and cytoplasm, nucleus localization	CAL0002124	GO:0005737|GO:0009058|GO:0047536|GO:0030170|GO:0005634	GO:0047536=2-aminoadipate transaminase activity|GO:0030170=pyridoxal phosphate binding	GO:0005737=cytoplasm|GO:0005634=nucleus	GO:0009058=biosynthetic process	GO:0030170|GO:0047536|GO:0009058|GO:0005634|GO:0005737
CAL0002126	0.0438604	Detected	-0.0438604	Detected	0	-0.72771	Detected	-0.489263	Detected	-0.608487	0.0409288	148.265	137.284	104.663	98.8312	CAL0002126	CAL0002126	CAL0002126 (alignment of 60bp with 100.00% identity) , Description: Predicted ORF in Assemblies 19, 20 and 21, Location: 24885..25973 in Candida albicans Ca21chr6, Gene: orf19.1181 , :: Next best Hit, CAL0001537 (alignment of 15bp with 100.00% identity	CCAACCTGCAAGAATAACGTCAATGGCAGATAATATCGAAGTAGTGAACAAATTACTATA	CAL0002126	orf19.1181		orf19.8772|IPF13097.2|IPF29548.1|Contig4-2980_0009|CA0676|orf6.1747|CaO19.1181|CaO19.8772|IPF13097|CAWG_05335	Ca21chr6_C_albicans_SC5314	Has domain(s) with predicted catalytic activity and membrane localization	CAL0002126	GO:0008150|GO:0016020|GO:0003824	GO:0003824=catalytic activity	GO:0016020=membrane	GO:0008150=biological_process	GO:0003824|GO:0008150|GO:0016020
CAL0002128	-0.00161839	Detected	0.00161839	Detected	0	-0.0556812	Detected	0.118616	Detected	0.0314674	0.752656	5699.97	5621.26	6616.34	5975.95	CAL0002128	CAL0002128	CAL0002128 (alignment of 60bp with 100.00% identity) , Description: Predicted ORF in Assemblies 19, 20 and 21, Location: Complement (26861..25968) in Candida albicans Ca21chr6, Gene: orf19.1182 , :: Next best Hit, CAL0000721 (alignment of 14bp with 100	GTCGACTACACGTCCAGCAAAATCAAGCAAGCAAGACGCAGAGCTAAGAAGATATTATAG	CAL0002128	orf19.1182	VAM7	orf19.8773|IPF13095.1|IPF13903.2|Contig4-2980_0011|CA0677|orf6.1748|orf6.4619|CaO19.1182|VAM7|IPF13095|CAWG_05334	Ca21chr6_C_albicans_SC5314	Ortholog(s) have SNAP receptor activity, phosphatidylinositol-3-phosphate binding activity and role in piecemeal microautophagy of nucleus, vacuole fusion, non-autophagic, vesicle fusion	CAL0002128	GO:0005484|GO:0007154|GO:0031201|GO:0000329|GO:0034727|GO:0032266|GO:0042144|GO:0006906	GO:0005484=SNAP receptor activity|GO:0032266=phosphatidylinositol-3-phosphate binding	GO:0031201=SNARE complex|GO:0000329=fungal-type vacuole membrane	GO:0007154=cell communication|GO:0034727=piecemeal microautophagy of nucleus|GO:0042144=vacuole fusion, non-autophagic|GO:0006906=vesicle fusion	GO:0005484|GO:0032266|GO:0007154|GO:0006906|GO:0042144|GO:0034727|GO:0000329|GO:0031201
CAL0002129	-0.0751028	Detected	0.0751028	Detected	0	0.249639	Detected	0.302217	Detected	0.275928	0.0740431	4599.62	5022.57	6942.25	5762.98	CAL0002129	CAL0002129	CAL0002129 (alignment of 60bp with 100.00% identity) , Description: Predicted ORF in Assemblies 19, 20 and 21, Location: 27005..28651 in Candida albicans Ca21chr6, Gene: orf19.1183 , :: Next best Hit, CAL0001834 (alignment of 13bp with 100.00% identity	GAAAATAGTGATCACTTTATCTGGAATAGTCCAAAAGGTAGAAAGGAGTTACAACAGTTG	CAL0002129	orf19.1183	YNL115C	orf19.8774|IPF13094.1|IPF13902.1|Contig4-2980_0013|CA0678|orf6.1749|orf6.4620|CaO19.1183|IPF13094|CAWG_05333	Ca21chr6_C_albicans_SC5314	Ortholog(s) have fungal-type vacuole localization	CAL0002129	GO:0008150|GO:0003674|GO:0000324	GO:0003674=molecular_function	GO:0000324=fungal-type vacuole	GO:0008150=biological_process	GO:0003674|GO:0008150|GO:0000324
CAL0002130	-0.0325775	Detected	0.0325775	Detected	0	-0.330546	Detected	-0.239973	Detected	-0.28526	0.0361827	13565.1	13964.5	13296.8	11332.7	CAL0002130	CAL0002130	CAL0002130 (alignment of 60bp with 100.00% identity) , Description: Predicted ORF in Assemblies 19, 20 and 21, Location: 28821..29930 in Candida albicans Ca21chr6, Gene: orf19.1185 , :: Next best Hit, CAL0001170 (alignment of 17bp with 100.00% identity	CTGTTCTCATGTCCCAATTGTCGATATGTTTGTGATTTGGAATATTTTTCAGAGTCAGAA	CAL0002130	orf19.1185	DMA2	orf19.8776|IPF13090.3|IPF13899.2|Contig4-2980_0017|Contig4-2980_0018|CA2646|orf6.1751|orf6.4622|orf6.515|IPF13089|CaO19.1185|CAWG_05332	Ca21chr6_C_albicans_SC5314	Ortholog(s) have ubiquitin-protein ligase activity and role in establishment of mitotic spindle orientation, mitotic cell cycle spindle assembly checkpoint, protein autoubiquitination, septin ring assembly	CAL0002130	GO:0007094|GO:0004842|GO:0000921|GO:0005816|GO:0000132|GO:0008270|GO:0032153|GO:0005829|GO:0051865	GO:0004842=ubiquitin-protein ligase activity|GO:0008270=zinc ion binding	GO:0005816=spindle pole body|GO:0032153=cell division site|GO:0005829=cytosol	GO:0007094=mitotic cell cycle spindle assembly checkpoint|GO:0000921=septin ring assembly|GO:0000132=establishment of mitotic spindle orientation|GO:0051865=protein autoubiquitination	GO:0008270|GO:0004842|GO:0000132|GO:0051865|GO:0007094|GO:0000921|GO:0005816|GO:0005829|GO:0032153
CAL0002131	0.119562	Detected	-0.119562	Detected	0	-0.459605	Detected	-0.388639	Detected	-0.424122	0.0766588	4619.56	3851.28	3726.27	3132.98	CAL0002131	CAL0002131	CAL0002131 (alignment of 60bp with 100.00% identity) , Description: Predicted ORF in Assemblies 19, 20 and 21; possibly spurious ORF (Annotation Working Group prediction), Location: 30104..30796 in Candida albicans Ca21chr6, Gene: orf19.1186 , :: Next b	CCAATTCTTGGGCCCATTGGGATATCAATATTGAATGGCTTGGCAAACTTTGCAAAATAA	CAL0002131	orf19.1186		orf19.8777|IPF13897.2|IPF13088.1|Contig4-2980_0021|CA2647|orf6.4623|orf6.516|CaO19.1186|IPF13088|CAWG_05331	Ca21chr6_C_albicans_SC5314	Ortholog of Candida dubliniensis CD36 : CD36_60220, Candida tropicalis MYA-3404 : CTRG_03015 and Candida albicans WO-1 : CAWG_05331	CAL0002131	GO:0008150|GO:0003674|GO:0005575	GO:0003674=molecular_function	GO:0005575=cellular_component	GO:0008150=biological_process	GO:0003674|GO:0008150|GO:0005575
CAL0002132	-0.0410604	Detected	0.0410604	Detected	0	-0.554372	Detected	-0.417284	Detected	-0.485828	0.0259983	22799.8	23748.7	19249.9	16944	CAL0002132	CAL0002132	CAL0002132 (alignment of 60bp with 100.00% identity) , Description: Transcriptional activator of hyphal growth; Myc bHLH family: directly regulates Tec1p, which regulates hypha-specific orfs; probably homodimeric, phosphorylated; enhances S. cerevisiae n	GGCTTGAGAACCCTGATTTAACTCAATATATGGATGAGGATATCAAACTTGAATTGAAGA	CAL0002132	orf19.1187	CPH2	orf19.8778|IPF13893.3|IPF9062.2|Contig4-2980_0027|CA2648|orf6.4624|orf6.517|CaO19.1187|IPF9062|CAWG_05330	Ca21chr6_C_albicans_SC5314	Myc-bHLH family transcriptional activator of hyphal growth; directly regulates Tec1p, which regulates hypha-specific genes; probably homodimeric, phosphorylated; required for wild-type levels of Candida colonization of the mouse GI tract	CAL0002132	GO:0071280|GO:0006355|GO:0036244|GO:0003700|GO:0030447|GO:0006357|GO:1900445|GO:1900442|GO:0005634|GO:1900430|GO:0070887|GO:0036180|GO:0035690|GO:0034605|GO:1900461|GO:0003690|GO:0036171|GO:0007124|GO:2000220|GO:0045944|GO:0044182|GO:1900439|GO:0036178|GO:0044403	GO:0003700=sequence-specific DNA binding transcription factor activity|GO:0003690=double-stranded DNA binding	GO:0005634=nucleus	GO:0071280=cellular response to copper ion|GO:0006355=regulation of transcription, DNA-dependent|GO:0036244=cellular response to neutral pH|GO:0030447=filamentous growth|GO:0006357=regulation of transcription from RNA polymerase II promoter|GO:1900445=positive regulation of filamentous growth of a population of unicellular organisms in response to biotic stimulus|GO:1900442=positive regulation of…	GO:0003690|GO:0003700|GO:0003700|GO:0045944|GO:0030447|GO:0036171|GO:1900439|GO:1900461|GO:2000220|GO:0044182|GO:0006355|GO:0006355|GO:0071280|GO:0044403|GO:0034605|GO:0035690|GO:0007124|GO:0036178|GO:1900442|GO:0036180|GO:1900445|GO:1900430|GO:0044182|GO:0070887|GO:0036244|GO:0006357|GO:0005634
CAL0002133	-0.0847878	Detected	0.0847878	Detected	0	-0.418519	Detected	-0.424943	Detected	-0.421731	0.0381752	49147.9	54392.6	46996.2	37449.7	CAL0002133	CAL0002133	CAL0002133 (alignment of 60bp with 100.00% identity) , Description: Predicted ORF in Assemblies 19, 20 and 21; transcription regulated upon yeast-hyphal switch; transcriptionally activated by Mnl1p under weak acid stress, Location: 39779..41833 in Candi	GATGAAGTCCAAAGAATGTTGACGGCGAACAAACGGATTAATTTAGATGATAACAGTTAG	CAL0002133	orf19.1189		orf19.8780|IPF19121.2|IPF9057.2|Contig4-2980_0031|CA2649|orf6.4626|orf6.861|CaO19.1189|IPF9057|CAWG_05329	Ca21chr6_C_albicans_SC5314	Late-stage biofilm-induced gene; transcription regulated upon yeast-hyphal switch; transcriptionally activated by Mnl1p under weak acid stress; contains a 5' UTR intron	CAL0002133	GO:0008150|GO:0003674|GO:0005575	GO:0003674=molecular_function	GO:0005575=cellular_component	GO:0008150=biological_process	GO:0003674|GO:0008150|GO:0005575
CAL0003003	0.272314	Detected	-0.272314	Detected	0	-0.637799	Detected	-0.659505	Detected	-0.648652	0.140308	125.262	84.5004	80.3286	63.3368	CAL0003003	CAL0003003	CAL0003003 (alignment of 60bp with 100.00% identity) , Description: Predicted ORF in Assemblies 19, 20 and 21, Location: Complement (220608..219811) in Candida albicans Ca21chr6, Gene: orf19.119 , :: Next best Hit, CAL0003918 (alignment of 19bp with 94	CGATATGGATGGTCATAAATTAATAACTACGGGAATATATCTGATTTTCCGTCATCCATC	CAL0003003	orf19.119	STE14	orf19.7766|IPF14764.1|IPF29956.1|orf6.1442|Contig4-2244_0002|CA0481|STE14.3f|STE14|CAWG_05249	Ca21chr6_C_albicans_SC5314	Ortholog(s) have protein C-terminal S-isoprenylcysteine carboxyl O-methyltransferase activity	CAL0003003	GO:0004671|GO:0006481|GO:0005789|GO:0005637|GO:0016021|GO:0034613|GO:0071432	GO:0004671=protein C-terminal S-isoprenylcysteine carboxyl O-methyltransferase activity	GO:0005789=endoplasmic reticulum membrane|GO:0005637=nuclear inner membrane|GO:0016021=integral to membrane	GO:0006481=C-terminal protein methylation|GO:0034613=cellular protein localization|GO:0071432=peptide mating pheromone maturation involved in conjugation with cellular fusion	GO:0004671|GO:0071432|GO:0006481|GO:0034613|GO:0016021|GO:0005637|GO:0005789
CAL0002155	-0.155269	Detected	0.155269	Detected	0	0.649272	Detected	0.334306	Detected	0.491789	0.156185	9668.32	11798.3	20349.9	13093.9	CAL0002155	CAL0002155	CAL0002155 (alignment of 60bp with 100.00% identity) , Description: Predicted ORF in Assemblies 19, 20 and 21, Location: Complement (46683..43852) in Candida albicans Ca21chr6, Gene: orf19.1190 , :: Next best Hit, CAL0003876 (alignment of 14bp with 100	GAAATTCTTCCAAGGTGAAGGGTATGCCTACGAACCATTTACATTTAAATCTATAGACAT	CAL0002155	orf19.1190		orf19.8781|IPF9052.3|IPF13604.2|Contig4-3055_0026|CA2650|orf6.4627|orf6.860|CaO19.1190|VPH1|STV1|CAWG_05328	Ca21chr6_C_albicans_SC5314	Has domain(s) with predicted hydrogen ion transmembrane transporter activity, role in ATP hydrolysis coupled proton transport and proton-transporting two-sector ATPase complex, proton-transporting domain localization	CAL0002155	GO:0033177|GO:0015078|GO:0015991	GO:0015078=hydrogen ion transmembrane transporter activity	GO:0033177=proton-transporting two-sector ATPase complex, proton-transporting domain	GO:0015991=ATP hydrolysis coupled proton transport	GO:0015078|GO:0015991|GO:0033177
CAL0002157	-0.0724292	Detected	0.0724292	Detected	0	0.233935	Detected	0.262155	Detected	0.248045	0.078253	3388.72	3686.63	5049.87	4121.88	CAL0002157	CAL0002157	CAL0002157 (alignment of 60bp with 100.00% identity) , Description: Predicted ORF in Assemblies 19, 20 and 21, Location: 47177..49597 in Candida albicans Ca21chr6, Gene: orf19.1191 , :: Next best Hit, CAL0001272 (alignment of 16bp with 100.00% identity	GGCTGGAATGGCAATCAATTCCATTTCAGAAGAGGTAATTTTGAATTTCATTTCTTTGCT	CAL0002157	orf19.1191	HRD3	orf19.8782|IPF26127.1|IPF13605.2|Contig4-3055_0024|CA2651|orf6.4628|CaO19.1191|HRD3|CaO19.8782|CAWG_05327	Ca21chr6_C_albicans_SC5314	Ortholog(s) have ubiquitin-protein ligase activity, role in ER-associated protein catabolic process and Hrd1p ubiquitin ligase ERAD-L complex, Hrd1p ubiquitin ligase ERAD-M complex, luminal surveillance complex localization	CAL0002157	GO:0004842|GO:0000838|GO:0000839|GO:0034099|GO:0030433	GO:0004842=ubiquitin-protein ligase activity	GO:0000838=Hrd1p ubiquitin ligase ERAD-M complex|GO:0000839=Hrd1p ubiquitin ligase ERAD-L complex|GO:0034099=luminal surveillance complex	GO:0030433=ER-associated protein catabolic process	GO:0004842|GO:0030433|GO:0000838|GO:0034099|GO:0000839
CAL0002159	0.0191822	Detected	-0.0191822	Detected	0	-0.322322	Detected	-0.244779	Detected	-0.28355	0.0224912	1426.33	1366.66	1356.56	1145.78	CAL0002159	CAL0002159	CAL0002159 (alignment of 60bp with 100.00% identity) , Description: Protein similar to S. cerevisiae Dna2p, which is a DNA replication factor involved in DNA repair; induced under hydroxyurea treatment, Location: Complement (53930..49650) in Candida alb	CCAACTAGATCACAAAAAAGCCAAGATTCGCCAATATTGAATAGAAACCCTATACTTAAG	CAL0002159	orf19.1192	DNA2	orf19.8783|IPF26141.1|IPF15025.2|Contig4-3055_0023|CA2652|orf6.2845|orf6.4629|CaO19.1192|CaO19.8783|CAWG_05326	Ca21chr6_C_albicans_SC5314	Protein similar to S. cerevisiae Dna2p, which is a DNA replication factor involved in DNA repair; induced under hydroxyurea treatment	CAL0002159	GO:0004003|GO:0031860|GO:0042162|GO:0000014|GO:0000706|GO:0001302|GO:0043137|GO:0017108|GO:0005524|GO:0000784|GO:0005829|GO:0000739	GO:0004003=ATP-dependent DNA helicase activity|GO:0042162=telomeric DNA binding|GO:0000014=single-stranded DNA specific endodeoxyribonuclease activity|GO:0017108=5'-flap endonuclease activity|GO:0005524=ATP binding|GO:0000739=DNA strand annealing activity	GO:0000784=nuclear chromosome, telomeric region|GO:0005829=cytosol	GO:0031860=telomeric 3' overhang formation|GO:0000706=meiotic DNA double-strand break processing|GO:0001302=replicative cell aging|GO:0043137=DNA replication, removal of RNA primer	GO:0005524|GO:0042162|GO:0017108|GO:0000014|GO:0000739|GO:0004003|GO:0001302|GO:0031860|GO:0000706|GO:0043137|GO:0000784|GO:0005829
CAL0002161	-0.0270491	Detected	0.0270491	Detected	0	0.262885	Detected	0.10597	Detected	0.184428	0.156341	5447.75	5565.31	8026.31	5762.36	CAL0002161	CAL0002161	CAL0002161 (alignment of 60bp with 100.00% identity) , Description: Predicted ORF in Assemblies 19, 20 and 21, Location: Complement (60009..57658) in Candida albicans Ca21chr6, Gene: orf19.1195 , :: Next best Hit, CAL0003967 (alignment of 14bp with 100	GAATTAAAGCAAGGTGACTCACGAGCCATGGAAATTATTGGTCAGAATAGCAATTTATAG	CAL0002161	orf19.1195	2012-10-01	orf19.8786|IPF26128.1|IPF7154.2|Contig4-3055_0020|CA1374|orf6.2848|MIP1|CaO19.1195|OCT1|CaO19.8786|CAWG_05324	Ca21chr6_C_albicans_SC5314	Ortholog(s) have metalloendopeptidase activity, role in cellular iron ion homeostasis, protein processing involved in protein targeting to mitochondrion and mitochondrion localization	CAL0002161	GO:0005739|GO:0006879|GO:0006627|GO:0006508|GO:0004222	GO:0004222=metalloendopeptidase activity	GO:0005739=mitochondrion	GO:0006879=cellular iron ion homeostasis|GO:0006627=protein processing involved in protein targeting to mitochondrion|GO:0006508=proteolysis	GO:0004222|GO:0006508|GO:0006627|GO:0006879|GO:0005739
CAL0002162	-0.0914578	Detected	0.0914578	Detected	0	0.814996	Detected	0.772366	Detected	0.793681	0.0137125	1409.86	1574.8	3184.68	2474.87	CAL0002162	CAL0002162	CAL0002162 (alignment of 60bp with 100.00% identity) , Description: Predicted ORF in Assemblies 19, 20 and 21, Location: 60917..63502 in Candida albicans Ca21chr6, Gene: orf19.1196 , :: Next best Hit, CAL0002056 (alignment of 13bp with 100.00% identity	CCAACTCAACATTCAAACTTTGCATTTGCAGCAGCAGCAGCTGTGCACCACCAAAAATAA	CAL0002162	orf19.1196	PKH3	orf19.8787|IPF7158.2|IPF29542.1|Contig4-3055_0016|Contig4-3055_0017|Contig4-3055_0018|CA1375|orf6.2849|CaO19.1196|IPF7158|CAWG_05323	Ca21chr6_C_albicans_SC5314	Ortholog(s) have protein kinase activity and role in MAPK cascade involved in cell wall biogenesis, protein phosphorylation	CAL0002162	GO:0000196|GO:0004672|GO:0004674|GO:0006468|GO:0005575|GO:0005524	GO:0004672=protein kinase activity|GO:0004674=protein serine/threonine kinase activity|GO:0005524=ATP binding	GO:0005575=cellular_component	GO:0000196=MAPK cascade involved in cell wall biogenesis|GO:0006468=protein phosphorylation	GO:0004674|GO:0005524|GO:0004672|GO:0000196|GO:0006468|GO:0005575
CAL0002163	0.0412788	Detected	-0.0412788	Detected	0	0.220091	Detected	-0.107427	Detected	0.0563321	0.770436	636.282	591.268	867.957	553.637	CAL0002163	CAL0002163	CAL0002163 (alignment of 60bp with 100.00% identity) , Description: Predicted ORF in Assemblies 19, 20 and 21, Location: Complement (64239..63694) in Candida albicans Ca21chr6, Gene: orf19.1198 , :: Next best Hit, CAL0001745 (alignment of 18bp with 94.	AATGACAAATGTTTTTATCAAGACTGGATGCAAGCTTTTAAAAGAGCCTCCAATCCAAAG	CAL0002163	orf19.1198	YBL107C	orf19.8789|IPF7159.2|IPF29549.1|Contig4-3055_0014|CA1376|orf6.2851|orf6.2947|IPF7159|CaO19.1198|CAWG_05322	Ca21chr6_C_albicans_SC5314	Predicted ORF in Assemblies 19, 20 and 21; possibly an essential gene, disruptants not obtained by UAU1 method	CAL0002163	GO:0008150|GO:0003674|GO:0005737	GO:0003674=molecular_function	GO:0005737=cytoplasm	GO:0008150=biological_process	GO:0003674|GO:0008150|GO:0005737
CAL0002164	0.182498	Detected	-0.182498	Detected	0	-1.60667	Detected	-0.623377	Detected	-1.11503	0.167365	36699.9	28040	12796.5	20249.4	CAL0002164	CAL0002164	CAL0002164 (alignment of 60bp with 100.00% identity) , Description: Protein similar to S. cerevisiae Nop5p protein of small nucleolar ribonucleoprotein complex; transposon mutation affects filamentous growth; macrophage/pseudohyphal-induced; physically i	CACCTCTAAAGTTGTGAGAGAACAACCAAAAGTGGAAATAACCGAAGCCCGTGCTTATAA	CAL0002164	orf19.1199	NOP5	orf19.8790|IPF18691.2|IPF7161.1|Contig4-3055_0011|Contig4-3055_0012|NOP58|CA1438|orf6.2852|orf6.2946|CaO19.1199|CAWG_05321	Ca21chr6_C_albicans_SC5314	Protein similar to S. cerevisiae Nop5p protein of small nucleolar ribonucleoprotein complex; transposon mutation affects filamentous growth; macrophage/pseudohyphal-induced; physically interacts with TAP-tagged Nop1p	CAL0002164	GO:0000472|GO:0003674|GO:0030447|GO:0031428|GO:0032040|GO:0000480|GO:0000447|GO:0030686	GO:0003674=molecular_function	GO:0031428=box C/D snoRNP complex|GO:0032040=small-subunit processome|GO:0030686=90S preribosome	GO:0000472=endonucleolytic cleavage to generate mature 5'-end of SSU-rRNA from (SSU-rRNA, 5.8S rRNA, LSU-rRNA)|GO:0030447=filamentous growth|GO:0000480=endonucleolytic cleavage in 5'-ETS of tricistronic rRNA transcript (SSU-rRNA, 5.8S rRNA, LSU-rRNA)|GO:0000447=endonucleolytic cleavage in ITS1 to separate SSU-rRNA from 5.8S rRNA and LSU-rRNA from tricistronic rRNA transcript (SSU-rRNA, 5.8S rRNA,…	GO:0003674|GO:0030447|GO:0000472|GO:0000447|GO:0000480|GO:0032040|GO:0030686|GO:0031428
CAL0003025	0.133278	Detected	-0.133279	Detected	-2.38419e-07	-0.288216	Detected	-0.205093	Detected	-0.246655	0.219305	134.477	110	121	102.595	CAL0003025	CAL0003025	CAL0003025 (alignment of 60bp with 100.00% identity) , Description: Predicted ORF from Assembly 19; removed from Assembly 20; subsequently reinstated in Assembly 21 based on comparative genome analysis, Location: 220895..221668 in Candida albicans Ca21c	GGAGTTGGTGGTGGTGGACAATTTTACAAATATTTGGATTACTTATCAGTTTATTGGGAT	CAL0003025	orf19.120		orf19.7767|orf6.1441|orf6.405|Contig4-2238_0009|CA0067|STE142|CaO19.120|IPF13904|IPF13904.2|CAWG_05248	Ca21chr6_C_albicans_SC5314	Has domain(s) with predicted protein C-terminal S-isoprenylcysteine carboxyl O-methyltransferase activity, role in C-terminal protein methylation and integral to membrane localization	CAL0003025	GO:0004671|GO:0006481|GO:0016021	GO:0004671=protein C-terminal S-isoprenylcysteine carboxyl O-methyltransferase activity	GO:0016021=integral to membrane	GO:0006481=C-terminal protein methylation	GO:0004671|GO:0006481|GO:0016021
CAL0002759	0.123636	Detected	-0.123637	Detected	-2.38419e-07	0.522222	Detected	-0.080348	Detected	0.220937	0.56748	307.451	254.875	488.408	257.461	CAL0002759	CAL0002759	CAL0002759 (alignment of 60bp with 100.00% identity) , Description: Predicted ORF in Assemblies 19, 20 and 21; possibly spurious ORF (Annotation Working Group prediction), Location: Complement (67495..66500) in Candida albicans Ca21chr6, Gene: orf19.120	TTGTGCTGTGTATTATTAGTGTTGAGAGAGCAAGAATACCGGAAATTTAAAAGCGGTTAA	CAL0002759	orf19.1200		orf19.8791|IPF26140.1|IPF7163.1|Contig4-3055_0009|CA1437|orf6.2945|CaO19.8791|CaO19.1200|IPF7163|CAWG_05320	Ca21chr6_C_albicans_SC5314	Planktonic growth-induced gene	CAL0002759	GO:0008150|GO:0003674|GO:0005575	GO:0003674=molecular_function	GO:0005575=cellular_component	GO:0008150=biological_process	GO:0003674|GO:0008150|GO:0005575
CAL0002761	0.0825768	Detected	-0.0825768	Detected	0	0.742538	Detected	0.155959	Detected	0.449249	0.278309	2024.5	1776.6	3854.84	2054.7	CAL0002761	CAL0002761	CAL0002761 (alignment of 60bp with 100.00% identity) , Description: Predicted ORF in Assemblies 19, 20 and 21, Location: 67551..69041 in Candida albicans Ca21chr6, Gene: orf19.1201 , :: Next best Hit, CAL0001346 (alignment of 24bp with 91.67% identity)	TGTATGGCCGTCCCTAGAGTAATTGTTGCATTAATTGAACAAAACTTTAATGCAGAAAAG	CAL0002761	orf19.1201	DIA4	orf19.8792|IPF26135.1|IPF7165.1|Contig4-3055_0008|CA1436|orf6.2944|CaO19.1201|DIA4|IPF7165|CAWG_05319	Ca21chr6_C_albicans_SC5314	Ortholog(s) have serine-tRNA ligase activity, role in invasive growth in response to glucose limitation, mitochondrial seryl-tRNA aminoacylation, pseudohyphal growth and mitochondrion localization	CAL0002761	GO:0005739|GO:0001403|GO:0007124|GO:0004828|GO:0070158|GO:0005524	GO:0004828=serine-tRNA ligase activity|GO:0005524=ATP binding	GO:0005739=mitochondrion	GO:0001403=invasive growth in response to glucose limitation|GO:0007124=pseudohyphal growth|GO:0070158=mitochondrial seryl-tRNA aminoacylation	GO:0005524|GO:0004828|GO:0001403|GO:0007124|GO:0070158|GO:0005739
CAL0002763	-0.0697594	Detected	0.0697594	Detected	0	-0.35949	Detected	0.0112209	Detected	-0.174135	0.472002	1355.46	1469.17	1336.26	1382.94	CAL0002763	CAL0002763	CAL0002763 (alignment of 60bp with 100.00% identity) , Description: Predicted ORF in Assemblies 19, 20 and 21, Location: Complement (70422..69088) in Candida albicans Ca21chr6, Gene: orf19.1202 , :: Next best Hit, CAL0004519 (alignment of 16bp with 100	GCTAGTACTCCAGTTGTGCAAACTAGAAATATTCAATTTACCAACAATTCAGATGAAGAC	CAL0002763	orf19.1202		orf19.8793|IPF26137.1|IPF7166.2|Contig4-3055_0007|CA1435|orf6.2943|CaO19.1202|IPF7166|CAWG_05318	Ca21chr6_C_albicans_SC5314	Ortholog of C. parapsilosis CDC317 : CPAR2_603550, Candida tenuis NRRL Y-1498 : CANTEDRAFT_114325, Debaryomyces hansenii CBS767 : DEHA2G04950g and Candida dubliniensis CD36 : CD36_60350	CAL0002763	GO:0008150|GO:0003674|GO:0005575	GO:0003674=molecular_function	GO:0005575=cellular_component	GO:0008150=biological_process	GO:0003674|GO:0008150|GO:0005575
CAL0002765	-0.048523	Detected	0.048523	Detected	0	0.629781	Detected	-0.0171576	Detected	0.306312	0.447886	3829.16	4030	7384.38	3774.73	CAL0002765	CAL0002765	CAL0002765 (alignment of 60bp with 100.00% identity) , Description: Predicted ORF in Assemblies 19, 20 and 21; filament induced; fungal-specific (no human or murine homolog), Location: Complement (73882..70652) in Candida albicans Ca21chr6, Gene: orf19.	GTATAGAGGACCAGAAGAAATCAATGTACAGTGCTGCTGTAAAAAGTAAGTTTGGATTTT	CAL0002765	orf19.1203	SRO77	orf19.8794|IPF26148.1|IPF12463.2|Contig4-3055_0006|CA1434|orf6.2942|CaO19.1203|CaO19.8794|SNI2|CAWG_05317	Ca21chr6_C_albicans_SC5314	Protein with a predicted role in docking and fusion of post-Golgi vesicles with the plasma membrane; filament induced; fungal-specific (no human or murine homolog)	CAL0002765	GO:0003674|GO:0051286|GO:0005886|GO:0006893|GO:0032153|GO:0006887	GO:0003674=molecular_function	GO:0051286=cell tip|GO:0005886=plasma membrane|GO:0032153=cell division site	GO:0006893=Golgi to plasma membrane transport|GO:0006887=exocytosis	GO:0003674|GO:0006893|GO:0006887|GO:0051286|GO:0005886|GO:0032153
CAF0006923	0.0463095	Detected	-0.0463095	Detected	0	-0.364689	Detected	-0.26555	Detected	-0.315119	0.0433503	810.353	747.791	734.466	629.703	CAF0006923	CAF0006923	CAF0006923(alignment 60bp with 100.00% identity) , Description: ORF Predicted by Annotation Working Group, Location: 74162..74505 in Candida albicans Ca21chr6, Gene: orf19.1203.1 , :: Next best hit , location within target gene 179-238 , CAL0001994(alig	CCTTGGGTGTGGGTACATTTGTCGGAAAAGTTTTGATTAAAAATCAACAGAAACAGAAAA	CAF0006923	orf19.1203.1		IPF26149.1|IPF12464.1|Contig4-3055_0003|CA1433|orf6.2151|IPF12464|CAWG_05316	Ca21chr6_C_albicans_SC5314	Ortholog(s) have endoplasmic reticulum localization	CAF0006923	GO:0003674|GO:0005783|GO:0009059|GO:0030176	GO:0003674=molecular_function	GO:0005783=endoplasmic reticulum|GO:0030176=integral to endoplasmic reticulum membrane	GO:0009059=macromolecule biosynthetic process	GO:0003674|GO:0003674|GO:0009059|GO:0009059|GO:0005783|GO:0030176|GO:0005783|GO:0030176
CAL0002766	0.00911856	Detected	-0.00911856	Detected	0	-0.0656629	Detected	-0.118913	Detected	-0.092288	0.0817532	1947.84	1892.56	2228.75	1719.3	CAL0002766	CAL0002766	CAL0002766 (alignment of 60bp with 100.00% identity) , Description: Phosphorylated protein of unknown function, transcription is upregulated clinical isolates from HIV positive patients with oral candidiasis; predicted ORF in Assemblies 19, 20 and 21, Lo	GTCAAACCTTACAAAGGTGTCAAGTATATGACCAAGTCTGGTAATTATATAGTGAGATCA	CAL0002766	orf19.1204	APM3	orf19.8795|IPF26134.1|IPF12465.2|Contig4-3055_0002|CA1432|orf6.2941|CaO19.8795|APM3|CaO19.1204|CAWG_05315	Ca21chr6_C_albicans_SC5314	Phosphorylated protein of unknown function, transcription is upregulated clinical isolates from HIV positive patients with oral candidiasis	CAL0002766	GO:0003674|GO:0030131|GO:0006896|GO:0006886	GO:0003674=molecular_function	GO:0030131=clathrin adaptor complex	GO:0006896=Golgi to vacuole transport|GO:0006886=intracellular protein transport	GO:0003674|GO:0006896|GO:0006886|GO:0030131
CAL0002771	-0.172147	Compromised	0.172147	Compromised	0	0.21021	Compromised	-0.447179	Compromised	-0.118485	0.779747	9.38142	11.7192	14.7363	7.47853	CAL0002771	CAL0002771	CAL0002771 (alignment of 60bp with 100.00% identity) , Description: Predicted ORF in Assemblies 19, 20 and 21, Location: 847295..847627 in Candida albicans Ca21chr4, Gene: orf19.1207 , :: Next best Hit, CAL0003816 (alignment of 14bp with 100.00% identi	CCTCTCCTACACCAAGTATACAAGTGATATATATCTCTTTTCATTCCAGCAAATAAGACT	CAL0002771	orf19.1207		IPF27537.1|Contig4-2606_0009|orf6.840|CaO19.1207|CAWG_03416	Ca21chr4_C_albicans_SC5314	Ortholog of Candida dubliniensis CD36 : CD36_33200 and Candida albicans WO-1 : CAWG_03416
CAL0002772	0.0199847	Detected	-0.0199847	Detected	0	-0.976634	Detected	-0.563839	Detected	-0.770237	0.0654445	303	290	183	195	CAL0002772	CAL0002772	NOTE: Has potential for cross hybridization with other orfs; CAL0002772 (alignment 60 bp with 100 % identity) , Description: Predicted ORF in Assemblies 19, 20 and 21; member of a family encoded by FGR6-related orfs in the RB2 repeat sequence, Location: C	CCAATATTGAGTGCTAGTGTGGAAGAGATTGCAAATTTTGTAAGGGAGAGTTTTTGTTTA	CAL0002772	orf19.1208		IPF19849.1|Contig4-3026_0002|orf6.841	Ca21chr4_C_albicans_SC5314	Predicted ORF in Assemblies 19, 20 and 21; member of a family encoded by FGR6-related genes in the RB2 repeat sequence	CAL0002772	GO:0008150|GO:0003674|GO:0005575	GO:0003674=molecular_function	GO:0005575=cellular_component	GO:0008150=biological_process	GO:0003674|GO:0008150|GO:0005575
CAL0003027	0.027987	Detected	-0.027987	Detected	0	0.396826	Detected	0.0822272	Detected	0.239527	0.272576	52.0708	49.2869	81.0301	52.151	CAL0003027	CAL0003027	CAL0003027 (alignment of 60bp with 100.00% identity) , Description: Predicted ORF in Assemblies 19, 20 and 21; mutation confers hypersensitivity to cytochalasin D, Location: Complement (222243..221695) in Candida albicans Ca21chr6, Gene: orf19.121 , ::	ATTCCAAGTAAACATTGGTTAGCTTTTACAAAAAGAAAATTCATGAATAAAAGTTTATAA	CAL0003027	orf19.121	ARC18	orf19.7768|IPF27178.1|IPF13905.2|orf6.406|Contig4-2238_0008|CA0068|CaO19.7768|CaO19.121|CAWG_05247	Ca21chr6_C_albicans_SC5314	Putative ARP2/3 complex subunit; mutation confers hypersensitivity to cytochalasin D	CAL0003027	GO:0005739|GO:0034314|GO:0051654|GO:0003674|GO:0051286|GO:0005885|GO:0030479|GO:0005634|GO:0032153|GO:0035690|GO:0005829	GO:0003674=molecular_function	GO:0005739=mitochondrion|GO:0051286=cell tip|GO:0005885=Arp2/3 protein complex|GO:0030479=actin cortical patch|GO:0005634=nucleus|GO:0032153=cell division site|GO:0005829=cytosol	GO:0034314=Arp2/3 complex-mediated actin nucleation|GO:0051654=establishment of mitochondrion localization|GO:0035690=cellular response to drug	GO:0003674|GO:0035690|GO:0034314|GO:0051654|GO:0030479|GO:0005634|GO:0051286|GO:0005885|GO:0005829|GO:0005739|GO:0032153
CAL0002787	-0.110759	Detected	0.110759	Detected	0	0.798005	Detected	0.780498	Detected	0.789251	0.0192464	3660.78	4199.95	8282.46	6549.51	CAL0002787	CAL0002787	CAL0002787 (alignment of 60bp with 100.00% identity) , Description: Predicted ORF in Assemblies 19, 20 and 21, Location: 892798..894330 in Candida albicans Ca21chr6, Gene: orf19.1210 , :: Next best Hit, CAL0005461 (alignment of 15bp with 100.00% identi	GGGGGATTTTAGTTATGATCGTTTGTTTAAGTGCTACAATCTTTTTAGGTGCTACTCATT	CAL0002787	orf19.1210	AVT6	orf19.8799|IPF26117.1|IPF19126.1|CA0202|orf6.843|CaO19.1210|AVT5|CaO19.8799|IPF19126|CAWG_04969	Ca21chr6_C_albicans_SC5314	Ortholog(s) have L-aspartate transmembrane transporter activity, L-glutamate transmembrane transporter activity, L-histidine transmembrane transporter activity and L-lysine transmembrane transporter activity, more	CAL0002787	GO:0006995|GO:0005302|GO:0005290|GO:0005313|GO:0000329|GO:0015813|GO:0032975|GO:0015183|GO:0015181|GO:0032974|GO:0015828|GO:0015809|GO:0015817|GO:0015807|GO:0015189|GO:0015819	GO:0005302=L-tyrosine transmembrane transporter activity|GO:0005290=L-histidine transmembrane transporter activity|GO:0005313=L-glutamate transmembrane transporter activity|GO:0015183=L-aspartate transmembrane transporter activity|GO:0015181=arginine transmembrane transporter activity|GO:0015189=L-lysine transmembrane transporter activity	GO:0000329=fungal-type vacuole membrane	GO:0006995=cellular response to nitrogen starvation|GO:0015813=L-glutamate transport|GO:0032975=amino acid import into vacuole|GO:0032974=amino acid export from vacuole|GO:0015828=tyrosine transport|GO:0015809=arginine transport|GO:0015817=histidine transport|GO:0015807=L-amino acid transport|GO:0015819=lysine transport	GO:0005313|GO:0005290|GO:0015189|GO:0005302|GO:0015181|GO:0015183|GO:0015819|GO:0015809|GO:0015828|GO:0015807|GO:0032974|GO:0032975|GO:0015817|GO:0006995|GO:0015813|GO:0000329
CAL0002790	0.142857	Detected	-0.142857	Detected	0	-0.238837	Detected	-0.0627055	Detected	-0.150771	0.463782	3998.75	3227.77	3698.65	3344.91	CAL0002790	CAL0002790	CAL0002790 (alignment of 60bp with 100.00% identity) , Description: Predicted ORF in Assemblies 19, 20 and 21, Location: 890242..891648 in Candida albicans Ca21chr6, Gene: orf19.1212 , :: Next best Hit, CAL0000380 (alignment of 15bp with 100.00% identi	GTCAGTGGTATTTCATTACCAGTTGCTTTAGTTTTAGTACTCATTGCTTTCCTTATTGGT	CAL0002790	orf19.1212	SCS2	orf19.8800|IPF9515.2|IPF16581.1|Contig4-2317_0008|CA1535|orf6.3085|orf6.845|IPF9515|CAWG_04970	Ca21chr6_C_albicans_SC5314	Ortholog(s) have FFAT motif binding, phosphatidylinositol binding activity	CAL0002790	GO:0031965|GO:0032377|GO:0006348|GO:0005198|GO:0005934|GO:0030176|GO:0048309|GO:0008654|GO:0042992|GO:0035091|GO:0033149	GO:0005198=structural molecule activity|GO:0035091=phosphatidylinositol binding|GO:0033149=FFAT motif binding	GO:0031965=nuclear membrane|GO:0005934=cellular bud tip|GO:0030176=integral to endoplasmic reticulum membrane	GO:0032377=regulation of intracellular lipid transport|GO:0006348=chromatin silencing at telomere|GO:0048309=endoplasmic reticulum inheritance|GO:0008654=phospholipid biosynthetic process|GO:0042992=negative regulation of transcription factor import into nucleus	GO:0005198|GO:0033149|GO:0035091|GO:0008654|GO:0048309|GO:0042992|GO:0006348|GO:0032377|GO:0031965|GO:0030176|GO:0005934
CAL0002793	0.0382981	Detected	-0.0382981	Detected	0	-0.00331545	Detected	-0.0308795	Detected	-0.0170975	0.715268	7115.2	6639.21	8330.69	6541.89	CAL0002793	CAL0002793	CAL0002793 (alignment of 60bp with 100.00% identity) , Description: Predicted ORF in Assemblies 19, 20 and 21, Location: 886677..888020 in Candida albicans Ca21chr6, Gene: orf19.1214 , :: Next best Hit, CAL0003286 (alignment of 16bp with 100.00% identi	CATGGTATTGTCGAAGAATATCCTCCAATTGTTGATAAAAGAGGTAGTTATACTGCTCAA	CAL0002793	orf19.1214	MAP2	orf19.8802|IPF26119.1|IPF9511.2|Contig4-2370_0007|CA1534|orf6.3083|MAP2|CaO19.8802|CaO19.1214|CAWG_04971	Ca21chr6_C_albicans_SC5314	Ortholog(s) have metalloaminopeptidase activity, role in protein initiator methionine removal involved in protein maturation and cytosol localization	CAL0002793	GO:0006508|GO:0070006|GO:0035551|GO:0005829	GO:0070006=metalloaminopeptidase activity	GO:0005829=cytosol	GO:0006508=proteolysis|GO:0035551=protein initiator methionine removal involved in protein maturation	GO:0070006|GO:0035551|GO:0006508|GO:0005829
CAL0002795	0.153584	Detected	-0.153585	Compromised	-4.76837e-07	0.0542069	Compromised	0.380844	Compromised	0.217525	0.434263	13.3	10.5772	14.9609	15.0177	CAL0002795	CAL0002795	CAL0002795 (alignment of 60bp with 100.00% identity) , Description: Predicted ORF in Assemblies 19, 20 and 21, Location: Complement (885640..884297) in Candida albicans Ca21chr6, Gene: orf19.1215 , :: Next best Hit, CAL0001974 (alignment of 14bp with 1	GTCATAAACTGAATCAACATAAGCCTAAAAATCATTGTTCAAGCCCAGACAAAACCAAAG	CAL0002795	orf19.1215		orf19.8803|IPF9510.2|IPF29538.1|Contig4-2370_0003|Contig4-2370_0004|CA1533|orf6.3082|CaO19.8803|CaO19.1215|IPF9510|CAWG_04972	Ca21chr6_C_albicans_SC5314	Ortholog of Candida dubliniensis CD36 : CD36_64550, Candida tropicalis MYA-3404 : CTRG_02747 and Candida albicans WO-1 : CAWG_04972	CAL0002795	GO:0008150|GO:0003674|GO:0005575	GO:0003674=molecular_function	GO:0005575=cellular_component	GO:0008150=biological_process	GO:0003674|GO:0008150|GO:0005575
CAL0002796	0.00971889	Detected	-0.00971889	Detected	0	-0.419092	Detected	-0.153294	Detected	-0.286193	0.164804	11896.2	11549	10649.9	10248.9	CAL0002796	CAL0002796	CAL0002796 (alignment of 60bp with 100.00% identity) , Description: Predicted ORF in Assemblies 19, 20 and 21, Location: 881560..884196 in Candida albicans Ca21chr6, Gene: orf19.1217 , :: Next best Hit, CAL0004609 (alignment of 15bp with 100.00% identi	TTCAAGAGTTCGGGTAGTTCAACTTGTCCACTTTGTCGATCAACATTCAATTTCAGAAGG	CAL0002796	orf19.1217	RKR1	orf19.8806|IPF9507.2|IPF16011.2|Contig4-2370_0009|CA1532|orf6.669|orf6.3079|CaO19.1217|IPF9507.3f|IPF9507|CAWG_04973	Ca21chr6_C_albicans_SC5314	Ortholog(s) have ribosome binding, ubiquitin-protein ligase activity, role in chromatin modification, chromatin silencing at telomere, protein ubiquitination, ubiquitin-dependent protein catabolic process and nucleus, ribosome localization	CAL0002796	GO:0006511|GO:0004842|GO:0016567|GO:0006348|GO:0005840|GO:0043022|GO:0005634|GO:0008270|GO:0016568	GO:0004842=ubiquitin-protein ligase activity|GO:0043022=ribosome binding|GO:0008270=zinc ion binding	GO:0005840=ribosome|GO:0005634=nucleus	GO:0006511=ubiquitin-dependent protein catabolic process|GO:0016567=protein ubiquitination|GO:0006348=chromatin silencing at telomere|GO:0016568=chromatin modification	GO:0008270|GO:0043022|GO:0004842|GO:0006511|GO:0016567|GO:0006348|GO:0016568|GO:0005840|GO:0005634
CAL0002798	-0.214197	Detected	0.214197	Detected	-2.38419e-07	-0.558479	Detected	-0.468462	Detected	-0.513471	0.143578	40.0689	53.0585	38.0355	32.4046	CAL0002798	CAL0002798	CAL0002798 (alignment of 60bp with 100.00% identity) , Description: Predicted ORF in Assemblies 19, 20 and 21, Location: 879846..881048 in Candida albicans Ca21chr6, Gene: orf19.1219 , :: Next best Hit, CAL0000747 (alignment of 17bp with 100.00% identi	CAGGTGCATTAAAATTGTGCATTAAAGACACTGGATTTATTTACCGTGGAATCAACTGTA	CAL0002798	orf19.1219		IPF29539.1|CA6186|orf6.671|CaO19.1219|IPF9507.5f|CAWG_04974	Ca21chr6_C_albicans_SC5314	Ortholog of Spathaspora passalidarum NRRL Y-27907 : SPAPADRAFT_149713 and Candida albicans WO-1 : CAWG_04974	CAL0002798	GO:0008150|GO:0003674|GO:0005575	GO:0003674=molecular_function	GO:0005575=cellular_component	GO:0008150=biological_process	GO:0003674|GO:0008150|GO:0005575
CAL0003029	0.01864	Detected	-0.01864	Detected	0	0.17969	Detected	-0.17988	Detected	-9.48906e-05	0.999629	1889.95	1812.24	2546.54	1588.66	CAL0003029	CAL0003029	CAL0003029 (alignment of 60bp with 100.00% identity) , Description: Protein similar to S. cerevisiae Cdc20p; induced under Cdc5p depletion; member of conserved Mcm1p regulon; mRNA expression peaks at cell-cycle G2/M phase; mRNA binds to She3p and is loca	CGGACAATTTAACTTTAGCCACGGTTGCTGGTGATGAAAATTTGAAATTTTGGTCATTAT	CAL0003029	orf19.122	CDC20	orf19.7769|IPF13908.2|IPF19430.2|orf6.139|orf6.2609|Contig4-2238_0005|CA1218|CaO19.122|CAWG_05246	Ca21chr6_C_albicans_SC5314	Protein similar to S. cerevisiae Cdc20p; induced under Cdc5p depletion; member of conserved Mcm1p regulon; mRNA expression peaks at cell-cycle G2/M phase; mRNA binds to She3p and is localized to buds of yeast-form cells and hyphal tips	CAL0003029	GO:0007094|GO:0007092|GO:0010997|GO:0005816|GO:0032153|GO:0097027|GO:0000093|GO:0007133|GO:0000070|GO:0008054|GO:0033597|GO:0051487|GO:0005680|GO:0000089|GO:0000778|GO:0034613|GO:0033314	GO:0010997=anaphase-promoting complex binding|GO:0097027=ubiquitin-protein ligase activator activity	GO:0005816=spindle pole body|GO:0032153=cell division site|GO:0033597=mitotic checkpoint complex|GO:0005680=anaphase-promoting complex|GO:0000778=condensed nuclear chromosome kinetochore	GO:0007094=mitotic cell cycle spindle assembly checkpoint|GO:0007092=activation of mitotic anaphase-promoting complex activity|GO:0000093=mitotic telophase|GO:0007133=meiotic anaphase I|GO:0000070=mitotic sister chromatid segregation|GO:0008054=cyclin catabolic process|GO:0051487=activation of anaphase-promoting complex activity involved in meiotic cell cycle|GO:0000089=mitotic metaphase|GO:00346…	GO:0010997|GO:0097027|GO:0000089|GO:0000093|GO:0007094|GO:0051487|GO:0007133|GO:0033314|GO:0000070|GO:0007092|GO:0008054|GO:0034613|GO:0033597|GO:0000778|GO:0005816|GO:0032153|GO:0005680
CAL0002827	0.0840459	Detected	-0.0840459	Detected	0	0.251491	Detected	0.290277	Detected	0.270884	0.0881845	13299.6	11647.3	17999.7	14800	CAL0002827	CAL0002827	CAL0002827 (alignment of 60bp with 100.00% identity) , Description: Protein involved in endocytosis; contains a BAR domain; null mutant exhibits defects in hyphal growth, virulence, cell wall integrity, and actin patch localization; cosediments with phos	TGGACTGGTAAATACAATGGTCAAACCGGTGTGTTCCCTGGTAATTATGTGCAATTATAG	CAL0002827	orf19.1220	RVS167	orf19.8807|IPF26118.1|IPF9505.1|Contig4-2488_0001|CA1531|orf6.3078|CaO19.8807|CaO19.1220|CAWG_04975	Ca21chr6_C_albicans_SC5314	SH3-domain- and BAR domain-containing protein involved in endocytosis; null mutant exhibits defects in hyphal growth, virulence, cell wall integrity, and actin patch localization; cosediments with phosphorylated Myo5p	CAL0002827	GO:0043332|GO:0008092|GO:0030448|GO:0006348|GO:0031505|GO:0030479|GO:0036180|GO:0006974|GO:0008289|GO:0006897|GO:0007346|GO:0060988|GO:0007163|GO:0000723|GO:0030702|GO:0071216|GO:0051666|GO:0009405	GO:0008092=cytoskeletal protein binding|GO:0008289=lipid binding	GO:0043332=mating projection tip|GO:0030479=actin cortical patch	GO:0030448=hyphal growth|GO:0006348=chromatin silencing at telomere|GO:0031505=fungal-type cell wall organization|GO:0036180=filamentous growth of a population of unicellular organisms in response to biotic stimulus|GO:0006974=response to DNA damage stimulus|GO:0006897=endocytosis|GO:0007346=regulation of mitotic cell cycle|GO:0060988=lipid tube assembly|GO:0007163=establishment or maintenance of…	GO:0008289|GO:0008092|GO:0006897|GO:0051666|GO:0031505|GO:0009405|GO:0036180|GO:0051666|GO:0030448|GO:0007346|GO:0006348|GO:0030702|GO:0007163|GO:0060988|GO:0006974|GO:0000723|GO:0071216|GO:0030479|GO:0043332
CAL0002829	0.101982	Detected	-0.101982	Detected	0	-0.0890803	Detected	-0.112387	Detected	-0.100734	0.429885	1749.97	1494.92	1847.29	1454.92	CAL0002829	CAL0002829	CAL0002829 (alignment of 60bp with 100.00% identity) , Description: Putative mannosyltransferase involved in cell wall mannan biosynthesis; transcription is elevated in chk1, nik1, and sln1 homozygous null mutants, Location: 876484..877821 in Candida al	TGGTAATAATCTCGATGAAGCAACTGGTTATACTGAAACAGGCGATTTTACAAAATGGTC	CAL0002829	orf19.1221	ALG2	orf19.8808|IPF26120.1|IPF9503.2|Contig4-2488_0004|CA1530|orf6.3077|CaO19.8808|CaO19.1221|ALG2.5|CAWG_04976	Ca21chr6_C_albicans_SC5314	Putative mannosyltransferase involved in cell wall mannan biosynthesis; transcription is elevated in chk1, nik1, and sln1 homozygous null mutants	CAL0002829	GO:0006490|GO:0033164|GO:0005575|GO:0004378	GO:0033164=glycolipid 6-alpha-mannosyltransferase activity|GO:0004378=GDP-Man:Man1GlcNAc2-PP-Dol alpha-1,3-mannosyltransferase activity	GO:0005575=cellular_component	GO:0006490=oligosaccharide-lipid intermediate biosynthetic process	GO:0033164|GO:0004378|GO:0006490|GO:0005575
CAL0002833	-0.0174618	Detected	0.0174618	Detected	0	-0.346567	Detected	-0.221099	Detected	-0.283833	0.0488148	10410.7	10494.9	9986.86	8720.04	CAL0002833	CAL0002833	CAL0002833 (alignment of 60bp with 100.00% identity) , Description: Essential serine/threonine protein kinase involved in mitotic spindle formation and cytokinesis; required for septum formation, exit from mitosis, and normal hyphal morphoorfsis; virulen	ACAGAAAACCCCTCCATTTACTCCCCAATTGGATAATGAAGAAGATGCCGGTTATTTCGA	CAL0002833	orf19.1223	DBF2	orf19.8809|IPF26112.1|IPF13853.2|Contig4-1569_0001|CA0205|orf6.851|CaO19.8809|CaO19.1223|CAWG_04401	Ca21chr2_C_albicans_SC5314	Essential serine/threonine protein kinase involved in mitotic spindle formation and cytokinesis; required for septum formation, exit from mitosis, and normal hyphal morphogenesis; virulence-group-correlated expression	CAL0002833	GO:0030448|GO:0000280|GO:0034973|GO:0005816|GO:0007096|GO:0005524|GO:0005829|GO:0000910|GO:0031028|GO:0004674|GO:0007035|GO:0006468|GO:0007052|GO:0061167|GO:0005935|GO:0031097	GO:0005524=ATP binding|GO:0004674=protein serine/threonine kinase activity	GO:0034973=Sid2-Mob1 complex|GO:0005816=spindle pole body|GO:0005829=cytosol|GO:0005935=cellular bud neck|GO:0031097=medial cortex	GO:0030448=hyphal growth|GO:0000280=nuclear division|GO:0007096=regulation of exit from mitosis|GO:0000910=cytokinesis|GO:0031028=septation initiation signaling cascade|GO:0007035=vacuolar acidification|GO:0006468=protein phosphorylation|GO:0007052=mitotic spindle organization|GO:0061167=maintenance of endoplasmic reticulum location involved in endoplasmic reticulum polarization at cell division …	GO:0004674|GO:0005524|GO:0004674|GO:0006468|GO:0000910|GO:0007096|GO:0007052|GO:0030448|GO:0000280|GO:0006468|GO:0061167|GO:0031028|GO:0007035|GO:0031097|GO:0005829|GO:0034973|GO:0005935|GO:0005816
CAL0002835	-0.0811486	Detected	0.0811486	Detected	0	-0.119251	Detected	0.184248	Detected	0.0324988	0.867635	4782.49	5266.2	5613.13	5544.82	CAL0002835	CAL0002835	CAL0002835 (alignment of 60bp with 100.00% identity) , Description: Upregulated in the presence of human neutrophils; fluconazole-downregulated; repressed by nitric oxide, Location: 1365218..1366075 in Candida albicans Ca21chr2, Gene: orf19.1224 , :: Ne	GTTTGGTTTAATTACTGCTTTTGTTGCTTGGTATAATGCTTATGCTGGTATTGCTAATCC	CAL0002835	orf19.1224	FRP3	orf19.8810|IPF13846.3|IPF16160.1|Contig4-2326_0009|CA0415|orf6.1315|orf6.361|AFF1|CaO19.1224|ATO3	Ca21chr2_C_albicans_SC5314	Putative ammonium transporter; upregulated in the presence of human neutrophils; fluconazole-downregulated; repressed by nitric oxide	CAL0002835	GO:0005739|GO:0005794|GO:0005886|GO:0005783|GO:0015696|GO:0019740|GO:0000329|GO:0008519	GO:0008519=ammonium transmembrane transporter activity	GO:0005739=mitochondrion|GO:0005794=Golgi apparatus|GO:0005886=plasma membrane|GO:0005783=endoplasmic reticulum|GO:0000329=fungal-type vacuole membrane	GO:0015696=ammonium transport|GO:0019740=nitrogen utilization	GO:0008519|GO:0019740|GO:0015696|GO:0005886|GO:0000329|GO:0005783|GO:0005794|GO:0005739
CAL0002837	0.157529	Detected	-0.157529	Detected	0	0.795197	Detected	0.522316	Detected	0.658756	0.087191	36.6579	28.9943	68.7298	45.5324	CAL0002837	CAL0002837	CAL0002837 (alignment of 60bp with 100.00% identity) , Description: Predicted ORF in Assemblies 19, 20 and 21; possibly spurious ORF (Annotation Working Group prediction), Location: Complement (1367676..1367053) in Candida albicans Ca21chr2, Gene: orf19	CTACTCCCACTAATAAAGATAAGAAGCAAAGAGAACTAGATGGAAGTAGTACTGATATAG	CAL0002837	orf19.1225	PEX22	orf19.8811|IPF26113.1|IPF17492.2|Contig4-2326_0011|CA0416|orf6.1316|CaO19.1225|IPF17492|CAWG_05768	Ca21chr2_C_albicans_SC5314	Putative peroxin	CAL0002837	GO:0008150|GO:0003674|GO:0005575	GO:0003674=molecular_function	GO:0005575=cellular_component	GO:0008150=biological_process	GO:0003674|GO:0008150|GO:0005575
CAL0002840	0.137975	Detected	-0.137975	Detected	0	-0.0342655	Detected	0.369881	Detected	0.167808	0.563658	41.233	33.5091	44.0977	46.7085	CAL0002840	CAL0002840	CAL0002840 (alignment of 60bp with 100.00% identity) , Description: Putative transcription factor with zinc cluster DNA-binding motif; possibly spurious ORF (Annotation Working Group prediction), Location: 1666503..1667093 in Candida albicans Ca21chr1,	ATTGACGTTGATGGTGATGGTGAGCTGGTGGTTAATGATCAACTGAATAATTCACCATGA	CAL0002840	orf19.1227	ZCF4	orf19.8813|IPF26088.1|IPF19850.1|Contig4-1474_0002|CA0208|orf6.867|CaO19.8813|CaO19.1227|IPF19850|CAWG_00650	Ca21chr1_C_albicans_SC5314	Putative transcription factor with zinc cluster DNA-binding motif	CAL0002840	GO:0006355|GO:0003700|GO:0005634|GO:0008270	GO:0003700=sequence-specific DNA binding transcription factor activity|GO:0008270=zinc ion binding	GO:0005634=nucleus	GO:0006355=regulation of transcription, DNA-dependent	GO:0003700|GO:0008270|GO:0006355|GO:0005634
CAL0002841	-0.139727	Detected	0.139727	Detected	0	-0.489623	Detected	-0.150579	Detected	-0.320101	0.282413	1406.54	1679.82	1329.97	1346.56	CAL0002841	CAL0002841	CAL0002841 (alignment of 60bp with 100.00% identity) , Description: CCAAT-binding factor regulates low-iron (chelation) induction of FRP1 transcription, and under these conditions CBF comprises Hap43p and probably Hap2p and Hap3p, Location: 1668206..1669	GACCTCGTGGTCAAGGTGGAAGATTTTTAACTGCTGCTGAAATTGCTGAATTGGAGAAAG	CAL0002841	orf19.1228	HAP2	orf19.8814|IPF18396.2|IPF16519.2|CA0209|orf6.5088|orf6.868|CaO19.1228|CA2983|IPF18396|IPF18396.1|CAWG_00649	Ca21chr1_C_albicans_SC5314	CCAAT-binding factor regulates low-iron induction of FRP1, in these conditions CBF comprises Hap43p and probably Hap2p and Hap3p; possibly an essential gene, disruptants not obtained by UAU1 method; Cap1p-dependent induction in low iron	CAL0002841	GO:0071280|GO:0001077|GO:0016602|GO:0003700|GO:0043457|GO:0000978|GO:0071469|GO:0003677|GO:0000436	GO:0001077=RNA polymerase II core promoter proximal region sequence-specific DNA binding transcription factor activity involved in positive regulation of transcription|GO:0003700=sequence-specific DNA binding transcription factor activity|GO:0000978=RNA polymerase II core promoter proximal region sequence-specific DNA binding|GO:0003677=DNA binding	GO:0016602=CCAAT-binding factor complex	GO:0071280=cellular response to copper ion|GO:0043457=regulation of cellular respiration|GO:0071469=cellular response to alkalinity|GO:0000436=carbon catabolite activation of transcription from RNA polymerase II promoter	GO:0003677|GO:0003700|GO:0000978|GO:0001077|GO:0071469|GO:0071280|GO:0043457|GO:0000436|GO:0016602
CAL0002842	-0.00973988	Detected	0.00973988	Detected	0	-0.352628	Detected	-0.140788	Detected	-0.246708	0.146194	6670.86	6653.24	6338.45	5875.88	CAL0002842	CAL0002842	CAL0002842 (alignment of 60bp with 100.00% identity) , Description: Predicted ORF in Assemblies 19, 20 and 21, Location: Complement (1672965..1669828) in Candida albicans Ca21chr1, Gene: orf19.1229 , :: Next best Hit, CAL0005075 (alignment of 17bp with	GTAGTACTATTGCTACTACTATCTCTGGTGGTCAACAACCATTGAATGAATTAGATTTAG	CAL0002842	orf19.1229	CSE1	orf19.8815|orf19.8816|IPF16520.2|IPF26077.1|IPF19119.2|IPF29521.1|IPF13285.2|Contig4-2208_0002|Contig4-1270_0001|Contig4-1270_0002|CA6253|CA2982|CA2981|orf6.5087|orf6.869|orf6.5086|orf19.1230|orf19.1231|CSE1.3f|CAWG_00648	Ca21chr1_C_albicans_SC5314	Ortholog(s) have importin-alpha export receptor activity, role in cell division, protein export from nucleus and nuclear membrane localization	CAL0002842	GO:0031965|GO:0005737|GO:0008283|GO:0006611|GO:0008262|GO:0051301	GO:0008262=importin-alpha export receptor activity	GO:0031965=nuclear membrane|GO:0005737=cytoplasm	GO:0008283=cell proliferation|GO:0006611=protein export from nucleus|GO:0051301=cell division	GO:0008262|GO:0051301|GO:0006611|GO:0008283|GO:0005737|GO:0031965
CAL0003031	0.050756	Detected	-0.0507565	Detected	-2.38419e-07	-0.267407	Detected	-0.2944	Detected	-0.280904	0.0332247	215.48	197.622	208.281	163.623	CAL0003031	CAL0003031	CAL0003031 (alignment of 60bp with 100.00% identity) , Description: Protein involved in calcineurin-dependent signaling that controls stress response and virulence; inhibits calcineurin function, Location: 226997..227629 in Candida albicans Ca21chr6, Ge	GATAGTGGTATTAGTGAAGATGATGATGGATGTGAAAGTATTAAAAAGGTGGAACTTCCG	CAL0003031	orf19.123	RCN1	orf19.7770|IPF13909.1|IPF7047.3|orf6.138|orf6.2608|Contig4-2238_0001|Contig4-2900_0028|CA1217|CaO19.123|IPF13909|CAWG_05245	Ca21chr6_C_albicans_SC5314	Protein involved in calcineurin-dependent signaling that controls stress response and virulence; inhibits calcineurin function	CAL0003031	GO:0008597|GO:0019722|GO:0032512|GO:0032513|GO:0033554|GO:0005575	GO:0008597=calcium-dependent protein serine/threonine phosphatase regulator activity	GO:0005575=cellular_component	GO:0019722=calcium-mediated signaling|GO:0032512=regulation of protein phosphatase type 2B activity|GO:0032513=negative regulation of protein phosphatase type 2B activity|GO:0033554=cellular response to stress	GO:0008597|GO:0008597|GO:0019722|GO:0019722|GO:0033554|GO:0032513|GO:0032513|GO:0032512|GO:0005575
CAL0002875	0.211902	Detected	-0.211902	Detected	0	-0.407401	Detected	-0.146816	Detected	-0.277108	0.381212	7947.73	5829.78	6234.98	5978.59	CAL0002875	CAL0002875	CAL0002875 (alignment of 60bp with 100.00% identity) , Description: GDP-mannose transporter; essential; required for glycosylation, hyphal growth; functional homolog of S. cerevisiae Vrg4p, which imports GDP-mannose from cytoplasm to Golgi for protein an	CGTTGGTTTTGGTGCAGGATTAGTTTATGCTGTTGCTAAACAAAAACAACAAAAAGAACA	CAL0002875	orf19.1232	VRG4	orf19.8817|IPF26079.1|IPF13284.2|Contig4-2208_0006|CA2980|orf6.5085|CaO19.1232|GOG5|CaO19.8817|CAWG_00647	Ca21chr1_C_albicans_SC5314	GDP-mannose transporter; essential; required for glycosylation, hyphal growth; functional homolog of S. cerevisiae Vrg4p, which imports GDP-mannose from cytoplasm to Golgi for protein and lipid mannosylation; no mammalian homolog	CAL0002875	GO:0005739|GO:0030448|GO:0005794|GO:0015784|GO:0006486|GO:0016021|GO:0006487|GO:0005458	GO:0005458=GDP-mannose transmembrane transporter activity	GO:0005739=mitochondrion|GO:0005794=Golgi apparatus|GO:0016021=integral to membrane	GO:0030448=hyphal growth|GO:0015784=GDP-mannose transport|GO:0006486=protein glycosylation|GO:0006487=protein N-linked glycosylation	GO:0005458|GO:0015784|GO:0030448|GO:0006486|GO:0006487|GO:0005739|GO:0005794|GO:0005794|GO:0016021
CAL0002876	0.0780973	Detected	-0.0780973	Detected	0	-0.185862	Detected	-0.595046	Detected	-0.390454	0.216532	5554.35	4904.57	5574.35	3359.99	CAL0002876	CAL0002876	CAL0002876 (alignment of 60bp with 100.00% identity) , Description: Predicted ORF in Assemblies 19, 20 and 21; flucytosine induced, Location: Complement (1678759..1677134) in Candida albicans Ca21chr1, Gene: orf19.1233 , :: Next best Hit, CAL0005070 (al	CACCAAGGCATTAGTTGGATTTAATCGTGATGAAAATGAAATTGCTCAAGTTATTGGTGC	CAL0002876	orf19.1233	ADE4	orf19.8818|IPF26073.1|IPF13283.2|Contig4-1515_0003|CA2979|orf6.5084|CaO19.8818|CaO19.1233|CAWG_00646	Ca21chr1_C_albicans_SC5314	Putative phosphoribosylpyrophosphate amidotransferase; flucytosine induced	CAL0002876	GO:0005737|GO:0009116|GO:0009113|GO:0004044|GO:0006189	GO:0004044=amidophosphoribosyltransferase activity	GO:0005737=cytoplasm	GO:0009116=nucleoside metabolic process|GO:0009113=purine base biosynthetic process|GO:0006189='de novo' IMP biosynthetic process	GO:0004044|GO:0006189|GO:0009116|GO:0009113|GO:0005737
CAL0002878	0.0986085	Detected	-0.0986085	Detected	0	-1.1432	Detected	-0.672494	Detected	-0.907846	0.0707254	1150	987	586	650	CAL0002878	CAL0002878	NOTE: Has potential for cross hybridization with other orfs; CAL0002878 (alignment 60 bp with 100 % identity) , Description: Protein lacking an ortholog in S. cerevisiae; member of a family encoded by FGR6-related orfs in the RB2 repeat sequence; transpos	CCTAATGGAAGCACAGTTACTAGAATAGATGACCTTCTACTTGTTTCTTTTCGAAAAGTT	CAL0002878	orf19.1234	FGR6-10	orf19.8819|IPF26070.1|IPF10582.1|Contig4-2111_0005|Contig4-1717_0002|CA2978|orf6.5083|CaO19.1234|CaO19.8819|IFV2|CAWG_03269	Ca21chr4_C_albicans_SC5314	Protein lacking an ortholog in S. cerevisiae; member of a family encoded by FGR6-related genes in the RB2 repeat sequence; transposon mutation affects filamentous growth	CAL0002878	GO:0003674|GO:0030447|GO:0036170|GO:0071216|GO:0005575|GO:0036180|GO:0009267	GO:0003674=molecular_function	GO:0005575=cellular_component	GO:0030447=filamentous growth|GO:0036170=filamentous growth of a population of unicellular organisms in response to starvation|GO:0071216=cellular response to biotic stimulus|GO:0036180=filamentous growth of a population of unicellular organisms in response to biotic stimulus|GO:0009267=cellular response to starvation	GO:0003674|GO:0030447|GO:0009267|GO:0036170|GO:0036180|GO:0071216|GO:0005575
CAL0002880	-0.011107	Detected	0.011107	Detected	0	0.00525427	Detected	-0.277875	Detected	-0.136311	0.438383	14149.9	14139.3	17246.5	11344.6	CAL0002880	CAL0002880	CAL0002880 (alignment of 60bp with 100.00% identity) , Description: Putative L-aspartate 4-P-transferase; fungal-specific (no human or murine homolog); regulated by Gcn2p and Gcn4p, Location: 1210282..1211916 in Candida albicans Ca21chr4, Gene: orf19.12	TCAGCAATTGGCGATTCCCTGGCTGTGGATACACGTTTGGAAGCATTAAAACTACTGTAG	CAL0002880	orf19.1235	HOM3	orf19.8820|IPF26072.1|IPF14675.2|CA2977|orf6.5082|CaO19.8820|CaO19.1235|CAWG_03268	Ca21chr4_C_albicans_SC5314	Putative L-aspartate 4-P-transferase; fungal-specific (no human or murine homolog); regulated by Gcn2p and Gcn4p; early-stage biofilm-induced gene	CAL0002880	GO:0004072|GO:0009086|GO:0016597|GO:0009090|GO:0005829|GO:0009088	GO:0004072=aspartate kinase activity|GO:0016597=amino acid binding	GO:0005829=cytosol	GO:0009086=methionine biosynthetic process|GO:0009090=homoserine biosynthetic process|GO:0009088=threonine biosynthetic process	GO:0016597|GO:0004072|GO:0009090|GO:0009088|GO:0009086|GO:0005829
CAL0002882	0.210713	Detected	-0.210713	Detected	0	-0.56254	Detected	-0.577719	Detected	-0.570129	0.113879	5388.66	3959.19	3799.53	3009.4	CAL0002882	CAL0002882	CAL0002882 (alignment of 60bp with 100.00% identity) , Description: Predicted ORF in Assemblies 19, 20 and 21, Location: Complement (1213108..1212143) in Candida albicans Ca21chr4, Gene: orf19.1236 , :: Next best Hit, CAL0006354 (alignment of 17bp with	GAACAACATAAATTGAGTGGTAGTGCTACTAGTGGCAGAGAATCCGGTGATTTTGACATT	CAL0002882	orf19.1236	GVP36	orf19.8821|IPF14676.2|IPF12543.2|Contig4-2681_0004|CA2976|orf6.5081|orf6.710|CaO19.1236|IPF14676|CAWG_03267	Ca21chr4_C_albicans_SC5314	Ortholog(s) have role in endocytosis, establishment or maintenance of actin cytoskeleton polarity, vacuole organization and integral to Golgi membrane localization	CAL0002882	GO:0003674|GO:0030173|GO:0030950|GO:0007033|GO:0006897	GO:0003674=molecular_function	GO:0030173=integral to Golgi membrane	GO:0030950=establishment or maintenance of actin cytoskeleton polarity|GO:0007033=vacuole organization|GO:0006897=endocytosis	GO:0003674|GO:0007033|GO:0006897|GO:0030950|GO:0030173
CAL0002883	0.049067	Detected	-0.049067	Detected	0	0.388749	Detected	0.341334	Detected	0.365041	0.0215669	926.553	851.759	1413.01	1094.44	CAL0002883	CAL0002883	CAL0002883 (alignment of 60bp with 100.00% identity) , Description: Aromatic transaminase of the Ehrlich fusel oil pathway of aromatic alcohol biosynthesis; Rim101p-dependent pH-regulation (alkaline induced), Location: Complement (1215124..1213553) in C	CAGTTAAGAATTATAGTGACGTTGTTAATCGAGGTGCTCTGGGTTTAACACAAACTATTG	CAL0002883	orf19.1237	ARO9	orf19.8822|IPF14677.1|IPF12542.2|Contig4-2681_0003|CA2975|orf6.5080|orf6.711|CaO19.1237|CAWG_03266	Ca21chr4_C_albicans_SC5314	Aromatic transaminase of the Ehrlich fusel oil pathway of aromatic alcohol biosynthesis; Rim101p-dependent pH-regulation (alkaline induced); Hap43p-induced gene	CAL0002883	GO:0005737|GO:0030170|GO:0005634|GO:0008793|GO:0000949	GO:0030170=pyridoxal phosphate binding|GO:0008793=aromatic-amino-acid:2-oxoglutarate aminotransferase activity	GO:0005737=cytoplasm|GO:0005634=nucleus	GO:0000949=aromatic amino acid family catabolic process to alcohol via Ehrlich pathway	GO:0008793|GO:0030170|GO:0000949|GO:0005634|GO:0005737
CAL0002885	0.340366	Compromised	-0.340366	Compromised	0	0.368002	Compromised	3.97718	Detected	2.17259	0.358359	4.82555	2.96219	5.92771	57.9	CAL0002885	CAL0002885	CAL0002885 (alignment of 60bp with 100.00% identity) , Description: Predicted ORF in Assemblies 19, 20 and 21; exogenously expressed protein is a substrate for Kex2p processing in vitro; fluconazole-downregulated; possibly spurious ORF (Annotation Workin	ACAGCTACTGGTACAAGTGGTCCAGTTACCTGTAAAAAGAAGAAGAGAAGAAACTACTAA	CAL0002885	orf19.1239		orf19.8824|IPF12540.1|IPF29520.1|Contig4-2139_0003|CA2974|orf6.5078|CaO19.1239|IPF12540|CaO19.8824|CAWG_03264	Ca21chr4_C_albicans_SC5314	Secreted protein; exogenously expressed protein is a substrate for Kex2p processing in vitro; fluconazole-regulated	CAL0002885	GO:0008150|GO:0003674|GO:0005575	GO:0003674=molecular_function	GO:0005575=cellular_component	GO:0008150=biological_process	GO:0003674|GO:0008150|GO:0005575
CAL0003033	0.0971436	Detected	-0.0971436	Detected	0	-2.47331	Detected	-0.768217	Detected	-1.62076	0.199505	3328.69	2862.69	675.322	1762.44	CAL0003033	CAL0003033	CAL0003033 (alignment of 60bp with 100.00% identity) , Description: Predicted ORF in Assemblies 19, 20 and 21; transcription is upregulated in both intermediate and mature biofilms, Location: 228119..229216 in Candida albicans Ca21chr6, Gene: orf19.124	CATGTGAAAACTTCAACTTCTCCAGCAATCCCATTGTTTTATACAAAATCCCTTTCACAA	CAL0003033	orf19.124	CIC1	orf19.7771|IPF27169.1|IPF7046.2|orf6.137|orf6.2607|Contig4-2900_0027|CA0020|CaO19.124|IPF7046|CAWG_05244	Ca21chr6_C_albicans_SC5314	Putative proteasome-interacting protein; transcription is upregulated in both intermediate and mature biofilms	CAL0003033	GO:0030163|GO:0000502|GO:0003735|GO:0003723|GO:0005730|GO:0015934|GO:0042273|GO:0030687|GO:0030674|GO:0006412	GO:0003735=structural constituent of ribosome|GO:0003723=RNA binding|GO:0030674=protein binding, bridging	GO:0000502=proteasome complex|GO:0005730=nucleolus|GO:0015934=large ribosomal subunit|GO:0030687=preribosome, large subunit precursor	GO:0030163=protein catabolic process|GO:0042273=ribosomal large subunit biogenesis|GO:0006412=translation	GO:0003735|GO:0003723|GO:0030674|GO:0030163|GO:0042273|GO:0006412|GO:0000502|GO:0005730|GO:0030687|GO:0015934
CAL0002909	-0.208667	Detected	0.208667	Detected	0	0.948003	Detected	0.706833	Detected	0.827418	0.0753726	3778.09	4964.67	10150.5	6873.95	CAL0002909	CAL0002909	CAL0002909 (alignment of 60bp with 100.00% identity) , Description: Predicted ORF in Assemblies 19, 20 and 21; fungal-specific (no human or murine homolog), Location: 1221392..1229599 in Candida albicans Ca21chr4, Gene: orf19.1240 , :: Next best Hit, CA	GAAAAGTATTTGGATGATGTTGATGGTTCTGATGAAGGTGCTGGTATAGAGGAGAAGTAA	CAL0002909	orf19.1240	YPR117W	orf19.8825|IPF26084.1|IPF9887.3|CA1261|orf6.2676|orf6.5077|CaO19.1240|IPF9887|IPF9887.3eoc|IPF9887.2|CAWG_03263	Ca21chr4_C_albicans_SC5314	Ortholog of S. cerevisiae : YPR117W, C. glabrata CBS138 : CAGL0D04510g, C. parapsilosis CDC317 : CPAR2_500480 and Candida tenuis NRRL Y-1498 : CANTEDRAFT_120679	CAL0002909	GO:0008150|GO:0003674|GO:0005575	GO:0003674=molecular_function	GO:0005575=cellular_component	GO:0008150=biological_process	GO:0003674|GO:0008150|GO:0005575
CAL0002915	0.0376067	Detected	-0.0376067	Detected	0	-0.0539985	Detected	-0.225269	Detected	-0.139634	0.274009	3072.46	2869.67	3474.81	2469.98	CAL0002915	CAL0002915	CAL0002915 (alignment of 60bp with 100.00% identity) , Description: Predicted ORF in Assemblies 19, 20 and 21, Location: 1230716..1233544 in Candida albicans Ca21chr4, Gene: orf19.1244 , :: Next best Hit, CAL0001526 (alignment of 14bp with 100.00% iden	CATATACACAAGGATGGTGCTAACGGTAATCATACTGAGAATTTAATTGAGTTTGAGCAA	CAL0002915	orf19.1244	GYP2	orf19.8829|IPF26053.1|IPF9881.2|Contig4-2415_0004|CA1262|orf6.2680|CaO19.1244|CaO19.8829|MDR1|CAWG_03262	Ca21chr4_C_albicans_SC5314	Ortholog(s) have Rab GTPase activator activity, role in intracellular protein transport and cell division site, cytosol localization	CAL0002915	GO:0032313|GO:0005509|GO:0032153|GO:0006886|GO:0005097|GO:0005829	GO:0005509=calcium ion binding|GO:0005097=Rab GTPase activator activity	GO:0032153=cell division site|GO:0005829=cytosol	GO:0032313=regulation of Rab GTPase activity|GO:0006886=intracellular protein transport	GO:0005509|GO:0005097|GO:0006886|GO:0032313|GO:0005829|GO:0032153
CAL0002917	-0.122986	Detected	0.122986	Detected	0	0.808857	Detected	0.747902	Detected	0.778379	0.0254891	1558.85	1819.01	3583.74	2749.84	CAL0002917	CAL0002917	CAL0002917 (alignment of 60bp with 100.00% identity) , Description: Predicted ORF in Assemblies 19, 20 and 21; greater mRNA abundance observed in a cyr1 homozygous null mutant than in wild type, Location: Complement (1237024..1233893) in Candida albican	CTGTTGCCAGTTTAAGAAGAGATACAGAACCAAAAGATTCATCACCTAAAAAGGAAAAGA	CAL0002917	orf19.1246	SEG1	orf19.8830|IPF15574.3|IPF9880.2|Contig4-2415_0005|Contig4-2415_0007|CA1263|orf6.2682|orf6.3013|CaO19.1246|IPF9880|CAWG_03261	Ca21chr4_C_albicans_SC5314	Predicted ORF in Assemblies 19, 20 and 21; greater mRNA abundance observed in a cyr1 homozygous null mutant than in wild type	CAL0002917	GO:0008150|GO:0003674|GO:0032126|GO:0005840	GO:0003674=molecular_function	GO:0032126=eisosome|GO:0005840=ribosome	GO:0008150=biological_process	GO:0003674|GO:0008150|GO:0005840|GO:0032126
CAL0002918	0.115057	Detected	-0.115057	Detected	0	-0.217556	Detected	-0.152934	Detected	-0.185245	0.261261	1357.02	1138.42	1298.62	1087.06	CAL0002918	CAL0002918	CAL0002918 (alignment of 60bp with 100.00% identity) , Description: Predicted ORF in Assemblies 19, 20 and 21, Location: Complement (1237944..1237483) in Candida albicans Ca21chr4, Gene: orf19.1247 , :: Next best Hit, CAL0002642 (alignment of 15bp with	TTGGGACTAAATAGATTGGCGACATCTCGCTCTTCATTACATTCTAGAAGAAGTTTCAGT	CAL0002918	orf19.1247		orf19.8831|IPF15575.2|IPF18723.2|Contig4-1942_0002|CA1482|orf6.2683|orf6.3012|CaO19.1247|IPF15575|CAWG_03260	Ca21chr4_C_albicans_SC5314	Ortholog of C. parapsilosis CDC317 : CPAR2_500450, Candida tenuis NRRL Y-1498 : CANTEDRAFT_103249, Debaryomyces hansenii CBS767 : DEHA2C07524g and Candida dubliniensis CD36 : CD36_45230	CAL0002918	GO:0008150|GO:0003674|GO:0005575	GO:0003674=molecular_function	GO:0005575=cellular_component	GO:0008150=biological_process	GO:0003674|GO:0008150|GO:0005575
CAL0002919	0.06317	Detected	-0.06317	Detected	0	0.177339	Detected	0.123854	Detected	0.150597	0.159328	10962.9	9882.82	14299.3	11028.9	CAL0002919	CAL0002919	CAL0002919 (alignment of 60bp with 100.00% identity) , Description: Putative protein of unknown function; heterozygous null mutant exhibits resistance to parnafungin in the C. albicans fitness test; predicted ORF in Assemblies 19, 20 and 21, Location: 12	TATGGTAGAACTGAGTATGGCAGAACAGAATATGGTGGTGCTGATGGAGGTCAAACTCCT	CAL0002919	orf19.1248	RPB3	orf19.8832|IPF15576.2|IPF18722.2|Contig4-1942_0004|CA1481|orf6.3011|CaO19.8832|RPB3|CaO19.1248|CAWG_03259	Ca21chr4_C_albicans_SC5314	Putative RNA polymerase II subunit B44; heterozygous null mutant exhibits resistance to parnafungin in the C. albicans fitness test	CAL0002919	GO:0006369|GO:0003968|GO:0003899|GO:0042493|GO:0005665|GO:0046983|GO:0003677|GO:0005829	GO:0003968=RNA-directed RNA polymerase activity|GO:0003899=DNA-directed RNA polymerase activity|GO:0046983=protein dimerization activity|GO:0003677=DNA binding	GO:0005665=DNA-directed RNA polymerase II, core complex|GO:0005829=cytosol	GO:0006369=termination of RNA polymerase II transcription|GO:0042493=response to drug	GO:0046983|GO:0003899|GO:0003677|GO:0003968|GO:0042493|GO:0006369|GO:0005665|GO:0005829
CAL0002920	0.18266	Detected	-0.18266	Detected	0	-0.740783	Detected	-0.674014	Detected	-0.707398	0.0625102	1566.4	1196.52	995.269	834.373	CAL0002920	CAL0002920	CAL0002920 (alignment of 60bp with 100.00% identity) , Description: Predicted ORF in Assemblies 19, 20 and 21, Location: Complement (1240045..1239206) in Candida albicans Ca21chr4, Gene: orf19.1249 , :: Next best Hit, CAL0005687 (alignment of 14bp with	AAATTGGTTAATTTTACTGACTTGGTGGAGTGGAATAAAGCCAACAGCAAGACGAACTAG	CAL0002920	orf19.1249	HIS6	orf19.8833|IPF26083.1|IPF15577.2|Contig4-1942_0005|CA1480|orf6.3010|CaO19.8833|HIS6|CaO19.1249|CAWG_03258	Ca21chr4_C_albicans_SC5314	Ortholog(s) have 1-(5-phosphoribosyl)-5-[(5-phosphoribosylamino)methylideneamino]imidazole-4-carboxamide isomerase activity, role in histidine biosynthetic process and cytosol, nucleus localization	CAL0002920	GO:0003949|GO:0005634|GO:0000105|GO:0005829	GO:0003949=1-(5-phosphoribosyl)-5-[(5-phosphoribosylamino)methylideneamino]imidazole-4-carboxamide isomerase activity	GO:0005634=nucleus|GO:0005829=cytosol	GO:0000105=histidine biosynthetic process	GO:0003949|GO:0000105|GO:0005634|GO:0005829
CAL0003035	-0.0211391	Detected	0.0211391	Detected	0	-0.899332	Detected	-0.867674	Detected	-0.883503	0.000892276	15100	15300	9900	8100	CAL0003035	CAL0003035	NOTE: Has potential for cross hybridization with other orfs; CAL0003035 (alignment 60 bp with 100 % identity) , Description: NADPH oxidoreductase; interacts with phenolic substrates, such as 17beta-estradiol; possible role in response to estrogen; induced	GTTGAACCTCGTGTTACTGGTATTTATGATGTTTCTTTAAAAGATCAACAAGGTCGTAGT	CAL0003035	orf19.125	EBP1	orf19.7772|Contig4-2900_0026|IPF7044.2|IPF29953.1|orf6.2606|CA1216|CaO19.125|CAWG_05243	Ca21chr6_C_albicans_SC5314	NADPH oxidoreductase; interacts with phenolic substrates such as 17beta-estradiol; possible role in estrogen response; induced by oxidative, weak acid stress, nitric oxide, benomyl, GlcNAc; activated by Cap1p, Mnl1p; Sko1p; Hap43p-repressed	CAL0003035	GO:0000324|GO:0009986|GO:0010181|GO:0008144|GO:0042562|GO:0003959|GO:0030446|GO:0005496|GO:0008202|GO:0055114	GO:0010181=FMN binding|GO:0008144=drug binding|GO:0042562=hormone binding|GO:0003959=NADPH dehydrogenase activity|GO:0005496=steroid binding	GO:0000324=fungal-type vacuole|GO:0009986=cell surface|GO:0030446=hyphal cell wall	GO:0008202=steroid metabolic process|GO:0055114=oxidation-reduction process	GO:0008144|GO:0003959|GO:0005496|GO:0003959|GO:0003959|GO:0003959|GO:0003959|GO:0005496|GO:0005496|GO:0003959|GO:0042562|GO:0010181|GO:0008202|GO:0055114|GO:0030446|GO:0000324|GO:0009986
CAL0002944	0.152563	Detected	-0.152563	Detected	0	-1.1464	Detected	-0.491199	Detected	-0.818801	0.151687	5110.35	4069.93	2502.9	3155	CAL0002944	CAL0002944	CAL0002944 (alignment of 60bp with 100.00% identity) , Description: Predicted ORF in Assemblies 19, 20 and 21, Location: 1240249..1241235 in Candida albicans Ca21chr4, Gene: orf19.1250 , :: Next best Hit, CAL0002094 (alignment of 14bp with 100.00% iden	GTTATATCTCAGGGGGAAATAGATAGAGTAAATCGTGGTGGTAAAAAGGGGTTCAGGAAA	CAL0002944	orf19.1250	FAF1	orf19.8834|IPF26082.1|IPF16428.2|CA1479|orf6.3009|CaO19.1250|CaO19.8834|IPF16428|CAWG_03257	Ca21chr4_C_albicans_SC5314	Ortholog(s) have role in maturation of SSU-rRNA from tricistronic rRNA transcript (SSU-rRNA, 5.8S rRNA, LSU-rRNA) and cytoplasm, nucleolus localization	CAL0002944	GO:0000462|GO:0003674|GO:0005737|GO:0005730	GO:0003674=molecular_function	GO:0005737=cytoplasm|GO:0005730=nucleolus	GO:0000462=maturation of SSU-rRNA from tricistronic rRNA transcript (SSU-rRNA, 5.8S rRNA, LSU-rRNA)	GO:0003674|GO:0000462|GO:0005730|GO:0005737
CAL0002947	-0.0657148	Detected	0.0657148	Detected	0	-0.0770178	Detected	0.15798	Detected	0.0404811	0.792029	5652.39	6092.34	6758.51	6366.66	CAL0002947	CAL0002947	CAL0002947 (alignment of 60bp with 100.00% identity) , Description: Predicted ORF in Assemblies 19, 20 and 21; cell-cycle regulated periodic mRNA expression, Location: Complement (1243508..1241271) in Candida albicans Ca21chr4, Gene: orf19.1251 , :: Nex	GCTACATCTTGCCAACGAACATGGATTGGCTATTCAAAGTAATGAAGCTCATAATAATTT	CAL0002947	orf19.1251	BRN1	orf19.8835|IPF26062.1|IPF16426.2|Contig4-2236_0005|CA1478|orf6.3008|CaO19.8835|CaO19.1251|IPF16426|CAWG_03256	Ca21chr4_C_albicans_SC5314	Putative condensin complex subunit; cell-cycle regulated periodic mRNA expression	CAL0002947	GO:0007076|GO:0003674|GO:0006281|GO:0070058|GO:0000799|GO:0032116|GO:0005829	GO:0003674=molecular_function	GO:0000799=nuclear condensin complex|GO:0032116=SMC loading complex|GO:0005829=cytosol	GO:0007076=mitotic chromosome condensation|GO:0006281=DNA repair|GO:0070058=tRNA gene clustering	GO:0003674|GO:0006281|GO:0007076|GO:0070058|GO:0032116|GO:0005829|GO:0000799
CAL0002950	-0.0984259	Detected	0.0984259	Detected	0	0.164565	Detected	-0.0884943	Detected	0.0380354	0.834537	4955.78	5589.3	7166.4	4813.29	CAL0002950	CAL0002950	CAL0002950 (alignment of 60bp with 100.00% identity) , Description: Protein not essential for viability; similar to S. cerevisiae Yme1p, which is a mitochondrial inner membrane protease of the AAA family, Location: 1245692..1247755 in Candida albicans C	AAGTCAAGTAAATCTAGTGAGATAAAAGATATACTCAATGACCCAATGCCAACAGCGTAA	CAL0002950	orf19.1252	YME1	orf19.8836|IPF26065.1|IPF14644.2|Contig4-2236_0003|CA1477|orf6.3007|CaO19.1252|CaO19.8836|CAWG_03255	Ca21chr4_C_albicans_SC5314	Ortholog(s) have ATP-dependent peptidase activity, role in chronological cell aging, misfolded or incompletely synthesized protein catabolic process, mitochondrion organization and i-AAA complex localization	CAL0002950	GO:0031942|GO:0004176|GO:0001300|GO:0006515|GO:0007005|GO:0004222|GO:0005524	GO:0004176=ATP-dependent peptidase activity|GO:0004222=metalloendopeptidase activity|GO:0005524=ATP binding	GO:0031942=i-AAA complex	GO:0001300=chronological cell aging|GO:0006515=misfolded or incompletely synthesized protein catabolic process|GO:0007005=mitochondrion organization	GO:0004222|GO:0005524|GO:0004176|GO:0006515|GO:0007005|GO:0001300|GO:0031942
CAL0002952	-0.101	Detected	0.101	Detected	0	-0.0509367	Detected	-0.310502	Detected	-0.180719	0.386416	1169.96	1324.24	1459.69	975.987	CAL0002952	CAL0002952	CAL0002952 (alignment of 60bp with 100.00% identity) , Description: Predicted ORF in Assemblies 19, 20 and 21; transcriptionally activated by Mnl1p under weak acid stress, Location: 1249554..1251533 in Candida albicans Ca21chr4, Gene: orf19.1253 , :: Ne	GCCTCGAAATATATCACTGCTTTATTGAAAGAAGTTGAGGAGTTGAAAGGAAGGAAGTAA	CAL0002952	orf19.1253	PHO4	orf19.8838|IPF14649.2|IPF10541.2|Contig4-2799_0001|CA3452|orf6.3005|orf6.5720|CaO19.1253|IPF10541|CAWG_03254	Ca21chr4_C_albicans_SC5314	Protein required for growth in medium lacking phosphate and for resistance to copper and Phloxine B; transcriptionally activated by Mnl1p under weak acid stress	CAL0002952	GO:0043565|GO:0071280|GO:0005737|GO:0030447|GO:0045944|GO:0044182|GO:0010922|GO:0005634|GO:0006338|GO:0006796|GO:0045937|GO:0016036	GO:0043565=sequence-specific DNA binding	GO:0005737=cytoplasm|GO:0005634=nucleus	GO:0071280=cellular response to copper ion|GO:0030447=filamentous growth|GO:0045944=positive regulation of transcription from RNA polymerase II promoter|GO:0044182=filamentous growth of a population of unicellular organisms|GO:0010922=positive regulation of phosphatase activity|GO:0006338=chromatin remodeling|GO:0006796=phosphate-containing compound metabolic process|GO:0045937=positive regulatio…	GO:0043565|GO:0006796|GO:0044182|GO:0071280|GO:0010922|GO:0016036|GO:0006338|GO:0045937|GO:0045944|GO:0030447|GO:0005634|GO:0005737
CAL0002954	0.0516744	Detected	-0.0516744	Detected	0	-0.117894	Detected	-0.559379	Detected	-0.338636	0.273837	11899.6	10899.5	12749.9	7514.96	CAL0002954	CAL0002954	CAL0002954 (alignment of 60bp with 100.00% identity) , Description: Transcription is regulated upon yeast-hyphal switch, Location: 1252053..1254341 in Candida albicans Ca21chr4, Gene: orf19.1254 , :: Next best Hit, CAL0004509 (alignment of 16bp with 10	GGAGCTATTGCGTTGACTGATGATGATAGTTTGCAAGTATTTATGAGCCATTTACAAAAA	CAL0002954	orf19.1254	SEC23	orf19.8839|IPF26061.1|IPF10536.2|Contig4-2799_0002|CA3453|orf6.5721|CaO19.8839|sec231|CaO19.1254|CAWG_03253	Ca21chr4_C_albicans_SC5314	Putative GTPase-activating protein; transcription is regulated upon yeast-hyphal switch	CAL0002954	GO:0006888|GO:0030127|GO:0008270|GO:0003400|GO:0006886|GO:0005096	GO:0008270=zinc ion binding|GO:0005096=GTPase activator activity	GO:0030127=COPII vesicle coat	GO:0006888=ER to Golgi vesicle-mediated transport|GO:0003400=regulation of COPII vesicle coating|GO:0006886=intracellular protein transport	GO:0008270|GO:0005096|GO:0006888|GO:0006886|GO:0003400|GO:0030127
CAL0002955	-0.133283	Detected	0.133283	Detected	0	1.07032	Detected	0.362919	Detected	0.716622	0.198435	147	174	408	200	CAL0002955	CAL0002955	NOTE: Has potential for cross hybridization with other orfs; CAL0002955 (alignment 60 bp with 100 % identity) , Description: Putative transcription factor with zinc cluster DNA-binding motif; shows colony morphology-related orf regulation by Ssn6p, Locati	AGCGAAATCGTTTATCACTTACACAACGGTTTGTGTGTCAACATCAATTGTCATCAAATT	CAL0002955	orf19.1255	ZCF5	orf19.8841|orf19.8842|IPF26057.1|IPF26091.1|IPF10533.2|IPF19641.1|Contig4-2799_0004|CA3454|CA3455|orf6.2897|orf6.5722|orf6.5723|orf19.1256|IPF10533.5f|IPF10533.exon1|CAWG_03252	Ca21chr4_C_albicans_SC5314	Putative transcription factor with zinc cluster DNA-binding motif; shows colony morphology-related gene regulation by Ssn6p	CAL0002955	GO:0006355|GO:0003700|GO:1900445|GO:0005634|GO:0008270|GO:0036180|GO:0003677|GO:0006351	GO:0003700=sequence-specific DNA binding transcription factor activity|GO:0008270=zinc ion binding|GO:0003677=DNA binding	GO:0005634=nucleus	GO:0006355=regulation of transcription, DNA-dependent|GO:1900445=positive regulation of filamentous growth of a population of unicellular organisms in response to biotic stimulus|GO:0036180=filamentous growth of a population of unicellular organisms in response to biotic stimulus|GO:0006351=transcription, DNA-dependent	GO:0003700|GO:0003677|GO:0008270|GO:0006355|GO:0006351|GO:0036180|GO:1900445|GO:0005634
CAL0002958	-0.0059638	Detected	0.00596428	Detected	2.38419e-07	-0.0223575	Detected	-0.285644	Detected	-0.154001	0.362998	51.2345	50.8324	61.0447	40.7109	CAL0002958	CAL0002958	CAL0002958 (alignment of 60bp with 100.00% identity) , Description: Predicted ORF in Assemblies 19, 20 and 21, Location: 1262779..1263111 in Candida albicans Ca21chr4, Gene: orf19.1257 , :: Next best Hit, CAL0005060 (alignment of 16bp with 100.00% iden	TTTTTCCGCAATAATTGGGAGCAAGGAGGCGAGGCAAATTCAATCAAATTTGTATACTCC	CAL0002958	orf19.1257		IPF29533.1|orf6.5724|CaO19.1257|CAWG_03251	Ca21chr4_C_albicans_SC5314	Ortholog of Candida albicans WO-1 : CAWG_03251
CAL0002959	0.0691261	Detected	-0.0691266	Detected	-2.38419e-07	-0.0144811	Detected	-0.632945	Detected	-0.323713	0.41442	196.469	175.656	223.432	116.49	CAL0002959	CAL0002959	CAL0002959 (alignment of 60bp with 100.00% identity) , Description: Predicted ORF in Assemblies 19, 20 and 21; regulated by Tsa1p, Tsa1Bp in minimal media at 37 deg; transcription is induced in response to alpha pheromone in SpiderM medium; clade-associa	CATGGTTATGATTATCCAACTGATGCCGATGACAATGATACACTAGATAATCTGGATTTG	CAL0002959	orf19.1258		orf19.8843|IPF15051.2|IPF29522.1|Contig4-2968_0001|CA0066|orf6.402|orf6.5725|CaO19.1258|IPF15051|CAWG_03250	Ca21chr4_C_albicans_SC5314	Putative adhesin-like protein; regulated by Tsa1p, Tsa1Bp in minimal media at 37 deg; transcription is induced in response to alpha pheromone in SpiderM medium; clade-associated gene expression; Hap43p-induced gene	CAL0002959	GO:0008150|GO:0003674|GO:0005575	GO:0003674=molecular_function	GO:0005575=cellular_component	GO:0008150=biological_process	GO:0003674|GO:0008150|GO:0005575
CAL0002960	-0.126878	Detected	0.126878	Detected	0	0.456617	Detected	0.32878	Detected	0.392699	0.109752	3209	3764.83	5794.82	4245	CAL0002960	CAL0002960	CAL0002960 (alignment of 60bp with 100.00% identity) , Description: Predicted ORF in Assemblies 19, 20 and 21, Location: Complement (1269219..1264888) in Candida albicans Ca21chr4, Gene: orf19.1259 , :: Next best Hit, CAL0004816 (alignment of 14bp with	TCACATCGGGTCGAGAGTGTGAGTAGATCTAAAATATCATTAGGCGATATACTTAGTTAG	CAL0002960	orf19.1259	SNT2	orf19.8844|IPF26095.1|IPF19986.1|Contig4-2968_0002|CA3456|orf6.5726|CaO19.1259|SNT2|CaO19.8844|IPF19986|CAWG_03249	Ca21chr4_C_albicans_SC5314	Ortholog(s) have DNA binding activity and Lid2 complex, Snt2C complex, spindle pole body localization	CAL0002960	GO:0048189|GO:0008150|GO:0005816|GO:0008270|GO:0003677|GO:0070211	GO:0008270=zinc ion binding|GO:0003677=DNA binding	GO:0048189=Lid2 complex|GO:0005816=spindle pole body|GO:0070211=Snt2C complex	GO:0008150=biological_process	GO:0008270|GO:0003677|GO:0008150|GO:0070211|GO:0005816|GO:0048189
CAL0002983	0.167781	Detected	-0.167781	Detected	2.38419e-07	-0.554917	Detected	-0.545572	Detected	-0.550245	0.0817947	228.535	178.207	166.886	134.447	CAL0002983	CAL0002983	CAL0002983 (alignment of 60bp with 100.00% identity) , Description: Protein similar to S. cerevisiae Lea1p; transcription is induced in response to alpha pheromone in SpiderM medium, Location: Complement (1270531..1269830) in Candida albicans Ca21chr4,	CAGCCACCAGTATTGAAGAGATTGAAAGAATTGAAAATGACTTAAAAGAAGGAGCTGTCT	CAL0002983	orf19.1260	LEA1	orf19.8845|IPF26087.1|IPF8521.1|Contig4-2968_0003|CA3457|orf6.5727|CaO19.8845|IPF8521|CaO19.1260|CAWG_03248	Ca21chr4_C_albicans_SC5314	Protein similar to S. cerevisiae Lea1p; transcription is induced in response to alpha pheromone in SpiderM medium	CAL0002983	GO:0071004|GO:0003674|GO:0005737|GO:0000398|GO:0005686	GO:0003674=molecular_function	GO:0071004=U2-type prespliceosome|GO:0005737=cytoplasm|GO:0005686=U2 snRNP	GO:0000398=nuclear mRNA splicing, via spliceosome	GO:0003674|GO:0000398|GO:0071004|GO:0005686|GO:0005737
CAL0002988	0.0448651	Detected	-0.0448651	Detected	0	-0.373827	Detected	-0.416119	Detected	-0.394973	0.0154056	972.5	899.219	876.741	681.491	CAL0002988	CAL0002988	CAL0002988 (alignment of 60bp with 100.00% identity) , Description: Predicted ORF in Assemblies 19, 20 and 21, Location: 1282684..1286478 in Candida albicans Ca21chr4, Gene: orf19.1265 , :: Next best Hit, CAL0004398 (alignment of 22bp with 95.45% ident	GAAGAGGATGATGACAGTGATGATATAGATATCGAGTTTATTAACGGACTGGAAACTATT	CAL0002988	orf19.1265	TRS130	orf19.8850|IPF26103.1|IPF14959.2|Contig4-2968_0013|CA3462|orf6.5732|TRS130|CaO19.1265|IPF14959|CAWG_03244	Ca21chr4_C_albicans_SC5314	Ortholog(s) have Rab guanyl-nucleotide exchange factor activity and role in early endosome to Golgi transport, intra-Golgi vesicle-mediated transport, regulation of Rab GTPase activity	CAL0002988	GO:0005802|GO:0017112|GO:0032313|GO:0030008|GO:0034498|GO:0006891|GO:0005769	GO:0017112=Rab guanyl-nucleotide exchange factor activity	GO:0005802=trans-Golgi network|GO:0030008=TRAPP complex|GO:0005769=early endosome	GO:0032313=regulation of Rab GTPase activity|GO:0034498=early endosome to Golgi transport|GO:0006891=intra-Golgi vesicle-mediated transport	GO:0017112|GO:0006891|GO:0032313|GO:0034498|GO:0005802|GO:0005769|GO:0030008
CAL0002989	0.0166192	Detected	-0.0166197	Detected	-2.38419e-07	0.779766	Detected	0.616285	Detected	0.698025	0.013981	34.4151	33.0926	70.3882	50.3046	CAL0002989	CAL0002989	CAL0002989 (alignment of 60bp with 100.00% identity) , Description: Predicted ORF in Assemblies 19, 20 and 21, Location: Complement (1287813..1287448) in Candida albicans Ca21chr4, Gene: orf19.1266 , :: Next best Hit, CAL0000847 (alignment of 15bp with	TTACAAACATTCACCACTCCAATGGTGGATGCGTATTTTCGTGGTAAAATTGAAAGGTGA	CAL0002989	orf19.1266		orf19.8852|IPF10280.1|IPF14956.3|Contig4-1503_0003|CA0944|orf6.5733|CaO19.1266|IPF10280|orf6.2158|CAWG_03243	Ca21chr4_C_albicans_SC5314	Predicted ORF in Assemblies 19, 20 and 21; transcription detected in high-resolution tiling array experiments	CAL0002989	GO:0008150|GO:0003674|GO:0005575	GO:0003674=molecular_function	GO:0005575=cellular_component	GO:0008150=biological_process	GO:0003674|GO:0008150|GO:0005575
CAL0002990	-0.0116553	Detected	0.0116553	Detected	0	0.401187	Detected	0.29886	Detected	0.350024	0.0217447	4384.93	4384.97	7034.96	5245.39	CAL0002990	CAL0002990	CAL0002990 (alignment of 60bp with 100.00% identity) , Description: Predicted ORF in Assemblies 19, 20 and 21, Location: 1288486..1289871 in Candida albicans Ca21chr4, Gene: orf19.1267 , :: Next best Hit, CAL0000871 (alignment of 18bp with 100.00% iden	CAGAGGCTCAAGCCAAGAAATCTTCCAAAAAGCAAAAATCAATGAATAACAAGGAGTTAG	CAL0002990	orf19.1267	CAJ1	orf19.8853|IPF10278.2|IPF29519.1|Contig4-2192_0011|CA0945|orf6.2159|CaO19.1267|DJP2|IPF10278|CaO19.8853|CAWG_03242	Ca21chr4_C_albicans_SC5314	Has domain(s) with predicted heat shock protein binding, unfolded protein binding activity and role in protein folding	CAL0002990	GO:0006457|GO:0031072|GO:0005575|GO:0051082	GO:0031072=heat shock protein binding|GO:0051082=unfolded protein binding	GO:0005575=cellular_component	GO:0006457=protein folding	GO:0051082|GO:0031072|GO:0006457|GO:0005575
CAF0006921	0.161613	Detected	-0.161613	Detected	0	-0.0443864	Detected	-0.0661349	Detected	-0.0552607	0.76549	765.156	601.779	799.39	630.278	CAF0006921	CAF0006921	CAF0006921(alignment 60bp with 100.00% identity) , Description: ORF Predicted by Annotation Working Group, Location: 1290223..1290489 in Candida albicans Ca21chr4, Gene: orf19.1267.1 , :: Next best hit , location within target gene 205-264 , CAL0002807(	ACCATTTCCCAGTTGTACACTTTTGACAAATTGGTGGTTGAACCATTAAAGAAACATCAA	CAF0006921	orf19.1267.1	ISD11	IPF26052.1|IPF10277.2|Contig4-2192_0002|CA0946|IPF10277|CAWG_03241	Ca21chr4_C_albicans_SC5314	Ortholog(s) have enzyme activator activity, role in iron-sulfur cluster assembly and extrinsic to mitochondrial inner membrane, mitochondrial matrix localization	CAF0006921	GO:0016226|GO:0031314|GO:0005759|GO:0008047	GO:0008047=enzyme activator activity	GO:0031314=extrinsic to mitochondrial inner membrane|GO:0005759=mitochondrial matrix	GO:0016226=iron-sulfur cluster assembly	GO:0008047|GO:0008047|GO:0016226|GO:0016226|GO:0005759|GO:0031314|GO:0005759|GO:0031314
CAL0002991	-0.11372	Detected	0.11372	Detected	-2.38419e-07	0.735205	Detected	0.532774	Detected	0.63399	0.0531102	42.0218	48.4093	91.2111	63.4497	CAL0002991	CAL0002991	CAL0002991 (alignment of 60bp with 100.00% identity) , Description: Predicted ORF in Assemblies 19, 20 and 21, Location: 1290702..1291043 in Candida albicans Ca21chr4, Gene: orf19.1268 , :: Next best Hit, CAL0005352 (alignment of 15bp with 100.00% iden	TTTGCCGCCACTTGTTATCAACGTATCAATCATCACAATATGATCCGCGTAAAAGCAAGT	CAL0002991	orf19.1268		orf19.8854|IPF26094.1|IPF29526.1|Contig4-2192_0003|Contig4-2192_0004|orf6.2160|CaO19.8854|CaO19.1268|CAWG_03240	Ca21chr4_C_albicans_SC5314	Predicted ORF in Assemblies 19, 20 and 21; transcription detected in high-resolution tiling array experiments	CAL0002991	GO:0008150|GO:0003674|GO:0005575	GO:0003674=molecular_function	GO:0005575=cellular_component	GO:0008150=biological_process	GO:0003674|GO:0008150|GO:0005575
CAL0003015	-0.172516	Detected	0.172516	Detected	0	1.34277	Detected	0.635041	Detected	0.988905	0.128607	232.981	291.187	802.577	393.332	CAL0003015	CAL0003015	CAL0003015 (alignment of 60bp with 100.00% identity) , Description: Predicted ORF in Assemblies 19, 20 and 21; similar to ferric reductase Fre10p, Location: 1291382..1293565 in Candida albicans Ca21chr4, Gene: orf19.1270 , :: Next best Hit, CAL0002269 (	TGAATTGAGAGTTGCAGTAAAGAAAAACTTGGACAACACTCCGCATAGAGTAGATTTTTT	CAL0003015	orf19.1270	FRE3	orf19.8856|IPF26063.1|IPF10273.2|Contig4-2192_0007|CFL99|CFL3|CA0947|orf6.2162|CaO19.1270|CaO19.8856|CAWG_03239	Ca21chr4_C_albicans_SC5314	Protein with similarity to ferric reductase Fre10p; possibly an essential gene, disruptants not obtained by UAU1 method	CAL0003015	GO:0005506|GO:0050660|GO:0016491|GO:0009055|GO:0016021|GO:0055114	GO:0005506=iron ion binding|GO:0050660=flavin adenine dinucleotide binding|GO:0016491=oxidoreductase activity|GO:0009055=electron carrier activity	GO:0016021=integral to membrane	GO:0055114=oxidation-reduction process	GO:0050660|GO:0005506|GO:0009055|GO:0016491|GO:0055114|GO:0016021
CAL0003017	-0.0831265	Detected	0.0831265	Detected	0	0.279879	Detected	-0.158455	Detected	0.0607119	0.819851	3184.34	3516.04	4935.33	2915.31	CAL0003017	CAL0003017	CAL0003017 (alignment of 60bp with 100.00% identity) , Description: Predicted ORF in Assemblies 19, 20 and 21, Location: Complement (1295087..1293849) in Candida albicans Ca21chr4, Gene: orf19.1272 , :: Next best Hit, CAL0002909 (alignment of 15bp with	GATGCAAAATTACGTGAATCTGAAATAATATGGGAGGGAAATGATAAACTTCCCTGGTTT	CAL0003017	orf19.1272	YGR111W	orf19.8858|IPF26080.1|IPF10270.2|Contig4-2192_0009|CA0948|orf6.2164|IPF10270|CaO19.8858|CaO19.1272|CAWG_03238	Ca21chr4_C_albicans_SC5314	Ortholog(s) have role in regulation of cell size and cytoplasm, nucleus localization	CAL0003017	GO:0008361|GO:0003674|GO:0005737|GO:0005634	GO:0003674=molecular_function	GO:0005737=cytoplasm|GO:0005634=nucleus	GO:0008361=regulation of cell size	GO:0003674|GO:0008361|GO:0005634|GO:0005737
CAL0003018	0.112056	Detected	-0.112056	Detected	0	-0.0918541	Detected	-0.374625	Detected	-0.23324	0.32527	1080	909.802	1129.96	743.462	CAL0003018	CAL0003018	CAL0003018 (alignment of 60bp with 100.00% identity) , Description: Predicted ORF in Assemblies 19, 20 and 21, Location: 1295913..1296305 in Candida albicans Ca21chr4, Gene: orf19.1273 , :: Next best Hit, CAL0005326 (alignment of 17bp with 100.00% iden	GGGTTTGATGAAGAATTGAAGGACTTGAAAGCTCAATTATATGACAAGTTTGGTGACAAT	CAL0003018	orf19.1273	GIM3	orf19.8859|IPF10269.1|IPF29523.1|Contig4-2799_0007|CA0949|orf6.2165|CaO19.1273|GIM3|CaO19.8859|IPF10269	Ca21chr4_C_albicans_SC5314	Ortholog(s) have tubulin binding activity, role in tubulin complex assembly and prefoldin complex localization	CAL0003018	GO:0015631|GO:0007021|GO:0006457|GO:0016272|GO:0051087|GO:0051082	GO:0015631=tubulin binding|GO:0051087=chaperone binding|GO:0051082=unfolded protein binding	GO:0016272=prefoldin complex	GO:0007021=tubulin complex assembly|GO:0006457=protein folding	GO:0051082|GO:0051087|GO:0015631|GO:0006457|GO:0007021|GO:0016272
CAL0003019	0.0309358	Detected	-0.0309358	Detected	0	0.959023	Detected	0.516255	Detected	0.737639	0.0808529	157	148	360	212	CAL0003019	CAL0003019	NOTE: Has potential for cross hybridization with other orfs; CAL0003019 (alignment 60 bp with 100 % identity) , Description: Predicted ORF in Assemblies 19, 20 and 21, Location: Complement (1298544..1296853) in Candida albicans Ca21chr4, Gene: orf19.1274	CACAACGGTTTGTGTGTCAACATCAATTGTCATCAGATCAACCAACTAAAACAATCAATA	CAL0003019	orf19.1274		orf19.8861|IPF10266.2|Contig4-2799_0004|Contig4-1689_0001|orf6.2166|CaO19.1274|CAWG_03236	Ca21chr4_C_albicans_SC5314	Has domain(s) with predicted DNA binding, zinc ion binding activity, role in transcription, DNA-dependent and nucleus localization	CAL0003019	GO:0005634|GO:0008270|GO:0003677|GO:0006351	GO:0008270=zinc ion binding|GO:0003677=DNA binding	GO:0005634=nucleus	GO:0006351=transcription, DNA-dependent	GO:0003677|GO:0008270|GO:0006351|GO:0005634
CAL0003020	-0.254069	Detected	0.254069	Detected	0	1.64078	Detected	1.08598	Detected	1.36338	0.0684064	882.493	1234.99	3954.92	2154.99	CAL0003020	CAL0003020	CAL0003020 (alignment of 60bp with 100.00% identity) , Description: Zinc finger transcriptional regulator of nitrogen utilization; required for nitrogen catabolite repression and utilization of isoleucine, tyrosine and tryptophan N sources; required for	CCAATTCTAGTGGAGTCAATACATCAACTGCTAATAATCAAGATTGGGATTGGTTAAACA	CAL0003020	orf19.1275	GAT1	orf19.8862|orf6.2898|GAT99|IPF26064.1|IPF12290.2|Contig4-2741_0008|CA1410|CaO19.8862|CaO19.1275|CAWG_03234.1	Ca21chr4_C_albicans_SC5314	Zinc finger transcriptional regulator of nitrogen utilization; required for nitrogen catabolite repression and utilization of isoleucine, tyrosine and tryptophan N sources; required for virulence in a mouse systemic infection model	CAL0003020	GO:0043565|GO:0001077|GO:0001076|GO:0003700|GO:0045944|GO:0001080|GO:0009405|GO:0005634|GO:0008270|GO:0006808|GO:0005829	GO:0043565=sequence-specific DNA binding|GO:0001077=RNA polymerase II core promoter proximal region sequence-specific DNA binding transcription factor activity involved in positive regulation of transcription|GO:0001076=RNA polymerase II transcription factor binding transcription factor activity|GO:0003700=sequence-specific DNA binding transcription factor activity|GO:0008270=zinc ion binding	GO:0005634=nucleus|GO:0005829=cytosol	GO:0045944=positive regulation of transcription from RNA polymerase II promoter|GO:0001080=nitrogen catabolite activation of transcription from RNA polymerase II promoter|GO:0009405=pathogenesis|GO:0006808=regulation of nitrogen utilization	GO:0003700|GO:0008270|GO:0001076|GO:0043565|GO:0001077|GO:0009405|GO:0006808|GO:0045944|GO:0001080|GO:0005634|GO:0005829
CAL0003021	0.377077	Detected	-0.377077	Detected	0	0.412221	Detected	0.0384402	Detected	0.225331	0.645928	51.1984	29.8691	63.2204	39.0533	CAL0003021	CAL0003021	CAL0003021 (alignment of 60bp with 100.00% identity) , Description: Predicted ORF in Assemblies 19, 20 and 21; not essential for viability; similar to S. cerevisiae Vhs3p, which is a putative phosphopantothenoylcysteine decarboxylase, Location: 1304540..	CGAGCAATTTGGTATTTACAAGAATTCTTACAAACTTTTGCATCATCTAGCACTCTGGAA	CAL0003021	orf19.1276		orf19.8863|IPF26090.1|IPF12292.2|YOR054|CA6187|orf6.2899|CaO19.1276|CaO19.8863|IPF12292|CAWG_03233	Ca21chr4_C_albicans_SC5314	Predicted ORF in Assemblies 19, 20 and 21; not essential for viability; similar to S. cerevisiae Vhs3p, which is a putative phosphopantothenoylcysteine decarboxylase	CAL0003021	GO:0008430|GO:0045454|GO:0005575	GO:0008430=selenium binding	GO:0005575=cellular_component	GO:0045454=cell redox homeostasis	GO:0008430|GO:0045454|GO:0005575
CAL0003022	0.109011	Detected	-0.109011	Detected	0	-0.581001	Detected	-1.0007	Detected	-0.790852	0.0789643	3064.96	2592.87	2289.45	1369.96	CAL0003022	CAL0003022	CAL0003022 (alignment of 60bp with 100.00% identity) , Description: Predicted ORF in Assemblies 19, 20 and 21; repressed by Rgt1p, Location: Complement (1306454..1305276) in Candida albicans Ca21chr4, Gene: orf19.1277 , :: Next best Hit, CAL0000451 (ali	GTTGTTGCTGAGAATGGATGGGATGACATTGGACCAGAAGCAGTAAACTATCAGTTCTAA	CAL0003022	orf19.1277		orf19.8864|IPF19348.2|IPF11858.2|Contig4-2741_0002|CA1411|orf6.2900|orf6.303|CaO19.1277|IPF11858|CAWG_03232	Ca21chr4_C_albicans_SC5314	Hap43p-repressed gene; repressed by Rgt1p; late-stage biofilm-induced gene	CAL0003022	GO:0008150|GO:0003674|GO:0005575	GO:0003674=molecular_function	GO:0005575=cellular_component	GO:0008150=biological_process	GO:0003674|GO:0008150|GO:0005575
CAL0003024	0.0995555	Detected	-0.0995555	Detected	0	0.554957	Detected	0.458668	Detected	0.506813	0.0444594	3487.56	2989.3	5762.77	4314.85	CAL0003024	CAL0003024	CAL0003024 (alignment of 60bp with 100.00% identity) , Description: Protein similar to S. cerevisiae Cds1p; transposon mutation affects filamentous growth, Location: 913853..915208 in Candida albicans Ca21chr5, Gene: orf19.1279 , :: Next best Hit, CAL00	GAGTTTGTTGAAATATTTGAACCGTGAAGAAGTACTTACTTCTGAACAATTGCTGCGTAT	CAL0003024	orf19.1279	CDS1	orf19.8866|IPF26045.1|IPF16312.2|Contig4-2808_0002|CA0213|orf6.874|CaO19.8866|CaO19.1279|CAWG_04783	Ca21chr5_C_albicans_SC5314	Protein similar to S. cerevisiae Cds1p; transposon mutation affects filamentous growth	CAL0003024	GO:0030447|GO:0016020|GO:0005783|GO:0036170|GO:0004605|GO:0071216|GO:0036180|GO:0009267	GO:0004605=phosphatidate cytidylyltransferase activity	GO:0016020=membrane|GO:0005783=endoplasmic reticulum	GO:0030447=filamentous growth|GO:0036170=filamentous growth of a population of unicellular organisms in response to starvation|GO:0071216=cellular response to biotic stimulus|GO:0036180=filamentous growth of a population of unicellular organisms in response to biotic stimulus|GO:0009267=cellular response to starvation	GO:0004605|GO:0030447|GO:0009267|GO:0036170|GO:0036180|GO:0071216|GO:0016020|GO:0005783
CAL0003056	0.0854454	Detected	-0.0854454	Detected	0	-0.437106	Detected	0.0243702	Detected	-0.206368	0.489897	7073.3	6182.53	5933.89	6539.99	CAL0003056	CAL0003056	CAL0003056 (alignment of 60bp with 100.00% identity) , Description: Putative translation initiation factor; flucytosine induced; orfs encoding ribosomal subunits, translation factors, and tRNA synthetases are downregulated upon phagocytosis by murine mac	CCAACAACGTAATGGTAGAAAAACTTTAACCACAGTTCAAGGTGTTCCAAATGAATATGA	CAL0003056	orf19.1280	SUI1	orf19.8867|IPF10374.1|IPF29514.1|Contig4-2808_0003|CA2367|orf6.4245|CaO19.8867|CaO19.1280|CAWG_04782	Ca21chr5_C_albicans_SC5314	Putative translation initiation factor; flucytosine induced; genes encoding ribosomal subunits, translation factors, and tRNA synthetases are downregulated upon phagocytosis by murine macrophage	CAL0003056	GO:0003743|GO:0005634|GO:0006413|GO:0005829|GO:0043614	GO:0003743=translation initiation factor activity	GO:0005634=nucleus|GO:0005829=cytosol|GO:0043614=multi-eIF complex	GO:0006413=translational initiation	GO:0003743|GO:0006413|GO:0043614|GO:0005634|GO:0005829
CAL0003058	0.0503855	Detected	-0.0503855	Detected	0	0.0567551	Detected	0.096736	Detected	0.0767455	0.292495	4291.83	3938.17	5194.94	4275	CAL0003058	CAL0003058	CAL0003058 (alignment of 60bp with 100.00% identity) , Description: Predicted ORF in Assemblies 19, 20 and 21, Location: Complement (911547..910882) in Candida albicans Ca21chr5, Gene: orf19.1281 , :: Next best Hit, CAL0001245 (alignment of 18bp with 9	GAGAGAAGTCGAAAGCATAATTCCTCACATACTCGTCACAAAGATGGATCACCCCACAGA	CAL0003058	orf19.1281	CWC25	orf19.8868|IPF26047.1|IPF10373.1|Contig4-2808_0006|CA2366|orf6.4244|CaO19.1281|CWC25|CaO19.8868|IPF10373|CAWG_04781	Ca21chr5_C_albicans_SC5314	Ortholog(s) have role in nuclear mRNA splicing, via spliceosome and U2-type spliceosomal complex localization	CAL0003058	GO:0003674|GO:0000398|GO:0005684	GO:0003674=molecular_function	GO:0005684=U2-type spliceosomal complex	GO:0000398=nuclear mRNA splicing, via spliceosome	GO:0003674|GO:0000398|GO:0005684
CAL0003060	-0.00877428	Detected	0.00877428	Detected	0	-0.192486	Detected	0.0174241	Detected	-0.0875311	0.493344	5132.35	5111.94	5445.45	5041.31	CAL0003060	CAL0003060	CAL0003060 (alignment of 60bp with 100.00% identity) , Description: Predicted ORF in Assemblies 19, 20 and 21, Location: Complement (909921..909613) in Candida albicans Ca21chr5, Gene: orf19.1282 , :: Next best Hit, CAL0003119 (alignment of 14bp with 1	GAAACTCATGCTCCAGAGCCTCATATATTATTATTCAAGAGACCCTTAAATCCCGGGCAA	CAL0003060	orf19.1282	CKS1	orf19.8869|IPF26050.1|IPF10371.2|Contig4-2808_0007|CA2365|orf6.4243|CaO19.8869|CaO19.1282|CAWG_04780	Ca21chr5_C_albicans_SC5314	Ortholog(s) have histone binding, protein kinase activator activity, ubiquitin binding activity	CAL0003060	GO:0043130|GO:0005634|GO:0030295|GO:0000079|GO:0006351|GO:0005829|GO:0042393|GO:0007346|GO:0007049|GO:0000307|GO:0016538|GO:0006338|GO:0045893	GO:0043130=ubiquitin binding|GO:0030295=protein kinase activator activity|GO:0042393=histone binding|GO:0016538=cyclin-dependent protein kinase regulator activity	GO:0005634=nucleus|GO:0005829=cytosol|GO:0000307=cyclin-dependent protein kinase holoenzyme complex	GO:0000079=regulation of cyclin-dependent protein kinase activity|GO:0006351=transcription, DNA-dependent|GO:0007346=regulation of mitotic cell cycle|GO:0007049=cell cycle|GO:0006338=chromatin remodeling|GO:0045893=positive regulation of transcription, DNA-dependent	GO:0016538|GO:0042393|GO:0043130|GO:0030295|GO:0007049|GO:0007346|GO:0006338|GO:0006351|GO:0000079|GO:0045893|GO:0000307|GO:0005634|GO:0005829
CAL0003061	-0.0440693	Detected	0.0440693	Detected	0	0.292707	Detected	-0.164838	Detected	0.0639348	0.809507	1419.95	1485.23	2161.1	1259.68	CAL0003061	CAL0003061	CAL0003061 (alignment of 60bp with 100.00% identity) , Description: Protein described as cell cycle checkpoint protein; RNA abundance regulated by tyrosol and cell density, Location: Complement (909145..902168) in Candida albicans Ca21chr5, Gene: orf19.	GAAGCTACATCATTAGAGAGATTATCACAAATGTATGCAGGTTGGGCAGCTTATATGTAG	CAL0003061	orf19.1283	MEC1	orf19.8870|IPF19757.1|IPF29511.1|Contig4-2808_0008|Contig4-2808_0009|Contig4-2808_0011|CA2364|orf6.4242|CaO19.1283|CAWG_04779.1	Ca21chr5_C_albicans_SC5314	Cell cycle checkpoint protein with a role in genome integrity; RNA abundance regulated by tyrosol and cell density	CAL0003061	GO:0005739|GO:0006260|GO:0051276|GO:0004674|GO:0031573|GO:0016572|GO:0000722|GO:0000228|GO:0005829|GO:0007131|GO:0006975	GO:0004674=protein serine/threonine kinase activity	GO:0005739=mitochondrion|GO:0000228=nuclear chromosome|GO:0005829=cytosol	GO:0006260=DNA replication|GO:0051276=chromosome organization|GO:0031573=intra-S DNA damage checkpoint|GO:0016572=histone phosphorylation|GO:0000722=telomere maintenance via recombination|GO:0007131=reciprocal meiotic recombination|GO:0006975=DNA damage induced protein phosphorylation	GO:0004674|GO:0051276|GO:0000722|GO:0006975|GO:0006260|GO:0031573|GO:0007131|GO:0016572|GO:0000228|GO:0005829|GO:0005739
CAL0003062	-0.0442939	Detected	0.0442939	Detected	0	0.949419	Detected	0.563241	Detected	0.75633	0.0622669	1509.97	1579.87	3623.47	2219.19	CAL0003062	CAL0003062	CAL0003062 (alignment of 60bp with 100.00% identity) , Description: Predicted ORF in Assemblies 19, 20 and 21, Location: 899327..902122 in Candida albicans Ca21chr5, Gene: orf19.1285 , :: Next best Hit, CAL0120843 (alignment of 19bp with 94.74% identit	CCGCCACCAAAATCTCCATTACTACATGCACATTCTCCAAATCAAGATATAAAAGATTTA	CAL0003062	orf19.1285	NVJ2	orf19.8872|IPF26042.1|IPF10590.2|CA2363|orf6.4240|CaO19.1285|CaO19.8872|IPF10590|CAWG_04777	Ca21chr5_C_albicans_SC5314	Plasma membrane-localized protein of unknown function; Hap43p-repressed gene	CAL0003062	GO:0008150|GO:0005886|GO:0005783|GO:0005840|GO:0071561|GO:0008289	GO:0008289=lipid binding	GO:0005886=plasma membrane|GO:0005783=endoplasmic reticulum|GO:0005840=ribosome|GO:0071561=nucleus-vacuole junction	GO:0008150=biological_process	GO:0008289|GO:0008150|GO:0005886|GO:0005840|GO:0005783|GO:0071561
CAL0003063	0.272999	Detected	-0.273	Detected	-2.38419e-07	-1.92958	Compromised	-0.0266414	Detected	-0.978112	0.427246	28.7106	19.3494	7.51658	22.5	CAL0003063	CAL0003063	CAL0003063 (alignment of 60bp with 100.00% identity) , Description: Predicted ORF in Assemblies 19, 20 and 21, Location: Complement (896840..896484) in Candida albicans Ca21chr5, Gene: orf19.1286 , :: Next best Hit, CAL0002121 (alignment of 13bp with 1	CTGTCATTCCTTCATTCCTATGCAATCAAAGTGAGATCATCATGTCTTTGGTAAAATATG	CAL0003063	orf19.1286		orf19.8873|IPF26049.1|IPF29513.1|orf6.4239|CaO19.8873|CaO19.1286|CAWG_04776	Ca21chr5_C_albicans_SC5314	Ortholog of Candida albicans WO-1 : CAWG_04776
CAL0003064	0.180399	Detected	-0.180399	Detected	0	-0.71584	Detected	0.23637	Detected	-0.239735	0.684097	537.996	412.245	348.342	539.472	CAL0003064	CAL0003064	CAL0003064 (alignment of 60bp with 100.00% identity) , Description: Predicted ORF in Assemblies 19, 20 and 21; possibly spurious ORF (Annotation Working Group prediction), Location: 891567..892709 in Candida albicans Ca21chr5, Gene: orf19.1287 , :: Next	ACTGGTAATGCTAGTGAGATGATTAGTGCTGGTAACTTTATGCTCACCGATTTCTACTTA	CAL0003064	orf19.1287		orf19.8874|IPF26046.1|IPF10595.1|CA2362|orf6.4238|CaO19.8874|CaO19.1287|IPF10595|CAWG_04775	Ca21chr5_C_albicans_SC5314	Biofilm-induced gene	CAL0003064	GO:0008150|GO:0003674|GO:0005575	GO:0003674=molecular_function	GO:0005575=cellular_component	GO:0008150=biological_process	GO:0003674|GO:0008150|GO:0005575
CAL0003065	-0.290358	Detected	0.290358	Detected	0	2.04701	Detected	1.71215	Detected	1.87958	0.0303586	8421.62	12393.5	51290.2	32550	CAL0003065	CAL0003065	CAL0003065 (alignment of 60bp with 100.00% identity) , Description: Predicted 3-hydroxyacyl-CoA epimerase, required for fatty acid beta-oxidation; upregulated upon phagocytosis; transcription is regulated by Mig1p and by white-opaque switching; transcrip	CTGTTGTTTTCCAAACTCATGTTGTTGATAGAGGTACTATTGCTATTAACAATGCTGCTA	CAL0003065	orf19.1288	FOX2	IPF9601.2|IPF19113.1|IPF18935.1|Contig4-2784_0005|CA0347|orf6.882|orf6.1167|orf19.3070.1|orf19.1809|CAWG_02418	Ca21chr3_C_albicans_SC5314	3-hydroxyacyl-CoA epimerase, required for fatty acid beta-oxidation; upregulated upon phagocytosis; transcription regulated by Mig1p, by white-opaque switching and by DNA methylation; transcriptional activation by oleate requires Ctf1p	CAL0003065	GO:0006635|GO:0000166|GO:0009405|GO:0003857|GO:0005575|GO:0004300|GO:0006097|GO:0009062	GO:0000166=nucleotide binding|GO:0003857=3-hydroxyacyl-CoA dehydrogenase activity|GO:0004300=enoyl-CoA hydratase activity	GO:0005575=cellular_component	GO:0006635=fatty acid beta-oxidation|GO:0009405=pathogenesis|GO:0006097=glyoxylate cycle|GO:0009062=fatty acid catabolic process	GO:0000166|GO:0003857|GO:0004300|GO:0009405|GO:0009062|GO:0006097|GO:0006635|GO:0005575
CAL0003066	-0.0630727	Detected	0.0630727	Detected	0	0.535755	Detected	0.337602	Detected	0.436678	0.0653303	4254.32	4568.68	7764.53	5417.33	CAL0003066	CAL0003066	CAL0003066 (alignment of 60bp with 100.00% identity) , Description: Putative glycerol-3-phosphate O-acyltransferase; fungal-specific (no human or murine homolog), Location: 162858..165170 in Candida albicans Ca21chr3, Gene: orf19.1289 , :: Next best Hit	CCCTCATTTACCTGAAACATCATCTTCAGATCATATGGAATTGAATTTTGCTTCAAAACC	CAL0003066	orf19.1289	SCT1	IPF9596.1|IPF18377.2|Contig4-2784_0001|CA0214|orf6.883|orf6.5315|CaO19.1289|orf19.6154|SCT11|CAWG_02419	Ca21chr3_C_albicans_SC5314	Putative glycerol-3-phosphate O-acyltransferase; fungal-specific (no human or murine homolog)	CAL0003066	GO:0005783|GO:0004366|GO:0008654|GO:0016287|GO:0043231	GO:0004366=glycerol-3-phosphate O-acyltransferase activity|GO:0016287=glycerone-phosphate O-acyltransferase activity	GO:0005783=endoplasmic reticulum|GO:0043231=intracellular membrane-bounded organelle	GO:0008654=phospholipid biosynthetic process	GO:0004366|GO:0016287|GO:0008654|GO:0043231|GO:0005783
CAL0003100	-0.245853	Detected	0.245853	Detected	0	1.43974	Detected	1.17538	Detected	1.30756	0.0426761	2497.94	3456.11	9683.14	6452.92	CAL0003100	CAL0003100	CAL0003100 (alignment of 60bp with 100.00% identity) , Description: Predicted ORF in Assemblies 19, 20 and 21; increased expression in response to prostaglandins, Location: 1154756..1156606 in Candida albicans Ca21chr4, Gene: orf19.1290 , :: Next best H	GGGAAGAGTATTTCACTGGTGTTGGAATGTTAGCAAAAATGGAAGAAACATTGTTAAAAC	CAL0003100	orf19.1290	XKS1	orf19.9354|IPF25535.1|IPF25530.1|IPF10471.2|IPF10472.2|IPF19103.2|Contig4-2660_0006|CA0341|orf6.909|orf6.1156|orf19.1788|CAWG_03284	Ca21chr4_C_albicans_SC5314	Putative xylulokinase; Hap43p-repressed gene; increased expression in response to prostaglandins	CAL0003100	GO:0005998|GO:0004856|GO:0005634|GO:0005829	GO:0004856=xylulokinase activity	GO:0005634=nucleus|GO:0005829=cytosol	GO:0005998=xylulose catabolic process	GO:0004856|GO:0005998|GO:0005634|GO:0005829
CAL0003102	0.0388889	Detected	-0.0388889	Detected	0	-0.298741	Detected	-0.603205	Detected	-0.450973	0.102975	3633.15	3387.32	3464.71	2245.61	CAL0003102	CAL0003102	CAL0003102 (alignment of 60bp with 100.00% identity) , Description: Protein not essential for viability; similar to S. cerevisiae Abz1p, which is para-aminobenzoate (PABA) synthase; reports differ on whether a murine homolog exists, Location: 1151753..11	GTGGATGATGAATGGGATGAAATGATGTTAAAGTTGACTAGTGCATTACAAGCATTCAAA	CAL0003102	orf19.1291	ABZ1	orf19.9352|orf19.9353|IPF10474.2|Contig4-2660_0010|Contig4-2660_0012|CA0220|orf6.1155|orf6.910|orf6.1154|CaO19.1291|orf19.1786|orf19.1787|CAWG_03285	Ca21chr4_C_albicans_SC5314	Ortholog(s) have 4-amino-4-deoxychorismate synthase activity, role in para-aminobenzoic acid biosynthetic process and cytosol, nucleus localization	CAL0003102	GO:0008153|GO:0004049|GO:0005634|GO:0046820|GO:0005829	GO:0004049=anthranilate synthase activity|GO:0046820=4-amino-4-deoxychorismate synthase activity	GO:0005634=nucleus|GO:0005829=cytosol	GO:0008153=para-aminobenzoic acid biosynthetic process	GO:0004049|GO:0046820|GO:0008153|GO:0005634|GO:0005829
CAL0003105	0.0974727	Detected	-0.0974727	Detected	0	-0.794873	Detected	-0.939645	Detected	-0.867259	0.0190404	13764.1	11831.8	8936.08	6469.73	CAL0003105	CAL0003105	CAL0003105 (alignment of 60bp with 100.00% identity) , Description: Putative tRNA-Val synthetase; orfs encoding ribosomal subunits, translation factors, and tRNA synthetases are downregulated upon phagocytosis by murine macrophage, Location: Complement (	AGCCATTGGACCTGAATGTACTGTTCATGTATTAGTTAAAGGACAAATTGATTTAGATGC	CAL0003105	orf19.1295	VAS1	orf19.8875|IPF26041.1|IPF13980.2|Contig4-1984_0003|CA0223|orf6.295|orf6.921|CaO19.1295|CAWG_04398	Ca21chr2_C_albicans_SC5314	Putative tRNA-Val synthetase; genes encoding ribosomal subunits, translation factors, and tRNA synthetases are downregulated upon phagocytosis by murine macrophage	CAL0003105	GO:0005739|GO:0004832|GO:0006438|GO:0005524|GO:0005829	GO:0004832=valine-tRNA ligase activity|GO:0005524=ATP binding	GO:0005739=mitochondrion|GO:0005829=cytosol	GO:0006438=valyl-tRNA aminoacylation	GO:0005524|GO:0004832|GO:0006438|GO:0005829|GO:0005739
CAL0003106	0.117656	Detected	-0.117656	Detected	0	-0.450434	Detected	-0.277502	Detected	-0.363968	0.130226	187.157	156.443	152.13	137.275	CAL0003106	CAL0003106	CAL0003106 (alignment of 60bp with 100.00% identity) , Description: Predicted ORF in Assemblies 19, 20 and 21, Location: Complement (1356380..1354671) in Candida albicans Ca21chr2, Gene: orf19.1296 , :: Next best Hit, CAL0000464 (alignment of 16bp with	CAGCAAGAATCGATTCATCGAAATCTAATCCAAATGGTGAATTAGGCGAAACTTATAAAC	CAL0003106	orf19.1296	PRP31	orf19.8876|IPF26039.1|IPF13982.2|CA0224|orf6.922|CaO19.8876|PRP31|orf19.82|CaO19.1296|CAWG_04399	Ca21chr2_C_albicans_SC5314	Ortholog(s) have role in spliceosomal snRNP assembly and U4/U6 x U5 tri-snRNP complex, mitochondrion localization	CAL0003106	GO:0005739|GO:0003674|GO:0046540|GO:0000387	GO:0003674=molecular_function	GO:0005739=mitochondrion|GO:0046540=U4/U6 x U5 tri-snRNP complex	GO:0000387=spliceosomal snRNP assembly	GO:0003674|GO:0000387|GO:0005739|GO:0046540
CAL0003107	-0.107037	Detected	0.107037	Detected	-2.38419e-07	0.572002	Detected	0.715873	Detected	0.643938	0.0378469	253.44	289.272	488.999	432.451	CAL0003107	CAL0003107	CAL0003107 (alignment of 60bp with 100.00% identity) , Description: Predicted ORF in Assemblies 19, 20 and 21, Location: 807452..809647 in Candida albicans Ca21chr4, Gene: orf19.1297 , :: Next best Hit, CAL0005595 (alignment of 20bp with 100.00% identi	CTTCGTCTTCATCTTCTTCATCATCGAAATTCAAATTCCCTAGTTTCAAGAAAATCACTC	CAL0003107	orf19.1297	ATG20	orf19.12503|orf19.8877|IPF26018.1|IPF16024.1|IPF22191.1|IPF17055.1|Contig4-2781_0024|orf6.3313|CA0226|orf6.924|CaO19.8877|ATG20|CaO19.1297|CA1692|orf19.5036|IPF16024|CAWG_03432.1	Ca21chr4_C_albicans_SC5314	Ortholog(s) have phosphatidylinositol-3-phosphate binding activity and role in CVT pathway, early endosome to Golgi transport, macroautophagy, mitochondrion degradation	CAL0003107	GO:0000422|GO:0034498|GO:0016236|GO:0000407|GO:0032266|GO:0032258|GO:0019898|GO:0005768	GO:0032266=phosphatidylinositol-3-phosphate binding	GO:0000407=pre-autophagosomal structure|GO:0019898=extrinsic to membrane|GO:0005768=endosome	GO:0000422=mitochondrion degradation|GO:0034498=early endosome to Golgi transport|GO:0016236=macroautophagy|GO:0032258=CVT pathway	GO:0032266|GO:0032258|GO:0034498|GO:0000422|GO:0016236|GO:0005768|GO:0019898|GO:0000407
CAL0003108	-0.107619	Detected	0.107619	Detected	0	-0.269138	Detected	-0.121658	Detected	-0.195398	0.272901	2208.74	2523.05	2379.82	2109.89	CAL0003108	CAL0003108	CAL0003108 (alignment of 60bp with 100.00% identity) , Description: Predicted ORF in Assemblies 19, 20 and 21, Location: Complement (806316..803782) in Candida albicans Ca21chr4, Gene: orf19.1298 , :: Next best Hit, CAL0001665 (alignment of 14bp with 1	TGTGAACAAGGTATTACCGGTATATTTAGTGGTACTACAAAGACGACTGAAAGTATATAG	CAL0003108	orf19.1298	NUP84	orf19.8878|IPF26014.1|IPF16027.3|Contig4-2781_0019|Contig4-2781_0020|Contig4-2781_0021|CA0225|orf6.1389|orf6.923|CaO19.1298|IPF16027.2|CAWG_03433	Ca21chr4_C_albicans_SC5314	Ortholog(s) have structural constituent of nuclear pore activity	CAL0003108	GO:0031965|GO:0000973|GO:0030466|GO:0031990|GO:0006606|GO:0035392|GO:0006302|GO:0005829|GO:0034398|GO:0016973|GO:0031081|GO:0045944|GO:0031080|GO:0017056	GO:0017056=structural constituent of nuclear pore	GO:0031965=nuclear membrane|GO:0005829=cytosol|GO:0031080=Nup107-160 complex	GO:0000973=posttranscriptional tethering of RNA polymerase II gene DNA at nuclear periphery|GO:0030466=chromatin silencing at silent mating-type cassette|GO:0031990=mRNA export from nucleus in response to heat stress|GO:0006606=protein import into nucleus|GO:0035392=maintenance of chromatin silencing at telomere|GO:0006302=double-strand break repair|GO:0034398=telomere tethering at nuclear periph…	GO:0017056|GO:0031081|GO:0035392|GO:0030466|GO:0034398|GO:0031990|GO:0016973|GO:0006302|GO:0045944|GO:0006606|GO:0000973|GO:0031965|GO:0005829|GO:0031080
CAL0003109	0.12973	Detected	-0.12973	Detected	0	-0.244758	Detected	-0.127142	Detected	-0.18595	0.321703	6878.95	5654.62	6394.56	5553.11	CAL0003109	CAL0003109	CAL0003109 (alignment of 60bp with 100.00% identity) , Description: Predicted ORF in Assemblies 19, 20 and 21; regulated by Gcn2p and Gcn4p, Location: 802437..803744 in Candida albicans Ca21chr4, Gene: orf19.1299 , :: Next best Hit, CAL0005010 (alignmen	GGTAATGGATGGTTAATTATTTATGATGAACCAAGAAAAGACGCTGCTTATGAAGCTTCT	CAL0003109	orf19.1299	RPN6	orf19.8879|IPF13551.2|IPF29495.1|Contig4-2781_0018|CA0454|orf6.1388|CaO19.1299|CAWG_03434	Ca21chr4_C_albicans_SC5314	Putative 26S proteasome subunit; Hap43p-induced gene; regulated by Gcn2p and Gcn4p	CAL0003109	GO:0043248|GO:0006511|GO:0005198|GO:0008541|GO:0005634|GO:0034515	GO:0005198=structural molecule activity	GO:0008541=proteasome regulatory particle, lid subcomplex|GO:0005634=nucleus|GO:0034515=proteasome storage granule	GO:0043248=proteasome assembly|GO:0006511=ubiquitin-dependent protein catabolic process	GO:0005198|GO:0043248|GO:0006511|GO:0005634|GO:0008541|GO:0034515
CAL0003067	-0.088583	Detected	0.0885825	Detected	-2.38419e-07	0.804907	Detected	0.392725	Detected	0.598816	0.116346	146.499	162.988	327.962	197.271	CAL0003067	CAL0003067	CAL0003067 (alignment of 60bp with 100.00% identity) , Description: Predicted ORF in Assemblies 19, 20 and 21, Location: Complement (236909..232296) in Candida albicans Ca21chr6, Gene: orf19.130 , :: Next best Hit, CAL0004149 (alignment of 17bp with 10	CCTTGAGTGGTAATGATGATATTAGTATTTGGGAATTACCAAGTTTAGAATGTAAGGCGA	CAL0003067	orf19.130	VPS15	orf19.7773|orf19.7775|orf19.7776|IPF7041.2|IPF27168.1|IPF7035.2|IPF19493.2|IPF29955.1|IPF7038.2|IPF29948.1|orf6.10|orf6.2603|orf6.2602|orf6.2605|Contig4-2900_0020|Contig4-2900_0021|Contig4-2900_0023|CA1215|CA1214|CA1213|orf19.126|orf19.127|orf19.129|VPS15.5f|CAWG_05242	Ca21chr6_C_albicans_SC5314	Ortholog(s) have protein serine/threonine kinase activity, ubiquitin binding activity	CAL0003067	GO:0000011|GO:0043130|GO:0016236|GO:0005524|GO:0005739|GO:0045324|GO:0004674|GO:0045053|GO:0042147|GO:0006623|GO:0006468|GO:0004713|GO:0034271|GO:0030242|GO:0034272|GO:0048017	GO:0043130=ubiquitin binding|GO:0005524=ATP binding|GO:0004674=protein serine/threonine kinase activity|GO:0004713=protein tyrosine kinase activity	GO:0005739=mitochondrion|GO:0034271=phosphatidylinositol 3-kinase complex I|GO:0034272=phosphatidylinositol 3-kinase complex II	GO:0000011=vacuole inheritance|GO:0016236=macroautophagy|GO:0045324=late endosome to vacuole transport|GO:0045053=protein retention in Golgi apparatus|GO:0042147=retrograde transport, endosome to Golgi|GO:0006623=protein targeting to vacuole|GO:0006468=protein phosphorylation|GO:0030242=peroxisome degradation|GO:0048017=inositol lipid-mediated signaling	GO:0005524|GO:0004713|GO:0043130|GO:0004674|GO:0048017|GO:0030242|GO:0006468|GO:0042147|GO:0045324|GO:0045053|GO:0006623|GO:0000011|GO:0016236|GO:0034272|GO:0034271|GO:0005739
CAL0003697	-0.0117044	Detected	0.0117044	Detected	0	-0.364855	Detected	-0.251024	Detected	-0.30794	0.03381	1944.84	1944.99	1834.83	1589.21	CAL0003697	CAL0003697	CAL0003697 (alignment of 60bp with 100.00% identity) , Description: Predicted ORF in Assemblies 19, 20 and 21, Location: Complement (802162..800828) in Candida albicans Ca21chr4, Gene: orf19.1300 , :: Next best Hit, CAL0002069 (alignment of 21bp with 9	CAACTTGGATGGTGGTTGTTAAAAAACCAGAAGATCCAATTAATCCTGATGAAAAACCAT	CAL0003697	orf19.1300	OMS1	orf19.8880|IPF13552.2|IPF29494.1|Contig4-2781_0017|CA0453|orf6.1387|CaO19.1300|IPF13552|CAWG_03435	Ca21chr4_C_albicans_SC5314	Putative mitochondrial membrane protein; homozygous transposon insertion causes decreased colony wrinkling under filamentous growth-inducing conditions, but does not block true hyphal formation in liquid media	CAL0003697	GO:0003674|GO:0030447|GO:0005740	GO:0003674=molecular_function	GO:0005740=mitochondrial envelope	GO:0030447=filamentous growth	GO:0003674|GO:0030447|GO:0005740
CAL0003699	-0.115407	Detected	0.115407	Detected	0	-0.584988	Detected	-0.521	Compromised	-0.552994	0.0438396	24.3006	28.0599	21.1485	17.6955	CAL0003699	CAL0003699	CAL0003699 (alignment of 60bp with 100.00% identity) , Description: Predicted ORF in Assemblies 19, 20 and 21, Location: 800217..800711 in Candida albicans Ca21chr4, Gene: orf19.1301 , :: Next best Hit, CAL0000676 (alignment of 20bp with 100.00% identi	TTGATTCGTCGAAATCTTATTAGTGAACAAGATAAATTACAAGAAAAAACTAAATTAATG	CAL0003699	orf19.1301	TMA17	orf19.8881|IPF13554.1|IPF18704.2|Contig4-2781_0016|CA0452|orf6.1386|IPF13554|CaO19.1301|CAWG_03436	Ca21chr4_C_albicans_SC5314	Ortholog(s) have cytoplasm, nucleus, ribosome localization	CAL0003699	GO:0008150|GO:0003674|GO:0005737|GO:0005840|GO:0005634	GO:0003674=molecular_function	GO:0005737=cytoplasm|GO:0005840=ribosome|GO:0005634=nucleus	GO:0008150=biological_process	GO:0003674|GO:0008150|GO:0005840|GO:0005634|GO:0005737
CAL0003700	0.0493474	Detected	-0.0493474	Detected	0	-1.08686	Detected	-0.300732	Detected	-0.693795	0.221986	51.8	47.6	28.4	39.2	CAL0003700	CAL0003700	NOTE: Has potential for cross hybridization with other orfs; CAL0003700 (alignment 60 bp with 100 % identity) , Description: Predicted ORF in Assemblies 19, 20 and 21, Location: 798828..799478 in Candida albicans Ca21chr4, Gene: orf19.1302 , :: Next best	AGCAACAACAACAACACCTGCAGCAGGAGCAGTATACAAAGAAAATGTGTGTATATTTAA	CAL0003700	orf19.1302		orf19.8882|IPF13556.2|IPF29496.1|Contig4-2781_0010|CA0451|orf6.1385|orf6.2778|CaO19.1302|IPF13556|CAWG_03437	Ca21chr4_C_albicans_SC5314	Ortholog of Candida dubliniensis CD36 : CD36_43500, Spathaspora passalidarum NRRL Y-27907 : SPAPADRAFT_64619, Candida tropicalis MYA-3404 : CTRG_00335 and Candida albicans WO-1 : CAWG_03437	CAL0003700	GO:0008150|GO:0003674|GO:0005575	GO:0003674=molecular_function	GO:0005575=cellular_component	GO:0008150=biological_process	GO:0003674|GO:0008150|GO:0005575
CAL0003702	0.0154037	Detected	-0.0154037	Detected	0	-0.390072	Detected	-0.285974	Detected	-0.338023	0.0248304	602.319	580.15	548.008	471.459	CAL0003702	CAL0003702	CAL0003702 (alignment of 60bp with 100.00% identity) , Description: Predicted ORF in Assemblies 19, 20 and 21, Location: Complement (797872..796688) in Candida albicans Ca21chr4, Gene: orf19.1303 , :: Next best Hit, CAL0002400 (alignment of 15bp with 1	GCATGATCTTGAAGGAGTTTTAGAAGGTAGAAAACTTGGTCAATTGATCGATGTTTATAG	CAL0003702	orf19.1303	MRF1	orf19.8883|IPF19627.2|IPF19626.1|Contig4-2781_0004|Contig4-2781_0005|Contig4-2781_0008|CA1329|orf6.1384|orf6.2777|CaO19.1303|MRF1|MRF2|CAWG_03438	Ca21chr4_C_albicans_SC5314	Ortholog(s) have translation release factor activity, role in mitochondrial translational termination and mitochondrion localization	CAL0003702	GO:0005739|GO:0070126|GO:0016149|GO:0003747	GO:0016149=translation release factor activity, codon specific|GO:0003747=translation release factor activity	GO:0005739=mitochondrion	GO:0070126=mitochondrial translational termination	GO:0016149|GO:0003747|GO:0070126|GO:0005739
CAL0003704	0.134155	Detected	-0.134155	Detected	0	-1.09528	Detected	-0.402682	Detected	-0.748981	0.18124	1034.99	845.577	531.936	688.132	CAL0003704	CAL0003704	CAL0003704 (alignment of 60bp with 100.00% identity) , Description: Predicted ORF in Assemblies 19, 20 and 21, Location: 795663..796577 in Candida albicans Ca21chr4, Gene: orf19.1304 , :: Next best Hit, CAL0005232 (alignment of 17bp with 100.00% identi	CCCCAGGGATAACTAGACTTGAAGAAGAAAGTTCATGGGAAATTTATAGTGATAAAAATG	CAL0003704	orf19.1304	RRP4	orf19.8884|IPF6681.3|IPF6682.2|Contig4-2781_0003|CA1328|orf6.2776|CaO19.1304|RRP4|CaO19.8884|CAWG_03439	Ca21chr4_C_albicans_SC5314	Ortholog(s) have role in U4 snRNA 3'-end processing, exonucleolytic trimming to generate mature 3'-end of 5.8S rRNA from tricistronic rRNA transcript (SSU-rRNA, 5.8S rRNA and LSU-rRNA), more	CAL0003704	GO:0034475|GO:0071051|GO:0003674|GO:0034427|GO:0000177|GO:0000176|GO:0005816|GO:0071038|GO:0071035|GO:0071049|GO:0000467|GO:0005829	GO:0003674=molecular_function	GO:0000177=cytoplasmic exosome (RNase complex)|GO:0000176=nuclear exosome (RNase complex)|GO:0005816=spindle pole body|GO:0005829=cytosol	GO:0034475=U4 snRNA 3'-end processing|GO:0071051=polyadenylation-dependent snoRNA 3'-end processing|GO:0034427=nuclear-transcribed mRNA catabolic process, exonucleolytic, 3'-5'|GO:0071038=nuclear polyadenylation-dependent tRNA catabolic process|GO:0071035=nuclear polyadenylation-dependent rRNA catabolic process|GO:0071049=nuclear retention of pre-mRNA with aberrant 3'-ends at the site of transcri…	GO:0003674|GO:0071035|GO:0034427|GO:0071051|GO:0071049|GO:0071038|GO:0000467|GO:0034475|GO:0005829|GO:0005816|GO:0000176|GO:0000177
CAL0003706	0.242793	Detected	-0.242793	Detected	0	-2.14096	Detected	-1.23447	Detected	-1.68771	0.0816157	3574.97	2512.37	825.491	1238.55	CAL0003706	CAL0003706	CAL0003706 (alignment of 60bp with 100.00% identity) , Description: Predicted ORF in Assemblies 19, 20 and 21, Location: Complement (795450..794101) in Candida albicans Ca21chr4, Gene: orf19.1305 , :: Next best Hit, CAL0004864 (alignment of 14bp with 1	CCCATGTTTTGTGTATCGTTTGAACTACCGGAAGAAGTGGCCTTTAAACAAAGTAAATAG	CAL0003706	orf19.1305	TRM5	orf19.8885|IPF26017.1|IPF6680.2|Contig4-2781_0001|Contig4-1569_0002|CA1327|orf6.2775|CaO19.1305|CaO19.8885|IPF6680|CAWG_03440	Ca21chr4_C_albicans_SC5314	Ortholog(s) have tRNA (guanine) methyltransferase activity, role in tRNA methylation and mitochondrial matrix, nucleus localization	CAL0003706	GO:0005759|GO:0030488|GO:0005634|GO:0016423	GO:0016423=tRNA (guanine) methyltransferase activity	GO:0005759=mitochondrial matrix|GO:0005634=nucleus	GO:0030488=tRNA methylation	GO:0016423|GO:0030488|GO:0005759|GO:0005634
CAL0003707	0.0532689	Detected	-0.0532689	Detected	0	-0.484179	Detected	-1.4675	Detected	-0.975838	0.187195	2089.4	1909.58	1734.82	702.37	CAL0003707	CAL0003707	CAL0003707 (alignment of 60bp with 100.00% identity) , Description: Predicted ORF in Assemblies 19, 20 and 21, Location: Complement (793544..792534) in Candida albicans Ca21chr4, Gene: orf19.1306 , :: Next best Hit, CAL0003820 (alignment of 15bp with 1	CATCACAGCTAAGCAACATTTACAAAAGAGATTAGCTGCTACTTATGGATGGAAGAAATA	CAL0003707	orf19.1306		orf19.8886|IPF26019.1|IPF6679.1|CA1326|orf6.2774|CaO19.8886|CaO19.1306|IPF6679|CAWG_03441	Ca21chr4_C_albicans_SC5314	Ortholog(s) have cytosol, nucleus localization	CAL0003707	GO:0016706|GO:0005634|GO:0005829|GO:0055114	GO:0016706=oxidoreductase activity, acting on paired donors, with incorporation or reduction of molecular oxygen, 2-oxoglutarate as one donor, and incorporation of one atom each of oxygen into both donors	GO:0005634=nucleus|GO:0005829=cytosol	GO:0055114=oxidation-reduction process	GO:0016706|GO:0055114|GO:0005634|GO:0005829
CAL0003709	-0.206488	Detected	0.206488	Detected	0	2.1801	Detected	1.67774	Detected	1.92892	0.0272598	85.7109	112.29	540.122	305.2	CAL0003709	CAL0003709	CAL0003709 (alignment of 60bp with 100.00% identity) , Description: Predicted ORF in Assemblies 19, 20 and 21, Location: Complement (792025..790523) in Candida albicans Ca21chr4, Gene: orf19.1307 , :: Next best Hit, CAL0000426 (alignment of 23bp with 9	CATCACATCATCACCACCAAATATTGTTGTTGTTCAAGGCAAAAACCATCAATACCAAAT	CAL0003709	orf19.1307		orf19.8887|IPF26015.1|IPF6678.2|Contig4-2324_0002|CA1325|orf6.2773|CaO19.1307|CaO19.8887|IPF6678|CAWG_03442	Ca21chr4_C_albicans_SC5314	Has domain(s) with predicted membrane localization	CAL0003709	GO:0008150|GO:0003674|GO:0016020	GO:0003674=molecular_function	GO:0016020=membrane	GO:0008150=biological_process	GO:0003674|GO:0008150|GO:0016020
CAL0003710	0.0398273	Detected	-0.0398273	Detected	0	-0.27893	Detected	0.0823336	Detected	-0.0982981	0.64824	7233.34	6735.16	6988.83	7185.81	CAL0003710	CAL0003710	CAL0003710 (alignment of 60bp with 100.00% identity) , Description: Predicted membrane transporter, member of the drug:proton antiporter (14 spanner) (DHA2) family, major facilitator superfamily (MFS), Location: 788714..790459 in Candida albicans Ca21ch	GCAACAATTGTTCTTGGTGTCATTTCATCTTTATTCATGAGAGAACACGTTTTACACACA	CAL0003710	orf19.1308	VBA1	orf19.8888|IPF18658.2|IPF6676.2|Contig4-2324_0003|CA1324|orf6.2772|orf6.3105|FNX1|CaO19.1308|IPF6676|CAWG_03443	Ca21chr4_C_albicans_SC5314	Predicted membrane transporter, member of the drug:proton antiporter (14 spanner) (DHA2) family, major facilitator superfamily (MFS)	CAL0003710	GO:0000329|GO:0032975|GO:0016020|GO:0006867|GO:0015182|GO:0015188|GO:0016021|GO:0015893|GO:0015818|GO:0015238|GO:0015807|GO:0015189|GO:0015819	GO:0015182=L-asparagine transmembrane transporter activity|GO:0015188=L-isoleucine transmembrane transporter activity|GO:0015238=drug transmembrane transporter activity|GO:0015189=L-lysine transmembrane transporter activity	GO:0000329=fungal-type vacuole membrane|GO:0016020=membrane|GO:0016021=integral to membrane	GO:0032975=amino acid import into vacuole|GO:0006867=asparagine transport|GO:0015893=drug transport|GO:0015818=isoleucine transport|GO:0015807=L-amino acid transport|GO:0015819=lysine transport	GO:0015238|GO:0015188|GO:0015182|GO:0015189|GO:0015893|GO:0015807|GO:0032975|GO:0015819|GO:0006867|GO:0015818|GO:0016020|GO:0016021|GO:0000329
CAL0003711	0.148906	Detected	-0.148906	Detected	0	-0.419461	Detected	-0.0651183	Detected	-0.24229	0.405018	1024.99	820.456	832.998	852.376	CAL0003711	CAL0003711	CAL0003711 (alignment of 60bp with 100.00% identity) , Description: Predicted ORF in Assemblies 19, 20 and 21; possibly spurious ORF (Annotation Working Group prediction), Location: Complement (787968..787555) in Candida albicans Ca21chr4, Gene: orf19.1	ACATGATACATTACCTAGTCGAACTAATCAATGGTCCCTCATACCAGAATATTTGAGTAT	CAL0003711	orf19.1309		orf19.8889|IPF6673.1|IPF6675.2|Contig4-2324_0006|CA1323|orf6.2771|orf6.3104|CaO19.1309|IPF6675|CAWG_03444	Ca21chr4_C_albicans_SC5314	Ortholog of C. parapsilosis CDC317 : CPAR2_403630, Candida tenuis NRRL Y-1498 : CANTEDRAFT_114295, Debaryomyces hansenii CBS767 : DEHA2G17336g and Candida dubliniensis CD36 : CD36_43290	CAL0003711	GO:0008150|GO:0003674|GO:0005575	GO:0003674=molecular_function	GO:0005575=cellular_component	GO:0008150=biological_process	GO:0003674|GO:0008150|GO:0005575
CAL0003069	0.0933456	Detected	-0.0933461	Detected	-2.38419e-07	0.247405	Detected	0.0900092	Detected	0.168707	0.301141	58.5654	50.6324	78.5304	56.3608	CAL0003069	CAL0003069	CAL0003069 (alignment of 60bp with 100.00% identity) , Description: Predicted ORF in Assemblies 19, 20 and 21, Location: 237112..237786 in Candida albicans Ca21chr6, Gene: orf19.131 , :: Next best Hit, CAL0005595 (alignment of 14bp with 100.00% identit	GGATCCAAATGAATGTTCAGTGATACGAGATTTGGGTAAAAAAGCACTTACAATCAAATC	CAL0003069	orf19.131		orf19.7777|IPF7033.2|IPF29957.1|orf6.2601|Contig4-2900_0017|CA1212|CaO19.131|BRR1|IPF7033|CAWG_05241	Ca21chr6_C_albicans_SC5314	Ortholog of C. parapsilosis CDC317 : CPAR2_602800, Candida tenuis NRRL Y-1498 : CANTEDRAFT_94450, Debaryomyces hansenii CBS767 : DEHA2F15554g and Candida dubliniensis CD36 : CD36_61330	CAL0003069	GO:0008150|GO:0003674|GO:0005575	GO:0003674=molecular_function	GO:0005575=cellular_component	GO:0008150=biological_process	GO:0003674|GO:0008150|GO:0005575
CAF0006890	0.0901089	Detected	-0.0901089	Detected	0	-0.0666056	Detected	-0.171446	Detected	-0.119026	0.371825	2159.67	1875.53	2334.7	1737.77	CAF0006890	CAF0006890	CAF0006890 (alignment of 60bp with 100.00% identity) , Description: ORF Predicted by Annotation Working Group, Location: 237906..238318 in Candida albicans Ca21chr6, Gene: orf19.131.2 , :: Next best Hit, CAL0002576 (alignment of 20bp with 95.00% identi	ACTAATCCTGCTTTAAGAATGGCAGCTAAAGTAGCAACAGAAACACCAGCTGCTCCAAAA	CAF0006890	orf19.131.2	YPR063C	IPF7031.2|IPF29965.1|Contig4-2900_0015|CA1211|IPF7031.3f|IPF7031.3|CAWG_05240	Ca21chr6_C_albicans_SC5314	Ortholog(s) have endoplasmic reticulum localization	CAF0006890	GO:0008150|GO:0003674|GO:0005783	GO:0003674=molecular_function	GO:0005783=endoplasmic reticulum	GO:0008150=biological_process	GO:0003674|GO:0003674|GO:0008150|GO:0008150|GO:0005783|GO:0005783
CAL0003720	-0.197108	Detected	0.197108	Detected	0	-0.756244	Detected	-0.468869	Detected	-0.612556	0.128664	203.362	262.983	166.331	162.481	CAL0003720	CAL0003720	CAL0003720 (alignment of 60bp with 100.00% identity) , Description: Predicted ORF in Assemblies 19, 20 and 21, Location: Complement (787132..785501) in Candida albicans Ca21chr4, Gene: orf19.1310 , :: Next best Hit, CAL0002399 (alignment of 15bp with 1	GAACACAAGGCACAACTTGCACAAAGACGTCTAAAACTTTTATATACTTGGAGGTTTATT	CAL0003720	orf19.1310	RAD34	orf19.8890|IPF6672.2|IPF18706.2|CA1547|orf6.2770|orf6.3103|IPF6672|CaO19.1310|CAWG_03445	Ca21chr4_C_albicans_SC5314	Ortholog(s) have role in nucleotide-excision repair and nucleus localization	CAL0003720	GO:0003684|GO:0005634|GO:0006289	GO:0003684=damaged DNA binding	GO:0005634=nucleus	GO:0006289=nucleotide-excision repair	GO:0003684|GO:0006289|GO:0005634
CAL0003722	0.141613	Compromised	-0.141613	Compromised	0	-0.84141	Compromised	-0.340214	Compromised	-0.590812	0.176537	8.66932	7.00991	5.2855	5.98799	CAL0003722	CAL0003722	CAL0003722 (alignment of 60bp with 100.00% identity) , Description: Similar to S. cerevisiae sporulation protein; fungal-specific (no human or murine homolog), Location: 782925..785510 in Candida albicans Ca21chr4, Gene: orf19.1311 , :: Next best Hit, C	CAACTTGGTAAATTTTTTAGTTCTCTAAAACTAATGATATCCGAGGCACCACCGGATTAT	CAL0003722	orf19.1311	SPO75	orf19.8891|IPF6671.2|IPF29492.1|Contig4-2805_0006|CA1546|orf6.3102|CaO19.8891|IPF6671|CaO19.1311|CAWG_03446	Ca21chr4_C_albicans_SC5314	Ortholog(s) have role in ascospore wall assembly	CAL0003722	GO:0003674|GO:0016020|GO:0030476	GO:0003674=molecular_function	GO:0016020=membrane	GO:0030476=ascospore wall assembly	GO:0003674|GO:0030476|GO:0016020
CAL0003726	0.0521874	Detected	-0.0521874	Detected	0	-0.682517	Detected	-0.645086	Detected	-0.663801	0.00690372	942.298	862.493	682.403	560.568	CAL0003726	CAL0003726	CAL0003726 (alignment of 60bp with 100.00% identity) , Description: Transporter of the Pdrp/Cdrp family of the ATP-binding cassette (ABC) superfamily; transports phospholipids in an out-to-in direction; expressed in opaque-phase cells; induced by macroph	TTTTTCGATAAATTGCCATTCTTGAATGGTGGTGGTGACACCAATCATGAAAACGTTTAA	CAL0003726	orf19.1313	CDR3	orf19.8892|orf19.8893|IPF26026.1|IPF14709.3|YPL088-1|Contig4-1792_0002|CA1545|orf6.3101|orf6.4875|orf19.1312|CaO19.8892|CaO19.1312|CA2821|CDR3.3eoc|IPF17152.1|CDR3.5eoc|IPF14709.2|CAWG_03447	Ca21chr4_C_albicans_SC5314	Transporter of the Pdrp/Cdrp family of the ATP-binding cassette (ABC) superfamily; transports phospholipids in an out-to-in direction; expressed in opaque-phase cells; induced by macrophage interaction; fluconazole-downregulated	CAL0003726	GO:0005215|GO:0006810|GO:0042626|GO:0046618|GO:0016021|GO:0005548|GO:0005524|GO:0045332	GO:0005215=transporter activity|GO:0042626=ATPase activity, coupled to transmembrane movement of substances|GO:0005548=phospholipid transporter activity|GO:0005524=ATP binding	GO:0016021=integral to membrane	GO:0006810=transport|GO:0046618=drug export|GO:0045332=phospholipid translocation	GO:0005548|GO:0042626|GO:0005215|GO:0005524|GO:0045332|GO:0046618|GO:0006810|GO:0016021
CAL0003728	-0.0819788	Detected	0.0819788	Detected	0	1.19201	Detected	0.770298	Detected	0.981154	0.0492696	694.838	765.997	2024.94	1210	CAL0003728	CAL0003728	CAL0003728 (alignment of 60bp with 100.00% identity) , Description: Predicted ORF in Assemblies 19, 20 and 21, Location: Complement (772087..770678) in Candida albicans Ca21chr4, Gene: orf19.1314 , :: Next best Hit, CAL0004251 (alignment of 14bp with 1	CTGAAGAACTGGGATTAGGTAACATATATGAAACGGTTTCTCGAAGTAATTCTGAAGAAA	CAL0003728	orf19.1314		orf19.8894|IPF26016.1|IPF17153.2|CA2822|orf6.4876|CaO19.1314|CaO19.8894|IPF14550|CAWG_03448	Ca21chr4_C_albicans_SC5314	Planktonic growth-induced gene	CAL0003728	GO:0008150|GO:0008270|GO:0005575	GO:0008270=zinc ion binding	GO:0005575=cellular_component	GO:0008150=biological_process	GO:0008270|GO:0008150|GO:0005575
CAL0003732	0.0100555	Detected	-0.0100555	Detected	0	0.558364	Detected	0.140057	Detected	0.34921	0.237308	1098.4	1065.84	1935.69	1159.4	CAL0003732	CAL0003732	CAL0003732 (alignment of 60bp with 100.00% identity) , Description: Protein required for wild-type filamentation; has oxysterol binding protein domain and pleckstrin homology motif; overproducton suppresses cph1 homozygous null filamnetation defect; simi	CCCGATTTACAACTTTATGAAAAGGGAGATACAGACACTGCAGAAACTTTGAAAAACAAA	CAL0003732	orf19.1317	OSH3	orf19.8897|IPF26009.1|IPF14554.2|Contig4-1592_0001|CA2823|orf6.4879|CaO19.1317|CaO19.8897|IPF14554|CAWG_03449	Ca21chr4_C_albicans_SC5314	Protein required for wild-type filamentation; has oxysterol binding protein domain and pleckstrin homology motif; overproducton suppresses cph1 homozygous null filamnetation defect; similar to S. cerevisiae Osh3p	CAL0003732	GO:0032541|GO:0015248|GO:0030447|GO:0030011|GO:0006887|GO:0006897|GO:0005829|GO:0001403|GO:0007124|GO:0000742|GO:0044182|GO:0010922|GO:0015918|GO:0016021|GO:0005496	GO:0015248=sterol transporter activity|GO:0005496=steroid binding	GO:0032541=cortical endoplasmic reticulum|GO:0005829=cytosol|GO:0016021=integral to membrane	GO:0030447=filamentous growth|GO:0030011=maintenance of cell polarity|GO:0006887=exocytosis|GO:0006897=endocytosis|GO:0001403=invasive growth in response to glucose limitation|GO:0007124=pseudohyphal growth|GO:0000742=karyogamy involved in conjugation with cellular fusion|GO:0044182=filamentous growth of a population of unicellular organisms|GO:0010922=positive regulation of phosphatase activity|…	GO:0005496|GO:0015248|GO:0030447|GO:0044182|GO:0007124|GO:0015918|GO:0010922|GO:0006897|GO:0000742|GO:0006887|GO:0030011|GO:0001403|GO:0005829|GO:0032541|GO:0016021
CAL0003733	-0.0132914	Detected	0.0132914	Detected	0	0.302876	Detected	0.343627	Detected	0.323251	0.00561625	375.468	376.324	563.338	463.828	CAL0003733	CAL0003733	CAL0003733 (alignment of 60bp with 100.00% identity) , Description: Predicted ORF in Assemblies 19, 20 and 21, Location: 765747..766820 in Candida albicans Ca21chr4, Gene: orf19.1318 , :: Next best Hit, CAL0005255 (alignment of 19bp with 94.74% identit	CAATACCGGAAGATGAATTGGTAACAATTTGTATAGCAACTGTGTTGAAACGACAAAAAG	CAL0003733	orf19.1318		orf19.8898|IPF26020.1|IPF17888.2|Contig4-1592_0002|CA2824|orf6.4880|CaO19.1318|CaO19.8898|IPF17888|CAWG_03450	Ca21chr4_C_albicans_SC5314	Ortholog of C. parapsilosis CDC317 : CPAR2_403560, Debaryomyces hansenii CBS767 : DEHA2A08250g, Candida dubliniensis CD36 : CD36_43350 and Pichia stipitis Pignal : PICST_29838	CAL0003733	GO:0008150|GO:0003674|GO:0005575	GO:0003674=molecular_function	GO:0005575=cellular_component	GO:0008150=biological_process	GO:0003674|GO:0008150|GO:0005575
CAL0003071	0.0141258	Detected	-0.0141258	Detected	0	0.201406	Detected	0.0636425	Detected	0.132524	0.200137	2554.41	2464.75	3505	2549.98	CAL0003071	CAL0003071	CAL0003071 (alignment of 60bp with 100.00% identity) , Description: Putative ortholog of S. cerevisiae SIF2; has a LisH motif; predicted ORF in Assemblies 19, 20 and 21, Location: Complement (240202..238421) in Candida albicans Ca21chr6, Gene: orf19.132	GTGTTTCCTACAATGGTATGGAAAGTGTTATAATCCACACAACATAAAGAACCCCAAAAA	CAL0003071	orf19.132	SIF2	orf19.7778|IPF7030.3|IPF29947.1|orf6.2600|orf6.3482|Contig4-2900_0013|CA1210|SIF2|CaO19.132|IPF7030|IPF7030.2|CAWG_05239	Ca21chr6_C_albicans_SC5314	Ortholog(s) have role in histone deacetylation, negative regulation of chromatin silencing at telomere, negative regulation of meiosis, positive regulation of stress-activated MAPK cascade	CAL0003071	GO:0003674|GO:0016575|GO:0030447|GO:0034967|GO:0044182|GO:0032874|GO:0031939|GO:0045835|GO:1900429|GO:0070210	GO:0003674=molecular_function	GO:0034967=Set3 complex|GO:0070210=Rpd3L-Expanded complex	GO:0016575=histone deacetylation|GO:0030447=filamentous growth|GO:0044182=filamentous growth of a population of unicellular organisms|GO:0032874=positive regulation of stress-activated MAPK cascade|GO:0031939=negative regulation of chromatin silencing at telomere|GO:0045835=negative regulation of meiosis|GO:1900429=negative regulation of filamentous growth of a population of unicellular organisms	GO:0003674|GO:0044182|GO:1900429|GO:0045835|GO:0031939|GO:0032874|GO:0016575|GO:0030447|GO:0034967|GO:0070210
CAL0003753	-0.0268812	Detected	0.0268812	Detected	0	2.35568	Detected	1.92724	Detected	2.14146	0.0100119	1393.04	1422.77	8753.99	5206.6	CAL0003753	CAL0003753	CAL0003753 (alignment of 60bp with 100.00% identity) , Description: Hyphal cell wall protein; covalently crosslinked to epithelial cells by host transglutaminase; opaque- and a-specific, alpha-factor induced; at MTLa side of conjugation tube; assessment	ATGCAACCATCTGCCAATTACTCAAGTGTCGCTCCTATTTCTACATTTGAAGGTGCTGGT	CAL0003753	orf19.1321	HWP1	orf19.8901|ECE2|IPF26012.1|IPF12916.1|Contig4-2436_0002|CA2825|orf6.4883|CaO19.1321|CaO19.8901|CAWG_03451	Ca21chr4_C_albicans_SC5314	Hyphal cell wall protein; covalently crosslinked to epithelial cells by host transglutaminase; opaque- and a-specific, alpha-factor induced; at MTLa side of conjugation tube; assessment of virulence role complicated by URA3 effects	CAL0003753	GO:0043707|GO:0009986|GO:0031505|GO:0044117|GO:0043708|GO:0030446|GO:0044406|GO:0016337|GO:0044011|GO:0044182|GO:0009277|GO:0009405|GO:0005937|GO:0007155|GO:0050839	GO:0050839=cell adhesion molecule binding	GO:0009986=cell surface|GO:0030446=hyphal cell wall|GO:0009277=fungal-type cell wall|GO:0005937=mating projection	GO:0043707=cell adhesion involved in single-species biofilm formation in or on host organism|GO:0031505=fungal-type cell wall organization|GO:0044117=growth of symbiont in host|GO:0043708=cell adhesion involved in biofilm formation|GO:0044406=adhesion to host|GO:0016337=cell-cell adhesion|GO:0044011=single-species biofilm formation on inanimate substrate|GO:0044182=filamentous growth of a populat…	GO:0050839|GO:0044406|GO:0044406|GO:0009405|GO:0009405|GO:0009405|GO:0031505|GO:0044011|GO:0016337|GO:0007155|GO:0043708|GO:0044182|GO:0043707|GO:0044117|GO:0009277|GO:0009986|GO:0009986|GO:0009986|GO:0009986|GO:0009986|GO:0030446|GO:0005937|GO:0009277|GO:0009986|GO:0009277|GO:0030446|GO:0030446|GO:0009277
CAL0003756	-0.0793967	Detected	0.0793967	Detected	0	0.600135	Detected	0.243236	Detected	0.421686	0.163485	417.613	458.737	806.036	503.776	CAL0003756	CAL0003756	CAL0003756 (alignment of 60bp with 100.00% identity) , Description: Phosphorylated protein of unknown function; predicted ORF in Assemblies 19, 20 and 21, Location: 758543..760858 in Candida albicans Ca21chr4, Gene: orf19.1323 , :: Next best Hit, CAL000	CTCAGCAACGAGAACTATTGTCTCAAGTTGAAAAGAAACAAACACTGAAGTATAAACTAC	CAL0003756	orf19.1323	APL6	orf19.8903|IPF26010.1|IPF12906.2|Contig4-2436_0008|CA2826|orf6.4885|APL6|CaO19.1323|CaO19.8903|CAWG_03452	Ca21chr4_C_albicans_SC5314	Phosphorylated protein of unknown function; Hap43p-repressed gene	CAL0003756	GO:0003674|GO:0005634|GO:0006896|GO:0006886|GO:0030117|GO:0005829	GO:0003674=molecular_function	GO:0005634=nucleus|GO:0030117=membrane coat|GO:0005829=cytosol	GO:0006896=Golgi to vacuole transport|GO:0006886=intracellular protein transport	GO:0003674|GO:0006886|GO:0006896|GO:0030117|GO:0005634|GO:0005829
CAL0003758	-0.120225	Detected	0.120225	Detected	0	0.927222	Detected	0.649222	Detected	0.788222	0.0502965	370.322	430.476	922.386	608.901	CAL0003758	CAL0003758	CAL0003758 (alignment of 60bp with 100.00% identity) , Description: Ortholog of S. cerevisiae RAD2, nucleotide excision repair nuclease; null mutant is extremely sensitive to UV irradiation; transcription is upregulated upon interaction with macrophages,	GTCATGGTACCACTTGTACAAGACATGAACAAGAAAAAATTAGAAGGAAGACAATCTACT	CAL0003758	orf19.1324	RAD2	orf19.8904|IPF26007.1|IPF19770.1|CA2827|orf6.4886|CaO19.1324|RAD13|CaO19.8904|CAWG_03453	Ca21chr4_C_albicans_SC5314	Ortholog of S. cerevisiae RAD2, nucleotide excision repair nuclease; null mutant is extremely sensitive to UV irradiation; transcription is upregulated upon interaction with macrophages	CAL0003758	GO:0034644|GO:0006366|GO:0006295|GO:0003697|GO:0000112|GO:0000014	GO:0003697=single-stranded DNA binding|GO:0000014=single-stranded DNA specific endodeoxyribonuclease activity	GO:0000112=nucleotide-excision repair factor 3 complex	GO:0034644=cellular response to UV|GO:0006366=transcription from RNA polymerase II promoter|GO:0006295=nucleotide-excision repair, DNA incision, 3'-to lesion	GO:0000014|GO:0003697|GO:0000014|GO:0006295|GO:0006295|GO:0006366|GO:0034644|GO:0000112|GO:0000112
CAL0003759	0.0794749	Detected	-0.0794749	Detected	0	1.61632	Detected	0.91594	Detected	1.26613	0.0718737	1149.3	1012.92	4018.76	1979.6	CAL0003759	CAL0003759	CAL0003759 (alignment of 60bp with 100.00% identity) , Description: Alkaline upregulated, Location: Complement (754731..752971) in Candida albicans Ca21chr4, Gene: orf19.1325 , :: Next best Hit, CAL0005406 (alignment of 14bp with 100.00% identity) ,Des	TTAATATACGCTGGTGGTAGCGACATGAGAGGTGATGGTGCAGCTGTTGCCTTGATTTAA	CAL0003759	orf19.1325	ECM38	orf19.8905|IPF26013.1|IPF17026.2|CA2828|orf6.4887|CSA99|CaO19.1325|CaO19.8905|IPF17026|CAWG_03454	Ca21chr4_C_albicans_SC5314	Putative gamma-glutamyltransferase; alkaline upregulated; possibly an essential gene, disruptants not obtained by UAU1 method	CAL0003759	GO:0008150|GO:0003840|GO:0005575	GO:0003840=gamma-glutamyltransferase activity	GO:0005575=cellular_component	GO:0008150=biological_process	GO:0003840|GO:0008150|GO:0005575
CAL0003761	0.139528	Detected	-0.139528	Detected	0	0.102803	Detected	0.154296	Detected	0.12855	0.460555	519.134	420.981	609.88	505.901	CAL0003761	CAL0003761	CAL0003761 (alignment of 60bp with 100.00% identity) , Description: Predicted ORF in Assemblies 19, 20 and 21, Location: 750848..752818 in Candida albicans Ca21chr4, Gene: orf19.1326 , :: Next best Hit, CAL0006374 (alignment of 14bp with 100.00% identi	CGTTCTTCCCGTTTGATCTGTATAGGAGAGAGTCGTGATCCTCATTTTGAGAATTATGAA	CAL0003761	orf19.1326		orf19.8906|IPF26011.1|IPF14593.2|Contig4-2287_0002|CA2829|orf6.4888|LPF13|CaO19.8906|IFA7|CaO19.1326|CAWG_03455	Ca21chr4_C_albicans_SC5314	Ortholog of Candida albicans WO-1 : CAWG_03455	CAL0003761	GO:0008150|GO:0003674|GO:0005575	GO:0003674=molecular_function	GO:0005575=cellular_component	GO:0008150=biological_process	GO:0003674|GO:0008150|GO:0005575
CAL0003763	-0.0289664	Detected	0.0289664	Detected	0	0.371207	Detected	-0.127373	Detected	0.121917	0.675129	1112.84	1139.88	1769.78	1002.65	CAL0003763	CAL0003763	CAL0003763 (alignment of 60bp with 100.00% identity) , Description: Cell wall protein with similarity to Hwp1p, required for virulence; predicted to be cell-wall attached and glycosylated; Tup1p repressed; serum, hyphal and alkaline induced; farnesol, al	CAACCATCTGCTAACTCCTCATACACTATTGCTTCAGTCTCTTCATTCGAAGGTGCTGGT	CAL0003763	orf19.1327	RBT1	orf19.8907|orf19.10892|ECE99|IPF19252.2|IPF15385.2|IPF23893.1|IPF16136.1|Contig4-2768_0006|CA2830|orf6.2929|orf6.4889|orf6.489|CaO19.1327|RBT99|orf19.3384|CAWG_03456	Ca21chr4_C_albicans_SC5314	Cell wall protein with similarity to Hwp1p, required for virulence; predicted glycosylation; Tup1p repressed; serum, hyphal and alkaline induced; farnesol, alpha factor induced; Rfg1p-, Rim101p-regulated; fluconazole-repressed	CAL0003763	GO:0003674|GO:0009986|GO:0031505|GO:0009277|GO:0009405|GO:0005576|GO:0030446	GO:0003674=molecular_function	GO:0009986=cell surface|GO:0009277=fungal-type cell wall|GO:0005576=extracellular region|GO:0030446=hyphal cell wall	GO:0031505=fungal-type cell wall organization|GO:0009405=pathogenesis	GO:0003674|GO:0009405|GO:0031505|GO:0009277|GO:0009986|GO:0009986|GO:0005576|GO:0009277|GO:0030446|GO:0009986|GO:0030446
CAL0003073	0.0721197	Detected	-0.0721197	Detected	0	-0.328896	Detected	-0.512998	Detected	-0.420947	0.0692519	85.9663	76.5412	78.4569	55.2753	CAL0003073	CAL0003073	CAL0003073 (alignment of 60bp with 100.00% identity) , Description: Predicted ORF in Assemblies 19, 20 and 21; induced by nitric oxide in yhb1 mutant, Location: 242064..242387 in Candida albicans Ca21chr6, Gene: orf19.133 , :: Next best Hit, CAF0007084	CATATTCAATTCATCAGACACCAATCAGTGATGTTTCCTCAACATCGTCAAGTATCTTAA	CAL0003073	orf19.133		IPF29964.1|orf6.3481|Contig4-2900_0011|CaO19.133	Ca21chr6_C_albicans_SC5314	Protein of unknown function; induced by nitric oxide independent of Yhb1p
CAL0003784	-0.101422	Detected	0.101423	Detected	2.38419e-07	1.56728	Detected	0.185352	Detected	0.876314	0.336308	24.9	28.2	95.4	29.3	CAL0003784	CAL0003784	NOTE: Has potential for cross hybridization with other orfs; CAL0003784 (alignment 60 bp with 100 % identity) , Description: Predicted ORF in Assemblies 19, 20 and 21, Location: 762348..764168 in Candida albicans Ca21chr7, Gene: orf19.1330 , :: Next best	GCTTTAATTCGAGATCGTTGGCATTTTTGAAATTGAGTAAATCATGCCTTGAAGAGATTG	CAL0003784	orf19.1330		orf19.8910|IPF25994.1|IPF15703.1|CA0240|orf6.4357|orf6.959|orf6.6812|CaJ7.0397|CaO19.8910|LPF15|CaO19.1330|IFB3|CAWG_05678	Ca21chr7_C_albicans_SC5314	Ortholog of Candida albicans WO-1 : CAWG_05678	CAL0003784	GO:0008150|GO:0003674|GO:0005575	GO:0003674=molecular_function	GO:0005575=cellular_component	GO:0008150=biological_process	GO:0003674|GO:0008150|GO:0005575
CAL0003786	0.0512209	Detected	-0.0512209	Detected	0	0.243074	Detected	-0.542835	Detected	-0.14988	0.741639	1263.33	1157.89	1738.97	807.288	CAL0003786	CAL0003786	CAL0003786 (alignment of 60bp with 100.00% identity) , Description: Protein not essential for viability; similar to S. cerevisiae Hsm3p, which may be involved in DNA mismatch repair, Location: Complement (759975..758557) in Candida albicans Ca21chr7, Ge	ACATTTGGTAGAGTTTTTCGTAATGCTGCTCCAAGAGTTGATATTATTGATGAAACTGCC	CAL0003786	orf19.1331	HSM3	orf19.8911|IPF8030.1|IPF19088.2|Contig4-3068_0006|CA2115|orf6.3884|orf6.958|CaO19_1331|CaJ7_0396|CaJ7.0396|CaO19.8911|CaO19.1331|IPF8030|CAWG_05677	Ca21chr7_C_albicans_SC5314	Ortholog(s) have role in mismatch repair, proteasome regulatory particle assembly and cytosol, nucleus, proteasome regulatory particle, base subcomplex localization	CAL0003786	GO:0003674|GO:0008540|GO:0005634|GO:0006298|GO:0070682|GO:0005829	GO:0003674=molecular_function	GO:0008540=proteasome regulatory particle, base subcomplex|GO:0005634=nucleus|GO:0005829=cytosol	GO:0006298=mismatch repair|GO:0070682=proteasome regulatory particle assembly	GO:0003674|GO:0070682|GO:0006298|GO:0005634|GO:0005829|GO:0008540
CAL0003788	-0.0212293	Detected	0.0212293	Detected	0	-0.123909	Detected	-0.226224	Detected	-0.175066	0.0872033	718.955	728.568	806.887	601.634	CAL0003788	CAL0003788	CAL0003788 (alignment of 60bp with 100.00% identity) , Description: Predicted ORF in Assemblies 19, 20 and 21; transcriptionally activated by Mnl1p under weak acid stress; shows Mob2p-dependent hyphal regulation, Location: 756801..758462 in Candida albi	TCAGTCATTGGTCTACCCAAAGAGCTAAAAAGATAGCATTAGCAGAAAAGCAAAAGAAGA	CAL0003788	orf19.1332	SNG4	orf19.8912|IPF25997.1|IPF8028.1|Contig4-3068_0008|CA2116|orf6.3885|CaO19.8912|CaJ7.0395|CaJ7_0395|CaO19_1332|CaO19.1332|CAWG_05676	Ca21chr7_C_albicans_SC5314	Putative membrane transporter; Hap43p-induced gene; transcriptionally activated by Mnl1p under weak acid stress; shows Mob2p-dependent hyphal regulation	CAL0003788	GO:0008150|GO:0003674|GO:0005575	GO:0003674=molecular_function	GO:0005575=cellular_component	GO:0008150=biological_process	GO:0003674|GO:0008150|GO:0005575
CAL0003790	-0.0876522	Detected	0.0876522	Detected	0	-0.208447	Detected	-0.238483	Detected	-0.223465	0.128534	2978.32	3309.26	3300.88	2587.66	CAL0003790	CAL0003790	CAL0003790 (alignment of 60bp with 100.00% identity) , Description: Predicted ORF in Assemblies 19, 20 and 21; mutation confers hypersensitivity to toxic ergosterol analog; shows colony morphology-related orf regulation by Ssn6p, Location: Complement (75	GGCGTTACCATTTGTAATGAAATGGTTGGCAAACAAGAAAGCCAAAGCAGAAGAACAAAA	CAL0003790	orf19.1333	SNG3	orf19.8913|IPF25995.1|IPF8025.2|Contig4-3068_0011|CA2117|orf6.3886|CaO19.1333|CaJ7.0394|CaO19_1333|CaJ7_0394|CaO19.8913|CAWG_05675	Ca21chr7_C_albicans_SC5314	Putative membrane transporter; Hap43p-induced gene; mutation confers hypersensitivity to toxic ergosterol analog; shows colony morphology-related gene regulation by Ssn6p	CAL0003790	GO:0003674|GO:0005575|GO:0035690	GO:0003674=molecular_function	GO:0005575=cellular_component	GO:0035690=cellular response to drug	GO:0003674|GO:0035690|GO:0005575
CAL0003792	0.160179	Detected	-0.160178	Detected	2.38419e-07	0.0818281	Detected	-0.800798	Detected	-0.359485	0.523875	174.618	137.607	199.308	86.5263	CAL0003792	CAL0003792	CAL0003792 (alignment of 60bp with 100.00% identity) , Description: Predicted ORF in Assemblies 19, 20 and 21; possibly spurious ORF (Annotation Working Group prediction); transcription is repressed in response to alpha pheromone in SpiderM medium, Locat	CATCATCATCATCCGCACAACCCAAAGAGAAAGAAAGTAGAACCAAAAAAGTTAAAAACA	CAL0003792	orf19.1334		orf19.8914|IPF25991.1|IPF8024.2|Contig4-3068_0019|CA2118|orf6.3887|CaO19.1334|CaO19.8914|CaJ7.0393|IPF8024|CaJ7_0393|CaO19_1334|CAWG_05674	Ca21chr7_C_albicans_SC5314	Predicted ORF in Assemblies 19, 20 and 21; transcription is repressed in response to alpha pheromone in SpiderM medium	CAL0003792	GO:0008150|GO:0003674|GO:0005575	GO:0003674=molecular_function	GO:0005575=cellular_component	GO:0008150=biological_process	GO:0003674|GO:0008150|GO:0005575
CAL0003794	0.127415	Detected	-0.127415	Detected	0	-1.72043	Detected	-0.685945	Detected	-1.20319	0.152434	4088.26	3371.44	1368.69	2244.06	CAL0003794	CAL0003794	CAL0003794 (alignment of 60bp with 100.00% identity) , Description: Predicted ORF in Assemblies 19, 20 and 21, Location: Complement (749033..745845) in Candida albicans Ca21chr7, Gene: orf19.1335 , :: Next best Hit, CAL0001103 (alignment of 14bp with 1	CTTGCCTTAGTTGAAGTTGTATTTGTATGGTCTAATGGTGCTTCATTCAGTTCAATTTGT	CAL0003794	orf19.1335	MTR4	orf19.8915|IPF8020.2|IPF29491.1|Contig4-3068_0020|Contig4-3068_0022|Contig4-3068_0024|CA2119|orf6.223|orf6.3888|CaO19_1335|CaJ7_0392|MTR4|CaO19.1335|CaJ7.0392|CaO19.8915|CAWG_05673	Ca21chr7_C_albicans_SC5314	Hap43p-induced gene; ortholog of S. cerevisiae MTR4, an ATP-dependent 3'-5' RNA helicase of the DEAD-box family	CAL0003794	GO:0034475|GO:0043629|GO:0071038|GO:0071035|GO:0005730|GO:0005524|GO:0034476|GO:0071051|GO:0071042|GO:0031499|GO:0008143|GO:0034459|GO:0071049|GO:0000467	GO:0005524=ATP binding|GO:0008143=poly(A) RNA binding|GO:0034459=ATP-dependent 3'-5' RNA helicase activity	GO:0005730=nucleolus|GO:0031499=TRAMP complex	GO:0034475=U4 snRNA 3'-end processing|GO:0043629=ncRNA polyadenylation|GO:0071038=nuclear polyadenylation-dependent tRNA catabolic process|GO:0071035=nuclear polyadenylation-dependent rRNA catabolic process|GO:0034476=U5 snRNA 3'-end processing|GO:0071051=polyadenylation-dependent snoRNA 3'-end processing|GO:0071042=nuclear polyadenylation-dependent mRNA catabolic process|GO:0071049=nuclear reten…	GO:0005524|GO:0008143|GO:0034459|GO:0034476|GO:0000467|GO:0071049|GO:0071035|GO:0043629|GO:0071051|GO:0071042|GO:0071038|GO:0034475|GO:0005730|GO:0031499
CAL0003796	-0.000658989	Detected	0.000658989	Detected	0	0.122938	Detected	-0.00913238	Detected	0.0569029	0.479685	8787.42	8654.57	11536.9	8426.58	CAL0003796	CAL0003796	CAL0003796 (alignment of 60bp with 100.00% identity) , Description: Predicted ORF in Assemblies 19, 20 and 21; macrophage/pseudohyphal-repressed, Location: Complement (745555..744935) in Candida albicans Ca21chr7, Gene: orf19.1336 , :: Next best Hit, CA	TGAGTGGATGGGGTGCTGTTGTATACATAGTGACTAAAGATAAAGTGATTAAAAGGGTAT	CAL0003796	orf19.1336	PUP3	orf19.8916|IPF8017.2|IPF8018.1|Contig4-3068_0025|CA2120|orf6.224|orf6.3889|CaO19.1336|CaJ7.0390|CaJ7_0390|CaO19_1336|CAWG_05672	Ca21chr7_C_albicans_SC5314	Putative beta 3 subunit of the 20S proteasome; macrophage/pseudohyphal-repressed	CAL0003796	GO:0019774|GO:0061133|GO:0005634|GO:0043161|GO:0005829|GO:0010499|GO:0004298	GO:0061133=endopeptidase activator activity|GO:0004298=threonine-type endopeptidase activity	GO:0019774=proteasome core complex, beta-subunit complex|GO:0005634=nucleus|GO:0005829=cytosol	GO:0043161=proteasomal ubiquitin-dependent protein catabolic process|GO:0010499=proteasomal ubiquitin-independent protein catabolic process	GO:0004298|GO:0061133|GO:0043161|GO:0010499|GO:0005634|GO:0005829|GO:0019774
CAF0006924	0.177389	Detected	-0.177389	Detected	0	-0.191803	Detected	-0.215905	Detected	-0.203854	0.370234	130.517	100.429	121.773	95.8553	CAF0006924	CAF0006924	CAF0006924(alignment 60bp with 100.00% identity) , Description: ORF Predicted by Annotation Working Group, Location: 744395..744694 in Candida albicans Ca21chr7, Gene: orf19.1336.2 , :: Next best hit , location within target gene 221-280 , CAL0005735(al	AACAAGCAGAAGAAGAAGCATATGGTAAGAATGGATATTTGAAAAAAGTATTAGAAGCAG	CAF0006924	orf19.1336.2	CMC2	IPF26004.1|IPF8016.2|CA0034|IPF8016|CAWG_05671	Ca21chr7_C_albicans_SC5314	Ortholog(s) have role in mitochondrial respiratory chain complex assembly and mitochondrial intermembrane space, nucleus localization	CAF0006924	GO:0005758|GO:0003674|GO:0033108|GO:0005634	GO:0003674=molecular_function	GO:0005758=mitochondrial intermembrane space|GO:0005634=nucleus	GO:0033108=mitochondrial respiratory chain complex assembly	GO:0003674|GO:0003674|GO:0033108|GO:0033108|GO:0005634|GO:0005758|GO:0005634|GO:0005758
CAL0003798	0.0484333	Detected	-0.0484333	Detected	0	0.258968	Detected	-0.298816	Detected	-0.0199237	0.950292	6064.35	5579.71	8456.34	4598.25	CAL0003798	CAL0003798	CAL0003798 (alignment of 60bp with 100.00% identity) , Description: Predicted ORF in Assemblies 19, 20 and 21, Location: Complement (743668..742574) in Candida albicans Ca21chr7, Gene: orf19.1338 , :: Next best Hit, CAL0006036 (alignment of 15bp with 1	TTGGATTTGAGTGTTGGAATACTGGTCCAACAGTACATTATTAACAGAATGGGTGTTTGA	CAL0003798	orf19.1338	MTC1	orf19.8918|IPF7930.1|IPF19386.2|Contig4-3068_0028|CA2121|orf6.3891|CaJ7.0389|CaO19.8918|CaO19.1338|CaO19_1338|CaJ7_0389|IPF7930|CAWG_05670	Ca21chr7_C_albicans_SC5314	Ortholog(s) have COPI-coated vesicle, Golgi apparatus, ribosome localization	CAL0003798	GO:0008150|GO:0003674|GO:0005794|GO:0030137|GO:0005840	GO:0003674=molecular_function	GO:0005794=Golgi apparatus|GO:0030137=COPI-coated vesicle|GO:0005840=ribosome	GO:0008150=biological_process	GO:0003674|GO:0008150|GO:0005840|GO:0005794|GO:0030137
CAL0003075	-0.189043	Detected	0.189043	Detected	0	-0.180705	Detected	-0.474096	Compromised	-0.327401	0.304669	20.1442	25.7604	24.4164	15.9471	CAL0003075	CAL0003075	CAL0003075 (alignment of 60bp with 100.00% identity) , Description: Predicted ORF in Assemblies 19, 20 and 21; ciclopirox olamine induced, Location: 244274..244684 in Candida albicans Ca21chr6, Gene: orf19.134 , :: Next best Hit, CAL0002963 (alignment o	ATATTTTTGCTCGGCCAAGCTTATAACGAATCAACACTTCAACCTGTAATTTTGACAACC	CAL0003075	orf19.134		IPF7023.2|orf6.3480|Contig4-2900_0005|CA1818|CaO19.134|IPF7023.3f|IPF7023.3	Ca21chr6_C_albicans_SC5314	Predicted ORF in Assemblies 19, 20 and 21; ciclopirox olamine induced
CAL0003819	0.0447054	Detected	-0.0447054	Detected	0	0.375839	Detected	0.719677	Detected	0.547758	0.0910357	6465.24	5979.38	9801.36	9956.62	CAL0003819	CAL0003819	CAL0003819 (alignment of 60bp with 100.00% identity) , Description: Predicted ORF in Assemblies 19, 20 and 21; protein level decreased in stationary phase cultures, Location: Complement (739871..738942) in Candida albicans Ca21chr7, Gene: orf19.1340 , :	GAAATTGGTAGTGCCAATCCTCATCGTGTCTTTTTCCATGAAGCATTTAAAGATTTATAG	CAL0003819	orf19.1340	YDL124W	orf19.8920|IPF18538.2|IPF7927.1|Contig4-3068_0030|CA0431|orf6.1342|CaO19_1340|CaJ7_0387|CaJ7.0387|CaO19.1340|IPF7927|CAWG_05668	Ca21chr7_C_albicans_SC5314	Putative aldose reductase; protein level decreases in stationary phase cultures	CAL0003819	GO:0006725|GO:0005886|GO:0051269|GO:0051268|GO:0047019|GO:0047018|GO:0005634|GO:0043603|GO:0005829|GO:0016652|GO:0004032|GO:0034599|GO:0042180|GO:0055114	GO:0051269=alpha-keto ester reductase activity|GO:0051268=alpha-keto amide reductase activity|GO:0047019=indole-3-acetaldehyde reductase (NADPH) activity|GO:0047018=indole-3-acetaldehyde reductase (NADH) activity|GO:0016652=oxidoreductase activity, acting on NADH or NADPH, NAD or NADP as acceptor|GO:0004032=alditol:NADP+ 1-oxidoreductase activity	GO:0005886=plasma membrane|GO:0005634=nucleus|GO:0005829=cytosol	GO:0006725=cellular aromatic compound metabolic process|GO:0043603=cellular amide metabolic process|GO:0034599=cellular response to oxidative stress|GO:0042180=cellular ketone metabolic process|GO:0055114=oxidation-reduction process	GO:0004032|GO:0051269|GO:0047018|GO:0016652|GO:0047019|GO:0051268|GO:0055114|GO:0043603|GO:0034599|GO:0006725|GO:0042180|GO:0005634|GO:0005829|GO:0005886
CAL0003821	-0.0371752	Detected	0.0371757	Detected	2.38419e-07	0.311897	Detected	0.0838451	Detected	0.197871	0.240757	224.249	232.327	344.217	235.235	CAL0003821	CAL0003821	CAL0003821 (alignment of 60bp with 100.00% identity) , Description: Predicted ORF in Assemblies 19, 20 and 21; mutation confers resistance to 5-fluorocytosine (5-FC), Location: Complement (738804..737848) in Candida albicans Ca21chr7, Gene: orf19.1341 ,	GGTATTGACAACAAAACTTGTGGGATTGATCATGGGAAATCCTTCAGAGTCAAAACTTAG	CAL0003821	orf19.1341	PRR2	orf19.8921|IPF25999.1|IPF7926.1|Contig4-3068_0031|CA0432|orf6.1343|CaJ7.0386|CaO19.1341|CaJ7_0386|CaO19_1341|IPF7926|CAWG_05667	Ca21chr7_C_albicans_SC5314	Putative serine/threonine protein kinase; mutation confers resistance to 5-fluorocytosine (5-FC)	CAL0003821	GO:0004674|GO:0006468|GO:0005575|GO:0035690|GO:0005524	GO:0004674=protein serine/threonine kinase activity|GO:0005524=ATP binding	GO:0005575=cellular_component	GO:0006468=protein phosphorylation|GO:0035690=cellular response to drug	GO:0004674|GO:0005524|GO:0035690|GO:0006468|GO:0005575
CAL0003822	0.0569949	Detected	-0.0569949	Detected	0	-0.690715	Detected	-0.634912	Detected	-0.662814	0.00904209	20527.4	18664.1	14732.3	12257.2	CAL0003822	CAL0003822	CAL0003822 (alignment of 60bp with 100.00% identity) , Description: Mitochondrial serine hydroxymethyltransferase; complements the glycine auxotrophy of an S. cerevisiae shm1 null shm2 null gly1-1 triple mutant; protein detected by mass spec in exponenti	CAATTAGATAAAGAAGTTGTCAGTTGGGTCAGTAAATATCCTGTCCCAGGTGAATTGTAA	CAL0003822	orf19.1342	SHM1	orf19.8922|orf6.1344|IPF19725.2|IPF7924.2|Contig4-3068_0034|CA0433|orf6.2646|CaJ7_0385|CaO19_1342|CaJ7.0385|CaO19.1342|CAWG_05666	Ca21chr7_C_albicans_SC5314	Mitochondrial serine hydroxymethyltransferase; complements the glycine auxotrophy of an S. cerevisiae shm1 null shm2 null gly1-1 triple mutant; protein present in exponential and stationary growth phase yeast cultures	CAL0003822	GO:0005739|GO:0009070|GO:0030170|GO:0006544|GO:0006563|GO:0006730|GO:0004372	GO:0030170=pyridoxal phosphate binding|GO:0004372=glycine hydroxymethyltransferase activity	GO:0005739=mitochondrion	GO:0009070=serine family amino acid biosynthetic process|GO:0006544=glycine metabolic process|GO:0006563=L-serine metabolic process|GO:0006730=one-carbon metabolic process	GO:0004372|GO:0030170|GO:0006544|GO:0006730|GO:0006563|GO:0009070|GO:0005739
CAL0003824	-0.0981035	Detected	0.0981035	Detected	0	0.454374	Detected	0.354967	Detected	0.404671	0.0665672	7576.51	8541.24	13390.7	10004.6	CAL0003824	CAL0003824	CAL0003824 (alignment of 60bp with 100.00% identity) , Description: Predicted ORF in Assemblies 19, 20 and 21; induced by nitric oxide, Location: Complement (735818..732660) in Candida albicans Ca21chr7, Gene: orf19.1343 , :: Next best Hit, CAL0001638 (	GGCTTATGGACTATGGTGTTTCAGCGTACTTGTATGTGTGGCAATGCATGGGTAAATGTA	CAL0003824	orf19.1343	SIN4	orf19.8923|IPF7922.2|IPF17576.2|Contig4-3068_0036|CA1243|orf6.1345|orf6.2645|CaJ7.0384|CaJ7_0384|CaO19_1343|SIN4|CaO19.1343|IPF7922|CAWG_05665	Ca21chr7_C_albicans_SC5314	Putative RNA polymerase II mediator complex subunit; induced by nitric oxide	CAL0003824	GO:0001102|GO:0045944|GO:0051123|GO:0000122|GO:0070847	GO:0001102=RNA polymerase II activating transcription factor binding	GO:0070847=core mediator complex	GO:0045944=positive regulation of transcription from RNA polymerase II promoter|GO:0051123=RNA polymerase II transcriptional preinitiation complex assembly|GO:0000122=negative regulation of transcription from RNA polymerase II promoter	GO:0001102|GO:0000122|GO:0045944|GO:0051123|GO:0070847
CAL0003826	-0.0643535	Detected	0.0643535	Detected	0	0.312234	Detected	0.316718	Detected	0.314476	0.039462	744.295	800.713	1164.47	934.974	CAL0003826	CAL0003826	CAL0003826 (alignment of 60bp with 100.00% identity) , Description: Predicted ORF in Assemblies 19, 20 and 21; fluconazole-induced; possibly spurious ORF (Annotation Working Group prediction), Location: 731818..732486 in Candida albicans Ca21chr7, Gene:	CTGGTACTGTTAAATATAACGATTTGGTTCATCCTCATATGGCTGAATTTGCTGATTTGT	CAL0003826	orf19.1344		orf19.8924|IPF26000.1|IPF19908.1|Contig4-3068_0038|Contig4-3068_0040|CA1242|orf6.2644|CaO19.1344|CaJ7.0383|CaO19.8924|CaJ7_0383|CaO19_1344|IPF19908|CAWG_05664	Ca21chr7_C_albicans_SC5314	Predicted ORF in Assemblies 19, 20 and 21; fluconazole-induced	CAL0003826	GO:0008150|GO:0003674|GO:0005575	GO:0003674=molecular_function	GO:0005575=cellular_component	GO:0008150=biological_process	GO:0003674|GO:0008150|GO:0005575
CAL0003827	0.212913	Compromised	-0.212913	Compromised	0	1.36228	Detected	-0.318116	Compromised	0.522081	0.608143	9.76397	7.152	26.1	6.51795	CAL0003827	CAL0003827	CAL0003827 (alignment of 60bp with 100.00% identity) , Description: Secreted lipase, member of a differentially expressed lipase orf family with possible roles in nutrition and/or in creating an acidic microenvironment; LIP5 and LIP8 are expressed at all	GATATTCAAAAAGATAAAATTACCCCAGACGACCTTAGAAAGTTTTTATTAGGAGGCTGG	CAL0003827	orf19.1345	LIP8	orf19.8925|orf6.2643|IPF7914.2|IPF29487.1|Contig4-3068_0044|CA1241|CaJ7.0382|CaO19.1345|CaO19_1345|CaJ7_0382|CAWG_05663	Ca21chr7_C_albicans_SC5314	Secreted lipase, member of a differentially expressed lipase gene family with possible roles in nutrition and/or in creating an acidic microenvironment; LIP5 and LIP8 are expressed at all stages of both mucosal and systemic infection	CAL0003827	GO:0016042|GO:0004806|GO:0009405|GO:0005576|GO:0016298	GO:0004806=triglyceride lipase activity|GO:0016298=lipase activity	GO:0005576=extracellular region	GO:0016042=lipid catabolic process|GO:0009405=pathogenesis	GO:0016298|GO:0016298|GO:0004806|GO:0016042|GO:0009405|GO:0005576|GO:0005576
CAL0003832	0.178033	Compromised	-0.178032	Compromised	4.76837e-07	-0.00640488	Compromised	-0.361322	Compromised	-0.183864	0.540598	8.21883	6.31846	8.71584	5.45492	CAL0003832	CAL0003832	CAL0003832 (alignment of 60bp with 100.00% identity) , Description: Predicted ORF in Assemblies 19, 20 and 21, Location: Complement (1685138..1684575) in Candida albicans Ca21chr2, Gene: orf19.1348 , :: Next best Hit, CAL0001057 (alignment of 17bp with	AACGAAAAATCCAAATACATTAACAACTCCACCACCAGCACATTTAAGAAACACGAATGA	CAL0003832	orf19.1348		orf19.8928|orf19.12588|IPF25984.1|IPF17661.1|IPF22162.1|IPF9727.2|Contig4-3000_0022|orf6.6328|CA0250|orf6.981|orf19.5122|CaO19.8928|CaO19.1348|IPF17661|CAWG_05921	Ca21chr2_C_albicans_SC5314	Ortholog of Candida dubliniensis CD36 : CD36_22500, Candida tropicalis MYA-3404 : CTRG_01825 and Candida albicans WO-1 : CAWG_05921	CAL0003832	GO:0008150|GO:0003674|GO:0005575	GO:0003674=molecular_function	GO:0005575=cellular_component	GO:0008150=biological_process	GO:0003674|GO:0008150|GO:0005575
CAL0003833	-0.0835142	Detected	0.0835142	Detected	0	1.03018	Detected	0.779746	Detected	0.904963	0.0265647	77.1873	85.2735	201.29	135.442	CAL0003833	CAL0003833	CAL0003833 (alignment of 60bp with 100.00% identity) , Description: Predicted ORF in Assemblies 19, 20 and 21; possibly spurious ORF (Annotation Working Group prediction), Location: Complement (1683487..1683047) in Candida albicans Ca21chr2, Gene: orf19	AAACAAGGGAATTTCCATTTACTGAATAGGCCAGAAGGTGTACAACCACCTTTGCCACCA	CAL0003833	orf19.1349		orf19.8929|IPF25987.1|IPF9726.2|Contig4-3000_0024|Contig4-3000_0025|orf6.980|CaO19.1349|CaO19.8929|CAWG_05920	Ca21chr2_C_albicans_SC5314	Ortholog of Candida dubliniensis CD36 : CD36_22470, Candida tropicalis MYA-3404 : CTRG_01829 and Candida albicans WO-1 : CAWG_05920	CAL0003833	GO:0008150|GO:0003674|GO:0005575	GO:0003674=molecular_function	GO:0005575=cellular_component	GO:0008150=biological_process	GO:0003674|GO:0008150|GO:0005575
CAL0003078	-0.0422368	Detected	0.0422368	Detected	0	0.35942	Detected	0.208467	Detected	0.283944	0.0815902	738.025	769.994	1174.9	846.995	CAL0003078	CAL0003078	CAL0003078 (alignment of 60bp with 100.00% identity) , Description: Predicted ORF in Assemblies 19, 20 and 21, Location: 245503..247878 in Candida albicans Ca21chr6, Gene: orf19.135 , :: Next best Hit, CAL0002250 (alignment of 15bp with 100.00% identit	GATCGAGGGGTTCAAGGATATTTGGATTCAATGTCAGCTTATTTATCAACTACAGTATCA	CAL0003078	orf19.135	EXO84	orf19.7779|IPF18738.2|IPF7021.2|orf6.2599|orf6.3479|Contig4-2900_0003|CA1817|CaO19.135|IPF7021|CAWG_05238	Ca21chr6_C_albicans_SC5314	Predicted subunit of the exocyst complex, involved in exocytosis; localizes to a crescent on the surface of the hyphal tip	CAL0003078	GO:0043332|GO:0000245|GO:0003674|GO:0000145|GO:0001411|GO:0005934|GO:0000131|GO:0006887|GO:0005935	GO:0003674=molecular_function	GO:0043332=mating projection tip|GO:0000145=exocyst|GO:0001411=hyphal tip|GO:0005934=cellular bud tip|GO:0000131=incipient cellular bud site|GO:0005935=cellular bud neck	GO:0000245=spliceosomal complex assembly|GO:0006887=exocytosis	GO:0003674|GO:0006887|GO:0000245|GO:0006887|GO:0001411|GO:0000145|GO:0000145|GO:0005934|GO:0043332|GO:0000131|GO:0005935
CAL0003853	-0.0822868	Detected	0.0822868	Detected	0	0.628493	Detected	0.571007	Detected	0.59975	0.0204748	387.958	427.872	765.195	588.555	CAL0003853	CAL0003853	CAL0003853 (alignment of 60bp with 100.00% identity) , Description: Predicted ORF in Assemblies 19, 20 and 21, Location: 1681722..1682720 in Candida albicans Ca21chr2, Gene: orf19.1350 , :: Next best Hit, CAL0005383 (alignment of 19bp with 100.00% iden	CAACGATATTGATAATGAAGATGAGGATTACACCAGAAAGACGCTTATGAACAACAACGA	CAL0003853	orf19.1350		orf19.8930|IPF19616.2|IPF19617.1|Contig4-3000_0026|CA0249|orf6.1214|orf6.979|CaO19.1350|IPF19617|CAWG_05919	Ca21chr2_C_albicans_SC5314	Has domain(s) with predicted electron carrier activity, protein disulfide oxidoreductase activity and role in cell redox homeostasis	CAL0003853	GO:0015035|GO:0009055|GO:0045454|GO:0005575	GO:0015035=protein disulfide oxidoreductase activity|GO:0009055=electron carrier activity	GO:0005575=cellular_component	GO:0045454=cell redox homeostasis	GO:0015035|GO:0009055|GO:0045454|GO:0005575
CAL0003854	-0.0997057	Compromised	0.0997066	Compromised	4.76837e-07	0.172791	Compromised	0.557331	Compromised	0.365061	0.233931	2.84673	3.21635	4.14378	4.32988	CAL0003854	CAL0003854	CAL0003854 (alignment of 60bp with 100.00% identity) , Description: Predicted ORF in Assemblies 19, 20 and 21, Location: Complement (1679940..1679200) in Candida albicans Ca21chr2, Gene: orf19.1351 , :: Next best Hit, CAL0001942 (alignment of 17bp with	GGTATTACTTTTGGTAAACATGGAAAACTTAGGACAGAGCGACTCCATTTTTACAAATGT	CAL0003854	orf19.1351		orf19.8931|IPF19017.1|IPF19081.2|CA0366|orf6.1215|orf6.978|IPF19017|CaO19.1351|CAWG_05918	Ca21chr2_C_albicans_SC5314	Ortholog of C. parapsilosis CDC317 : CPAR2_407000, Lodderomyces elongisporus NRLL YB-4239 : LELG_02401, Candida dubliniensis CD36 : CD36_22440 and Candida orthopsilosis Co 90-125 : CORT0C06360	CAL0003854	GO:0008150|GO:0003674|GO:0005575	GO:0003674=molecular_function	GO:0005575=cellular_component	GO:0008150=biological_process	GO:0003674|GO:0008150|GO:0005575
CAL0003855	-0.0640435	Detected	0.0640435	Detected	0	-0.781028	Detected	-0.76559	Detected	-0.773309	0.00688658	658.986	708.634	483.129	390.868	CAL0003855	CAL0003855	CAL0003855 (alignment of 60bp with 100.00% identity) , Description: Predicted ORF in Assemblies 19, 20 and 21, Location: 1678514..1679068 in Candida albicans Ca21chr2, Gene: orf19.1352 , :: Next best Hit, CAL0002742 (alignment of 16bp with 100.00% iden	TGGCAATTGATATGTATTTGAACAGTGATGCAGCACCACCACCAAAGAACGATTATGATA	CAL0003855	orf19.1352	TIM22	orf19.8932|IPF25985.1|IPF16416.2|IPF18964.1|Contig4-1837_0001|orf6.1463|CA0367|orf6.1216|orf19.2658|CaO19.8932|CaO19.1352|CAWG_05917	Ca21chr2_C_albicans_SC5314	Mitochondrial inner membrane protein with a predicted role in protein import; Hap43p-repressed gene; late-stage biofilm-induced gene	CAL0003855	GO:0042721|GO:0005886|GO:0045039|GO:0030943|GO:0015266	GO:0030943=mitochondrion targeting sequence binding|GO:0015266=protein channel activity	GO:0042721=mitochondrial inner membrane protein insertion complex|GO:0005886=plasma membrane	GO:0045039=protein import into mitochondrial inner membrane	GO:0030943|GO:0015266|GO:0045039|GO:0005886|GO:0042721
CAL0003856	-0.0133066	Compromised	0.0133066	Compromised	0	0.035121	Compromised	-0.191174	Compromised	-0.0780263	0.564139	6.061	6.07496	7.55342	5.16823	CAL0003856	CAL0003856	CAL0003856 (alignment of 60bp with 100.00% identity) , Description: Predicted ORF in Assemblies 19, 20 and 21; transcription downregulated upon yeast-hyphal switch; Ras1p-regulated, Location: Complement (1677182..1676646) in Candida albicans Ca21chr2, G	CACTTCCCCCTTGAATTGATTGTTGTTACAACTCCTCTTTCCTTAAAAACCAAACTTATA	CAL0003856	orf19.1353		orf19.8933|IPF25986.1|IPF11646.2|Contig4-1837_0006|Contig4-2626_0004|CA0368|orf6.1217|CaO19.8933|CaO19.1353|IPF11646	Ca21chr2_C_albicans_SC5314	Biofilm-and planktonic growth-induced gene; transcription downregulated upon yeast-hyphal switch; Ras1p-regulated; oral infection upregulated; mutants have reduced capacity to damage oral epithelial cells
CAL0003857	-0.0205321	Detected	0.0205321	Detected	0	-0.305529	Detected	-0.49726	Detected	-0.401394	0.0547989	68294.1	69140.4	67547.8	47338.5	CAL0003857	CAL0003857	CAL0003857 (alignment of 60bp with 100.00% identity) , Description: Putative protein of unknown function; mRNA binds to She3p; transcription is induced in high iron, decreased upon yeast-hyphal switch; downregulation correlates with clinical development	CATTGGAGATTGGAATTGGATGTTTCTTGTACAAATGAATCAGCTATGGTTGATGTTGAA	CAL0003857	orf19.1354	UCF1	orf19.8934|orf6.1218|IPF20056|IPF20056.1|IPF20057.1|Contig4-1837_0007|Contig4-2626_0005|YER67|orf6.1464|CA0495|orf19.2659|CaO19.1354|CaO19.8934|CAWG_05915	Ca21chr2_C_albicans_SC5314	Hap43p-repressed gene; mRNA binds She3p; transcription induced in high iron, decreased upon yeast-hyphal switch; downregulation correlates with clinical development of fluconazole resistance; Ras1p-regulated; biofilm-induced gene	CAL0003857	GO:0003674|GO:0005737|GO:0006112|GO:0016020|GO:0005634|GO:0071944	GO:0003674=molecular_function	GO:0005737=cytoplasm|GO:0016020=membrane|GO:0005634=nucleus|GO:0071944=cell periphery	GO:0006112=energy reserve metabolic process	GO:0003674|GO:0006112|GO:0005634|GO:0071944|GO:0016020|GO:0005737
CAL0003859	0.0575709	Detected	-0.0575709	Detected	0	-0.594879	Detected	-0.275102	Detected	-0.43499	0.124706	4929.79	4478.73	3779.57	3775.94	CAL0003859	CAL0003859	CAL0003859 (alignment of 60bp with 100.00% identity) , Description: Predicted ORF in Assemblies 19, 20 and 21; protein detected by mass spec in stationary phase cultures, Location: Complement (2039304..2038261) in Candida albicans Ca21chr2, Gene: orf19.	GCTGCTGGTAGAGTGAGTTGGTTTGTTGATGATGATGCATTGAATGATTTGTTTGATATA	CAL0003859	orf19.1355	SOL1	orf19.8935|IPF25953.1|IPF17111.1|Contig4-1977_0005|CA0259|orf6.1002|CaO19.8935|SOL2|CaO19.1355|SOL1|CAWG_06069	Ca21chr2_C_albicans_SC5314	Putative protein of unknown function; stationary phase enriched protein	CAL0003859	GO:0006409|GO:0005634|GO:0017057|GO:0006098|GO:0005829	GO:0017057=6-phosphogluconolactonase activity	GO:0005634=nucleus|GO:0005829=cytosol	GO:0006409=tRNA export from nucleus|GO:0006098=pentose-phosphate shunt	GO:0017057|GO:0006098|GO:0006409|GO:0005634|GO:0005829
CAL0003861	-0.029923	Detected	0.029923	Detected	0	-0.265131	Detected	-0.00827646	Detected	-0.136704	0.408789	5259.54	5394.48	5384.72	5149.96	CAL0003861	CAL0003861	CAL0003861 (alignment of 60bp with 100.00% identity) , Description: Predicted ORF in Assemblies 19, 20 and 21, Location: 2036830..2037837 in Candida albicans Ca21chr2, Gene: orf19.1356 , :: Next best Hit, CAL0003540 (alignment of 15bp with 100.00% iden	GATGGTAGTTGGACAGAATGGGCTTCAAGAGCACCTTCTGAATACATTCAAAAAGATATT	CAL0003861	orf19.1356	TUM1	orf19.8936|IPF17674.1|IPF17112.2|Contig4-1977_0002|Contig4-1977_0003|CA0258|orf6.1001|orf6.331|CaO19.1356|MST2|IPF17112|CAWG_06068	Ca21chr2_C_albicans_SC5314	Ortholog(s) have thiosulfate sulfurtransferase activity, role in tRNA wobble position uridine thiolation and mitochondrion localization	CAL0003861	GO:0005739|GO:0002143|GO:0008272|GO:0004792	GO:0004792=thiosulfate sulfurtransferase activity	GO:0005739=mitochondrion	GO:0002143=tRNA wobble position uridine thiolation|GO:0008272=sulfate transport	GO:0004792|GO:0002143|GO:0008272|GO:0005739
CAL0003863	-0.0367169	Detected	0.0367169	Detected	0	-0.907989	Detected	-0.821701	Detected	-0.864845	0.00426362	33850	35047.1	22299.8	18949.4	CAL0003863	CAL0003863	CAL0003863 (alignment of 60bp with 100.00% identity) , Description: High affinity, high capacity, hypoxanthine-adenine-guanine-cytosine/ H+ symporter; purine-cytosine permease of pyrimidine salvage; similar to S. cerevisiae Fcy2p; mutation confers resist	GTGATATTGGATTTGAACTAGCTATTGGATTTGCCTTTATTGGGTTTAATGTGGCTAGAT	CAL0003863	orf19.1357	FCY21	orf19.8937|FCY22|IPF17673.3|IPF8921.2|IPF17777.2|IPF17779.2|Contig4-1860_0007|Contig4-1860_0009|CA6188|orf6.1000|orf6.332|FCY2|FCY21.3f|CAWG_06067	Ca21chr2_C_albicans_SC5314	High affinity, high capacity, hypoxanthine-adenine-guanine-cytosine/ H+ symporter; purine-cytosine permease of pyrimidine salvage; similar to S. cerevisiae Fcy2p; mutation confers resistance to 5-fluorocytosine (5-FC); biofilm-induced gene	CAL0003863	GO:0015861|GO:0005886|GO:0015212|GO:0006863|GO:0015205|GO:0008655|GO:0015893|GO:0035690|GO:0015238|GO:0015856	GO:0015212=cytidine transmembrane transporter activity|GO:0015205=nucleobase transmembrane transporter activity|GO:0015238=drug transmembrane transporter activity	GO:0005886=plasma membrane	GO:0015861=cytidine transport|GO:0006863=purine base transport|GO:0008655=pyrimidine-containing compound salvage|GO:0015893=drug transport|GO:0035690=cellular response to drug|GO:0015856=cytosine transport	GO:0015238|GO:0015205|GO:0015205|GO:0015205|GO:0015205|GO:0015212|GO:0015893|GO:0015893|GO:0008655|GO:0006863|GO:0015856|GO:0035690|GO:0015861|GO:0005886
CAL0003865	0.0670218	Detected	-0.0670218	Detected	0	-0.0179629	Detected	-0.409287	Detected	-0.213625	0.410197	1354.99	1214.99	1539.48	939.494	CAL0003865	CAL0003865	CAL0003865 (alignment of 60bp with 100.00% identity) , Description: Predicted ORF in Assemblies 19, 20 and 21, Location: 2028114..2029865 in Candida albicans Ca21chr2, Gene: orf19.1359 , :: Next best Hit, CAL0002340 (alignment of 16bp with 100.00% iden	CCACCACCACCGACAATGATTCTAAATCTACGAAAAAACCAAAAGTTCCCAAATGGTTTA	CAL0003865	orf19.1359	UBX4	orf19.8939|IPF25938.1|IPF8915.1|Contig4-2717_0001|CA3127|orf6.5291|IPF8915|CaO19.1359|CaO19.8939|CAWG_06065	Ca21chr2_C_albicans_SC5314	Ortholog(s) have protein complex binding activity, role in ER-associated protein catabolic process, sporulation resulting in formation of a cellular spore and cytoplasm, nucleus, peripheral to membrane of membrane fraction localization	CAL0003865	GO:0005737|GO:0005634|GO:0030433|GO:0032403|GO:0030435|GO:0019898	GO:0032403=protein complex binding	GO:0005737=cytoplasm|GO:0005634=nucleus|GO:0019898=extrinsic to membrane	GO:0030433=ER-associated protein catabolic process|GO:0030435=sporulation resulting in formation of a cellular spore	GO:0032403|GO:0030435|GO:0030433|GO:0005634|GO:0019898|GO:0005737
CAL0003080	-0.0523548	Detected	0.0523548	Detected	0	0.674767	Detected	0.813724	Detected	0.744246	0.0133898	556.332	588.629	1109.79	978.116	CAL0003080	CAL0003080	CAL0003080 (alignment of 60bp with 100.00% identity) , Description: Predicted membrane transporter, member of the drug:proton antiporter (12 spanner) (DHA1) family, major facilitator superfamily (MFS), Location: Complement (250103..248010) in Candida al	GAAACGAGGAGCTTTTTTCAGAGAACATTATGATGTCATGGATTTATATGCCAAGTTGTA	CAL0003080	orf19.136	QDR3	orf19.7780|IPF16599.3|IPF7020.2|orf6.3478|orf6.459|Contig4-2900_0029|CA1816|QDR3|CaO19.136|IPF7020|CAWG_05237	Ca21chr6_C_albicans_SC5314	Predicted membrane transporter, member of the drug:proton antiporter (12 spanner) (DHA1) family, major facilitator superfamily (MFS); Hap43p-repressed gene	CAL0003080	GO:0005886|GO:0016020|GO:0006855|GO:0016021|GO:0015203|GO:0015893|GO:0015238|GO:0010509	GO:0015203=polyamine transmembrane transporter activity|GO:0015238=drug transmembrane transporter activity	GO:0005886=plasma membrane|GO:0016020=membrane|GO:0016021=integral to membrane	GO:0006855=drug transmembrane transport|GO:0015893=drug transport|GO:0010509=polyamine homeostasis	GO:0015238|GO:0015203|GO:0015893|GO:0010509|GO:0006855|GO:0016020|GO:0005886|GO:0016021
CAL0003880	-0.0116649	Detected	0.0116653	Detected	2.38419e-07	-1.13842	Compromised	-0.929019	Compromised	-1.03372	0.0102267	24.2994	24.3	13.41	12.4104	CAL0003880	CAL0003880	CAL0003880 (alignment of 60bp with 100.00% identity) , Description: Predicted ORF in Assemblies 19, 20 and 21, Location: 2027376..2027864 in Candida albicans Ca21chr2, Gene: orf19.1360 , :: Next best Hit, CAL0001356 (alignment of 16bp with 100.00% iden	CAACCATTTTGGATGAAACGAAATCGAACCATTAAATCAAAGCATAGTCATTGGAATCCA	CAL0003880	orf19.1360	RRG9	orf19.8940|IPF25969.1|IPF8914.1|Contig4-2717_0003|CA3128|orf6.5292|CaO19.8940|IPF8914|CaO19.1360|CAWG_06064	Ca21chr2_C_albicans_SC5314	Ortholog(s) have role in mitochondrial genome maintenance and mitochondrion localization	CAL0003880	GO:0005739|GO:0003674|GO:0000002	GO:0003674=molecular_function	GO:0005739=mitochondrion	GO:0000002=mitochondrial genome maintenance	GO:0003674|GO:0000002|GO:0005739
CAF0006925	0.0874901	Detected	-0.0874896	Detected	2.38419e-07	-0.612228	Detected	-0.510955	Detected	-0.561592	0.0309059	275.12	239.793	204.13	175.272	CAF0006925	CAF0006925	CAF0006925(alignment 60bp with 100.00% identity) , Description: ORF Predicted by Annotation Working Group, Location: Complement (2027115..2026933) in Candida albicans Ca21chr2, Gene: orf19.1360.1 , :: Next best hit , location within target gene 108-167	AGATGAAACTCCATCATCTTCATTTACCAGAACAAATACTACTGAAACTACTGTTGCAAG	CAF0006925	orf19.1360.1		IPF25933.1|IPF8912.1|Contig4-2717_0004|CA3129|OST4|CAWG_06063	Ca21chr2_C_albicans_SC5314	Putative adhesin-like protein	CAF0006925	GO:0008150|GO:0003674|GO:0005575	GO:0003674=molecular_function	GO:0005575=cellular_component	GO:0008150=biological_process	GO:0003674|GO:0003674|GO:0008150|GO:0008150|GO:0005575|GO:0005575
CAL0003881	0.191982	Detected	-0.191982	Detected	0	-0.0214839	Detected	0.131575	Detected	0.0550456	0.814922	28046.4	21148.5	29150	25943.8	CAL0003881	CAL0003881	CAL0003881 (alignment of 60bp with 100.00% identity) , Description: Predicted ORF in Assemblies 19, 20 and 21, Location: Complement (2026312..2025656) in Candida albicans Ca21chr2, Gene: orf19.1361 , :: Next best Hit, CAL0003242 (alignment of 18bp with	TCAGTAATGATGGCTGGTGCTGCTGGTATTTGGTGTGGTTTAAAAAGATTTTTACAAGAA	CAL0003881	orf19.1361	TIM23	orf19.8941|IPF25963.1|IPF8911.2|Contig4-2717_0005|CA3130|orf6.5293|CaO19.8941|CaO19.1361|CAWG_06062	Ca21chr2_C_albicans_SC5314	Protein involved in mitochondrial matrix protein import	CAL0003881	GO:0005744|GO:0015450|GO:0005886|GO:0030943|GO:0030150|GO:0015266	GO:0015450=P-P-bond-hydrolysis-driven protein transmembrane transporter activity|GO:0030943=mitochondrion targeting sequence binding|GO:0015266=protein channel activity	GO:0005744=mitochondrial inner membrane presequence translocase complex|GO:0005886=plasma membrane	GO:0030150=protein import into mitochondrial matrix	GO:0015450|GO:0030943|GO:0015266|GO:0030150|GO:0005886|GO:0005744
CAL0003882	0.0381961	Detected	-0.0381961	Detected	0	-0.681753	Detected	-0.357928	Detected	-0.51984	0.0889567	7917.38	7388.77	5792.63	5803.33	CAL0003882	CAL0003882	CAL0003882 (alignment of 60bp with 100.00% identity) , Description: Predicted ORF in Assemblies 19, 20 and 21; transcription is upregulated in both intermediate and mature biofilms, Location: 2024187..2025488 in Candida albicans Ca21chr2, Gene: orf19.13	AAGATGGCAAAAAGCCAAACTCAACCCCTGTCAAGTATAGAAAACCCCATCAAAGTAACT	CAL0003882	orf19.1362	SMM1	orf19.8942|IPF25948.1|IPF8910.2|Contig4-2717_0007|CA3131|orf6.5294|CaO19.8942|CaO19.1362|IPF8910|CAWG_06061	Ca21chr2_C_albicans_SC5314	Putative dihydrouridine synthase; Hap43p-induced gene; transcription is upregulated in both intermediate and mature biofilms	CAL0003882	GO:0005737|GO:0050660|GO:0017150|GO:0005634|GO:0006400|GO:0055114	GO:0050660=flavin adenine dinucleotide binding|GO:0017150=tRNA dihydrouridine synthase activity	GO:0005737=cytoplasm|GO:0005634=nucleus	GO:0006400=tRNA modification|GO:0055114=oxidation-reduction process	GO:0050660|GO:0017150|GO:0006400|GO:0055114|GO:0005634|GO:0005737
CAL0003883	-0.171752	Detected	0.171752	Detected	0	0.0887408	Detected	0.396146	Detected	0.242444	0.403192	2132.88	2662.93	3078.96	3049.74	CAL0003883	CAL0003883	CAL0003883 (alignment of 60bp with 100.00% identity) , Description: Predicted ORF in Assemblies 19, 20 and 21; Plc1p-regulated; transcriptionally activated by Mnl1p under weak acid stress, Location: Complement (2021601..2020423) in Candida albicans Ca21	GGCTTGTAGAATTGATGTTAATAAGGCAAGTCGATTATTTGCTGCATTTGAAAAAGTTGG	CAL0003883	orf19.1363	YOR338W	orf19.8943|IPF25951.1|IPF8904.2|Contig4-2717_0017|CA3132|orf6.5295|CaO19.8943|CaO19.1363|IPF8904|CAWG_06060	Ca21chr2_C_albicans_SC5314	Putative protein of unknown function; late-stage biofilm-induced gene; Plc1p-regulated; transcriptionally activated by Mnl1p under weak acid stress	CAL0003883	GO:0030437|GO:0003674|GO:0045944|GO:0005575	GO:0003674=molecular_function	GO:0005575=cellular_component	GO:0030437=ascospore formation|GO:0045944=positive regulation of transcription from RNA polymerase II promoter	GO:0003674|GO:0030437|GO:0045944|GO:0005575
CAL0003884	-0.142978	Detected	0.142978	Detected	0	0.222017	Detected	0.244915	Detected	0.233466	0.24513	4819.17	5781.51	7479.41	6082.48	CAL0003884	CAL0003884	CAL0003884 (alignment of 60bp with 100.00% identity) , Description: Predicted ORF in Assemblies 19, 20 and 21; constitutive expression independent of MTL or white-opaque status, Location: 2018811..2019848 in Candida albicans Ca21chr2, Gene: orf19.1364 ,	TTGCAGTGCCTTATTATATTTGGGTGCAAGAATTCCCCAAATTATTCAAAATCATCAACG	CAL0003884	orf19.1364		orf19.8944|IPF25957.1|IPF16939.2|Contig4-1729_0001|CA3133|orf6.5296|YBR147w|CaO19.1364|CaO19.8944|IPF16939|CAWG_06059	Ca21chr2_C_albicans_SC5314	Hap43p-repressed gene; constitutive expression independent of MTL or white-opaque status	CAL0003884	GO:0008150|GO:0003674|GO:0005575	GO:0003674=molecular_function	GO:0005575=cellular_component	GO:0008150=biological_process	GO:0003674|GO:0008150|GO:0005575
CAL0003885	-0.0819545	Detected	0.081955	Detected	2.38419e-07	0.584487	Detected	0.294524	Detected	0.439506	0.118584	220.088	242.619	420.955	275.593	CAL0003885	CAL0003885	CAL0003885 (alignment of 60bp with 100.00% identity) , Description: Predicted ORF in Assemblies 19, 20 and 21; mutation confers hypersensitivity to toxic ergosterol analog; constitutive expression independent of MTL or white-opaque status, Location: Comp	ATGGGTTTTTGAGACCTGATCATCCTGCTTATAATTTAAGATGGAAAGCTGAGGAATCTA	CAL0003885	orf19.1365		orf19.8945|IPF25944.1|IPF19972.1|Contig4-2532_0001|Contig4-1729_0002|CA3134|orf6.5297|CaO19.8945|CaO19.1365|SOX1|IFZ2|IPF11499.repeat2|CAWG_06058	Ca21chr2_C_albicans_SC5314	Putative monooxygenase; mutation confers hypersensitivity to toxic ergosterol analog; constitutive expression independent of MTL or white-opaque status	CAL0003885	GO:0004497|GO:0005575|GO:0016705|GO:0035690|GO:0055114	GO:0004497=monooxygenase activity|GO:0016705=oxidoreductase activity, acting on paired donors, with incorporation or reduction of molecular oxygen	GO:0005575=cellular_component	GO:0035690=cellular response to drug|GO:0055114=oxidation-reduction process	GO:0004497|GO:0016705|GO:0035690|GO:0055114|GO:0005575
CAL0003886	-1.76501	Compromised	1.76501	Detected	2.38419e-07	-0.557908	Detected	-1.11129	Compromised	-0.834598	0.686343	7.20531	81.9	20.0469	10.9341	CAL0003886	CAL0003886	CAL0003886 (alignment of 60bp with 100.00% identity) , Description: Predicted ORF in Assemblies 19, 20 and 21, Location: Complement (2015586..2014327) in Candida albicans Ca21chr2, Gene: orf19.1366 , :: Next best Hit, CAL0006189 (alignment of 16bp with	GATGGCATCAAGCAGAAACTGATTTTAGTTTAGAAGAAGCCGAGAAAAAATTTCAAGTCA	CAL0003886	orf19.1366		orf19.8946|IPF25949.1|IPF8990.1|Contig4-2532_0003|CA3135|orf6.5298|CaO19.1366|CaO19.8946|IPF8990|CAWG_06057	Ca21chr2_C_albicans_SC5314	Has domain(s) with predicted oxidoreductase activity, acting on paired donors, with incorporation or reduction of molecular oxygen, 2-oxoglutarate as one donor, and incorporation of one atom each of oxygen into both donors activity	CAL0003886	GO:0016706|GO:0005575|GO:0055114	GO:0016706=oxidoreductase activity, acting on paired donors, with incorporation or reduction of molecular oxygen, 2-oxoglutarate as one donor, and incorporation of one atom each of oxygen into both donors	GO:0005575=cellular_component	GO:0055114=oxidation-reduction process	GO:0016706|GO:0055114|GO:0005575
CAL0003887	0.0893674	Detected	-0.0893669	Detected	2.38419e-07	-0.0877132	Detected	-0.0240917	Detected	-0.0559025	0.61535	205.324	178.494	218.854	183.074	CAL0003887	CAL0003887	CAL0003887 (alignment of 60bp with 100.00% identity) , Description: Kinetochore component; amount of Nuf2p and Mtw1p protein detected at each centromere is consistent with a single kinetochore microtubule attachment site, Location: 2013271..2014215 in C	CAAAATCAAGACGACATTGATATGATAATACCAGAACAAGACGATATAGATGTGGATGCA	CAL0003887	orf19.1367	MTW1	orf19.8947|IPF25955.1|IPF8989.1|Contig4-2532_0004|CA3136|orf6.5299|CaO19.8947|CaO19.1367|IPF8989|CAWG_06056	Ca21chr2_C_albicans_SC5314	Kinetochore component; amount of Nuf2p and Mtw1p protein detected at each centromere is consistent with a single kinetochore microtubule attachment site	CAL0003887	GO:0051653|GO:0003674|GO:0000070|GO:0000818|GO:0000022|GO:0005816|GO:0034501|GO:0000776|GO:0007052|GO:0031617|GO:0019236|GO:0000939	GO:0003674=molecular_function	GO:0000818=nuclear MIS12/MIND type complex|GO:0005816=spindle pole body|GO:0000776=kinetochore|GO:0031617=NMS complex|GO:0000939=condensed chromosome inner kinetochore	GO:0051653=spindle localization|GO:0000070=mitotic sister chromatid segregation|GO:0000022=mitotic spindle elongation|GO:0034501=protein localization to kinetochore|GO:0007052=mitotic spindle organization|GO:0019236=response to pheromone	GO:0003674|GO:0034501|GO:0007052|GO:0051653|GO:0000070|GO:0000022|GO:0019236|GO:0000776|GO:0000776|GO:0005816|GO:0000939|GO:0031617|GO:0000818
CAL0120518	3.29018e-05	Detected	-3.29018e-05	Detected	0	-0.359247	Detected	-0.44389	Detected	-0.401568	0.0109256	774.694	762.251	727.775	549.334	CAL0120518	CAL0120518	CAL0120518 (alignment of 60bp with 100.00% identity) , Description: ORF added to Assembly 21 based on comparative genome analysis, Location: Complement (2012969..2012727) in Candida albicans Ca21chr2, Gene: orf19.1367.1 , :: Next best Hit, CAL0001001 (a	ATTTTATGTTGCCTATGGAAATGAAGGTAAAGTTAGTATTACTGATAGATTTAGAAAAAA	CAL0120518	orf19.1367.1			Ca21chr2_C_albicans_SC5314	Ortholog of C. parapsilosis CDC317 : CPAR2_407330, Candida tenuis NRRL Y-1498 : CANTEDRAFT_114646, Debaryomyces hansenii CBS767 : DEHA2B05654g and Pichia stipitis Pignal : PICST_44644	CAL0120518	GO:0008150|GO:0003674|GO:0005575	GO:0003674=molecular_function	GO:0005575=cellular_component	GO:0008150=biological_process	GO:0003674|GO:0008150|GO:0005575
CAL0003888	-0.174607	Detected	0.174607	Detected	0	1.34763	Detected	1.00354	Detected	1.17559	0.0408338	627.644	786.729	2172.57	1369.98	CAL0003888	CAL0003888	CAL0003888 (alignment of 60bp with 100.00% identity) , Description: Predicted ORF in Assemblies 19, 20 and 21, Location: 2009389..2011215 in Candida albicans Ca21chr2, Gene: orf19.1368 , :: Next best Hit, CAL0002132 (alignment of 16bp with 100.00% iden	GAGTTGTTGCAAAATCTTGAATCTGGATTGGTGGAGTTCAAACTTGAATTGAACAAGAAT	CAL0003888	orf19.1368		orf19.8948|IPF25936.1|IPF8985.3|Contig4-2532_0008|CA0045|orf6.291|orf6.5300|CaO19.1368|IPF8985|IPF8985.5eoc|IPF8985.2|CAWG_06055	Ca21chr2_C_albicans_SC5314	Biofilm-induced gene	CAL0003888	GO:0008150|GO:0003674|GO:0005575	GO:0003674=molecular_function	GO:0005575=cellular_component	GO:0008150=biological_process	GO:0003674|GO:0008150|GO:0005575
CAL0003889	-0.0882106	Detected	0.0882106	Detected	0	0.943058	Detected	0.640169	Detected	0.791613	0.0456842	315.559	350.894	777.221	504.296	CAL0003889	CAL0003889	CAL0003889 (alignment of 60bp with 100.00% identity) , Description: Predicted ORF in Assemblies 19, 20 and 21, Location: Complement (2004475..2003171) in Candida albicans Ca21chr2, Gene: orf19.1369 , :: Next best Hit, CAL0000166 (alignment of 17bp with	CGAGGAATATTCTTCACCGGAAGAAGTTGAAAATGGATTTCAAGTATTACTAAGATCAGT	CAL0003889	orf19.1369		orf19.8949|IPF8976.2|IPF19035.2|Contig4-2176_0002|CA3137|orf6.1149|orf6.5301|PYD3|CaO19.1369|IPF8976|CAWG_06054	Ca21chr2_C_albicans_SC5314	Hap43p-repressed gene	CAL0003889	GO:0008152|GO:0016813|GO:0005575	GO:0016813=hydrolase activity, acting on carbon-nitrogen (but not peptide) bonds, in linear amidines	GO:0005575=cellular_component	GO:0008152=metabolic process	GO:0016813|GO:0008152|GO:0005575
CAL0003081	0.0330462	Detected	-0.0330462	Detected	0	0.437554	Detected	0.451667	Detected	0.444611	0.00572673	1002.6	942.363	1599.25	1292.66	CAL0003081	CAL0003081	CAL0003081 (alignment of 60bp with 100.00% identity) , Description: Predicted ORF in Assemblies 19, 20 and 21; transcription is induced in response to alpha pheromone in SpiderM medium, Location: 251684..252925 in Candida albicans Ca21chr6, Gene: orf19.	ATTGCGTCGAGAGGATTACCACCTTTAAAACATGTATTATTACCTCGTATTAGAGGATTA	CAL0003081	orf19.137	CST26	orf19.7781|IPF16598.2|IPF29952.1|orf6.3477|orf6.458|CA0086|IPF16598|CaO19.137|CAWG_05236	Ca21chr6_C_albicans_SC5314	Planktonic growth-induced gene; transcription is induced in response to alpha pheromone in SpiderM medium	CAL0003081	GO:0005811|GO:0016746|GO:0005783|GO:0008152	GO:0016746=transferase activity, transferring acyl groups	GO:0005811=lipid particle|GO:0005783=endoplasmic reticulum	GO:0008152=metabolic process	GO:0016746|GO:0008152|GO:0005783|GO:0005811
CAL0003906	-0.234627	Compromised	0.234627	Compromised	0	2.62575	Detected	0.794029	Compromised	1.70989	0.212243	3.65654	4.98101	32	7.19561	CAL0003906	CAL0003906	CAL0003906 (alignment of 60bp with 100.00% identity) , Description: Predicted ORF in Assemblies 19, 20 and 21; expression is regulated upon white-opaque switching; transcription is repressed in response to alpha pheromone in SpiderM medium, Location: Com	ATTGGCTGTGTCTATTGTTGATGATTTACTCACAACTTCTGATGGACAAAACTTTGTTGT	CAL0003906	orf19.1370		orf19.8950|IPF18486.2|IPF9867.2|Contig4-1943_0002|CA0337|orf6.1148|orf6.4156|CaO19.1370|IPF9867|CAWG_06053	Ca21chr2_C_albicans_SC5314	Predicted ORF in Assemblies 19, 20 and 21; expression is regulated upon white-opaque switching; transcription is repressed in response to alpha pheromone in SpiderM medium	CAL0003906	GO:0008150|GO:0003674|GO:0005575	GO:0003674=molecular_function	GO:0005575=cellular_component	GO:0008150=biological_process	GO:0003674|GO:0008150|GO:0005575
CAL0003907	-0.0305886	Detected	0.0305886	Detected	0	0.357625	Detected	0.401731	Detected	0.379678	0.00972083	752.315	772.331	1186.55	979.223	CAL0003907	CAL0003907	CAL0003907 (alignment of 60bp with 100.00% identity) , Description: Predicted ORF in Assemblies 19, 20 and 21, Location: 1999481..2000998 in Candida albicans Ca21chr2, Gene: orf19.1371 , :: Next best Hit, CAL0004884 (alignment of 16bp with 100.00% iden	CAGTCACCTTGAAGAATTCAATCTTGGAAGTACTAAAGACTTTTAATCTTGAAGGGAAAC	CAL0003907	orf19.1371		orf19.8951|IPF25945.1|IPF9869.2|CA0336|orf6.1147|orf6.4157|CaO19.1371|IPF9869|CAWG_06052	Ca21chr2_C_albicans_SC5314	Ortholog of C. parapsilosis CDC317 : CPAR2_806590, Candida tenuis NRRL Y-1498 : CANTEDRAFT_92769, Debaryomyces hansenii CBS767 : DEHA2B13376g and Candida dubliniensis CD36 : CD36_23880	CAL0003907	GO:0008150|GO:0003674|GO:0005575	GO:0003674=molecular_function	GO:0005575=cellular_component	GO:0008150=biological_process	GO:0003674|GO:0008150|GO:0005575
CAL0003908	0.153865	Detected	-0.153865	Detected	0	-0.357811	Detected	-0.292437	Detected	-0.325124	0.174694	5170	4110	4370	3660	CAL0003908	CAL0003908	NOTE: Has potential for cross hybridization with other orfs; CAL0003908 (alignment 60 bp with 100 % identity) , Description: Gene transcription regulated by Mig1p and Tup1p, Location: Complement (1998958..1998239) in Candida albicans Ca21chr2, Gene: orf1	GAAATTTGGGGTAAACAATATTTCAAAGGTGTTGCTCCAGTTAAGGCTAAGAAAGTATCT	CAL0003908	orf19.1372	IRC22	orf19.8952|orf6.1146|IPF9870.2|Contig4-2586_0007|CA6249|orf6.4158|orf6.530|CaO19.1372|IPF9870|CAWG_06072	Ca21chr2_C_albicans_SC5314	Gene transcription regulated by Mig1p and Tup1p	CAL0003908	GO:0008150|GO:0003674|GO:0005783	GO:0003674=molecular_function	GO:0005783=endoplasmic reticulum	GO:0008150=biological_process	GO:0003674|GO:0008150|GO:0005783
CAL0003909	-0.144229	Detected	0.144229	Detected	0	0.784312	Detected	0.704945	Detected	0.744628	0.0380676	496.651	596.862	1139.18	863.017	CAL0003909	CAL0003909	CAL0003909 (alignment of 60bp with 100.00% identity) , Description: Putative phosphatidylinositol-4,5-bisphosphate phosphatase; involved in maintenance of phosphoinositide levels; affects hyphal growth, virulence, cell integrity; interacts with Irs4p, Lo	GGCGACCAATAAATCCATTTGAGAAAAGTAACGAGCCTGAGTTTGTTTCTAAAAATGATT	CAL0003909	orf19.1373	INP51	orf19.8953|IPF9874.2|IPF9872.3|Contig4-2586_0004|Contig4-2586_0005|CA2308|orf6.1145|orf6.4159|CaO19.1373|IPF9874.3|CAWG_06050	Ca21chr2_C_albicans_SC5314	Putative phosphatidylinositol-4,5-bisphosphate phosphatase; involved in maintenance of phosphoinositide levels; affects hyphal growth, virulence, cell integrity; interacts with Irs4p	CAL0003909	GO:0004439|GO:0005737|GO:0036244|GO:0030447|GO:0016020|GO:0031505|GO:0046856|GO:0009405|GO:0036178	GO:0004439=phosphatidylinositol-4,5-bisphosphate 5-phosphatase activity	GO:0005737=cytoplasm|GO:0016020=membrane	GO:0036244=cellular response to neutral pH|GO:0030447=filamentous growth|GO:0031505=fungal-type cell wall organization|GO:0046856=phosphatidylinositol dephosphorylation|GO:0009405=pathogenesis|GO:0036178=filamentous growth of a population of unicellular organisms in response to neutral pH	GO:0004439|GO:0046856|GO:0031505|GO:0009405|GO:0030447|GO:0036244|GO:0036178|GO:0016020|GO:0005737
CAL0003910	0.0299225	Detected	-0.0299225	Detected	0	-0.202891	Detected	-0.142303	Detected	-0.172597	0.0558154	900.801	850.357	923.774	771.124	CAL0003910	CAL0003910	CAL0003910 (alignment of 60bp with 100.00% identity) , Description: Predicted ORF in Assemblies 19, 20 and 21; possibly spurious ORF (Annotation Working Group prediction), Location: 1994421..1994993 in Candida albicans Ca21chr2, Gene: orf19.1374 , :: Ne	AACGAAAAACTAACTACAGATGATGAGCCAATTGTTCCCACAACCAAATCTGATGAATAA	CAL0003910	orf19.1374		orf19.8954|IPF25965.1|IPF9875.2|Contig4-2586_0002|CA2309|orf6.4160|CaO19.1374|CaO19.8954|IPF9875|CAWG_06049	Ca21chr2_C_albicans_SC5314	Ortholog of Candida tenuis NRRL Y-1498 : CANTEDRAFT_104074, Debaryomyces hansenii CBS767 : DEHA2B13310g, Candida dubliniensis CD36 : CD36_23840 and Pichia stipitis Pignal : PICST_58235	CAL0003910	GO:0008150|GO:0003674|GO:0005575	GO:0003674=molecular_function	GO:0005575=cellular_component	GO:0008150=biological_process	GO:0003674|GO:0008150|GO:0005575
CAL0003911	-0.154937	Detected	0.154937	Detected	0	0.939373	Detected	0.543673	Detected	0.741523	0.0982192	10124.3	12349.1	26050	15849.3	CAL0003911	CAL0003911	CAL0003911 (alignment of 60bp with 100.00% identity) , Description: Putative alpha-isopropylmalate synthase; fungal-specific (no human/murine homolog); upregulated in the presence of human blood or polymorphonuclear cells; regulated by Gcn2p and Gcn4p; d	GGGGTGTGGGTATTCATACTGATGTTTCTCAAGCTTCATTCTTATCTTTGATATCTATTT	CAL0003911	orf19.1375	LEU42	orf19.8955|IPF25939.1|IPF9877.2|Contig4-2586_0001|LEU6|CA2310|orf6.4161|CaO19.1375|CaO19.8955|CAWG_06048	Ca21chr2_C_albicans_SC5314	Putative alpha-isopropylmalate synthase; fungal-specific (no human/murine homolog); upregulated in the presence of human blood or polymorphonuclear cells; regulated by Gcn2p and Gcn4p; stationary phase enriched protein	CAL0003911	GO:0005739|GO:0009098|GO:0003852	GO:0003852=2-isopropylmalate synthase activity	GO:0005739=mitochondrion	GO:0009098=leucine biosynthetic process	GO:0003852|GO:0009098|GO:0005739
CAL0003912	0.0268984	Detected	-0.0268984	Detected	0	-0.0928001	Detected	0.0183287	Detected	-0.0372357	0.607683	9262.44	8780.48	10273.4	8881.49	CAL0003912	CAL0003912	CAL0003912 (alignment of 60bp with 100.00% identity) , Description: Predicted ORF in Assemblies 19, 20 and 21, Location: 1989931..1990818 in Candida albicans Ca21chr2, Gene: orf19.1376 , :: Next best Hit, CAL0000075 (alignment of 16bp with 100.00% iden	CGTAAAAAGTGCCAAATCCGCCAGAAAGAAGAAATTATGGTGTTTTTTCATTTGTCTTCT	CAL0003912	orf19.1376	SSO2	orf19.8956|IPF25959.1|IPF16993.2|Contig4-2434_0002|Contig4-2434_0003|CA2311|orf6.4162|CaO19.1376|SSO2|CaO19.8956|CAWG_06047	Ca21chr2_C_albicans_SC5314	Ortholog(s) have SNAP receptor activity, phosphatidic acid binding activity and role in ascospore-type prospore membrane assembly	CAL0003912	GO:0032120|GO:0005484|GO:0070300|GO:0005794|GO:0005886|GO:0005783|GO:0016192|GO:0005628|GO:0006886	GO:0005484=SNAP receptor activity|GO:0070300=phosphatidic acid binding	GO:0005794=Golgi apparatus|GO:0005886=plasma membrane|GO:0005783=endoplasmic reticulum|GO:0005628=prospore membrane	GO:0032120=ascospore-type prospore membrane assembly|GO:0016192=vesicle-mediated transport|GO:0006886=intracellular protein transport	GO:0005484|GO:0070300|GO:0032120|GO:0006886|GO:0016192|GO:0005783|GO:0005794|GO:0005886|GO:0005628
CAL0003913	0.0726938	Detected	-0.0726938	Detected	0	0.440296	Detected	0.194212	Detected	0.317254	0.156602	881.022	783.805	1369.83	924.502	CAL0003913	CAL0003913	CAL0003913 (alignment of 60bp with 100.00% identity) , Description: Predicted ORF in Assemblies 19, 20 and 21; moderately induced at 42 deg, Location: Complement (1989007..1987955) in Candida albicans Ca21chr2, Gene: orf19.1377 , :: Next best Hit, CAL00	GAAGGTCAAGGACACGACGAAAACATTGTTCAAGGAATTGAGAATTTGATTGATATATTC	CAL0003913	orf19.1377	IPK2	orf19.8957|IPF25956.1|IPF16498.2|Contig4-2434_0006|CA2312|orf6.4163|CaO19.8957|ARG82|CaO19.1377|IPF16498|CAWG_06046	Ca21chr2_C_albicans_SC5314	Putative inositol polyphosphate multikinase; moderately induced at 42 deg	CAL0003913	GO:0000825|GO:0000824|GO:0000827|GO:0008440|GO:0050821|GO:0005634|GO:0000122|GO:0000821|GO:0000823|GO:0005829|GO:0046854|GO:0032958|GO:0045944|GO:0035004|GO:0030674	GO:0000825=inositol tetrakisphosphate 6-kinase activity|GO:0000824=inositol tetrakisphosphate 3-kinase activity|GO:0000827=inositol-1,3,4,5,6-pentakisphosphate kinase activity|GO:0008440=inositol-1,4,5-trisphosphate 3-kinase activity|GO:0000823=inositol-1,4,5-trisphosphate 6-kinase activity|GO:0035004=phosphatidylinositol 3-kinase activity|GO:0030674=protein binding, bridging	GO:0005634=nucleus|GO:0005829=cytosol	GO:0050821=protein stabilization|GO:0000122=negative regulation of transcription from RNA polymerase II promoter|GO:0000821=regulation of arginine metabolic process|GO:0046854=phosphatidylinositol phosphorylation|GO:0032958=inositol phosphate biosynthetic process|GO:0045944=positive regulation of transcription from RNA polymerase II promoter	GO:0000823|GO:0030674|GO:0000825|GO:0000827|GO:0008440|GO:0035004|GO:0000824|GO:0000122|GO:0045944|GO:0000821|GO:0050821|GO:0032958|GO:0046854|GO:0005634|GO:0005829
CAL0003914	0.0550437	Detected	-0.0550437	Detected	0	-0.0455842	Detected	-0.0925593	Detected	-0.0690718	0.367719	36744.2	33499.4	41297	31996.1	CAL0003914	CAL0003914	CAL0003914 (alignment of 60bp with 100.00% identity) , Description: Translation factor eRF3; shows prion-like aggregation in some, not all, studies; partially complements S. cerevisiae sup35 mutant translation defect; species barrier with S. cerevisiae S	TTTACTTTGAGAGATCAAGGTACAACCATTGCCATCGGTAAGATTACCAAATTGTTGTAA	CAL0003914	orf19.1378	SUP35	orf19.8958|IPF25930.1|IPF19754.1|Contig4-2434_0007|CA2313|orf6.4164|ERF3|CaO19.1378|CaO19.8958|CAWG_06045	Ca21chr2_C_albicans_SC5314	Translation factor eRF3; shows prion-like aggregation in some, not all, studies; partially complements S. cerevisiae sup35 mutant translation defect; species barrier with S. cerevisiae Sup35p prion; gene not regulated by yeast-hyphal switch	CAL0003914	GO:0022626|GO:0046982|GO:0003924|GO:0018444|GO:0006415|GO:0005525|GO:0003747|GO:0000288	GO:0046982=protein heterodimerization activity|GO:0003924=GTPase activity|GO:0005525=GTP binding|GO:0003747=translation release factor activity	GO:0022626=cytosolic ribosome|GO:0018444=translation release factor complex	GO:0006415=translational termination|GO:0000288=nuclear-transcribed mRNA catabolic process, deadenylation-dependent decay	GO:0003747|GO:0005525|GO:0003747|GO:0003924|GO:0046982|GO:0006415|GO:0000288|GO:0022626|GO:0018444
CAL0003084	-0.102672	Compromised	0.102671	Compromised	-4.76837e-07	0.483379	Compromised	3.50523	Detected	1.99431	0.318525	2.5764	2.92291	4.66072	30.3	CAL0003084	CAL0003084	CAL0003084 (alignment of 60bp with 100.00% identity) , Description: Probable ortholog of S. cerevisiae Fig1p, which is an integral membrane protein required for mating; role in thigmotropism; transcription is opaque-specific, a-specific, and activated by	TGGGGATTAGGATCAATGTTACAACATCAAGCTGTTGTTACATCAGTGGAAATGATGCAG	CAL0003084	orf19.138	FIG1	orf19.7782|orf6.3476|IPF27175.1|IPF18606.1|CA1815|CaO19.7782|CaO19.138|IPF18606|CAWG_05235	Ca21chr6_C_albicans_SC5314	Probable ortholog of S. cerevisiae Fig1p, which is an integral membrane protein required for mating; role in thigmotropism; transcription is opaque-specific, a-specific, and activated by Cph1p or alpha pheromone	CAL0003084	GO:0043332|GO:0003674|GO:0070509|GO:0070250|GO:0009277|GO:0000753|GO:0000755	GO:0003674=molecular_function	GO:0043332=mating projection tip|GO:0070250=mating projection membrane|GO:0009277=fungal-type cell wall	GO:0070509=calcium ion import|GO:0000753=cell morphogenesis involved in conjugation with cellular fusion|GO:0000755=cytogamy	GO:0003674|GO:0070509|GO:0000753|GO:0000755|GO:0070250|GO:0009277|GO:0043332
CAL0003939	-0.0815968	Detected	0.0815968	Detected	0	1.634	Detected	0.805482	Detected	1.21974	0.101845	4842.06	5335.11	19164.5	8637.9	CAL0003939	CAL0003939	CAL0003939 (alignment of 60bp with 100.00% identity) , Description: Predicted ORF in Assemblies 19, 20 and 21, Location: Complement (1985123..1983729) in Candida albicans Ca21chr2, Gene: orf19.1381 , :: Next best Hit, CAL0002641 (alignment of 16bp with	TCAATTGAAGGCAATCCTTTTGGTGATAGAAACGCTGTAACGAAATCCGTATATGATTGA	CAL0003939	orf19.1381	LSB5	orf19.8961|IPF25947.1|IPF14545.2|CA2314|orf6.4167|LSB5|CaO19.1381|IPF14545|CaO19.8961|CAWG_06044	Ca21chr2_C_albicans_SC5314	Ortholog(s) have role in actin cortical patch localization, actin filament organization, endocytosis and actin cortical patch, spindle pole body localization	CAL0003939	GO:0003674|GO:0005816|GO:0030479|GO:0051666|GO:0007015|GO:0006886|GO:0006897	GO:0003674=molecular_function	GO:0005816=spindle pole body|GO:0030479=actin cortical patch	GO:0051666=actin cortical patch localization|GO:0007015=actin filament organization|GO:0006886=intracellular protein transport|GO:0006897=endocytosis	GO:0003674|GO:0007015|GO:0006897|GO:0051666|GO:0006886|GO:0030479|GO:0005816
CAL0003940	-0.0300932	Detected	0.0300932	Detected	0	0.690304	Detected	0.516931	Detected	0.603617	0.0223384	1139.88	1169.41	2263.3	1606.47	CAL0003940	CAL0003940	CAL0003940 (alignment of 60bp with 100.00% identity) , Description: Protein similar to S. cerevisiae Yea4p; transcription is induced in response to alpha pheromone in SpiderM medium, Location: 1982716..1983696 in Candida albicans Ca21chr2, Gene: orf19.1	GGCAGTGCAGCATATTACAGCATTAGTGGGATTTCTGATAGAAAAATTATGGAATTAAAG	CAL0003940	orf19.1382	YEA4	orf19.8962|IPF14544.2|IPF12389.2|Contig4-2576_0001|CA2315|orf6.2082|orf6.4168|CaO19.1382|CAWG_06043	Ca21chr2_C_albicans_SC5314	Protein similar to S. cerevisiae Yea4p; transcription is induced in response to alpha pheromone in SpiderM medium	CAL0003940	GO:0034221|GO:0051286|GO:0005783|GO:0015786|GO:0005462|GO:0016021|GO:0015788	GO:0005462=UDP-N-acetylglucosamine transmembrane transporter activity	GO:0051286=cell tip|GO:0005783=endoplasmic reticulum|GO:0016021=integral to membrane	GO:0034221=fungal-type cell wall chitin biosynthetic process|GO:0015786=UDP-glucose transport|GO:0015788=UDP-N-acetylglucosamine transport	GO:0005462|GO:0015788|GO:0015786|GO:0034221|GO:0051286|GO:0005783|GO:0016021
CAL0003941	-0.0629611	Detected	0.0629611	Detected	0	0.178016	Detected	0.339988	Detected	0.259002	0.127537	2453.85	2634.77	3494.71	3129.6	CAL0003941	CAL0003941	CAL0003941 (alignment of 60bp with 100.00% identity) , Description: Predicted ORF in Assemblies 19, 20 and 21; transcription is induced in response to alpha pheromone in SpiderM medium, Location: Complement (1982337..1980394) in Candida albicans Ca21chr	ACGAAAGAGGGTATTAAGCACATGAACTCGTTGTCACTTCTCAGAACGTATGTGCTGTGA	CAL0003941	orf19.1383		orf19.8963|IPF12388.1|IPF14542.1|IPF12387.1|Contig4-2576_0002|Contig4-1457_0003|Contig4-1457_0005|CA6254|CA2316|orf6.2081|orf6.2080|orf6.4169|orf19.1384|CaO19.1383|IPF14542.5f|CAWG_06042	Ca21chr2_C_albicans_SC5314	Predicted ORF in Assemblies 19, 20 and 21; transcription is induced in response to alpha pheromone in SpiderM medium	CAL0003941	GO:0008150|GO:0003674|GO:0005575	GO:0003674=molecular_function	GO:0005575=cellular_component	GO:0008150=biological_process	GO:0003674|GO:0008150|GO:0005575
CAL0003943	0.0179043	Detected	-0.0179043	Detected	0	-0.215256	Detected	-0.0220556	Detected	-0.118656	0.350584	3297.59	3165.22	3380.87	3093.91	CAL0003943	CAL0003943	CAL0003943 (alignment of 60bp with 100.00% identity) , Description: Predicted ORF in Assemblies 19, 20 and 21, Location: 1979774..1980226 in Candida albicans Ca21chr2, Gene: orf19.1386 , :: Next best Hit, CAL0005353 (alignment of 14bp with 100.00% iden	CTTGGAAAATGTGGGGCATGGTATTTTTGATTGTATTCCTATGGTTTTTCTATGTTTGGT	CAL0003943	orf19.1386	BET1	orf19.8964|IPF25970.1|IPF12385.1|Contig4-2576_0003|CA0888|orf6.2078|CaO19.1386|BET1|CAWG_06041	Ca21chr2_C_albicans_SC5314	Ortholog(s) have SNAP receptor activity and role in ER to Golgi vesicle-mediated transport, retrograde vesicle-mediated transport, Golgi to ER, vesicle fusion	CAL0003943	GO:0006888|GO:0030134|GO:0005484|GO:0005794|GO:0006890|GO:0005789|GO:0031201|GO:0000329|GO:0016021|GO:0006906	GO:0005484=SNAP receptor activity	GO:0030134=ER to Golgi transport vesicle|GO:0005794=Golgi apparatus|GO:0005789=endoplasmic reticulum membrane|GO:0031201=SNARE complex|GO:0000329=fungal-type vacuole membrane|GO:0016021=integral to membrane	GO:0006888=ER to Golgi vesicle-mediated transport|GO:0006890=retrograde vesicle-mediated transport, Golgi to ER|GO:0006906=vesicle fusion	GO:0005484|GO:0006906|GO:0006888|GO:0006890|GO:0030134|GO:0000329|GO:0005794|GO:0031201|GO:0016021|GO:0005789
CAL0003944	0.100522	Detected	-0.100522	Detected	0	-0.00702476	Detected	-0.312007	Detected	-0.159516	0.474553	1524.01	1304.53	1704.64	1104.45	CAL0003944	CAL0003944	CAL0003944 (alignment of 60bp with 100.00% identity) , Description: Predicted ORF in Assemblies 19, 20 and 21, Location: Complement (1979358..1978474) in Candida albicans Ca21chr2, Gene: orf19.1387 , :: Next best Hit, CAL0002159 (alignment of 16bp with	CGATCCTCAATTTGTTGAATTAGTGGAGTTGCAGAATGAGCAAGAAAACAAAAAGTTGAT	CAL0003944	orf19.1387	CFD1	orf19.8965|IPF25954.1|IPF12383.2|Contig4-2576_0004|CA0887|orf6.2077|CaO19.1387|CaO19.8965|IPF12383|CAWG_06040	Ca21chr2_C_albicans_SC5314	Ortholog(s) have 4 iron, 4 sulfur cluster binding activity, role in iron-sulfur cluster assembly, tRNA wobble uridine modification and cytoplasm localization	CAL0003944	GO:0002098|GO:0005737|GO:0051539|GO:0016226	GO:0051539=4 iron, 4 sulfur cluster binding	GO:0005737=cytoplasm	GO:0002098=tRNA wobble uridine modification|GO:0016226=iron-sulfur cluster assembly	GO:0051539|GO:0002098|GO:0016226|GO:0005737
CAL0003945	0.152974	Detected	-0.152974	Detected	0	-1.88977	Detected	-0.342612	Detected	-1.11619	0.292576	1821.16	1449.56	532.65	1245.95	CAL0003945	CAL0003945	CAL0003945 (alignment of 60bp with 100.00% identity) , Description: Predicted ORF in Assemblies 19, 20 and 21; induced upon biofilm formation, Location: 1977755..1978411 in Candida albicans Ca21chr2, Gene: orf19.1388 , :: Next best Hit, CAL0001131 (alig	ACAAACGAAGTGATAAAGGTTATTTATGGGACTATGAAAGTCGATGACAATGATGAATCG	CAL0003945	orf19.1388	NOP16	orf19.8966|IPF25964.1|IPF12382.2|Contig4-2576_0005|CA0886|orf6.2076|CaO19.8966|CaO19.1388|IPF12382|CAWG_06039	Ca21chr2_C_albicans_SC5314	Putative 66S pre-ribosomal particle component; Hap43p-induced gene; induced upon biofilm formation	CAL0003945	GO:0003674|GO:0005730|GO:0042273|GO:0030687	GO:0003674=molecular_function	GO:0005730=nucleolus|GO:0030687=preribosome, large subunit precursor	GO:0042273=ribosomal large subunit biogenesis	GO:0003674|GO:0042273|GO:0005730|GO:0030687
CAL0003946	0.0484118	Detected	-0.0484118	Detected	0	-0.298026	Detected	-0.463183	Detected	-0.380604	0.0578222	32441.3	29849.6	30749	21949.9	CAL0003946	CAL0003946	CAL0003946 (alignment of 60bp with 100.00% identity) , Description: Predicted ORF in Assemblies 19, 20 and 21, Location: 1974713..1975204 in Candida albicans Ca21chr2, Gene: orf19.1389 , :: Next best Hit, CAL0006396 (alignment of 23bp with 95.65% ident	AGAGGTAGAGGCAGAGGTGGTTTTAATTCCAGAGGCACTAGAAATGGTGACTCTGAACAA	CAL0003946	orf19.1389	SGN1	orf19.8967|IPF18804.2|IPF12381.2|Contig4-2576_0010|CA0885|orf6.2075|orf6.2241|CaO19.1389|SGN11|IPF12381|CAWG_06038	Ca21chr2_C_albicans_SC5314	Ortholog(s) have poly(A) RNA binding activity, role in mRNA metabolic process and cytoplasm localization	CAL0003946	GO:0005737|GO:0000166|GO:0016071|GO:0008143	GO:0000166=nucleotide binding|GO:0008143=poly(A) RNA binding	GO:0005737=cytoplasm	GO:0016071=mRNA metabolic process	GO:0000166|GO:0008143|GO:0016071|GO:0005737
CAL0003086	-0.0819125	Detected	0.0819125	Detected	0	-0.318914	Detected	-0.191154	Detected	-0.255034	0.133474	10754.1	11854.4	10996.4	9616.8	CAL0003086	CAL0003086	CAL0003086 (alignment of 60bp with 100.00% identity) , Description: Subunit of the NuA4 histone acetyltransferase complex, Location: 254562..266027 in Candida albicans Ca21chr6, Gene: orf19.139 , :: Next best Hit, CAL0002884 (alignment of 14bp with 100	CAAGCTGTTAATCCTCGTAATTTAGCTTCAGCTGATACCTTATGGATGGCATACTTTTAA	CAL0003086	orf19.139	TRA1	orf19.7783|orf19.10955|IPF27181.1|IPF14787.2|IPF23848.1|IPF5342.2|orf6.3475|CA1335|CA1814|orf6.2789|orf19.3451|TRA1.5eoc|CAWG_05233	Ca21chr6_C_albicans_SC5314	Subunit of the NuA4 histone acetyltransferase complex	CAL0003086	GO:0046695|GO:0006281|GO:0043967|GO:0000124|GO:0045944|GO:0010389|GO:0035267|GO:0016773|GO:0006338|GO:0010485|GO:0070209	GO:0016773=phosphotransferase activity, alcohol group as acceptor|GO:0010485=H4 histone acetyltransferase activity	GO:0046695=SLIK (SAGA-like) complex|GO:0000124=SAGA complex|GO:0035267=NuA4 histone acetyltransferase complex|GO:0070209=ASTRA complex	GO:0006281=DNA repair|GO:0043967=histone H4 acetylation|GO:0045944=positive regulation of transcription from RNA polymerase II promoter|GO:0010389=regulation of G2/M transition of mitotic cell cycle|GO:0006338=chromatin remodeling	GO:0010485|GO:0016773|GO:0043967|GO:0006338|GO:0010389|GO:0006281|GO:0045944|GO:0000124|GO:0070209|GO:0046695|GO:0035267
CAL0003968	0.10724	Detected	-0.10724	Detected	0	0.0130763	Detected	0.0650539	Detected	0.0390651	0.757156	146.971	124.639	165.923	137.68	CAL0003968	CAL0003968	CAL0003968 (alignment of 60bp with 100.00% identity) , Description: Predicted ORF in Assemblies 19, 20 and 21, Location: Complement (1971768..1971259) in Candida albicans Ca21chr2, Gene: orf19.1391 , :: Next best Hit, CAL0003086 (alignment of 16bp with	GCACTCCAGGAGTTGATTTCACAATACAACCATTACACAATAGTTATAAGAAAAGCATAG	CAL0003968	orf19.1391		orf19.8969|IPF25966.1|IPF11069.2|Contig4-2636_0007|CA0989|orf6.2243|CaO19.8969|CaO19.1391|IPF11069|CAWG_06036	Ca21chr2_C_albicans_SC5314	Hap43p-repressed gene	CAL0003968	GO:0008150|GO:0005575|GO:0016740	GO:0016740=transferase activity	GO:0005575=cellular_component	GO:0008150=biological_process	GO:0016740|GO:0008150|GO:0005575
CAL0003969	-0.0573554	Detected	0.0573554	Detected	0	0.50899	Detected	0.0380893	Detected	0.27354	0.376184	2956.32	3149.71	5275.45	3046.66	CAL0003969	CAL0003969	CAL0003969 (alignment of 60bp with 100.00% identity) , Description: Predicted ORF in Assemblies 19, 20 and 21, Location: 1969059..1971272 in Candida albicans Ca21chr2, Gene: orf19.1392 , :: Next best Hit, CAL0003076 (alignment of 19bp with 100.00% iden	ACACCTAGCAGTGGCGGTGGTGGTATTATTGGTAATAATTTTACGCCTAAGAAGGATTAA	CAL0003969	orf19.1392	EPS1	orf19.8970|IPF25932.1|IPF11068.1|Contig4-2636_0008|CA0990|orf6.2244|CaO19.8970|EPS1|CaO19.1392|IPF11068|CAWG_06035	Ca21chr2_C_albicans_SC5314	Ortholog(s) have chaperone binding, protein disulfide isomerase activity, unfolded protein binding activity, role in ER-associated protein catabolic process, protein retention in ER lumen and endoplasmic reticulum membrane localization	CAL0003969	GO:0005789|GO:0051087|GO:0003756|GO:0045454|GO:0006621|GO:0051082|GO:0030433	GO:0051087=chaperone binding|GO:0003756=protein disulfide isomerase activity|GO:0051082=unfolded protein binding	GO:0005789=endoplasmic reticulum membrane	GO:0045454=cell redox homeostasis|GO:0006621=protein retention in ER lumen|GO:0030433=ER-associated protein catabolic process	GO:0051082|GO:0003756|GO:0051087|GO:0045454|GO:0030433|GO:0006621|GO:0005789
CAL0003970	-0.0963607	Detected	0.0963607	Detected	0	0.296625	Detected	0.211487	Detected	0.254056	0.137377	4321.46	4859.96	6838.35	5159.92	CAL0003970	CAL0003970	CAL0003970 (alignment of 60bp with 100.00% identity) , Description: Predicted ORF in Assemblies 19, 20 and 21, Location: 1967614..1968714 in Candida albicans Ca21chr2, Gene: orf19.1393 , :: Next best Hit, CAL0001928 (alignment of 24bp with 95.83% ident	GCACGAACTTTACCTGCCAGTGCTGTGACATTAGTAAGTTTTGAATATTTCAAAACATAT	CAL0003970	orf19.1393	YIA6	orf19.8971|IPF11065.2|IPF18374.2|Contig4-2636_0009|CA0991|orf6.2245|orf6.5346|CaO19.1393|IPF11065|CAWG_06034	Ca21chr2_C_albicans_SC5314	Ortholog(s) have NAD transporter activity, pyruvate secondary active transmembrane transporter activity, role in NAD transport, mitochondrial pyruvate transport and endoplasmic reticulum, mitochondrion localization	CAL0003970	GO:0005739|GO:0043132|GO:0006850|GO:0005783|GO:0005477|GO:0005743|GO:0055085|GO:0051724	GO:0005477=pyruvate secondary active transmembrane transporter activity|GO:0051724=NAD transporter activity	GO:0005739=mitochondrion|GO:0005783=endoplasmic reticulum|GO:0005743=mitochondrial inner membrane	GO:0043132=NAD transport|GO:0006850=mitochondrial pyruvate transport|GO:0055085=transmembrane transport	GO:0051724|GO:0005477|GO:0006850|GO:0043132|GO:0055085|GO:0005743|GO:0005783|GO:0005739
CAL0003971	0.0967312	Detected	-0.0967312	Detected	0	-0.0166645	Detected	-0.22211	Detected	-0.119387	0.486577	1140	980.967	1269.96	881.587	CAL0003971	CAL0003971	CAL0003971 (alignment of 60bp with 100.00% identity) , Description: Protein not essential for viability; protein level decreased in stationary phase cultures, Location: Complement (1966535..1966035) in Candida albicans Ca21chr2, Gene: orf19.1394 , :: Ne	AATGGTATGACGTTGATGAAAAATCAAATGATGAGGTATCTATAGTAGATGTGAGTTGGG	CAL0003971	orf19.1394	YCR090C	orf19.8972|IPF11063.2|IPF29472.1|YCR090|CA0992|orf6.2246|orf6.5347|CaO19.1394|IPF11063|CAWG_06033	Ca21chr2_C_albicans_SC5314	Putative protein of unknown function; protein not essential for viability; protein level decreases in stationary phase cultures	CAL0003971	GO:0008150|GO:0003674|GO:0005634|GO:0005829	GO:0003674=molecular_function	GO:0005634=nucleus|GO:0005829=cytosol	GO:0008150=biological_process	GO:0003674|GO:0008150|GO:0005634|GO:0005829
CAL0003972	0.0442166	Detected	-0.0442166	Detected	0	2.13838	Detected	1.63428	Detected	1.88633	0.0179108	2895.48	2679.7	14898.6	8408.47	CAL0003972	CAL0003972	CAL0003972 (alignment of 60bp with 100.00% identity) , Description: Predicted ORF in Assemblies 19, 20 and 21, Location: Complement (1963177..1962161) in Candida albicans Ca21chr2, Gene: orf19.1395 , :: Next best Hit, CAL0004953 (alignment of 16bp with	CTGTGAGAATCGTTATGATTGGTACTTTGACTGGATTCCAATGGTTGATTTATGATTCAT	CAL0003972	orf19.1395	PIC2	orf19.8973|IPF11059.2|IPF7686.2|Contig4-2842_0004|CA3169|orf6.5348|CaO19.8973|CaO19.1395|IPF7686|CA0993|IPF11059|IPF11059.1|CAWG_06032	Ca21chr2_C_albicans_SC5314	Ortholog(s) have inorganic phosphate transmembrane transporter activity, role in phosphate ion transport, transmembrane transport and mitochondrion localization	CAL0003972	GO:0005739|GO:0006817|GO:0005315|GO:0055085	GO:0005315=inorganic phosphate transmembrane transporter activity	GO:0005739=mitochondrion	GO:0006817=phosphate ion transport|GO:0055085=transmembrane transport	GO:0005315|GO:0055085|GO:0006817|GO:0005739
CAL0003973	0.0242057	Detected	-0.0242057	Detected	0	0.420327	Detected	0.397672	Detected	0.408999	0.00424246	1339.96	1274.99	2124.99	1674.4	CAL0003973	CAL0003973	CAL0003973 (alignment of 60bp with 100.00% identity) , Description: Predicted ORF in Assemblies 19, 20 and 21, Location: 1960784..1961947 in Candida albicans Ca21chr2, Gene: orf19.1396 , :: Next best Hit, CAL0005750 (alignment of 17bp with 100.00% iden	ACCTCGTCATTAAACGTCAATGGATTAGATGACGATTTGTTCAAGAATGTATGGGGGTGA	CAL0003973	orf19.1396	AGE2	orf19.8974|IPF25950.1|IPF7685.2|Contig4-2842_0005|CA3170|orf6.5349|CaO19.1396|AGE2|CaO19.8974|IPF7685|CAWG_06031	Ca21chr2_C_albicans_SC5314	Ortholog(s) have ARF GTPase activator activity, role in ER to Golgi vesicle-mediated transport, intra-Golgi vesicle-mediated transport and Golgi apparatus, clathrin-coated vesicle localization	CAL0003973	GO:0006888|GO:0043565|GO:0008060|GO:0006355|GO:0005794|GO:0003700|GO:0032312|GO:0030136|GO:0006891|GO:0008270	GO:0043565=sequence-specific DNA binding|GO:0008060=ARF GTPase activator activity|GO:0003700=sequence-specific DNA binding transcription factor activity|GO:0008270=zinc ion binding	GO:0005794=Golgi apparatus|GO:0030136=clathrin-coated vesicle	GO:0006888=ER to Golgi vesicle-mediated transport|GO:0006355=regulation of transcription, DNA-dependent|GO:0032312=regulation of ARF GTPase activity|GO:0006891=intra-Golgi vesicle-mediated transport	GO:0008270|GO:0003700|GO:0043565|GO:0008060|GO:0006355|GO:0032312|GO:0006888|GO:0006891|GO:0030136|GO:0005794
CAL0003974	-0.00039959	Detected	0.00039959	Detected	0	0.321534	Detected	0.395685	Detected	0.35861	0.0105217	2097.64	2065.19	3159.83	2662.6	CAL0003974	CAL0003974	CAL0003974 (alignment of 60bp with 100.00% identity) , Description: Predicted ORF in Assemblies 19, 20 and 21, Location: Complement (1958644..1957934) in Candida albicans Ca21chr2, Gene: orf19.1397 , :: Next best Hit, CAL0004474 (alignment of 15bp with	TTAGAGAGCATTTCAGAATGCTATCACTTGGTATATTGGCGCTTGTTTCATTGATATTGT	CAL0003974	orf19.1397		orf19.8975|IPF25962.1|IPF7681.2|Contig4-2842_0012|CA3171|orf6.5350|CaO19.8975|CaO19.1397|IPF7681|CAWG_06030	Ca21chr2_C_albicans_SC5314	Has domain(s) with predicted heme binding activity	CAL0003974	GO:0008150|GO:0005575|GO:0020037	GO:0020037=heme binding	GO:0005575=cellular_component	GO:0008150=biological_process	GO:0020037|GO:0008150|GO:0005575
CAL0004448	0.0263529	Detected	-0.0263529	Detected	0	0.430996	Detected	0.250178	Detected	0.340587	0.0686691	1587.45	1505.99	2532.39	1788.21	CAL0004448	CAL0004448	CAL0004448 (alignment of 60bp with 100.00% identity) , Description: Predicted ORF in Assemblies 19, 20 and 21, Location: Complement (1957138..1954895) in Candida albicans Ca21chr2, Gene: orf19.1400 , :: Next best Hit, CAL0000929 (alignment of 14bp with	GGGCAACGATAACAACTTCAACTATGTCCAGAGCAGATATTGAACTATCGAATTTTAATA	CAL0004448	orf19.1400		orf19.8978|IPF25931.1|IPF7679.2|Contig4-2842_0014|CA3172|orf6.5353|CaO19.1400|CSN2|CaO19.8978|IPF7676|CAWG_06029	Ca21chr2_C_albicans_SC5314	Ortholog of C. parapsilosis CDC317 : CPAR2_406130, Candida tenuis NRRL Y-1498 : CANTEDRAFT_116273, Debaryomyces hansenii CBS767 : DEHA2B11176g and Candida dubliniensis CD36 : CD36_23640	CAL0004448	GO:0008150|GO:0003674|GO:0005575	GO:0003674=molecular_function	GO:0005575=cellular_component	GO:0008150=biological_process	GO:0003674|GO:0008150|GO:0005575
CAL0004450	-0.102581	Detected	0.102581	Detected	0	0.534655	Detected	0.436848	Detected	0.485752	0.0506129	1036.4	1175.64	1942.57	1452.96	CAL0004450	CAL0004450	CAL0004450 (alignment of 60bp with 100.00% identity) , Description: Cell wall adhesin required for cell-cell adhesion and biofilm formation; GPI anchored; Efg1p-regulated; suppresses polystyrene or cell adhesion, filamentation, invasive growth defects of	GGCTCTGCACTTAAAAAACCATACTACGGTTTAGCAGTGGCTGCATTAGTCTACTTTATG	CAL0004450	orf19.1401	EAP1	orf6.5354|PGA47|IPF7676.3|IPF14145.2|Contig4-2651_0004|CA3173|CaO19.1401|IPF14145|CAWG_06028	Ca21chr2_C_albicans_SC5314	GPI-anchored cell wall adhesin; cell-cell adhesion, biofilm formation; Efg1p-regulated; mutant suppresses polystyrene or cell adhesion, filamentation, invasive growth defects of S. cerevisiae flo8 or flo11 mutant; biofilm-induced	CAL0004450	GO:0044406|GO:0016337|GO:0044407|GO:0009986|GO:0009277|GO:0044011|GO:0007155|GO:0046658|GO:0050839	GO:0050839=cell adhesion molecule binding	GO:0009986=cell surface|GO:0009277=fungal-type cell wall|GO:0046658=anchored to plasma membrane	GO:0044406=adhesion to host|GO:0016337=cell-cell adhesion|GO:0044407=single-species biofilm formation in or on host organism|GO:0044011=single-species biofilm formation on inanimate substrate|GO:0007155=cell adhesion	GO:0050839|GO:0007155|GO:0007155|GO:0016337|GO:0007155|GO:0044406|GO:0016337|GO:0007155|GO:0044407|GO:0044011|GO:0044011|GO:0009986|GO:0046658|GO:0009277
CAL0004452	0.0231886	Detected	-0.0231886	Detected	0	-0.348402	Detected	-0.239483	Detected	-0.293942	0.0382387	27859.6	26546.2	25949.9	22399.8	CAL0004452	CAL0004452	CAL0004452 (alignment of 60bp with 100.00% identity) , Description: Predicted ORF in Assemblies 19, 20 and 21; protein detected by mass spec in exponential and stationary phase cultures, Location: Complement (1947860..1946280) in Candida albicans Ca21ch	TTATTACGAGTTGATAACATCATTCGAGCAAAACCCAGAACTGCCGATAGAAATCATTAG	CAL0004452	orf19.1402	CCT2	orf19.8980|IPF25943.1|IPF11584.2|Contig4-2651_0001|CA3174|orf6.5355|CaO19.8980|CaO19.1402|CAWG_06027	Ca21chr2_C_albicans_SC5314	Chaperonin of the cytosolic TCP1 ring complex; protein present in exponential and stationary-phase yeast cells, but higher amounts in stationary phase; GlcNAc-induced protein	CAL0004452	GO:0005832|GO:0006457|GO:0005634|GO:0051082|GO:0005524	GO:0051082=unfolded protein binding|GO:0005524=ATP binding	GO:0005832=chaperonin-containing T-complex|GO:0005634=nucleus	GO:0006457=protein folding	GO:0005524|GO:0051082|GO:0006457|GO:0005634|GO:0005832
CAL0004453	-0.0206561	Detected	0.0206561	Detected	0	0.243837	Detected	0.395599	Detected	0.319718	0.055513	11847.4	11996.2	17149.9	15249.9	CAL0004453	CAL0004453	CAL0004453 (alignment of 60bp with 100.00% identity) , Description: Predicted ORF in Assemblies 19, 20 and 21, Location: Complement (1945393..1943675) in Candida albicans Ca21chr2, Gene: orf19.1403 , :: Next best Hit, CAL0004639 (alignment of 16bp with	CAAGGTTGCTCCAGCAGTGTCGATTAGTTATTTTGTTTATGAATCATTAATTAGACGCTT	CAL0004453	orf19.1403	SAL1	orf19.8981|IPF25937.1|IPF11587.2|Contig4-2113_0002|CA3175|orf6.5356|IPF11587|CaO19.1403|CaO19.8981|CAWG_06026	Ca21chr2_C_albicans_SC5314	Ortholog(s) have ATP:ADP antiporter activity, calcium ion binding activity, role in ADP transport, ATP transport, mitochondrial transport and mitochondrion localization	CAL0004453	GO:0005739|GO:0005509|GO:0005743|GO:0015866|GO:0015867|GO:0006839|GO:0005471	GO:0005509=calcium ion binding|GO:0005471=ATP:ADP antiporter activity	GO:0005739=mitochondrion|GO:0005743=mitochondrial inner membrane	GO:0015866=ADP transport|GO:0015867=ATP transport|GO:0006839=mitochondrial transport	GO:0005471|GO:0005509|GO:0015867|GO:0015866|GO:0006839|GO:0005739|GO:0005743
CAL0004455	0.113378	Detected	-0.113378	Detected	0	-1.22056	Detected	-0.33201	Detected	-0.776284	0.232524	4629.73	3892.99	2213.21	3279.6	CAL0004455	CAL0004455	CAL0004455 (alignment of 60bp with 100.00% identity) , Description: Predicted ORF in Assemblies 19, 20 and 21, Location: 1942108..1943511 in Candida albicans Ca21chr2, Gene: orf19.1404 , :: Next best Hit, CAL0000920 (alignment of 16bp with 100.00% iden	TCCAATGATGATGAGGGCCATAGTAAACTCAAAAAGCAAGCAACACTAGTTCAAAATTAG	CAL0004455	orf19.1404	DUS1	orf19.8982|IPF25946.1|IPF11588.2|Contig4-2113_0003|CA3176|orf6.5357|CaO19.8982|CaO19.1404|DUS1|IPF11588|CAWG_06025	Ca21chr2_C_albicans_SC5314	Ortholog(s) have tRNA dihydrouridine synthase activity, role in tRNA modification and mitochondrion, nucleus localization	CAL0004455	GO:0005739|GO:0050660|GO:0017150|GO:0005634|GO:0006400|GO:0055114	GO:0050660=flavin adenine dinucleotide binding|GO:0017150=tRNA dihydrouridine synthase activity	GO:0005739=mitochondrion|GO:0005634=nucleus	GO:0006400=tRNA modification|GO:0055114=oxidation-reduction process	GO:0050660|GO:0017150|GO:0055114|GO:0006400|GO:0005634|GO:0005739
CAL0004458	0.111731	Detected	-0.111731	Detected	0	-0.00617504	Detected	0.0152521	Detected	0.00453854	0.97142	3612.4	3044.49	4011.65	3259.07	CAL0004458	CAL0004458	CAL0004458 (alignment of 60bp with 100.00% identity) , Description: Transcription is regulated upon yeast-hyphal switch, Location: 1940951..1941916 in Candida albicans Ca21chr2, Gene: orf19.1405 , :: Next best Hit, CAL0000035 (alignment of 19bp with 10	GGGCCAAAGCTTGGTTCCGAGATACTACATCGATTCATTAACAAAATTAATTGAACTTTT	CAL0004458	orf19.1405	PHO13	orf19.8983|IPF25952.1|IPF11589.2|Contig4-2113_0004|CA3177|orf6.5358|CaO19.1405|CaO19.8983|PHO132|IPF11589|CAWG_06024	Ca21chr2_C_albicans_SC5314	Putative 4-nitrophenylphosphatase; Hap43p-repressed gene; transcription is regulated upon yeast-hyphal switch	CAL0004458	GO:0016787|GO:0008152|GO:0005575	GO:0016787=hydrolase activity	GO:0005575=cellular_component	GO:0008152=metabolic process	GO:0016787|GO:0008152|GO:0005575
CAL0004461	0.0534921	Detected	-0.0534921	Detected	0	0.688342	Detected	0.373935	Detected	0.531138	0.0854077	319.547	291.955	597.949	384.891	CAL0004461	CAL0004461	CAL0004461 (alignment of 60bp with 100.00% identity) , Description: Predicted ORF in Assemblies 19, 20 and 21, Location: 1939666..1940436 in Candida albicans Ca21chr2, Gene: orf19.1406 , :: Next best Hit, CAL0003297 (alignment of 14bp with 100.00% iden	GCAATAGAGACAATGATAGTAGAGATAACGAGACACAATGTATTTTTGAACCTATTGGAG	CAL0004461	orf19.1406	REV7	orf19.8984|IPF25961.1|IPF19974.1|Contig4-2113_0005|Contig4-2113_0006|CA3178|orf6.5359|CaO19.8984|REV7|CaO19.1406|IPF19974|CAWG_06023	Ca21chr2_C_albicans_SC5314	Ortholog(s) have DNA-directed DNA polymerase activity, role in error-free translesion synthesis, error-prone translesion synthesis and mitochondrion, nuclear chromatin, zeta DNA polymerase complex localization	CAL0004461	GO:0005739|GO:0000790|GO:0042276|GO:0007067|GO:0003887|GO:0016035|GO:0070987	GO:0003887=DNA-directed DNA polymerase activity	GO:0005739=mitochondrion|GO:0000790=nuclear chromatin|GO:0016035=zeta DNA polymerase complex	GO:0042276=error-prone translesion synthesis|GO:0007067=mitosis|GO:0070987=error-free translesion synthesis	GO:0003887|GO:0007067|GO:0042276|GO:0070987|GO:0016035|GO:0005739|GO:0000790
[truncated: 5,858 more rows]

## Sheet: Table S1B
Planktonic state microarray up-regulated genes
	SC 5314					SC 5314 Delta Delta														Previous Annotation												Updated Annotation
[truncated: 639 more rows]

## Sheet: Table S1C
planktonic state microarray down-regulated genes
	SC 5314					SC 5314 Delta Delta														Previous Annotation												Updated Annotation
[truncated: 411 more rows]

## Sheet: Table S1D
P-value for planktonic state microaary class
FunctionName	Up	Down	Total no of Differential	Sum of differntials	Differential not found	Total Probe Hits	Total no of Genes	Genes not found	Fisher exact test P_Value	Result
Adhesion	20	4	24	857	833	116	6204	6088	0.087438	not significant at p < .05.
[truncated: 17 more rows]

## Sheet: Table S1E
Spider biofilm state microarray data H3VCTG mutant vs wild type
[truncated: 6,203 more rows]

[truncated: 4 more sheets: Table S1F, Table S1G, Table S1H, Table S1I]
