# Supplementary material for: The Candida albicans biofilm gene circuit modulated at the chromatin level by a recent molecular histone innovation
Source: PLoS Biol. 2019 Aug 9;17(8):e3000422. doi: 10.1371/journal.pbio.3000422 (PMC6703697; doi:10.1371/journal.pbio.3000422)
Supplement: S2 Data — (XLSX) [file pbio.3000422.s013.xlsx]

## Sheet: Sheet1
Related to Fig.3B
Individual numerical values of real time PCR between hht1 null mutant and wild type
	Gene name	Individuals	Gene ct wild type	Gene ct del	log2
	HWP1	1	7.87	3.57	-4.3
		2	6.25	3.1	-3.15
		3	6.57	4	-2.57
	ECE1	1	10.09	6.06	-4.03
		2	9.57	5.39	-4.18
		3	7.1	4.81	-2.29
	ALS3	1	4.75	2.94	-1.81
		2	6.44	3.92	-2.52
		3	6.41	4.47	-1.94
	MET3	1	4.79	2.72	-2.07
		2	5.47	4.05	-1.42
		3	3.54	1.41	-2.13
	JEN2	1	8.74	7.19	-1.55
		2	9.23	8.24	-0.99
		3	11.04	9.26	-1.78
	ALD6	1	5.59	1.9	-3.69
		2	5.77	3.5	-2.27
		3	7.17	4.75	-2.42
	YWP1	1	0.46	1.81	1.35
		2	0.23	1.93	1.7
		3	0.69	2.38	1.69
	GCA1	1	8.03	5.73	-2.3
		2	4.54	2.26	-2.28
		3	6.47	3.1	-3.37

## Sheet: Sheet2
Related to Fig.3D
Individual numerical values of biomass
	Biomass WT (SC5314)	Biomass of LR107	Biomass of LR108	Biomass of LR109
1	2.3	4.4	4.2	2.1
2	2.9	5.2	6.6	2.2
3	3.1	5.9	5.7	3.4

## Sheet: Sheet3
Related to Fig.4A
Individual numerical values of ChIP qPCR
		Untagged			1061 Plnaktonic			6791 Planktonic
	Gene name	1	2	3	1	2	3	1	2	3
	BMT7	0.0267	0.0251	0.0061	1.104	0.841	1.663	1.967	3.174	2.33
	CAN1	0.07	0.0219	0.0054	0.945	1.333	1	2.251	2.434	1.588
	ECE1	0.019	0.0293	0.013	1.213	1.112	1.388	1.985	1.786	1.47
	HWP1	0.0172	0.021	0.0095	0.895	0.816	0.822	1.52	2.094	1.19
	HGT2	0.0225	0.0225	0.0046	0.936	1.347	1.055	2.1	1.822	2.41
	JEN2	0.0367	0.0225	0.0125	1.377	0.924	1.104	1.813	3.145	2.47
	SAP5	0.0147	0.053	0.24	1.1	0.97	1.021	1.813	1.927	1.514
	ORF19.7380	0.016	0.013	0.012	1.347	1.253	1.195	1.609	1.509	1.48
	NRG1	0.01	0.021	0.004	2.21	1.0993	1.816	1.773	1.75	1.973
	YWP1	0.0201	0.0241	0.0043	1.023	0.93	0.827	1.102	2.11	1.52

## Sheet: Sheet4
Related to Fig.4B
Individual numerical values of ChIP qPCR
		Gene name	6791 Planktonic			6791 Biofilm
			1	2	3	1	2	3
		BMT7	1.967	3.174	2.33	1.23	1.744	1.107
		CAN1	2.251	2.434	1.588	0.791	0.753	1.032
		ECE1	1.985	1.786	1.47	1.259	1.084	1.315
		HWP1	1.52	2.094	1.19	1.22	0.984	1.216
		HGT2	2.1	1.822	2.41	1.18	1.294	0.89
		JEN2	1.813	3.145	2.47	1.23	1.162	1.221
		SAP5	1.813	1.927	1.514	1.736	2.068	1.761
		ORF19.7380	1.609	1.509	1.48	0.905	0.835	0.817
		NRG1	1.773	1.75	1.973	1.379	2.612	1.159
		YWP1	1.102	2.11	1.52	1.159	0.973	1.261

## Sheet: Sheet5
Related to Fig.4C
Individual numerical values of ChIP qPCR
			1061 Planktonic			1061 biofilm
		BMT7	1.104	0.841	1.663	1.216	1.21	1.17
		CAN1	0.945	1.333	1	0.697	0.898	1.29
		ECE1	1.213	1.112	1.388	0.874	0.898	0.517
		HWP1	0.895	0.816	0.822	0.947	1.124	0.926
		HGT2	0.936	1.347	1.055	0.89	0.918	0.955
		JEN2	1.377	0.924	1.104	1.248	1.047	1.135
		SAP5	1.1	0.97	1.021	1.116	1.117	0.875
		ORF19.7380	1.347	1.253	1.195	1.242	1.016	1.945
		NRG1	2.21	1.0993	1.816	0.907	0.977	0.936
		YWP1	1.023	0.93	0.827	0.686	0.628	1.079

## Sheet: Sheet6
Related to Fig.4D
Individual numerical values of ChIP qPCR
			Planktonic histone H3			Biofilm histone H3
			1	2	3	1	2	3
		BMT7	1.81927	5.05105	1.50972	1.62196	1.41774	1.1586
		CAN1	1.33142	2.67451	0.766497	2.01535	0.800952	0.559344
		ECE1	1.68835	3.91216	1.3669	1.03434	1.58595	0.967661
		HWP1	1.29291	1.61728	0.612752	1.70822	0.967525	0.51904
		HGT2	1.48387	4.20152	1.24358	1.59481	0.816659	0.534352
		JEN2	1.67153	4.5593	1.75812	1.4147	0.92456	0.76795
		SAP5	1.22305	2.19366	1.65602	2.3932	1.16642	0.570782
		orf19.7380	1.48417	1.91304	1.88376	1.43379	2.4876	1.16114
		NRG1	1.56163	0.995811	0.893715	0.764869	0.76851	0.404672
		YWP1	1.03587	1.8169	0.662516	1.37771	1.29952	0.38033

## Sheet: Sheet7
Related to Fig.4E
Individual numerical values of ChIP qPCR
		Bcr1-Myc			hht1/hht1-Bcr1-Myc
	Gene name	1	2	3	1	2	3
	JEN2	1.61044	2.17919	2.07053	5.17951	8.3416	6.27667
	ECE1	1.32292	1.32179	1.25701	4.22276	3.23217	3.605
	ALS3	1.50867	1.32582	1.49485	6.16016	7.78202	7.3615
	ORF19.7380	1.4967	1.59862	1.31951	8.38194	7.39896	7.67411
	YWP1	2.16723	1.81944	2.39605	4.73373	2.87311	2.50109

## Sheet: Sheet8
Related to Fig.5B
Individual numerical values of Optical Density Measurement at OD600
		Single mutant			Double mutant				Wild type			hht1 null
	Gene Name	1	2	3	1	2	3		1	2	3	1	2	3
	BCR1	0.0913	0.106	0.133	0.932	0.932	0.934		0.9013	0.888	0.901	0.948	0.953	0.953
	TEC1	0.087	0.086	0.107	0.943	0.95	0.887
	NDT80	0.0583	0.0643	0.0983	0.491	0.548	0.602
	BRG1	0.141	0.198	0.162	0.132	0.155	0.124
	EFG1	0.101	0.11	0.1	0.201	0.102	0.102
	ROB1	0.129	0.159	0.177	0.164	0.179	0.164

## Sheet: Sheet9
Related to Fig.5C
Biomass measurement of single and double mutant
	Individual values	Wild type	bcr1	bcr1/hht1	tec1	tec1/hht1	ndt80	ndt80/hht1	brg1	brg1/hht1	efg1	efg1/hht1	rob1	rob1/hht1
	1	4.9	1.1	4.7	1	4.9	1.7	2.4	1.2	1.5	0.92	0.97	0.91	1.4
	2	5.2	0.93	4.3	1.3	4.2	0.94	2.7	0.94	0.97	0.89	0.99	1.3	1.7
	3	5.8	1.27	3.9	1.2	5	1.46	3.1	1.3	0.93	0.95	1.2	1.1	0.95

## Sheet: Sheet10
Related to Fig.6C
Individual numerical values of biomass
	SC5314	LR108	LR109	LR142
1	1.8	4.3	2.3	2.1
2	2.2	4.6	2.5	1.9
3	1.77	4.2	2	1.38

[truncated: 6 more sheets: Sheet11, Sheet12, Sheet13, Sheet14, Sheet15, Sheet16]
